# Supplementary material for: Conformational Analysis of 1,5-Diaryl-3-Oxo-1,4-Pentadiene Derivatives: A Nuclear Overhauser Effect Spectroscopy Investigation
Source: MDPI journal article supplement (doi:10.3390/ijms242316707), 2023-11-24
Supplement: s1 [file s1]

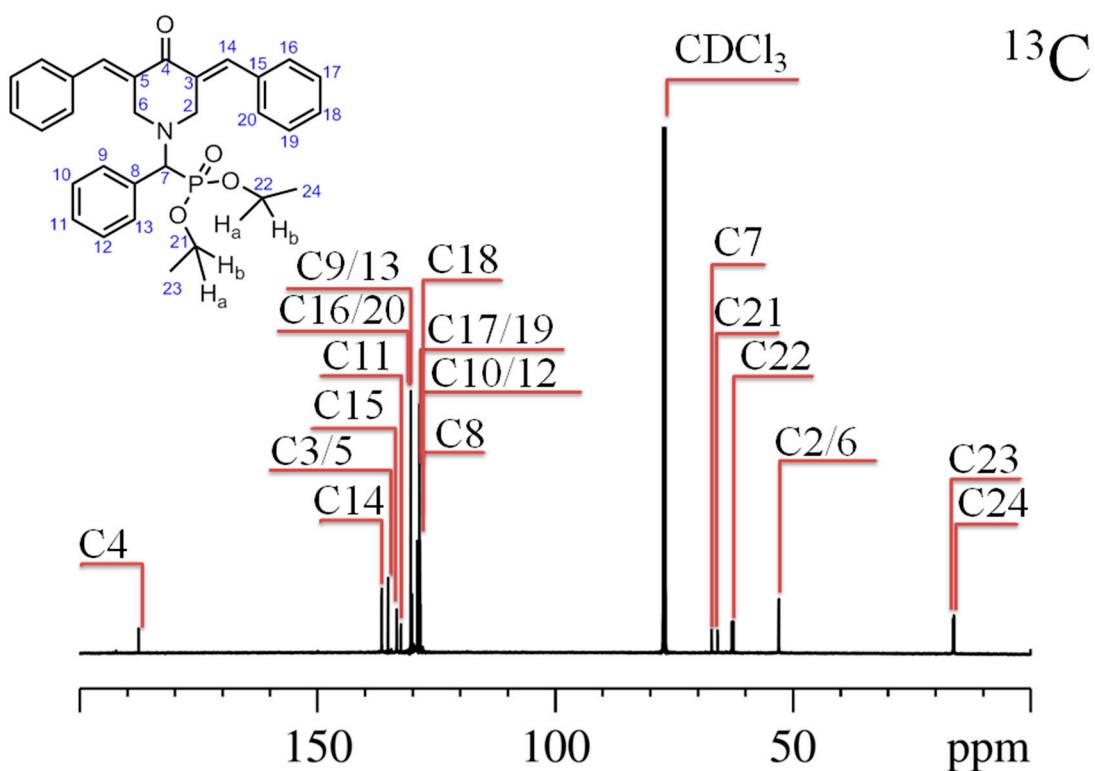

**Figure S1.** <sup>13</sup>C NMR spectrum of compound 1 in CDCl<sub>3</sub>

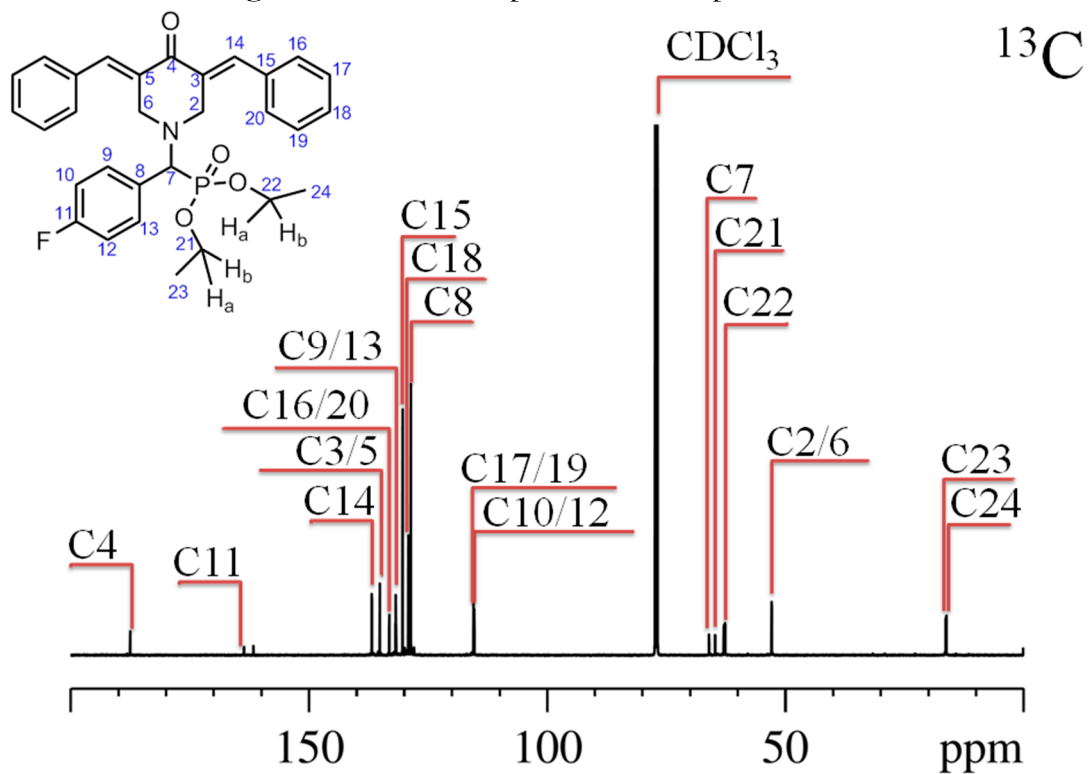

**Figure S2.** <sup>13</sup>C NMR spectrum of *compound 2* in CDCl<sub>3</sub>

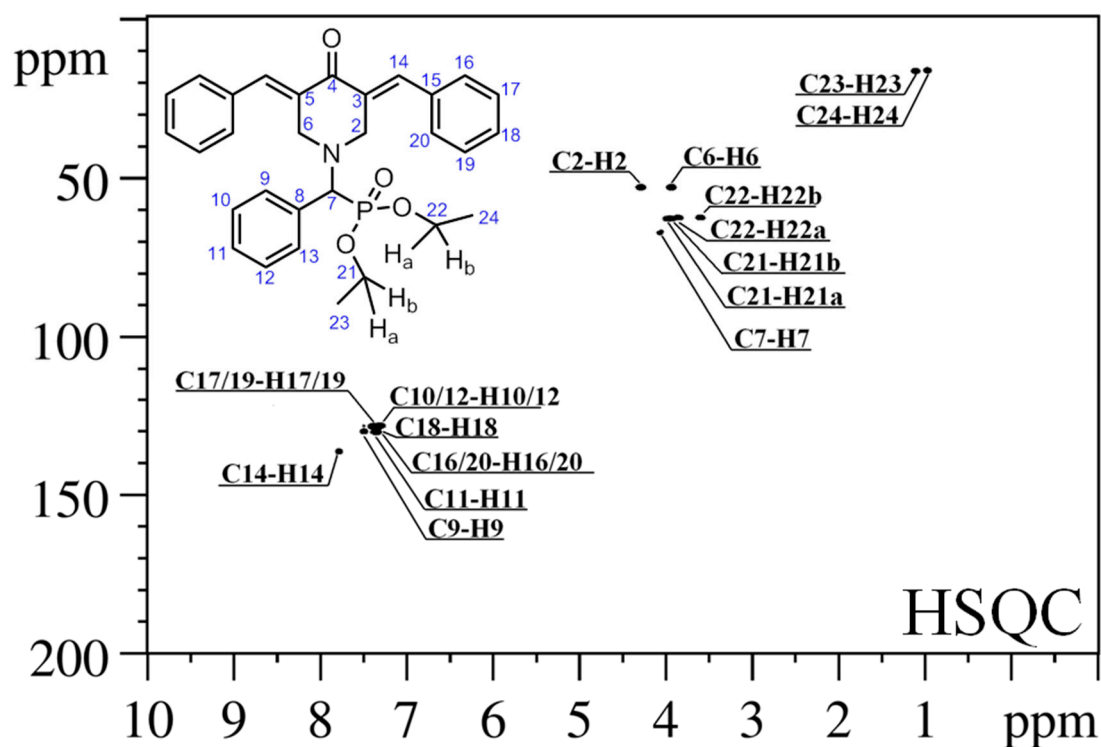

Figure S3.  $^1\text{H}$ - $^{13}\text{C}$  HSQC spectrum of *compound 1* in  $\text{CDCl}_3$

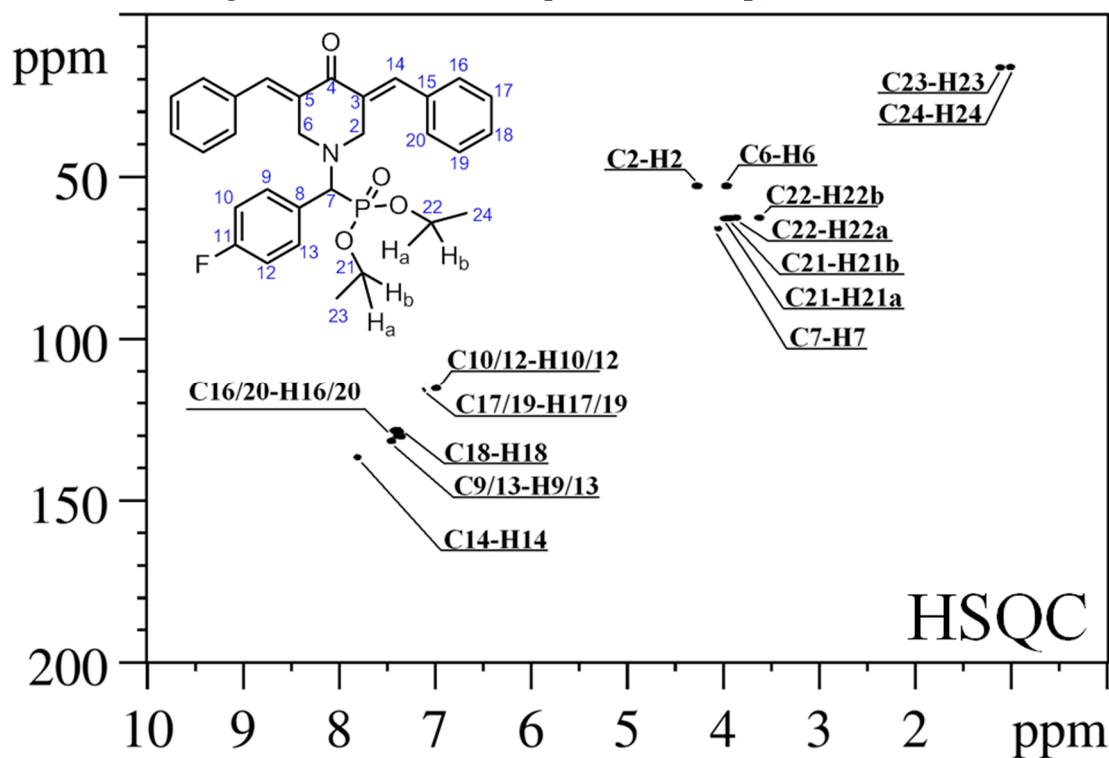

Figure S4.  $^1\text{H}$ - $^{13}\text{C}$  HSQC spectrum of *compound 2* in  $\text{CDCl}_3$

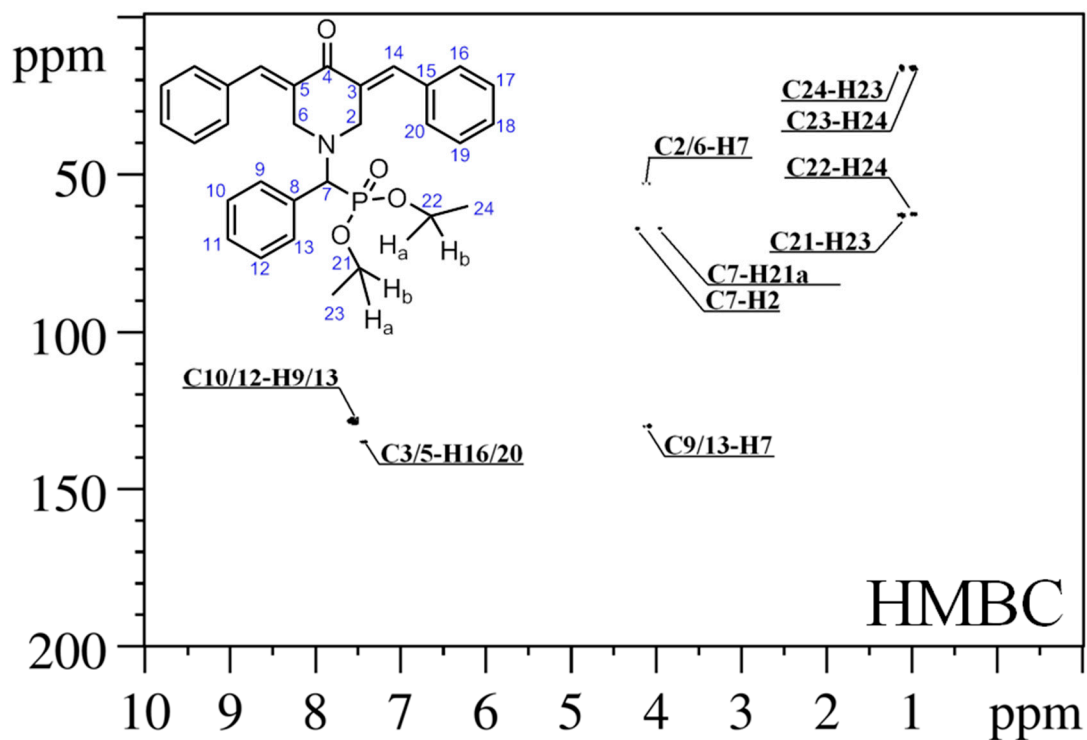

Figure S5.  $^1\text{H}$ - $^{13}\text{C}$  HMBC spectrum of **compound 1** in  $\text{CDCl}_3$

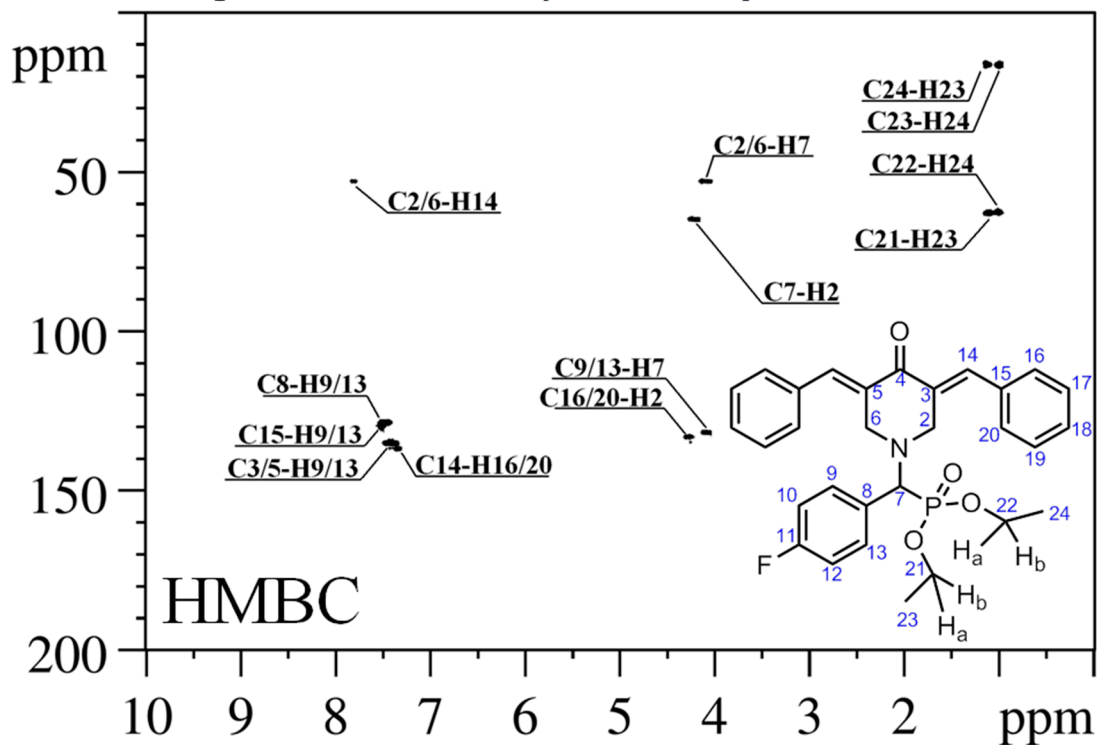

Figure S6.  $^1\text{H}$ - $^{13}\text{C}$  HMBC spectrum of **compound 2** in  $\text{CDCl}_3$

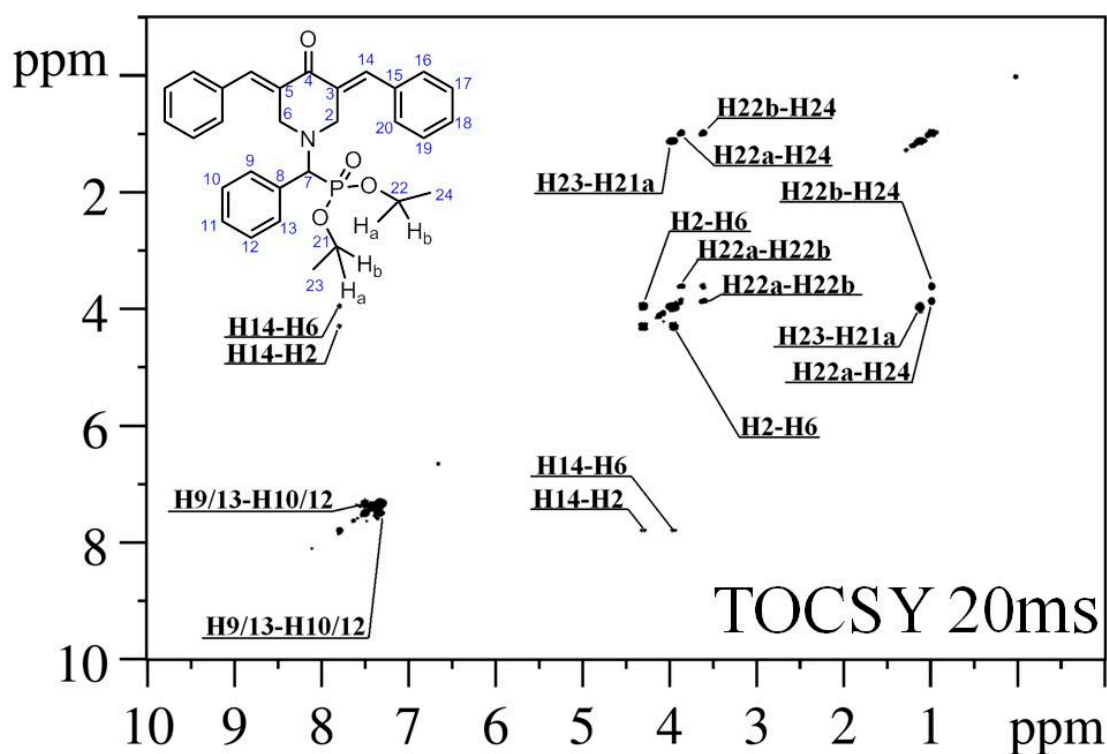

Figure S7.  $^1\text{H}$ - $^1\text{H}$  TOCSY spectrum of **compound 1** in  $\text{CDCl}_3$  (mixing time 20 ms)

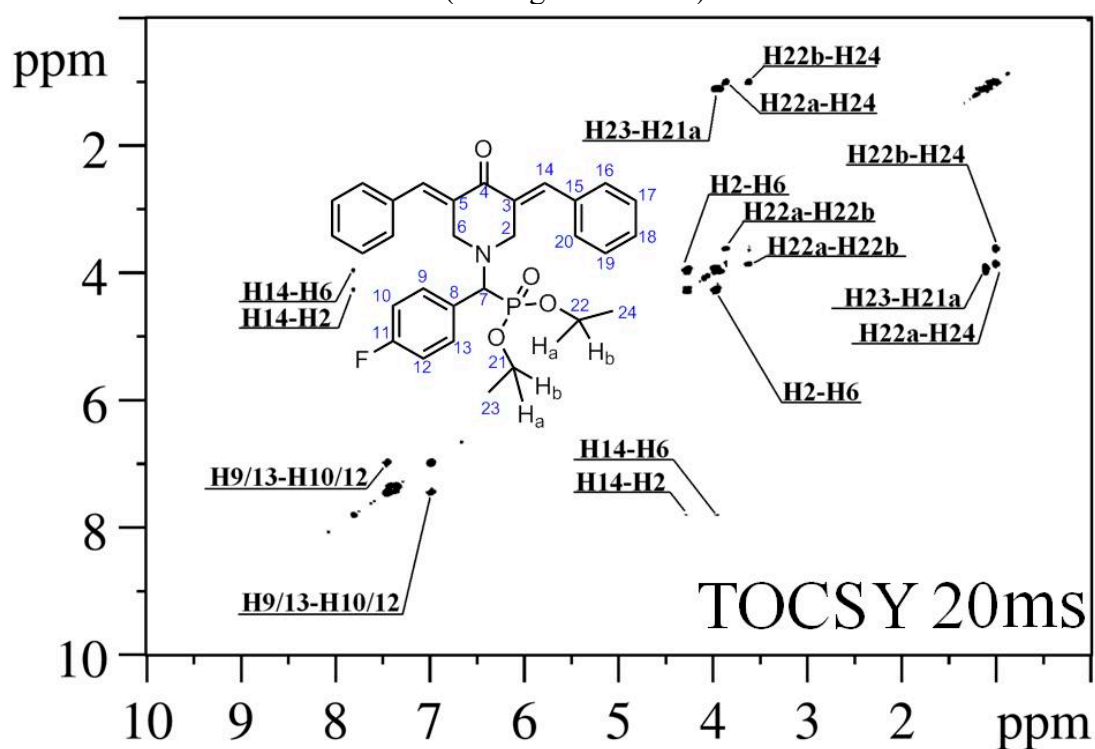

Figure S8.  $^1\text{H}$ - $^1\text{H}$  TOCSY spectrum of **compound 2** in  $\text{CDCl}_3$  (mixing time 20 ms)



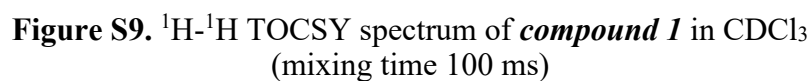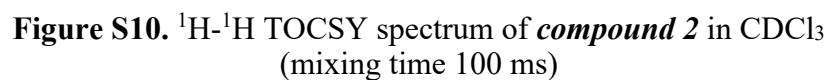

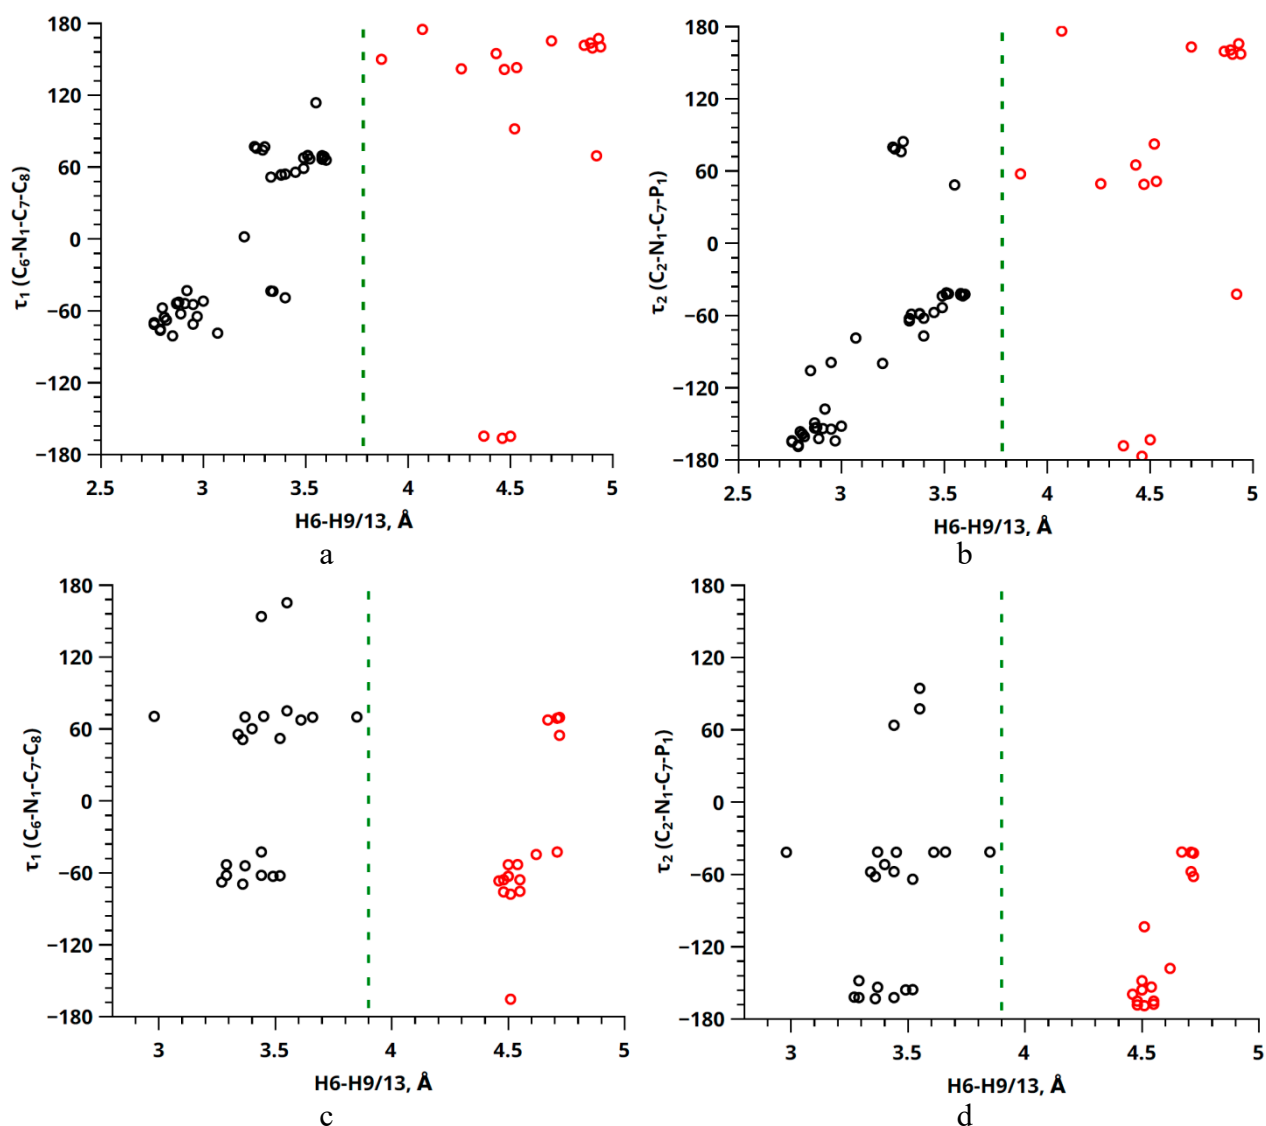

Figure S11. Angle values of different conformers A (black dots) and B (red dots) versus distances H6/H9-H13 for compound 1 (a,b) and compound 2 (c,d).

**Table S1.**  $^1\text{H}$  and  $^{13}\text{C}$  chemical shifts and observed cross-correlation peaks in 2D spectra of *compound 1* in  $\text{CDCl}_3$

| $^{13}\text{C}$ | $\Delta^{13}\text{C}$ | $^1\text{H}$ | $\delta^1\text{H}$ | HMBC             | HSQC              | TOCSY                 |                           | NOESY                                      |
|-----------------|-----------------------|--------------|--------------------|------------------|-------------------|-----------------------|---------------------------|--------------------------------------------|
|                 |                       |              |                    |                  |                   | 20 ms                 | 100 ms                    |                                            |
| C2/6            | 62.55                 | H2           | 4.30               | C2/6-H7          | C2-H2             | H2-H6                 | H2-H6                     | H2-H6<br>H2-H9/13<br>H2-H11                |
| C3/5            | 136.49                | -            | -                  | C3/5-H16/20      | -                 | -                     | -                         | -                                          |
| C4              | 187.62                | H6           | 3.96               | -                | C6-H6             | -                     | -                         | H6-H9/13<br>H6-H11                         |
| C7              | 67.09                 | H7           | 4.09               | C7-H21a<br>C7-H2 | C7-H7             | -                     | -                         | H7-H9/13<br>H7-H11                         |
| C8              | 128.33                | -            | -                  | -                | -                 | -                     | -                         | -                                          |
| C9/13           | 130.16                | H9/13        | 7.50               | C9/13-H7         | C9/13-H9/13       | H9/13-<br>H10/12      | H9/13-<br>H10/12          | H9/13-<br>H10/12<br>H9/13-H23<br>H9/13-H24 |
| C10/12          | 128.42                | H10/12       | 7.29               | C10/12-<br>H9/13 | C10/12-<br>H10/12 | -                     | -                         | -                                          |
| C11             | 132.45                | H11          | 7.34               | -                | C11-H11           | -                     | -                         | -                                          |
| C14             | 135.17                | H14          | 7.79               | -                | C14-H14           | H14-H2<br>H14-H6      | H14-H2<br>H14-H6          | H14-H2<br>H14-H6                           |
| C15             | 133.34                | -            | -                  | -                | -                 | -                     | -                         | -                                          |
| C16/20          | 130.36                | H16/20       | 7.35               | -                | C16/20-<br>H16/20 | -                     | H16/20-H2<br>H16/20-H6    | H16/20-H23                                 |
| C17/19          | 128.56                | H17/19       | 7.39               | -                | C17/19-<br>H17/19 | -                     | -                         | -                                          |
| C18             | 129.11                | H18          | 7.31               | -                | C18-H18           | -                     | -                         | -                                          |
| C21             | 65.82                 | H21a         | 3.97               | C21-H23          | C21-H21a          | -                     | -                         | -                                          |
|                 |                       | H21b         | 3.94               | -                | C21-H21b          | -                     | -                         | -                                          |
| C22             | 62.84                 | H22a         | 3.87               | C22-H24          | C22-H22a          | H22a-H22b<br>H22a-H24 | H22a-<br>H22b<br>H22a-H24 | H22a-H22b<br>H22a-H24                      |
|                 |                       | H22b         | 3.61               | -                | C22-H22b          | H22b-H24              | H22b-H24                  | -                                          |

|     |       |     |      |         |         |          |          |          |
|-----|-------|-----|------|---------|---------|----------|----------|----------|
| C23 | 16.30 | H23 | 1.12 | C23-H24 | C23-H23 | H23-H21a | H23-H21a | H23-H21a |
| C24 | 16.12 | H24 | 0.99 | C24-H23 | C24-H24 | -        | -        | -        |

**Table S2.**  $^1\text{H}$  and  $^{13}\text{C}$  chemical shifts and observed cross-correlation peaks in 2D spectra of compound 2 in  $\text{CDCl}_3$

| $^{13}\text{C}$ | $\delta^{13}\text{C}$ | $^1\text{H}$ | $\delta^1\text{H}$ | HMBC                | HSQC          | TOCSY           |                                    | NOESY                                          |
|-----------------|-----------------------|--------------|--------------------|---------------------|---------------|-----------------|------------------------------------|------------------------------------------------|
|                 |                       |              |                    |                     |               | 20 ms           | 100 ms                             |                                                |
| C2/6            | 52.83                 | H2           | 4.25               | C2/6-H7<br>C2/6-H14 | C2-H2         | H2-H6<br>H2-H14 | H2-H6<br>H2-H14                    | H2-H6<br>H2-H14<br>H2-H9/13<br>H2-H11<br>H2-H7 |
| C3/5            | 135.08                | -            | -                  | C3/5-H9/13          | -             | -               | -                                  | -                                              |
| C4              | 187.52                | H6           | 3.93               | -                   | C6-H6         | H6-H14          | H6-H14                             | H6-H14<br>H6-H9/13<br>H6-H11                   |
| C7              | 65.97                 | H7           | 4.05               | C7-H2               | C7-H7         | -               | -                                  | H7-H9/13                                       |
| C8              | 128.57                | -            | -                  | C8-H9/13            | -             | -               | -                                  | -                                              |
| C9/13           | 131.74                | H9/13        | 7.43               | C9/13-H7            | C9/13-H9/13   | H9/13-H10/12    | H9/13-H10/12                       | H9/13-H10/12<br>H9/13-H24                      |
| C10/12          | 115.26                | H10/12       | 6.96               | -                   | C10/12-H10/12 | -               | -                                  | -                                              |
| C11             | 163.61                | -            | -                  | -                   | -             | -               | -                                  | -                                              |
| C14             | 136.78                | H14          | 7.78               | C14-H16/20          | C14-H14       | -               | H14-H16/20<br>H14-H18<br>H14-H9/13 | H14-H16/20                                     |
| C15             | 130.33                | -            | -                  | C15-H9/13           | -             | -               | -                                  | -                                              |
| C16/20          | 133.11                | H16/20       | 7.34               | C16/20-H2           | -             | -               | H16/20-H2<br>H16/20-H6             | H16/20-H23                                     |
| C17/19          | 115.43                | H17/19       | 7.06               | -                   | C17/19-H17/19 | -               | -                                  | -                                              |
| C18             | 129.11                | H18          | 7.39               | -                   | C18-H18       | -               | -                                  | H18-H23                                        |
| C21             | 62.85                 | H21a         | 3.96               | C21-H23             | C21-H21a      | H21a-H23        | H21a-H23                           | H21a-H23                                       |

|     |       |      |      |         |          |                       |                       |                       |
|-----|-------|------|------|---------|----------|-----------------------|-----------------------|-----------------------|
|     |       | H21b | 3.88 | -       | C21-H21b | -                     | -                     | -                     |
| C22 | 62.58 | H22a | 3.83 | C22-H24 | C22-H22a | H22a-H22b<br>H22a-H24 | H22a-H22b<br>H22a-H24 | H22a-H22b<br>H22a-H24 |
|     |       | H22b | 3.60 | -       | C22-H22b | H22b-H24              | H22b-H24              | H22b-H24              |
| C23 | 16.29 | H23  | 1.09 | C23-H24 | C23-H23  | -                     | -                     | -                     |
| C24 | 16.15 | H24  | 0.99 | C24-H23 | C24-H24  | -                     | -                     | -                     |

**Table S3.** Spatial structure of the conformers of *compound 1*, determined from quantum chemical calculations

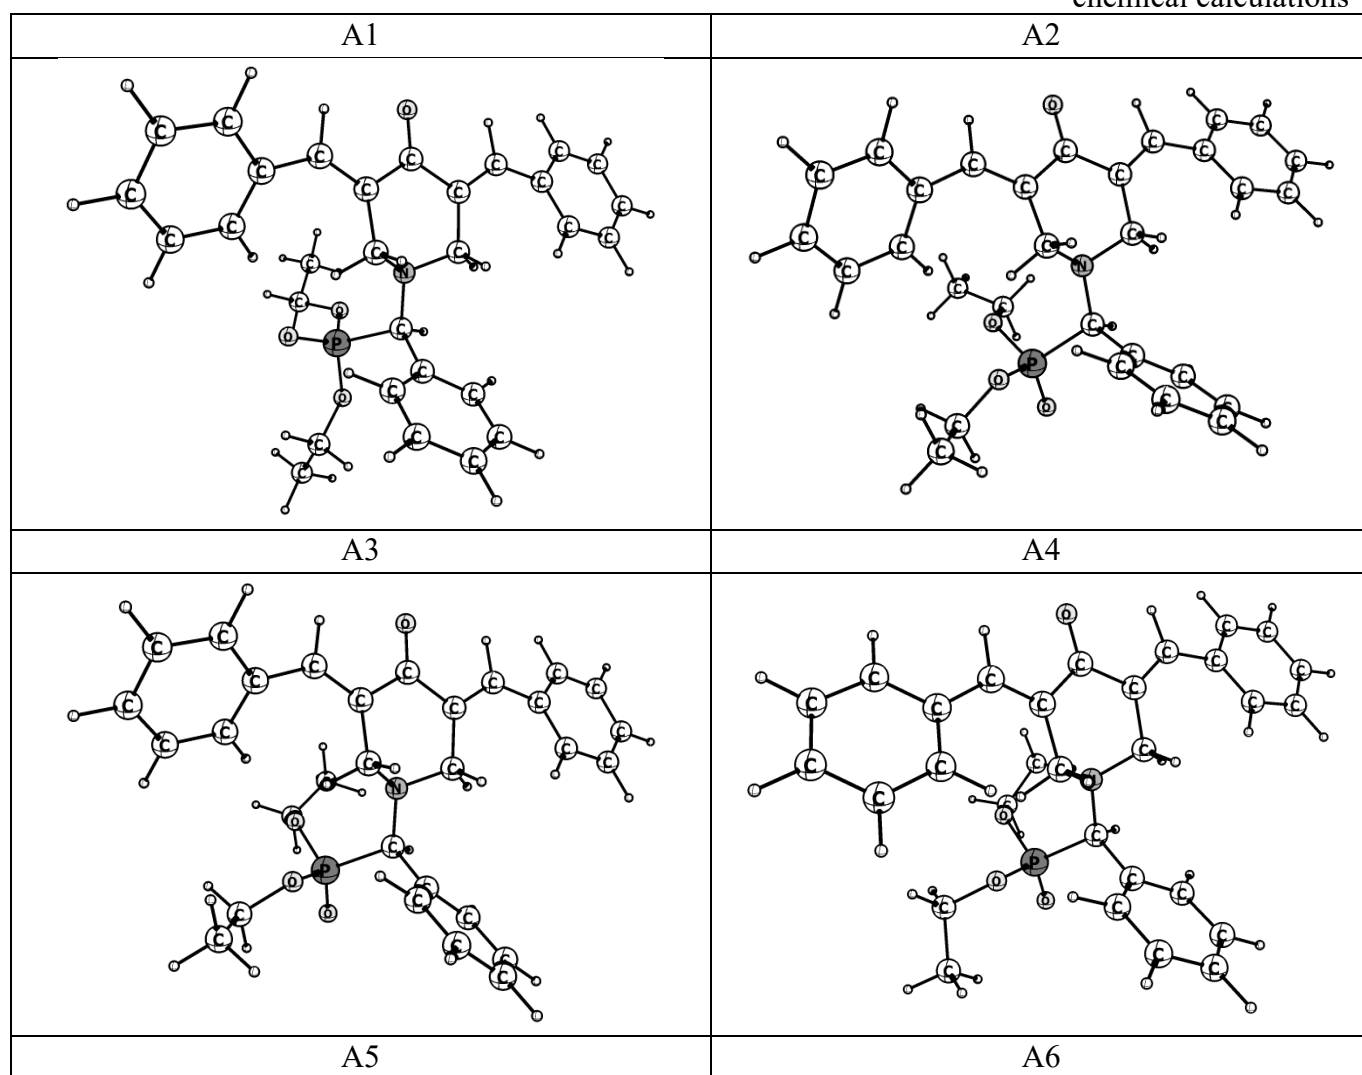

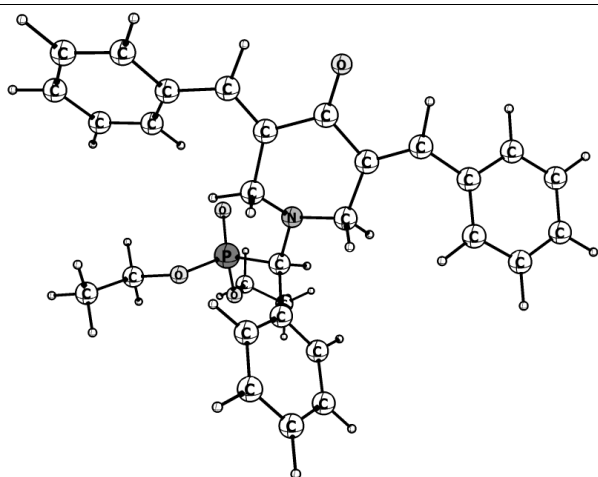

A7

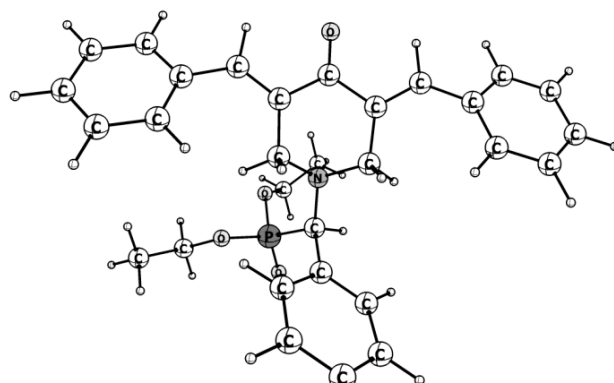

A8

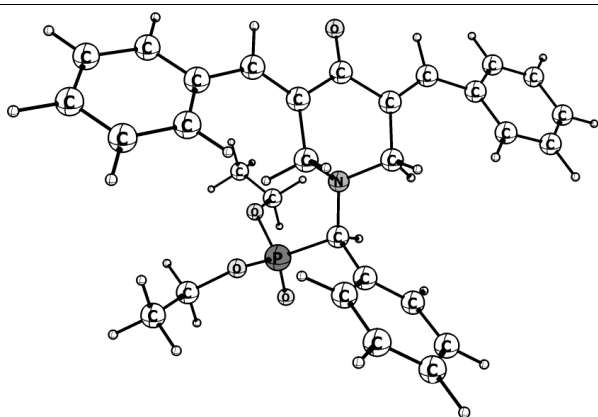

A9

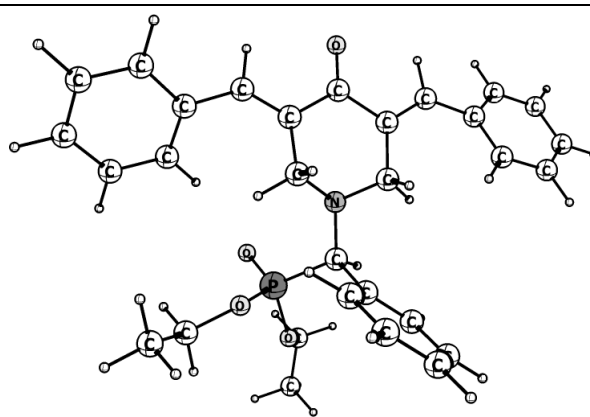

A10

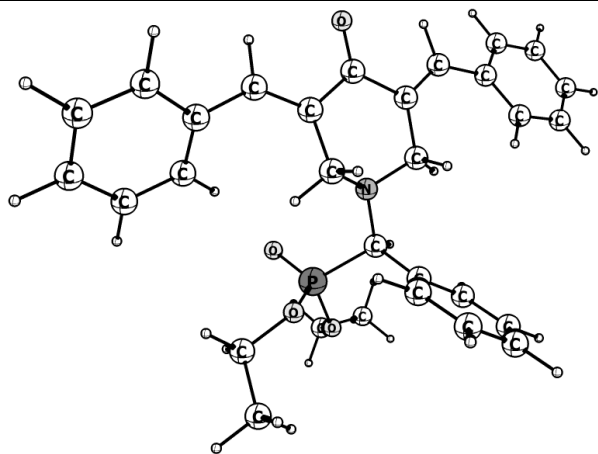

A11

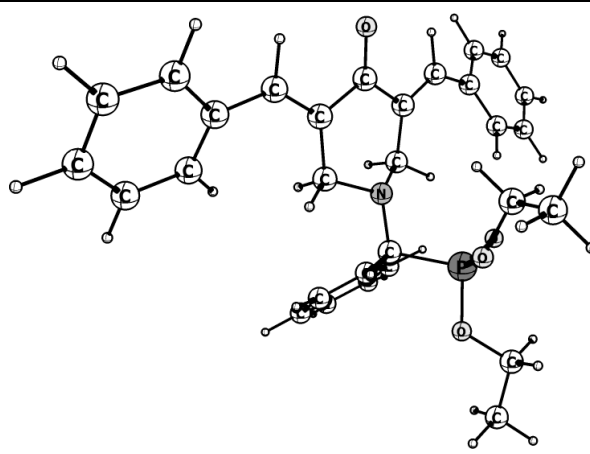

A12

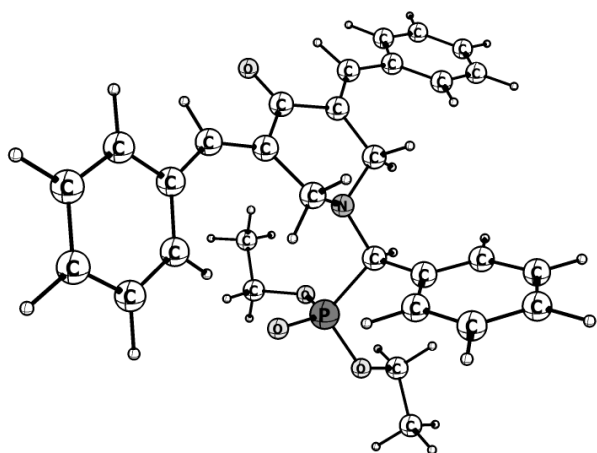

A13

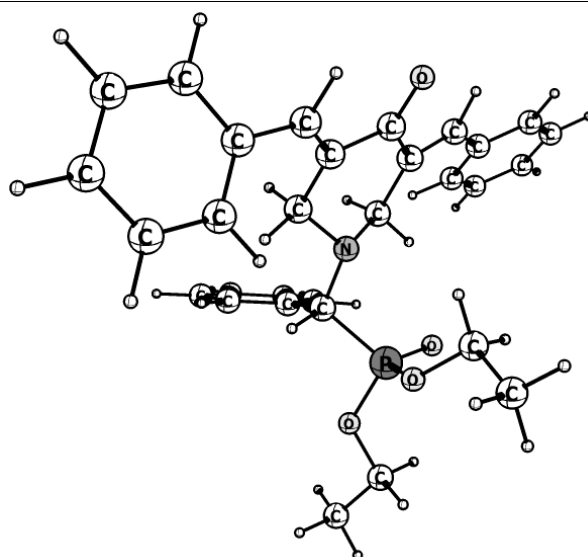

A14

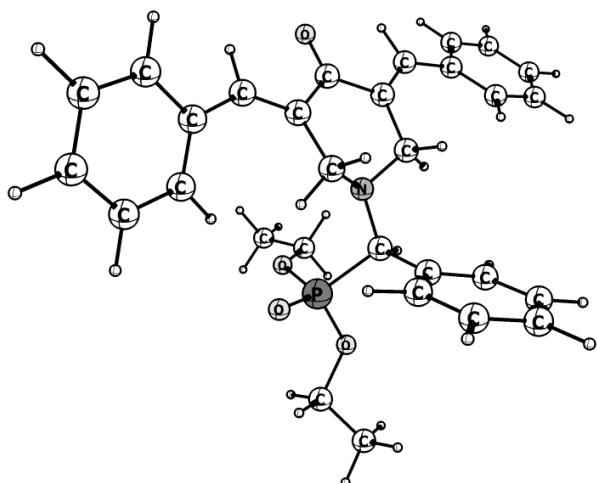

A15

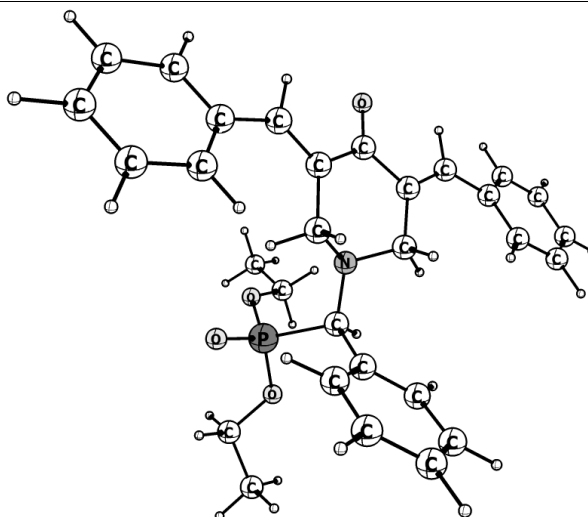

A16

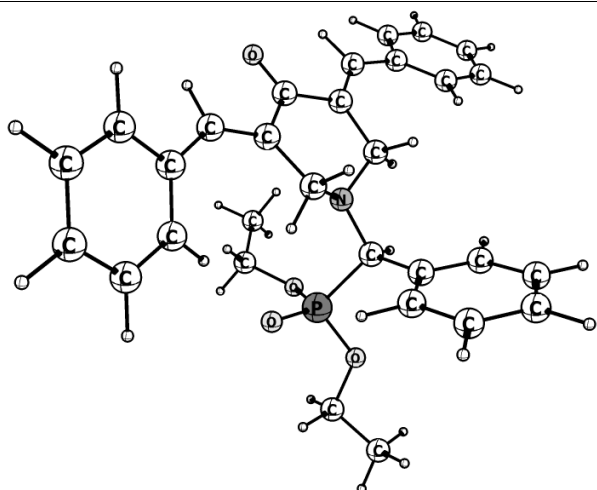

A17

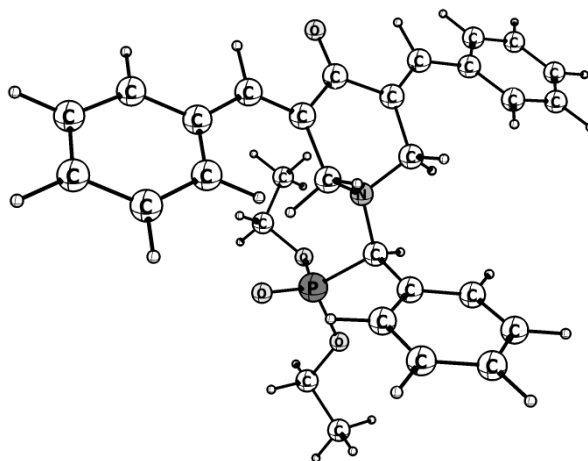

A18

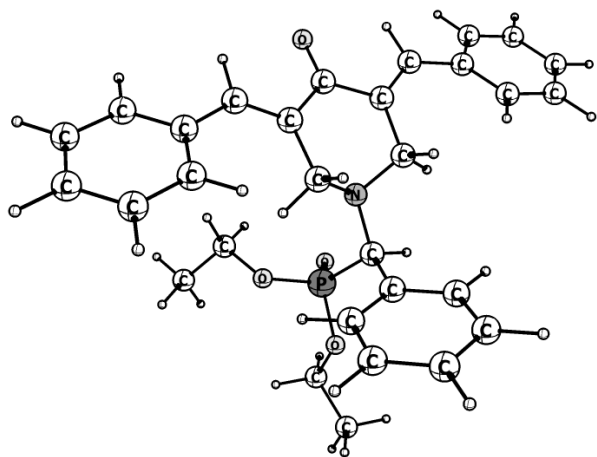

A19

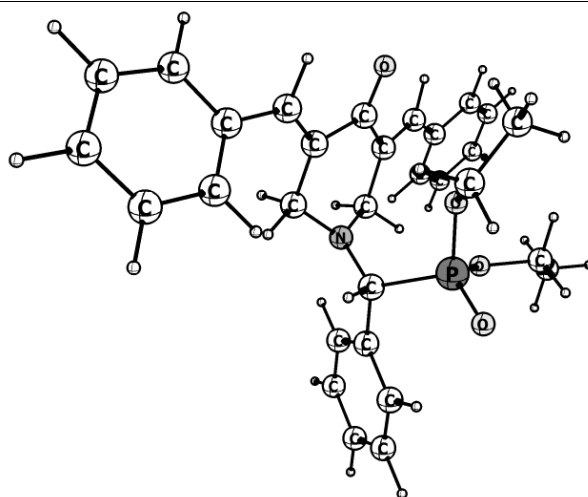

A20

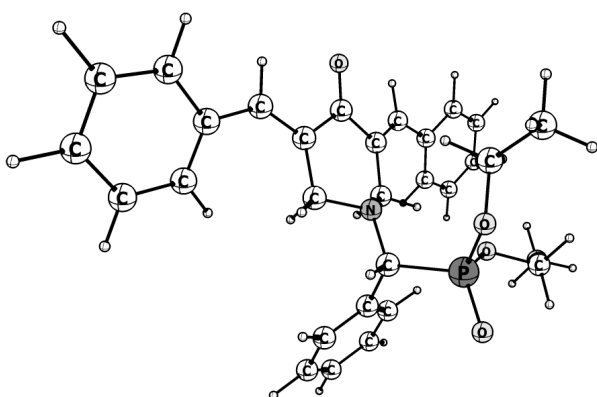

A21

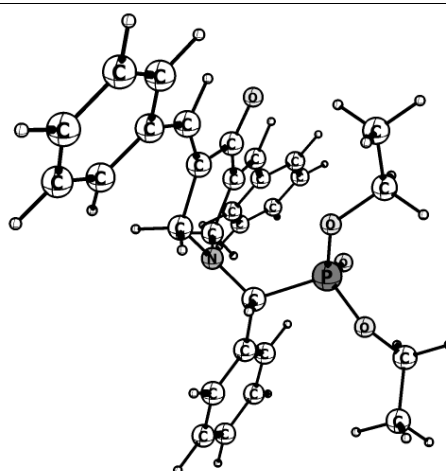

A22

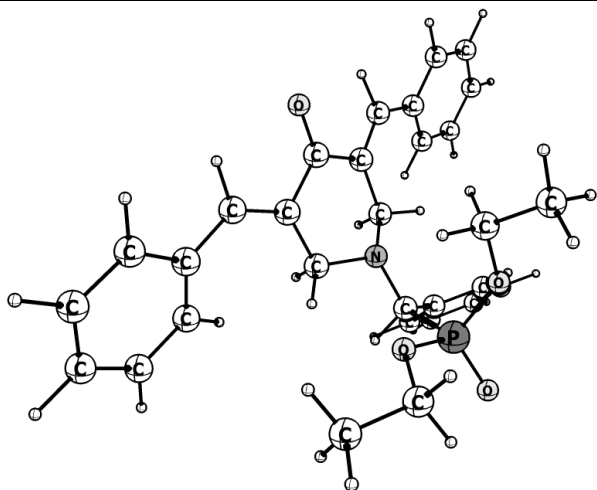

A23

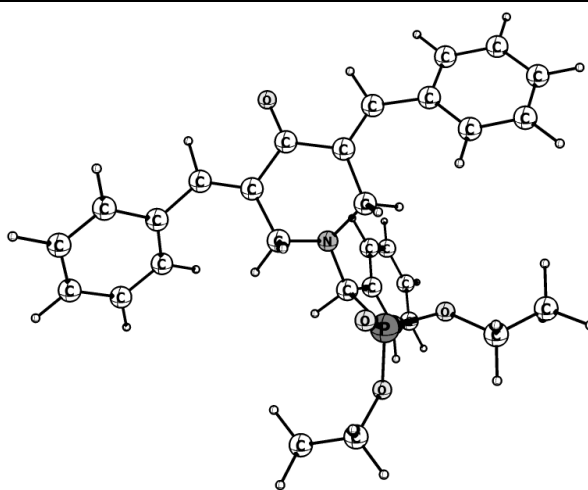

A24



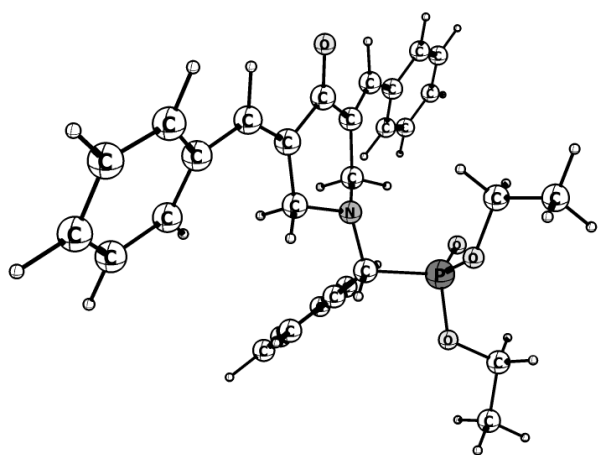

A25

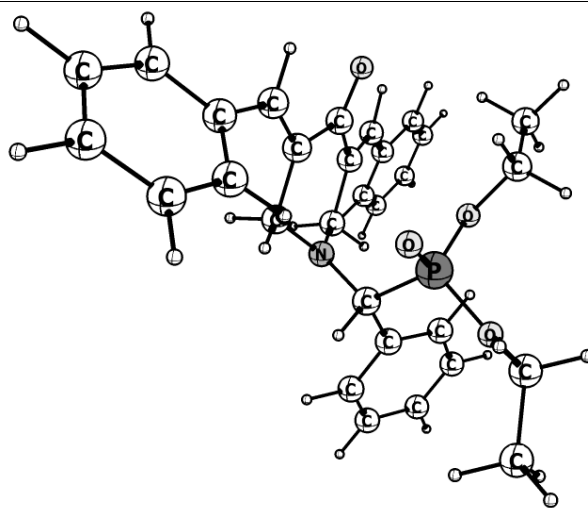

A26

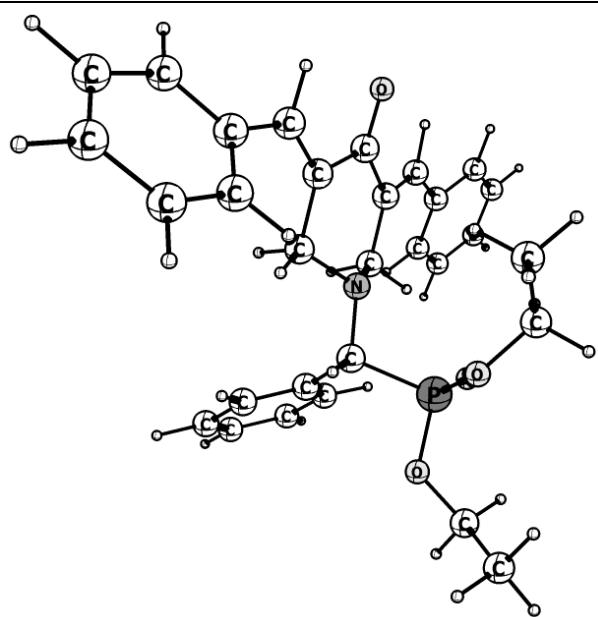

A27

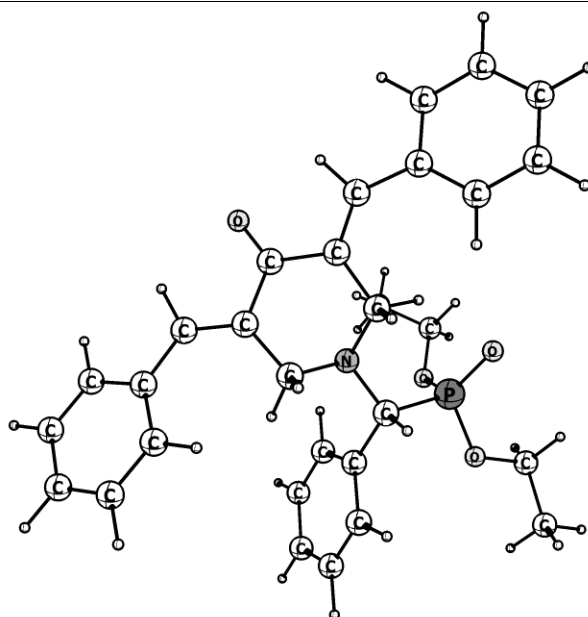

A28

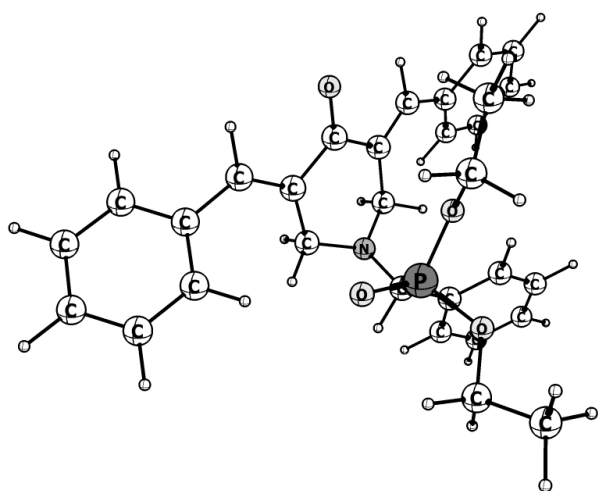

A29

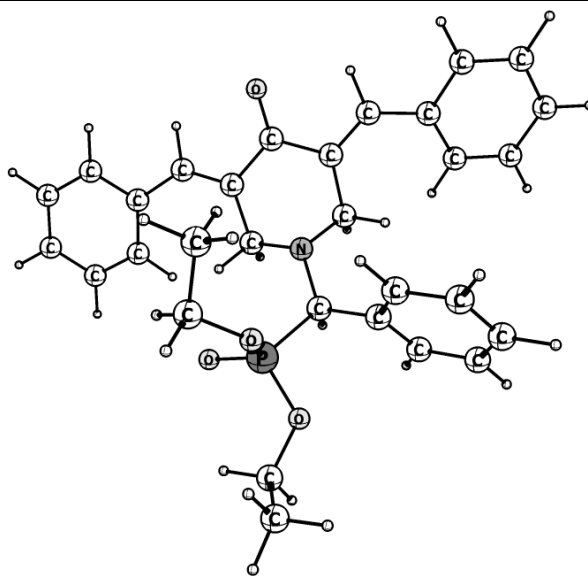

A30

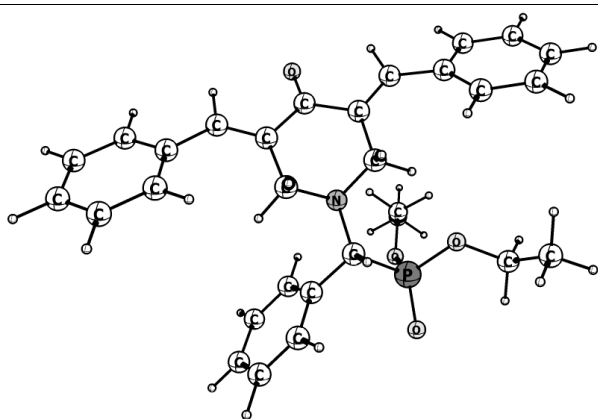

A31

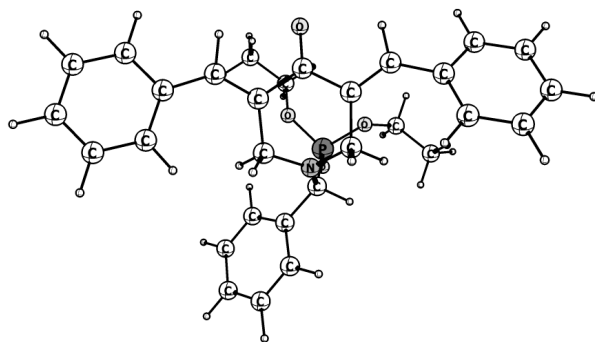

A32

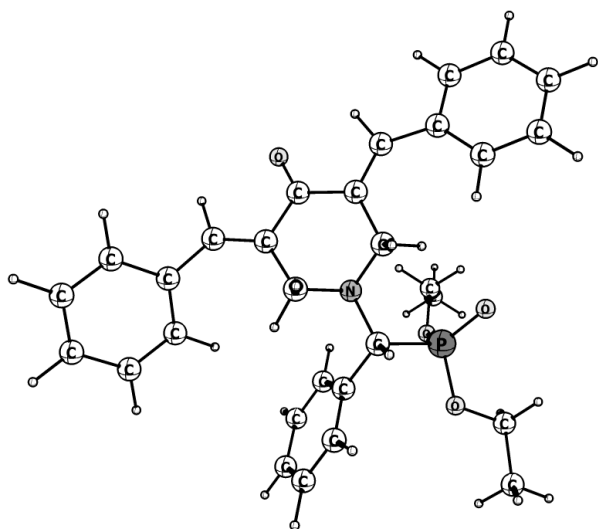

A33

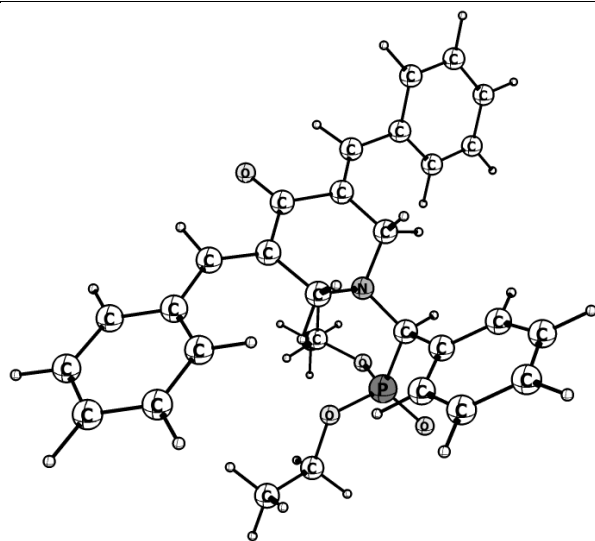

A34

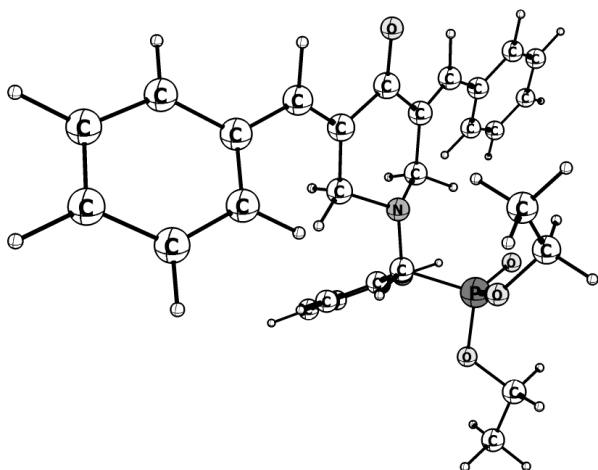

A35

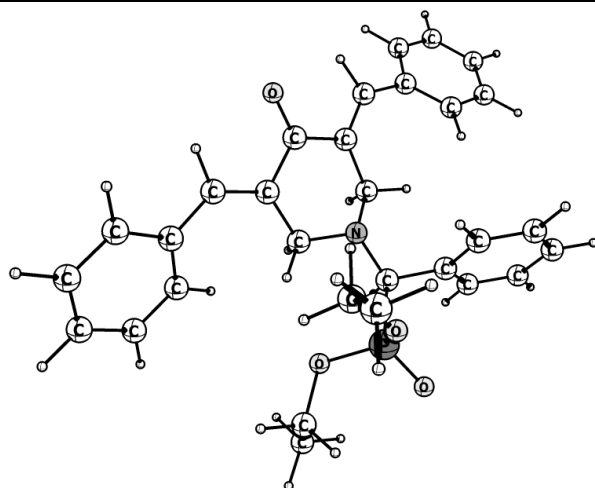

A36

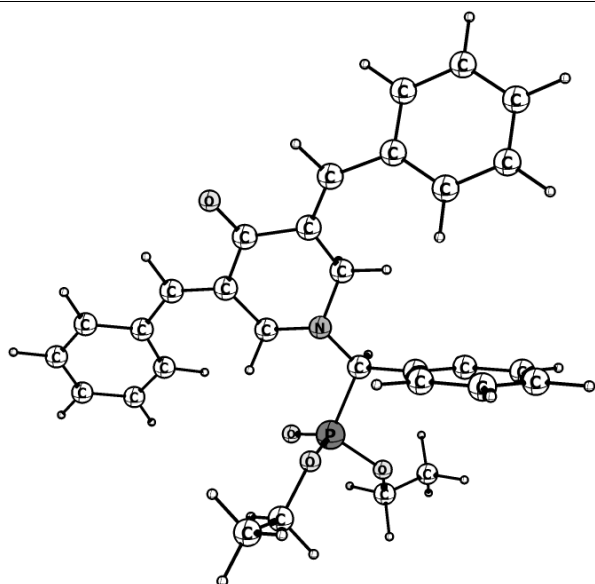

A37

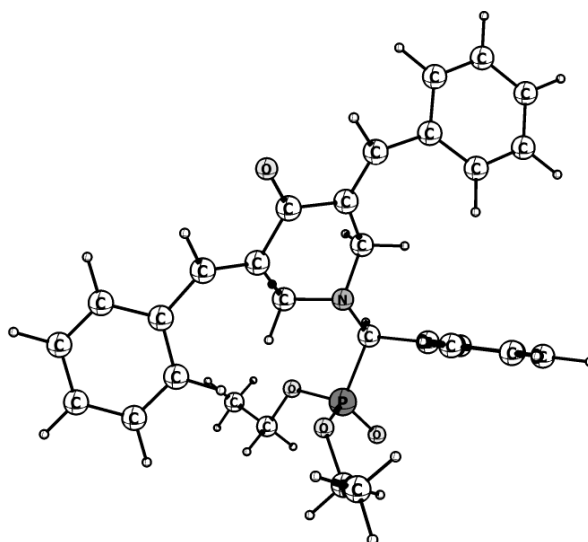

A38

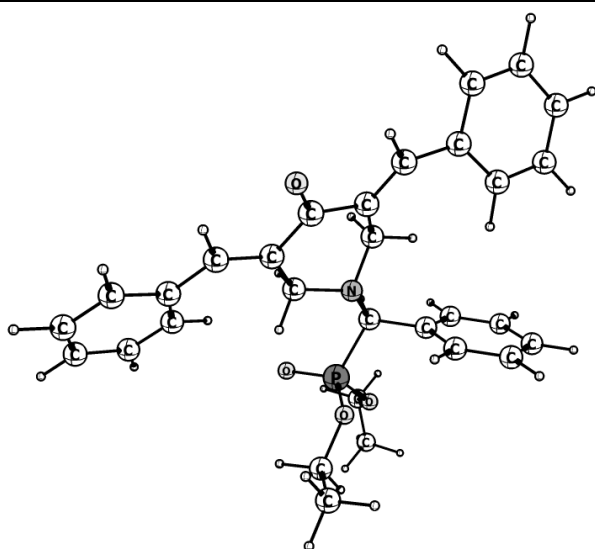

A39

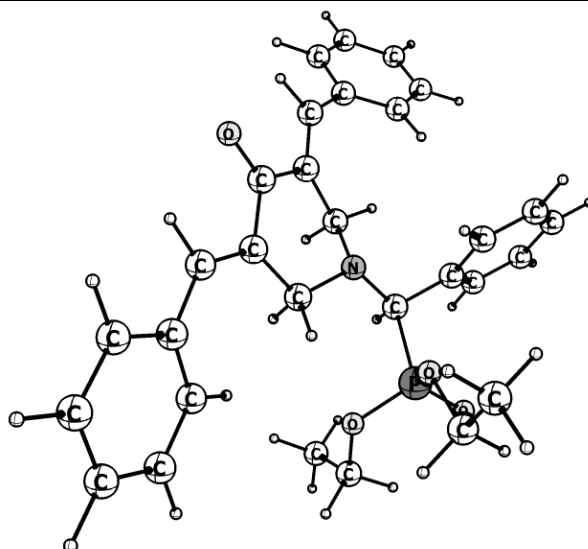

A40

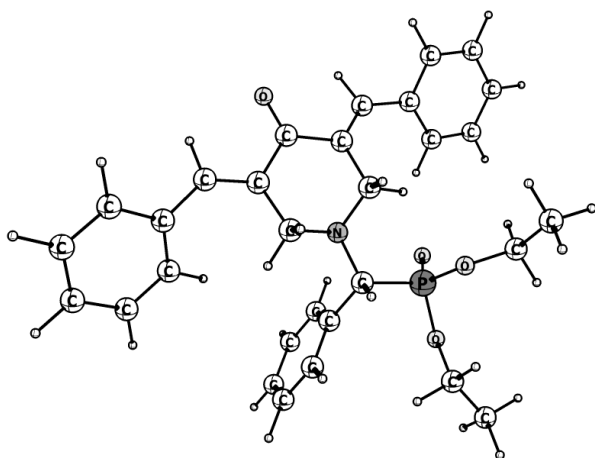

A41

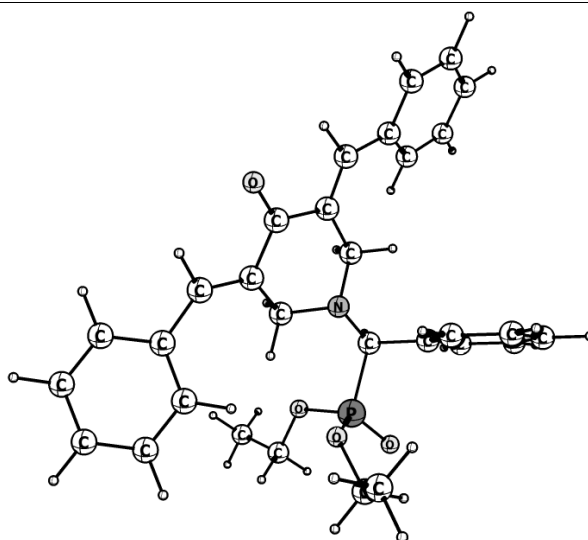

A42

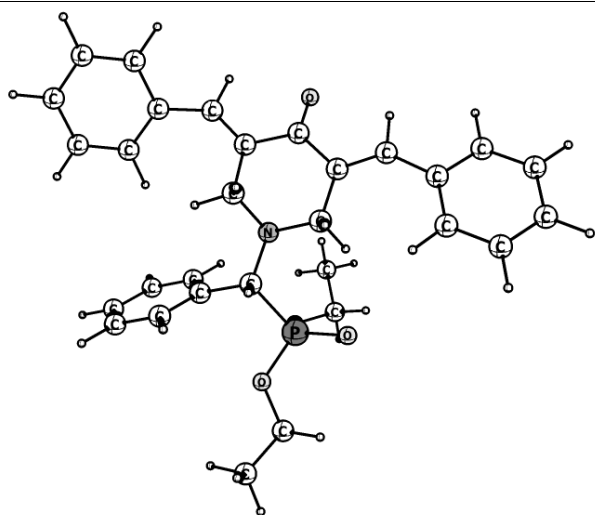

A43

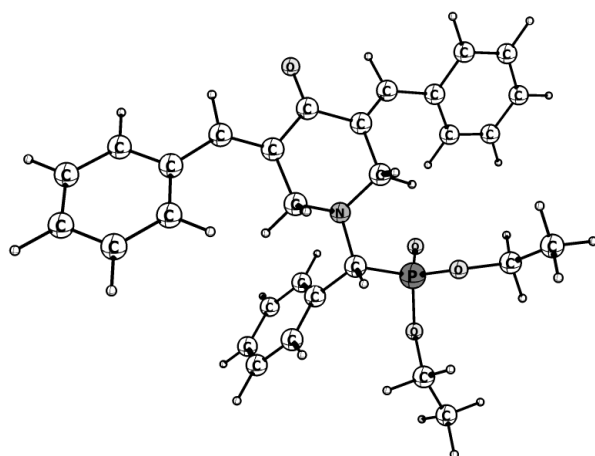

A44

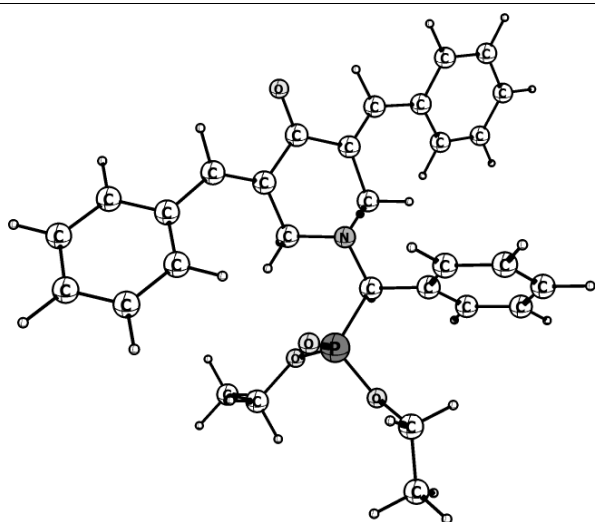

A45

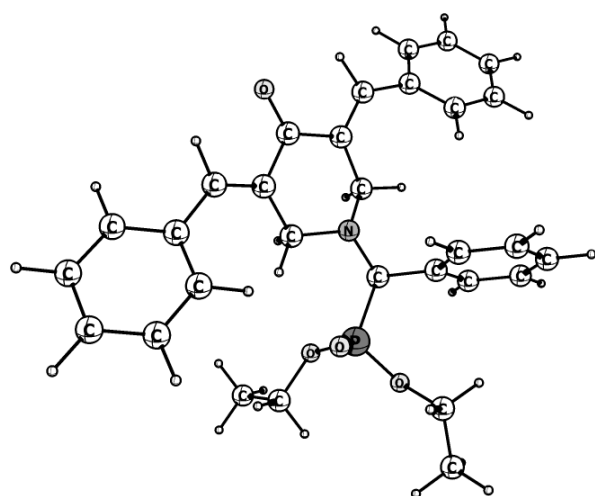

B1

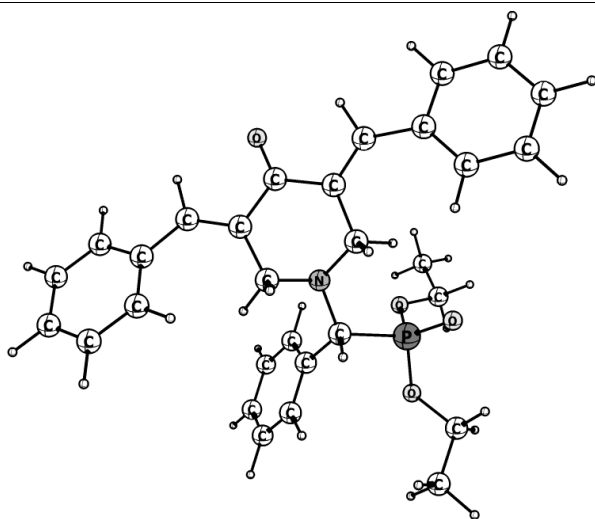

B2

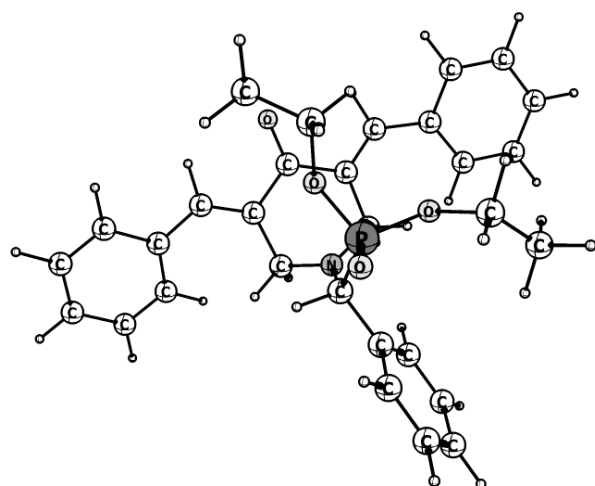

B3

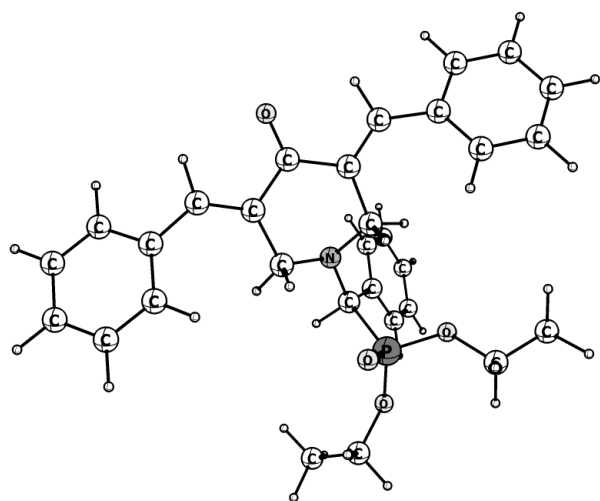

B4

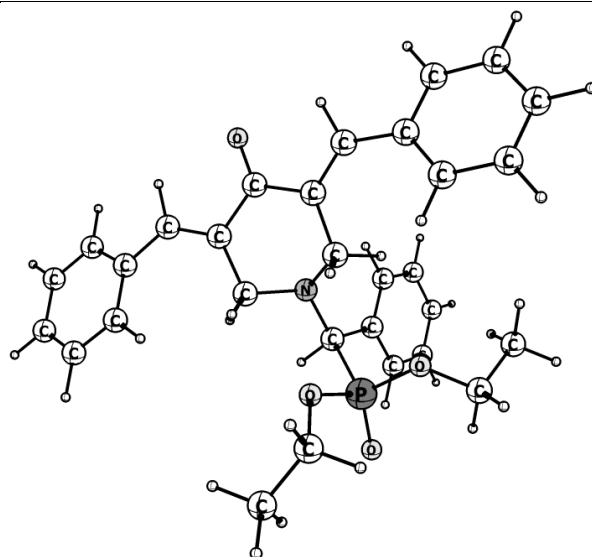

B5

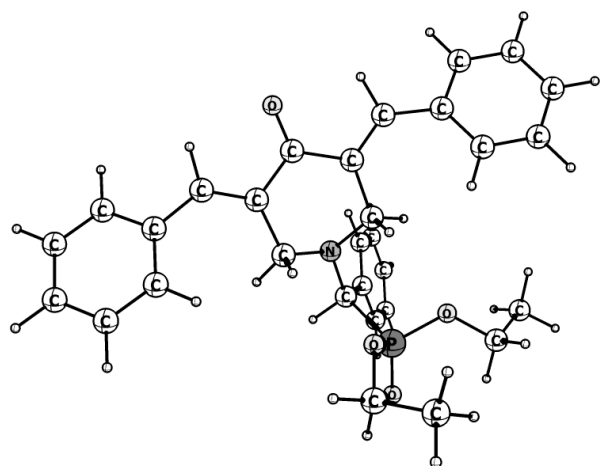

B6

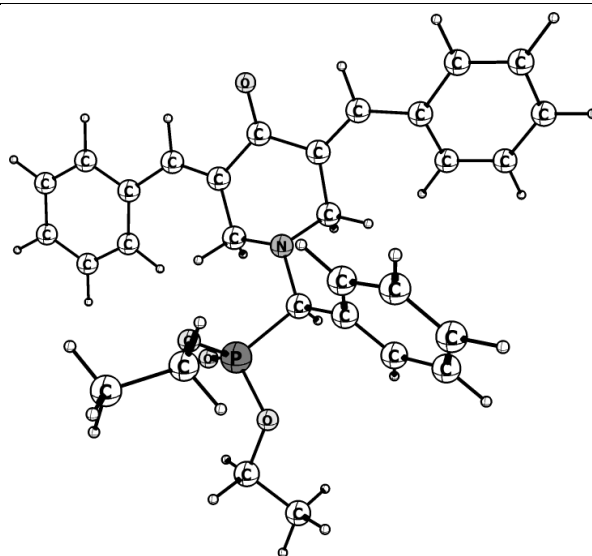

B7

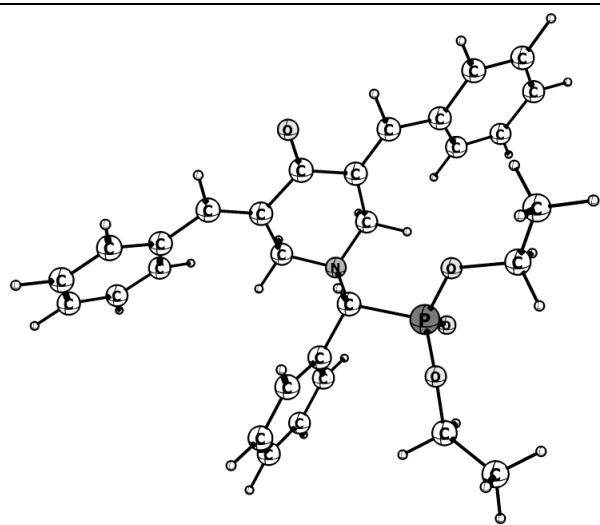

B8

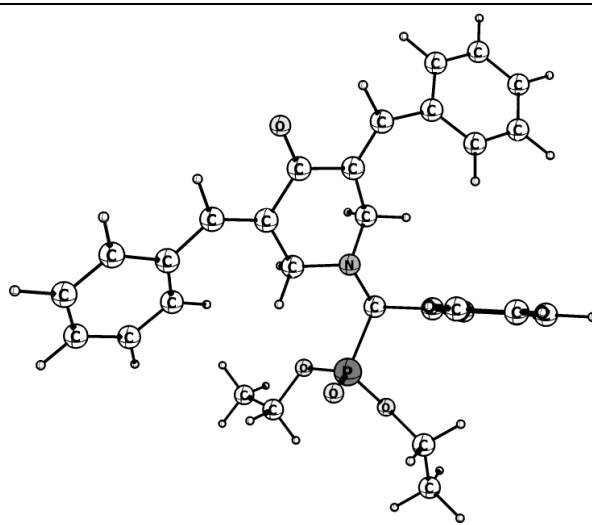

B9

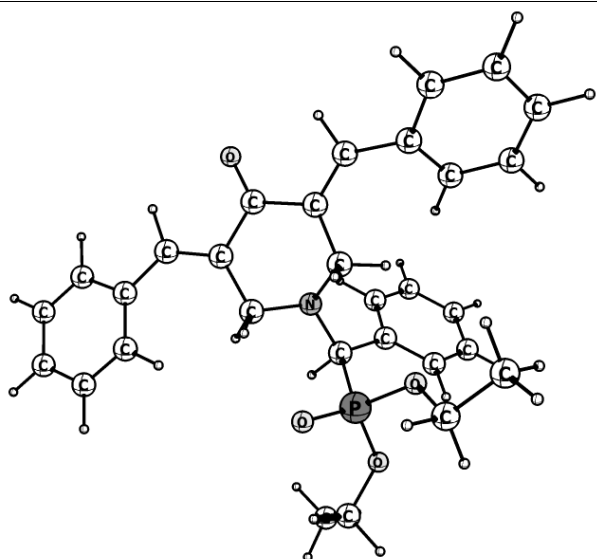

B10

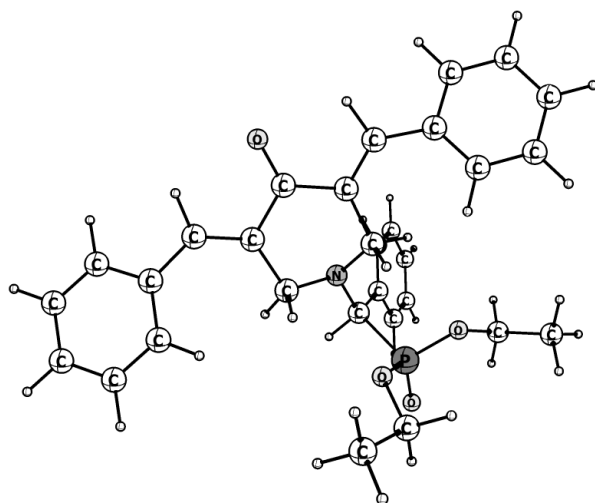

B11

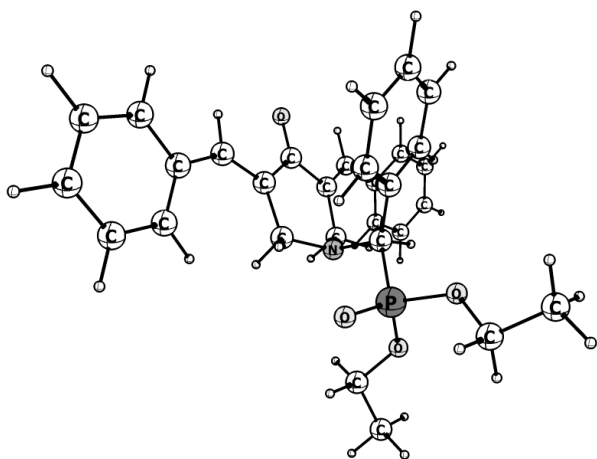

B12

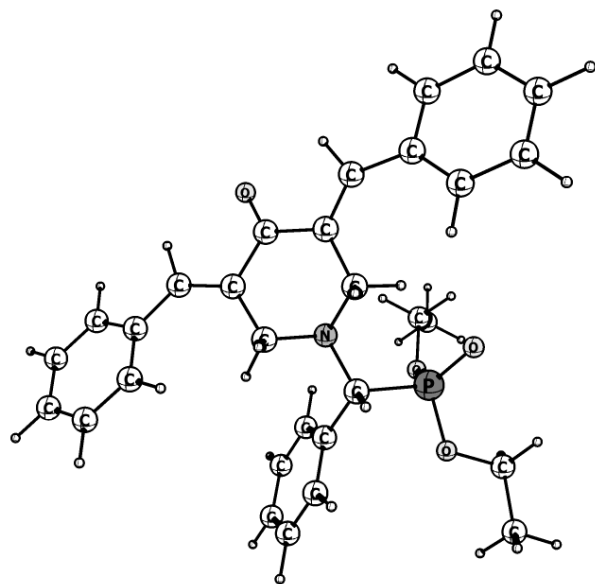

B13

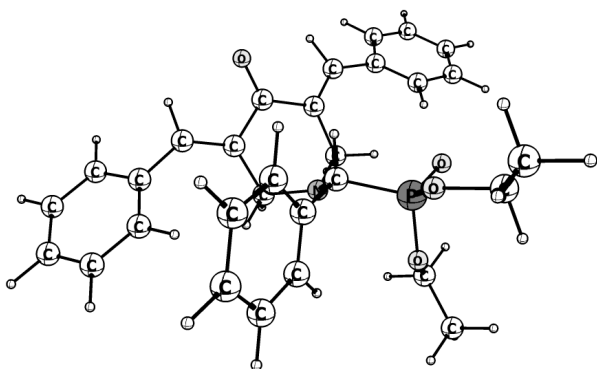

B14

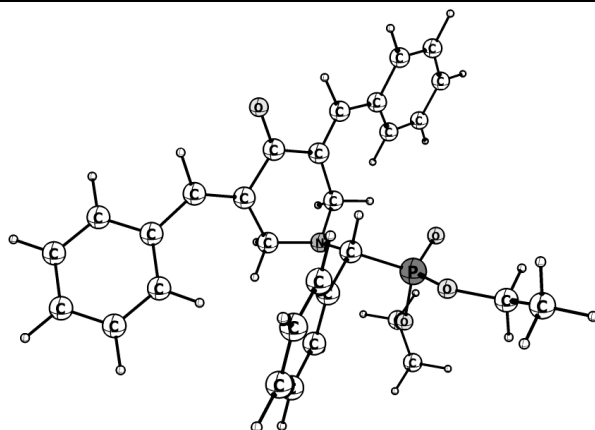

B15

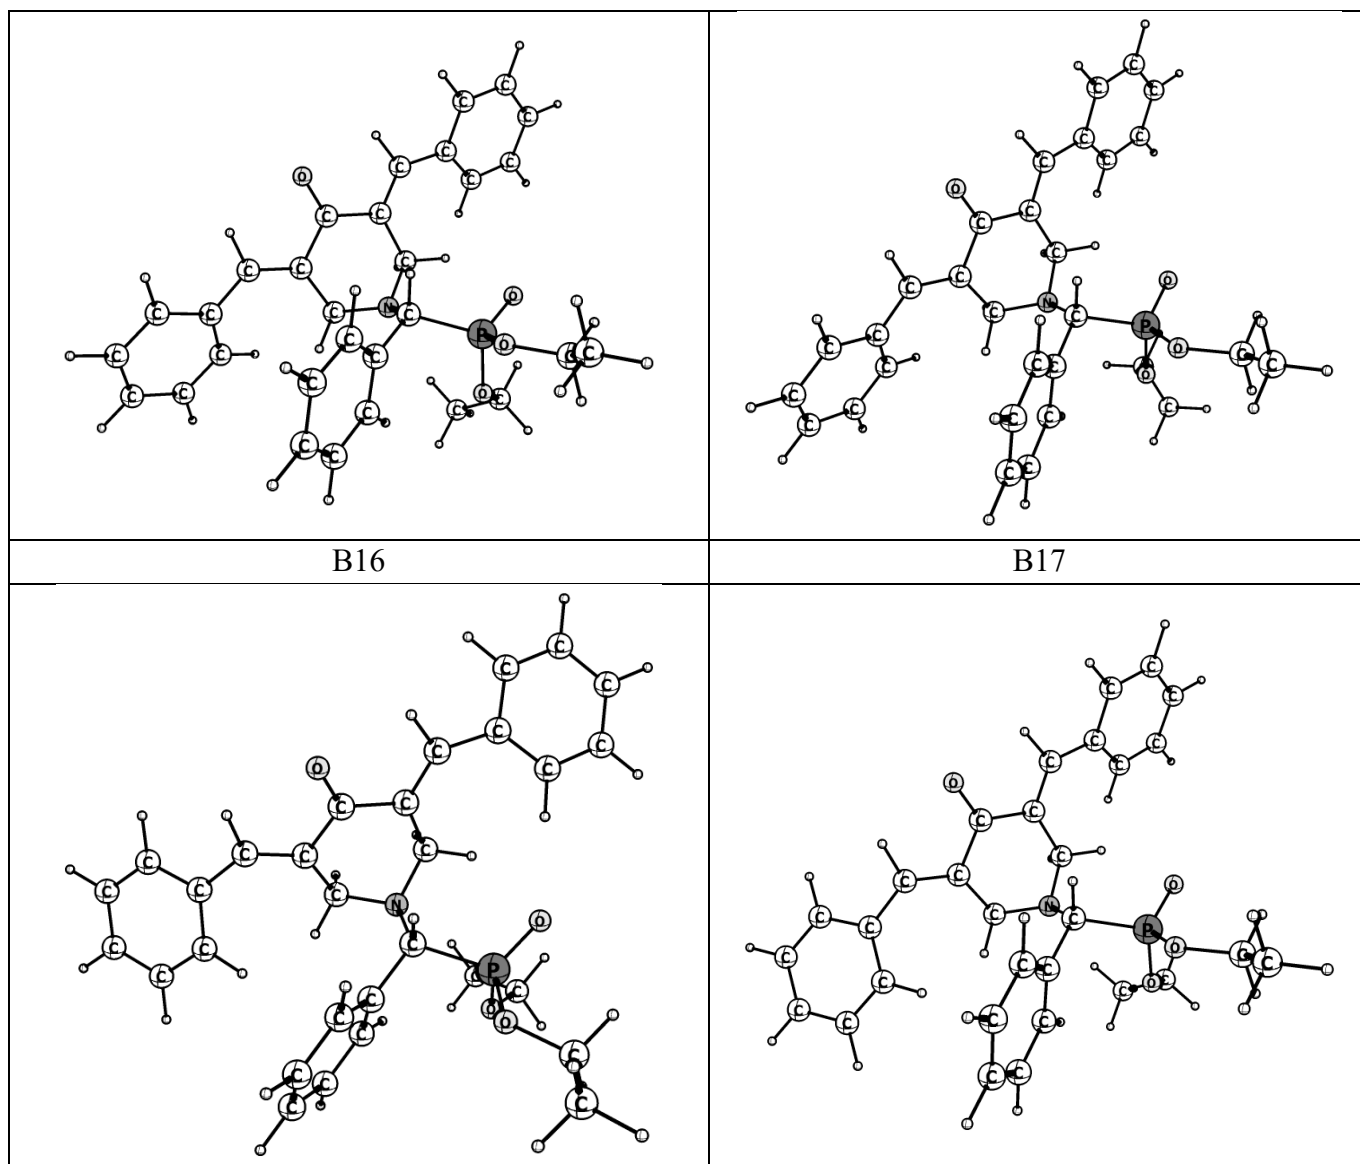

**Table S4.** Spatial structure of the conformers of *compound 2*, determined from quantum chemical calculations

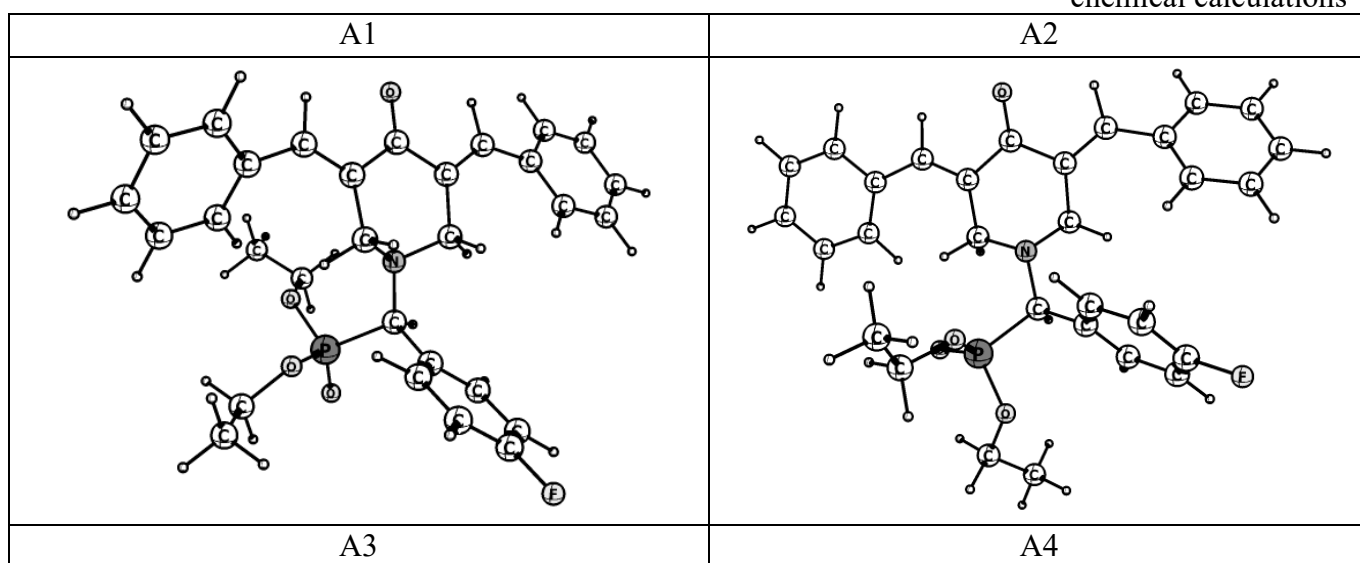

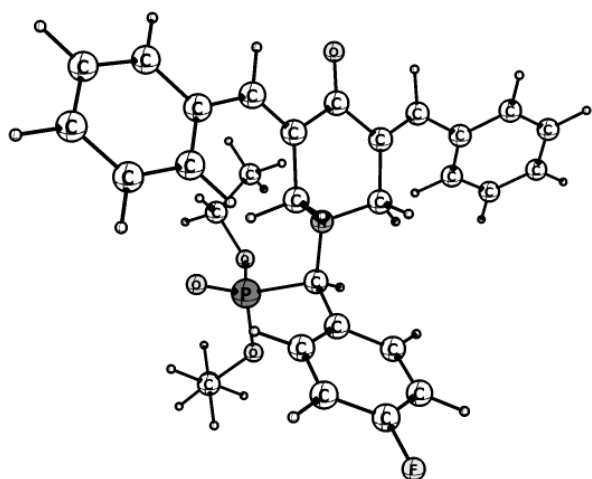

A5

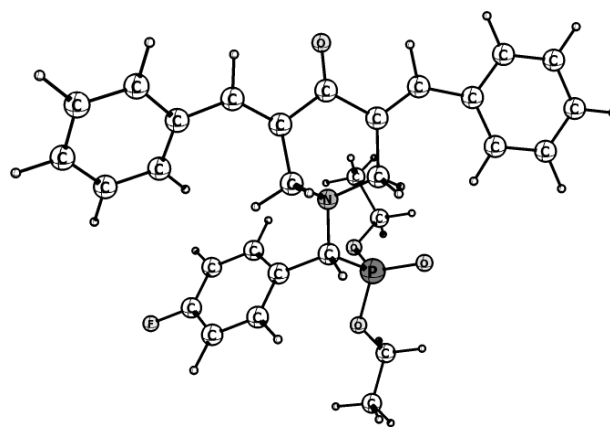

A6

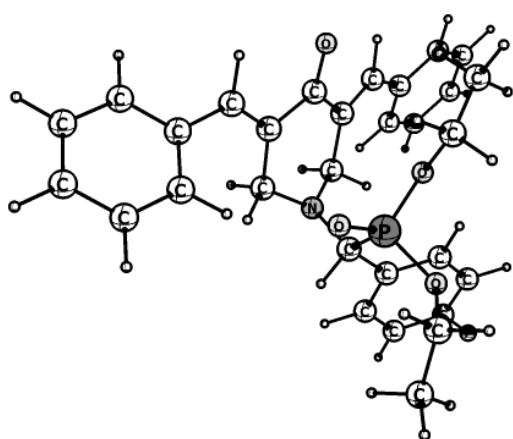

A7

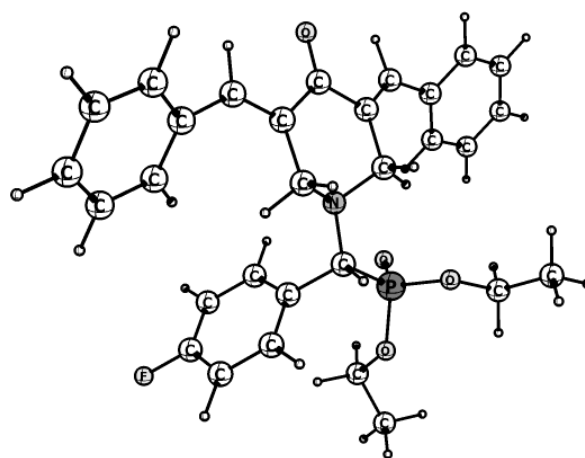

A8

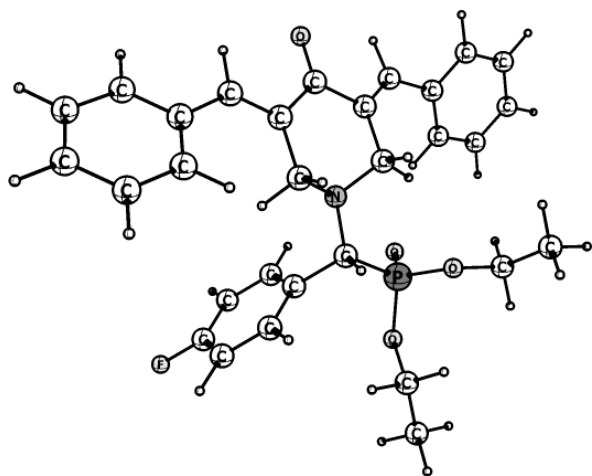

A9

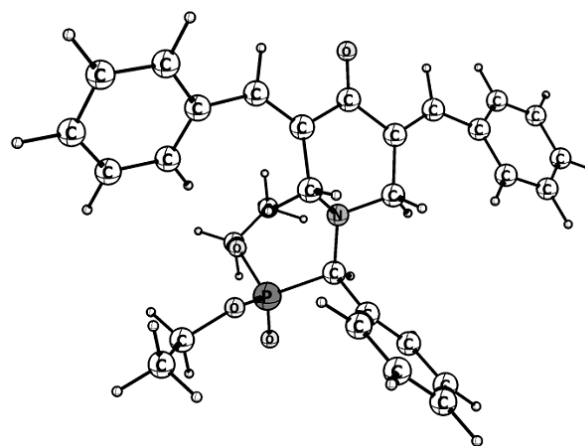

A10



|                                                                                                                                                                                                                                                                                                                                                                                                                                                                 |                                                                                                                                                                                                                                                                                                                                                                                                                                                                  |
|-----------------------------------------------------------------------------------------------------------------------------------------------------------------------------------------------------------------------------------------------------------------------------------------------------------------------------------------------------------------------------------------------------------------------------------------------------------------|------------------------------------------------------------------------------------------------------------------------------------------------------------------------------------------------------------------------------------------------------------------------------------------------------------------------------------------------------------------------------------------------------------------------------------------------------------------|
| 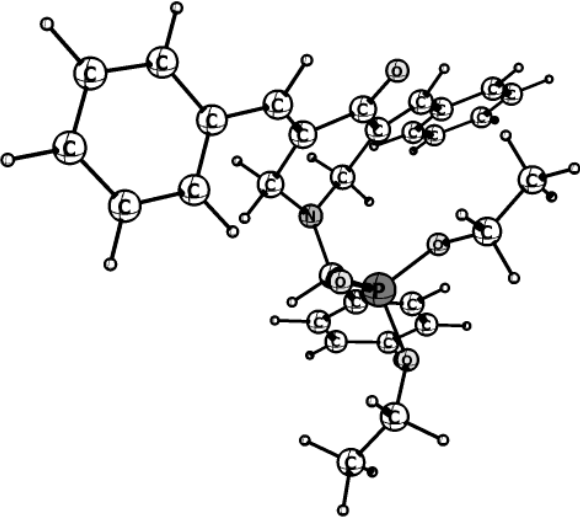 <p>ORTEP diagram of molecule A11, showing a complex organic structure with a central phosphorus atom (P) bonded to two oxygen atoms (O) and two carbon atoms (C). The structure includes several fused and linked rings, with carbon atoms labeled C1 through C18 and oxygen atoms labeled O1 through O4. Hydrogen atoms are shown as small spheres of arbitrary radii.</p>   |  <p>ORTEP diagram of molecule A12, showing a complex organic structure with a central phosphorus atom (P) bonded to two oxygen atoms (O) and two carbon atoms (C). The structure includes several fused and linked rings, with carbon atoms labeled C1 through C18 and oxygen atoms labeled O1 through O4. Hydrogen atoms are shown as small spheres of arbitrary radii.</p>   |
| A11                                                                                                                                                                                                                                                                                                                                                                                                                                                             | A12                                                                                                                                                                                                                                                                                                                                                                                                                                                              |
|  <p>ORTEP diagram of molecule A13, showing a complex organic structure with a central phosphorus atom (P) bonded to two oxygen atoms (O) and two carbon atoms (C). The structure includes several fused and linked rings, with carbon atoms labeled C1 through C18 and oxygen atoms labeled O1 through O4. Hydrogen atoms are shown as small spheres of arbitrary radii.</p>  |  <p>ORTEP diagram of molecule A14, showing a complex organic structure with a central phosphorus atom (P) bonded to two oxygen atoms (O) and two carbon atoms (C). The structure includes several fused and linked rings, with carbon atoms labeled C1 through C18 and oxygen atoms labeled O1 through O4. Hydrogen atoms are shown as small spheres of arbitrary radii.</p>  |
| A13                                                                                                                                                                                                                                                                                                                                                                                                                                                             | A14                                                                                                                                                                                                                                                                                                                                                                                                                                                              |
|  <p>ORTEP diagram of molecule A15, showing a complex organic structure with a central phosphorus atom (P) bonded to two oxygen atoms (O) and two carbon atoms (C). The structure includes several fused and linked rings, with carbon atoms labeled C1 through C18 and oxygen atoms labeled O1 through O4. Hydrogen atoms are shown as small spheres of arbitrary radii.</p> |  <p>ORTEP diagram of molecule A16, showing a complex organic structure with a central phosphorus atom (P) bonded to two oxygen atoms (O) and two carbon atoms (C). The structure includes several fused and linked rings, with carbon atoms labeled C1 through C18 and oxygen atoms labeled O1 through O4. Hydrogen atoms are shown as small spheres of arbitrary radii.</p> |
| A15                                                                                                                                                                                                                                                                                                                                                                                                                                                             | A16                                                                                                                                                                                                                                                                                                                                                                                                                                                              |

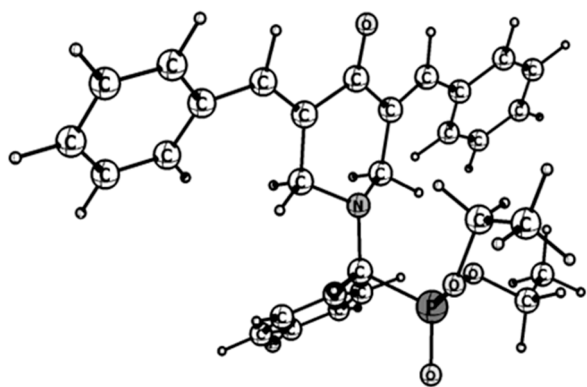

A17

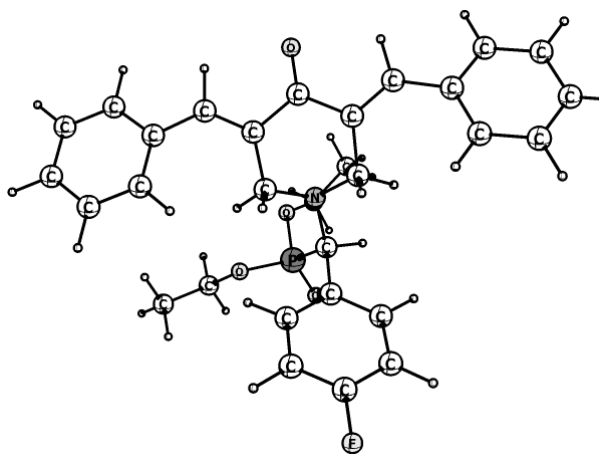

A18

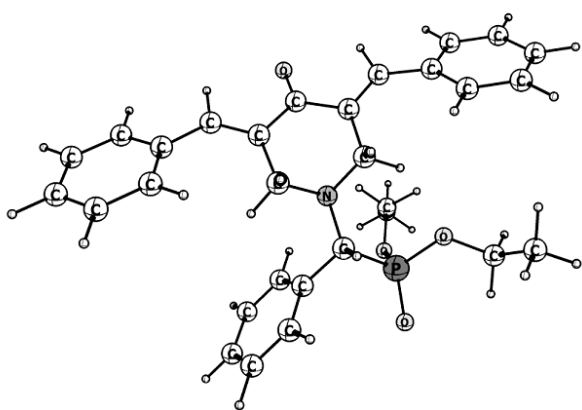

A19

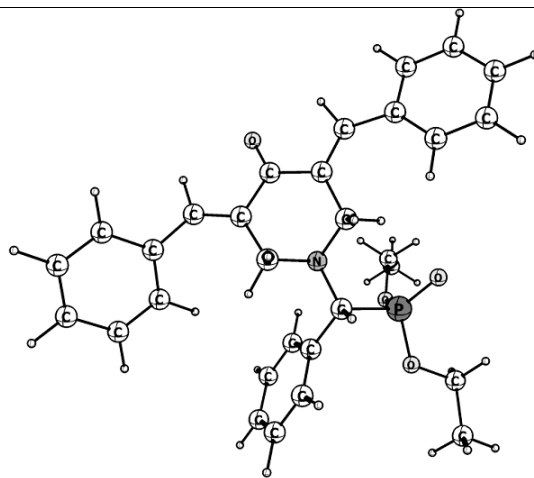

A20

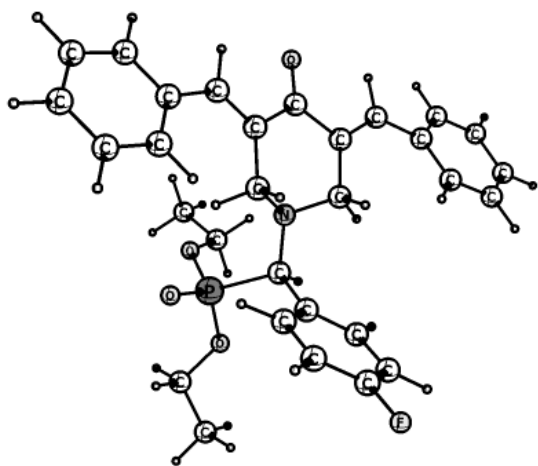

A21

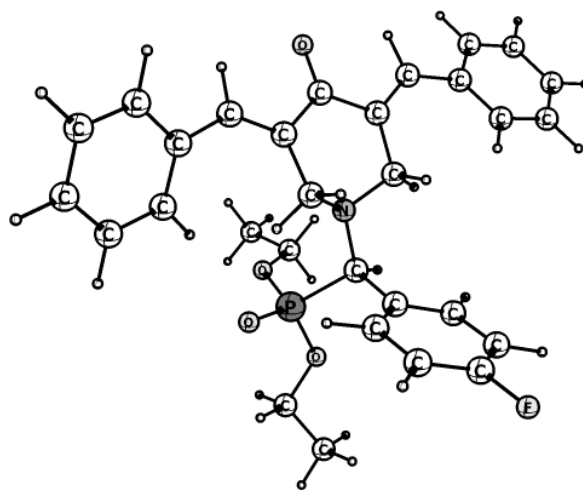

A22

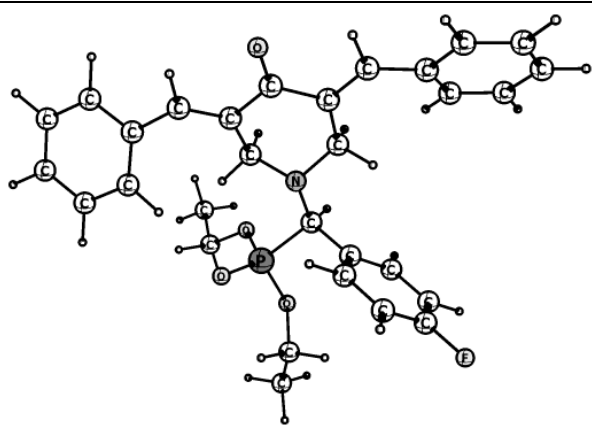

B1

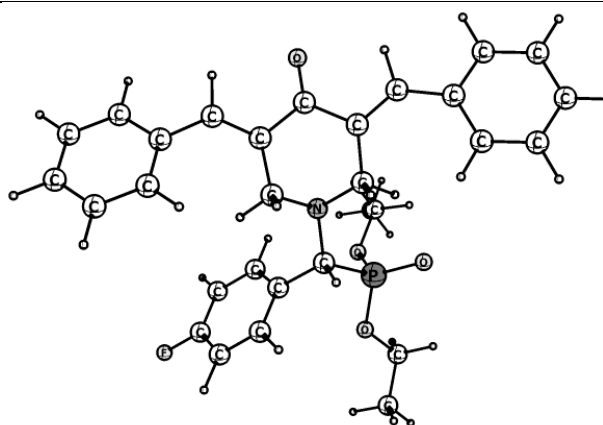

B2

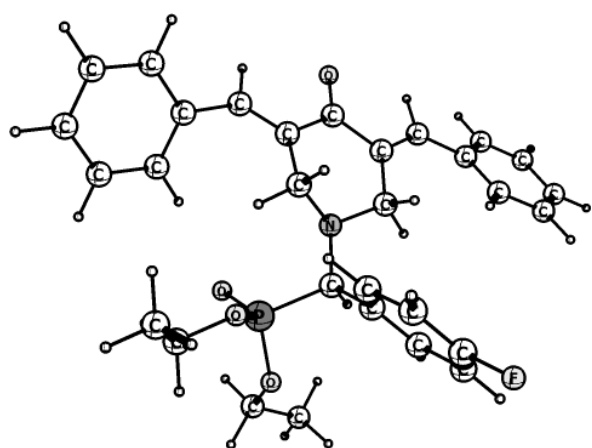

B3

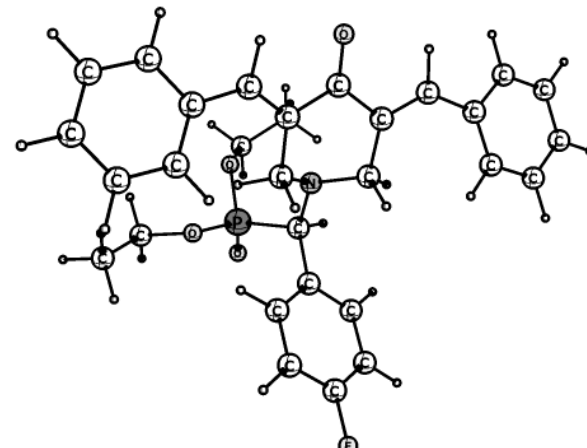

B4

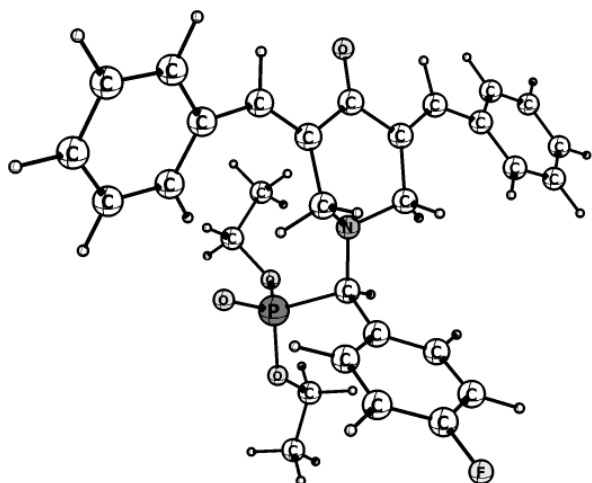

B5

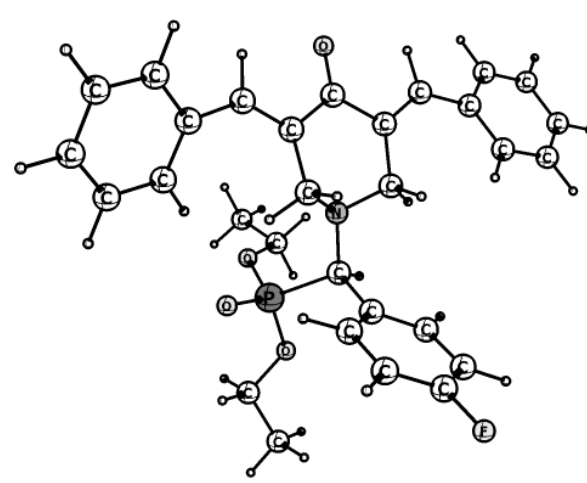

B6

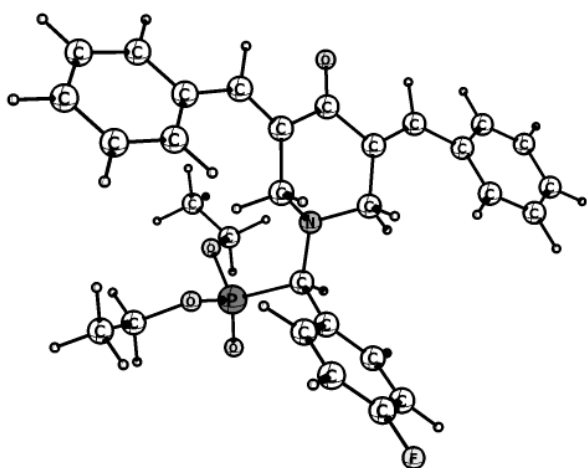

B7

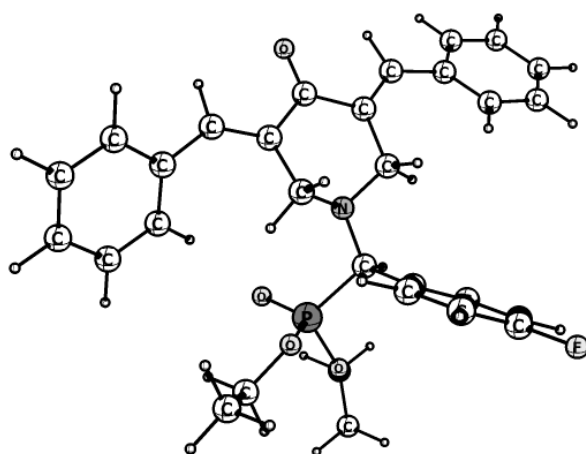

B8

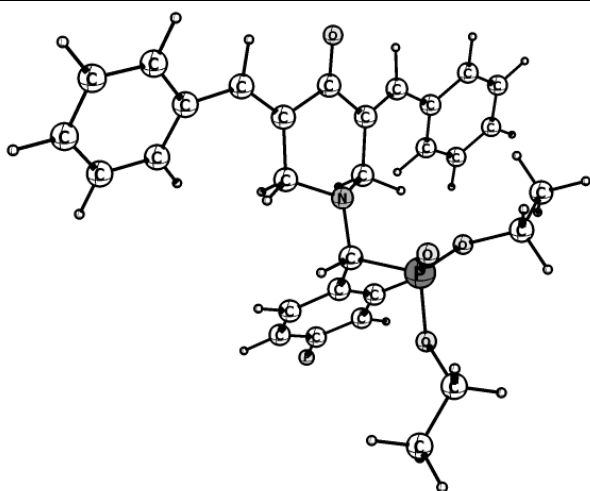

B9

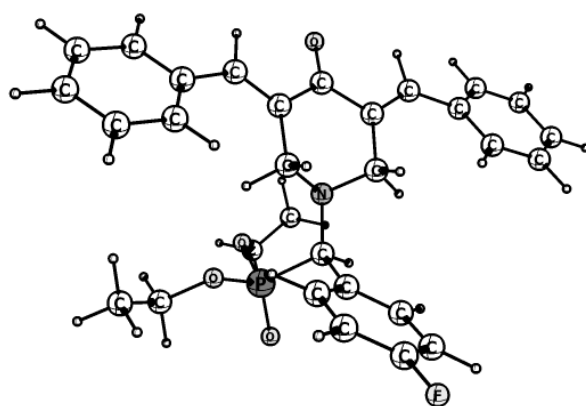

B10

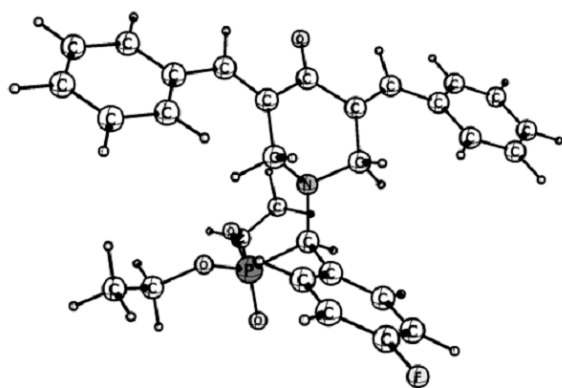

B11

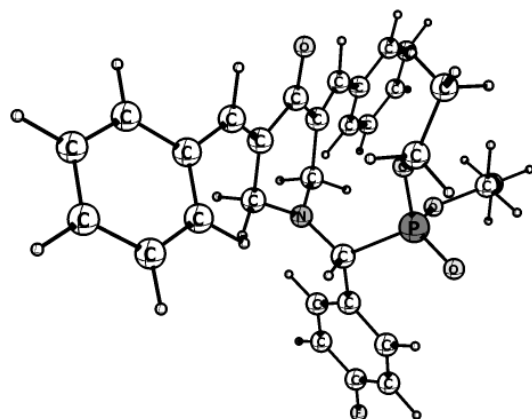

B12

|                                                                                                                                                                                                                                                                                                                               |                                                                                                                                                                                                                                                                                                                                |
|-------------------------------------------------------------------------------------------------------------------------------------------------------------------------------------------------------------------------------------------------------------------------------------------------------------------------------|--------------------------------------------------------------------------------------------------------------------------------------------------------------------------------------------------------------------------------------------------------------------------------------------------------------------------------|
| 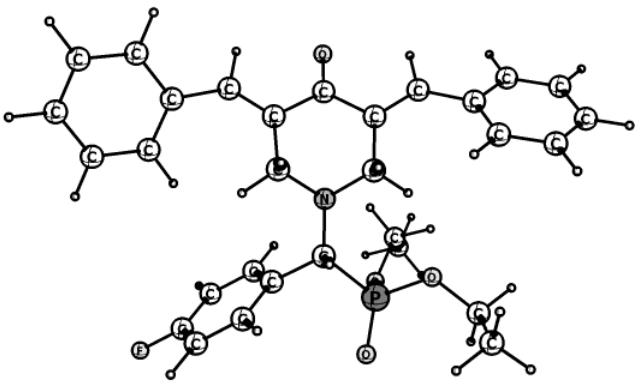 <p>ORTEP diagram of compound B13, showing a complex organic structure with multiple fused and linked rings, including aromatic and heterocyclic systems. The structure is shown with thermal ellipsoids at the 50% probability level.</p>   |  <p>ORTEP diagram of compound B14, showing a complex organic structure with multiple fused and linked rings, including aromatic and heterocyclic systems. The structure is shown with thermal ellipsoids at the 50% probability level.</p>   |
| B13                                                                                                                                                                                                                                                                                                                           | B14                                                                                                                                                                                                                                                                                                                            |
|  <p>ORTEP diagram of compound B15, showing a complex organic structure with multiple fused and linked rings, including aromatic and heterocyclic systems. The structure is shown with thermal ellipsoids at the 50% probability level.</p>  |  <p>ORTEP diagram of compound B16, showing a complex organic structure with multiple fused and linked rings, including aromatic and heterocyclic systems. The structure is shown with thermal ellipsoids at the 50% probability level.</p>  |
| B15                                                                                                                                                                                                                                                                                                                           | B16                                                                                                                                                                                                                                                                                                                            |
|  <p>ORTEP diagram of compound B17, showing a complex organic structure with multiple fused and linked rings, including aromatic and heterocyclic systems. The structure is shown with thermal ellipsoids at the 50% probability level.</p> |  <p>ORTEP diagram of compound B16, showing a complex organic structure with multiple fused and linked rings, including aromatic and heterocyclic systems. The structure is shown with thermal ellipsoids at the 50% probability level.</p> |
| B17                                                                                                                                                                                                                                                                                                                           |                                                                                                                                                                                                                                                                                                                                |
|  <p>ORTEP diagram of compound B17, showing a complex organic structure with multiple fused and linked rings, including aromatic and heterocyclic systems. The structure is shown with thermal ellipsoids at the 50% probability level.</p> |                                                                                                                                                                                                                                                                                                                                |



**Table S5.** Values of dihedral angles, energies and intramolecular distances of the compound 1 molecule in the considered conformers corresponding to typical types of intramolecular motion

| Conformer | Values of the dihedral angle, (°)                                                 |                        | E, kJ/mol | r (H2-H14), Å | r (H6-H9/13), Å |
|-----------|-----------------------------------------------------------------------------------|------------------------|-----------|---------------|-----------------|
|           | 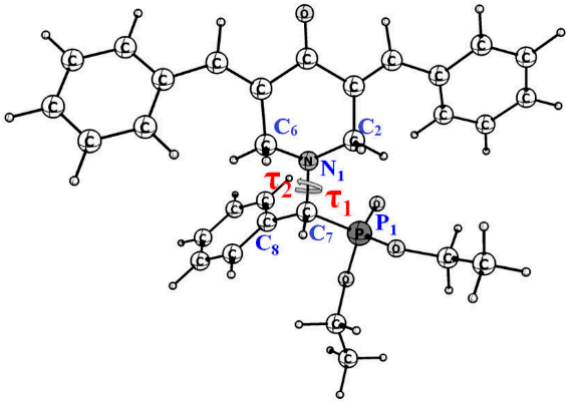 |                        |           |               |                 |
|           | $\tau_1$ (C6-N1-C7-C8)                                                            | $\tau_2$ (C2-N1-C7-P1) |           |               |                 |
| A1        | -57.6                                                                             | -156.5                 | 7.38      | 3.85          | 2.80            |
| A2        | -69.9                                                                             | -164.0                 | 21.45     | 3.85          | 2.76            |
| A3        | -71.3                                                                             | -164.9                 | 25.09     | 3.83          | 2.76            |
| A4        | -65.5                                                                             | -158.6                 | 19.65     | 3.85          | 2.81            |
| A5        | -75.3                                                                             | -167.6                 | 28.15     | 3.86          | 2.79            |
| A6        | -65.4                                                                             | -158.2                 | 18.23     | 3.85          | 2.81            |
| A7        | -67.8                                                                             | -160.6                 | 15.10     | 3.84          | 2.82            |
| A8        | -76.2                                                                             | -168.4                 | 26.27     | 3.85          | 2.79            |
| A9        | -76.2                                                                             | -168.7                 | 30.39     | 3.83          | 2.79            |
| A10       | -53.5                                                                             | -153.4                 | 2.04      | 3.85          | 2.87            |
| A11       | -53.9                                                                             | -153.9                 | 13.89     | 3.83          | 2.91            |
| A12       | -51.9                                                                             | -151.9                 | 9.28      | 3.84          | 3.00            |
| A13       | -62.5                                                                             | -162.2                 | 12.69     | 3.86          | 2.89            |
| A14       | -64.7                                                                             | -164.1                 | 10.31     | 3.84          | 2.97            |
| A15       | -52.8                                                                             | -152.9                 | 4.40      | 3.86          | 2.88            |
| A16       | -54.7                                                                             | -154.4                 | 2.58      | 3.86          | 2.95            |
| A17       | -43.1                                                                             | -137.7                 | 17.26     | 3.84          | 2.92            |
| A18       | -80.9                                                                             | -105.8                 | 35.99     | 3.85          | 2.85            |

|     |       |        |       |      |      |
|-----|-------|--------|-------|------|------|
| A19 | -54.1 | -149.2 | 21.62 | 3.83 | 2.87 |
| A20 | -71.1 | -99.0  | 25.61 | 3.84 | 2.95 |
| A21 | 1.80  | -99.8  | 31.36 | 3.85 | 3.20 |
| A22 | -78.6 | -78.7  | 23.83 | 3.87 | 3.07 |
| A23 | 74.2  | 76.0   | 0.0   | 3.84 | 3.29 |
| A24 | -43.5 | -62.5  | 36.35 | 3.84 | 3.33 |
| A25 | 75.7  | 78.3   | 14.36 | 3.86 | 3.26 |
| A26 | 53.3  | -58.9  | 11.21 | 3.84 | 3.38 |
| A27 | -43.7 | -58.9  | 35.14 | 3.85 | 3.34 |
| A28 | 53.7  | -58.4  | 13.60 | 3.86 | 3.38 |
| A29 | 51.6  | -64.5  | 29.04 | 3.84 | 3.33 |
| A30 | -49.1 | -77.0  | 36.03 | 3.85 | 3.40 |
| A31 | 55.7  | -57.5  | 16.93 | 3.85 | 3.45 |
| A32 | 76.9  | 84.4   | 31.26 | 3.85 | 3.30 |
| A33 | 77.1  | 79.8   | 11.85 | 3.84 | 3.25 |
| A34 | 54.1  | -62.3  | 36.31 | 3.86 | 3.40 |
| A35 | 66.6  | -42.5  | 17.90 | 3.84 | 3.58 |
| A36 | 66.8  | -41.9  | 16.32 | 3.85 | 3.52 |
| A37 | 68.7  | -41.8  | 24.01 | 3.85 | 3.58 |
| A38 | 68.7  | -43.7  | 34.78 | 3.85 | 3.59 |
| A39 | 69.7  | -41.2  | 25.35 | 3.85 | 3.51 |
| A40 | 58.9  | -53.4  | 18.75 | 3.84 | 3.49 |
| A41 | 67.7  | -43.8  | 27.31 | 3.85 | 3.49 |
| A42 | 69.4  | -42.2  | 11.93 | 3.84 | 3.51 |
| A43 | 69.5  | -42.9  | 19.74 | 3.86 | 3.58 |
| A44 | 65.8  | -42.4  | 11.27 | 3.84 | 3.60 |
| A45 | 113.7 | 48.4   | 27.86 | 3.85 | 3.55 |
| B1  | 149.9 | 57.6   | 12.95 | 3.82 | 3.87 |
| B2  | 141.5 | 48.9   | 13.40 | 3.85 | 4.47 |



|     |        |        |       |      |      |
|-----|--------|--------|-------|------|------|
| B3  | 143.0  | 51.4   | 14.12 | 3.84 | 4.53 |
| B4  | -164.7 | -163.2 | 21.94 | 3.87 | 4.50 |
| B5  | -166.4 | -176.9 | 14.93 | 3.87 | 4.46 |
| B6  | -164.6 | -168.2 | 18.23 | 3.86 | 4.37 |
| B7  | 154.7  | 65.0   | 20.66 | 3.85 | 4.43 |
| B8  | 142.0  | 49.4   | 10.48 | 3.86 | 4.26 |
| B9  | 91.9   | 82.4   | 14.17 | 3.82 | 4.52 |
| B10 | 174.9  | 176.2  | 9.08  | 3.85 | 4.07 |
| B11 | 165.3  | 163.0  | 25.47 | 3.86 | 4.70 |
| B12 | 163.5  | 160.5  | 25.94 | 3.84 | 4.89 |
| B13 | 159.4  | 157.0  | 20.49 | 3.83 | 4.90 |
| B14 | 160.3  | 157.2  | 18.81 | 3.84 | 4.94 |
| B15 | 167.3  | 165.7  | 27.18 | 3.87 | 4.93 |
| B16 | 161.6  | 159.4  | 27.60 | 3.83 | 4.86 |
| B17 | 69.4   | -42.3  | 32.20 | 3.86 | 4.92 |

**Table S6.** Values of dihedral angles, energies and intramolecular distances of the *compound 2* molecule in the considered conformers corresponding to typical types of intramolecular motion

| Conformer | Values of the dihedral angle, (°)                                                   |                        | E, kJ/mol | r (H2-H14), Å | r (H6-H9/13), Å |
|-----------|-------------------------------------------------------------------------------------|------------------------|-----------|---------------|-----------------|
|           | 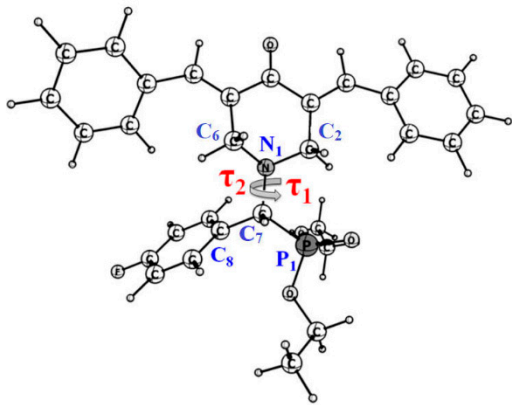 |                        |           |               |                 |
|           | $\tau_1$ (C6-N1-C7-C8)                                                              | $\tau_2$ (C2-N1-C7-P1) |           |               |                 |
| A1        | -67.7                                                                               | -161.8                 | 21.50     | 3.83          | 3.27            |
| A2        | 67.5                                                                                | -41.6                  | 17.98     | 3.81          | 3.61            |
| A3        | 75.1                                                                                | 77.4                   | 14.58     | 3.84          | 3.55            |

|     |         |          |       |      |      |
|-----|---------|----------|-------|------|------|
| A4  | 60.2    | -51.8    | 18.58 | 3.82 | 3.40 |
| A5  | 165.3   | 94.4     | 36.02 | 3.84 | 3.55 |
| A6  | 70.5    | -41.6    | 20.08 | 3.84 | 3.45 |
| A7  | 69.8    | -41.4    | 27.50 | 3.84 | 3.66 |
| A8  | -69.4   | -163.1   | 25.35 | 3.83 | 3.36 |
| A9  | -42.6   | -57.7    | 36.02 | 3.84 | 3.44 |
| A10 | 70      | -41.4    | 12.06 | 3.84 | 3.37 |
| A11 | -54.1   | -153.6   | 0.0   | 3.84 | 3.37 |
| A12 | 70.5    | -41.6    | 20.08 | 3.84 | 2.98 |
| A13 | -62.4   | -155.6   | 19.85 | 3.84 | 3.52 |
| A14 | 153.8   | 63.8     | 20.33 | 3.86 | 3.44 |
| A15 | -53.2   | -148.2   | 22.05 | 3.84 | 3.29 |
| A16 | -62.9   | -155.8   | 18.25 | 3.84 | 3.49 |
| A17 | 52.1    | -64.0    | 28.33 | 3.84 | 3.52 |
| A18 | 55.5    | -57.9    | 17.07 | 3.83 | 3.34 |
| A19 | -62.079 | -162.164 | 12.77 | 3.83 | 3.44 |
| A20 | -62.094 | -162.167 | 12.78 | 3.83 | 3.29 |
| A21 | 70      | -41.4    | 12.06 | 3.84 | 3.85 |
| A22 | 51.2    | -61.8    | 9.19  | 3.84 | 3.36 |
| B1  | -75.9   | -168.3   | 28.26 | 3.83 | 4.48 |
| B2  | -62.9   | -155.8   | 18.25 | 3.84 | 4.50 |
| B3  | -53.1   | -153.4   | 14.14 | 3.83 | 4.54 |
| B4  | -65.8   | -165.1   | 10.25 | 3.85 | 4.48 |
| B5  | -66.7   | -159.4   | 15.16 | 3.84 | 4.46 |
| B6  | -75.4   | -167.7   | 26.55 | 3.83 | 4.55 |
| B7  | -44.7   | -138.0   | 20.73 | 3.84 | 4.62 |
| B8  | -62.9   | -155.8   | 18.25 | 3.84 | 4.50 |
| B9  | -65.8   | -165.1   | 10.25 | 3.85 | 4.55 |
| B10 | -77.8   | -103.4   | 35.36 | 3.86 | 4.51 |

|     |        |        |       |      |      |
|-----|--------|--------|-------|------|------|
| B11 | 54.7   | -61.7  | 36.25 | 3.84 | 4.72 |
| B12 | -53.2  | -148.2 | 22.06 | 3.84 | 4.50 |
| B13 | 69.6   | -42.3  | 32.86 | 3.84 | 4.72 |
| B14 | 67.5   | -41.4  | 16.72 | 3.81 | 4.67 |
| B15 | -165.4 | -168.9 | 18.86 | 3.85 | 4.51 |
| B16 | 69.0   | -41.6  | 23.85 | 3.82 | 4.71 |
| B17 | -42.6  | -57.7  | 36.02 | 3.84 | 4.71 |

**Table S7.** Normalized integral intensities of the cross-peaks, cross-relaxation rates and inter-proton distances in the *compound 1* molecule used to calculate the conformer populations in CDCl<sub>3</sub>

| Groups     | r <sub>calc</sub> , Å | Dist.    | Mixing Time | Relative Integral Intensity | Cross-Relaxation Rate, s <sup>-1</sup> | Error                  | r <sub>exp</sub> , Å |
|------------|-----------------------|----------|-------------|-----------------------------|----------------------------------------|------------------------|----------------------|
| A+B        | 3.85                  | H2-H14   | 0.15        | 0.0006                      | 3.4·10 <sup>-3</sup>                   | ±0.13·10 <sup>-3</sup> | 3.85±0.06            |
|            |                       |          | 0.20        | 0.0006                      |                                        |                        |                      |
|            |                       |          | 0.25        | 0.0009                      |                                        |                        |                      |
|            |                       |          | 0.30        | 0.0010                      |                                        |                        |                      |
|            |                       |          | 0.35        | 0.0011                      |                                        |                        |                      |
|            |                       |          | 0.40        | 0.0013                      |                                        |                        |                      |
|            |                       |          | 0.45        | 0.0014                      |                                        |                        |                      |
|            |                       |          | 0.50        | 0.0016                      |                                        |                        |                      |
|            |                       |          | 0.55        | 0.0020                      |                                        |                        |                      |
|            |                       |          | 0.60        | 0.0020                      |                                        |                        |                      |
|            |                       |          | 0.65        | 0.0023                      |                                        |                        |                      |
|            |                       |          | 0.70        | 0.0023                      |                                        |                        |                      |
| A<br><br>B | 3.07<br><br>4.48      | H6-H9/13 | 0.15        | 0.0018                      | 4.4·10 <sup>-3</sup>                   | ±0.07·10 <sup>-3</sup> | 3.67±0.06            |
|            |                       |          | 0.20        | 0.0020                      |                                        |                        |                      |
|            |                       |          | 0.25        | 0.0023                      |                                        |                        |                      |
|            |                       |          | 0.30        | 0.0024                      |                                        |                        |                      |
|            |                       |          | 0.35        | 0.0027                      |                                        |                        |                      |
|            |                       |          | 0.40        | 0.0029                      |                                        |                        |                      |
|            |                       |          | 0.45        | 0.0032                      |                                        |                        |                      |
|            |                       |          | 0.50        | 0.0034                      |                                        |                        |                      |
|            |                       |          | 0.55        | 0.0036                      |                                        |                        |                      |
|            |                       |          | 0.60        | 0.0038                      |                                        |                        |                      |
|            |                       |          | 0.65        | 0.0041                      |                                        |                        |                      |
|            |                       |          | 0.70        | 0.0042                      |                                        |                        |                      |
| 0.75       | 0.0044                |          |             |                             |                                        |                        |                      |

**Table S8.** Normalized integral intensities of the cross-peaks, cross-relaxation rates and inter-proton distances in the *compound 2* molecule used to calculate the conformer populations in CDCl<sub>3</sub>

| Groups | r <sub>calc</sub> , Å | Dist.    | Mixing Time | Relative Integral Intensity | Cross-Relaxation Rate, s <sup>-1</sup> | Error                  | r <sub>exp</sub> , Å |
|--------|-----------------------|----------|-------------|-----------------------------|----------------------------------------|------------------------|----------------------|
| A+B    | 3.84                  | H2-H14   | 0.15        | 0.0007                      | 3.4·10 <sup>-3</sup>                   | ±0.06·10 <sup>-3</sup> | 3.84±0.06            |
|        |                       |          | 0.20        | 0.0009                      |                                        |                        |                      |
|        |                       |          | 0.25        | 0.0011                      |                                        |                        |                      |
|        |                       |          | 0.30        | 0.0012                      |                                        |                        |                      |
|        |                       |          | 0.35        | 0.0014                      |                                        |                        |                      |
|        |                       |          | 0.40        | 0.0016                      |                                        |                        |                      |
|        |                       |          | 0.45        | 0.0017                      |                                        |                        |                      |
|        |                       |          | 0.50        | 0.0019                      |                                        |                        |                      |
|        |                       |          | 0.55        | 0.0020                      |                                        |                        |                      |
|        |                       |          | 0.60        | 0.0023                      |                                        |                        |                      |
|        |                       |          | 0.65        | 0.0024                      |                                        |                        |                      |
|        |                       |          | 0.70        | 0.0026                      |                                        |                        |                      |
|        |                       |          | 0.75        | 0.0028                      |                                        |                        |                      |
| A      | 3.40                  | H6-H9/13 | 0.15        | 0.0022                      | 5.8·10 <sup>-3</sup>                   | ±0.14·10 <sup>-3</sup> | 3.51±0.05            |
|        |                       |          | 0.20        | 0.0026                      |                                        |                        |                      |
|        |                       |          | 0.25        | 0.0030                      |                                        |                        |                      |
|        |                       |          | 0.30        | 0.0033                      |                                        |                        |                      |
|        |                       |          | 0.35        | 0.0036                      |                                        |                        |                      |
|        |                       |          | 0.40        | 0.0037                      |                                        |                        |                      |
| B      | 4.57                  |          | 0.45        | 0.0042                      |                                        |                        |                      |
|        |                       |          | 0.50        | 0.0045                      |                                        |                        |                      |
|        |                       |          | 0.55        | 0.0046                      |                                        |                        |                      |
|        |                       |          | 0.60        | 0.0051                      |                                        |                        |                      |
|        |                       |          | 0.65        | 0.0053                      |                                        |                        |                      |
|        |                       |          | 0.70        | 0.0055                      |                                        |                        |                      |
|        |                       |          | 0.75        | 0.0058                      |                                        |                        |                      |

**Table S9.** Average integral intensity of distances derived from NOESY spectral analysis for compound 1

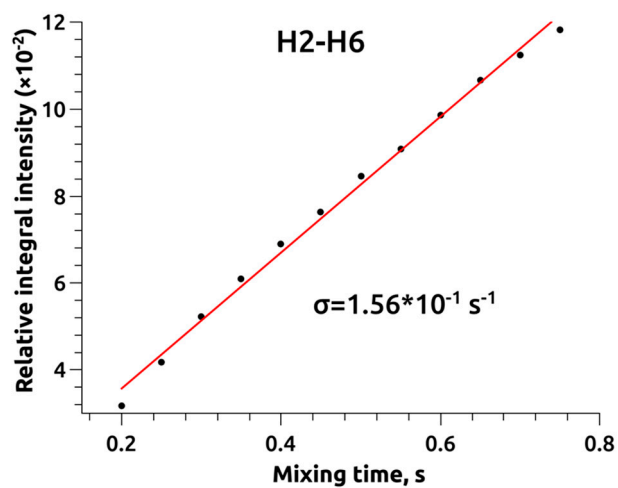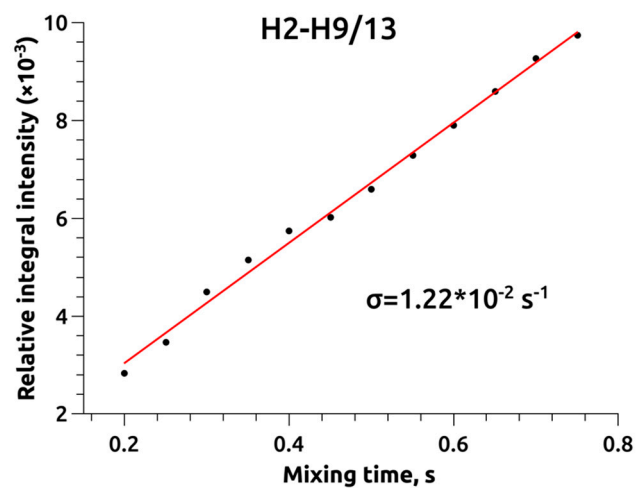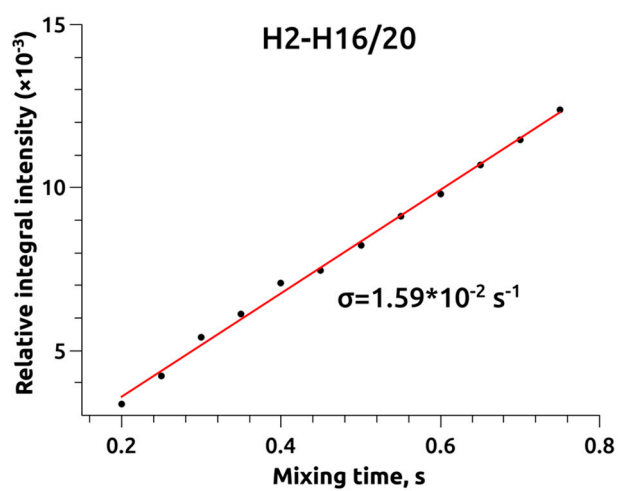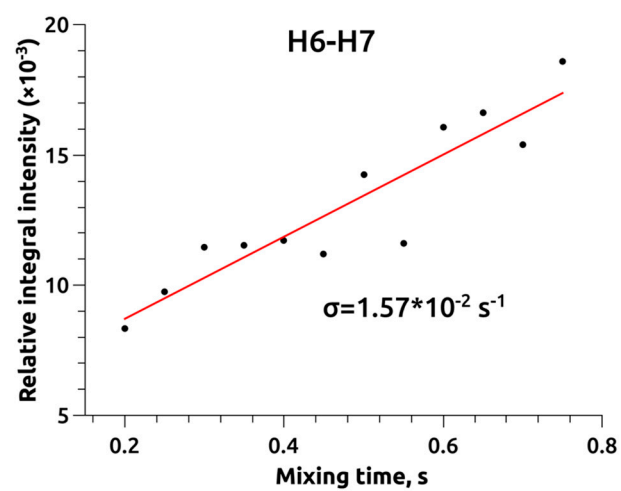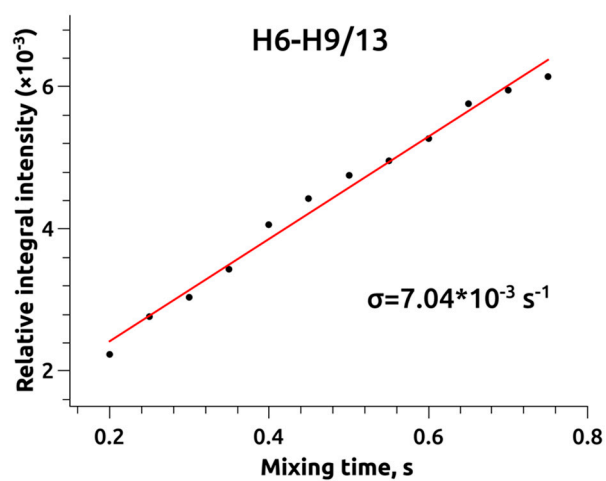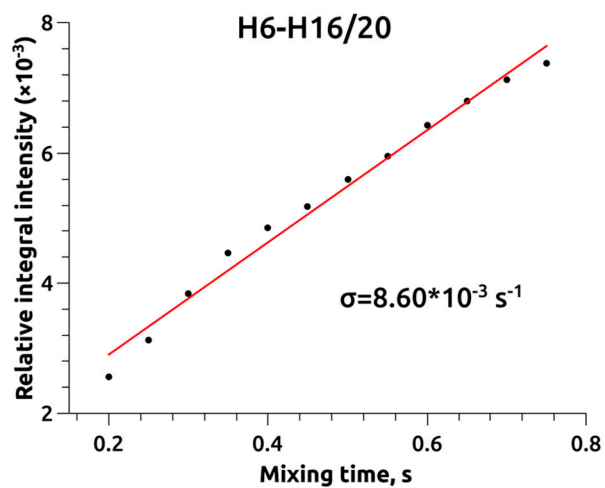

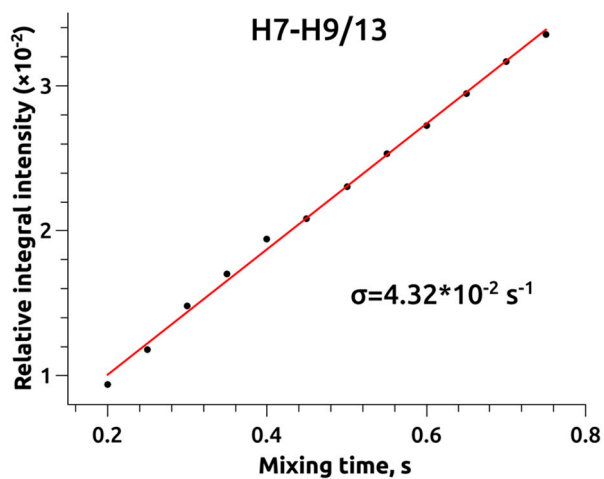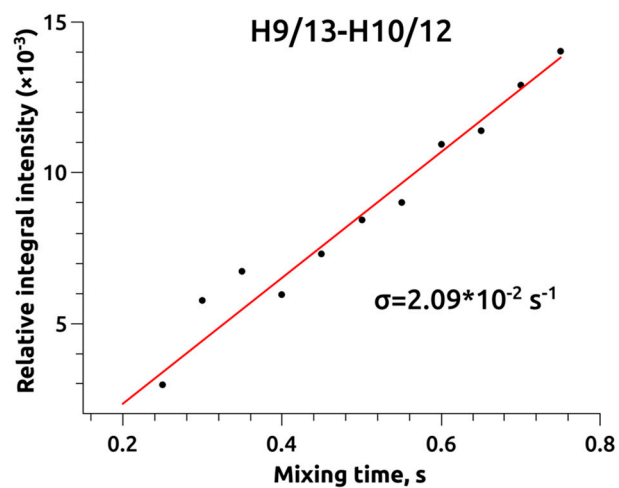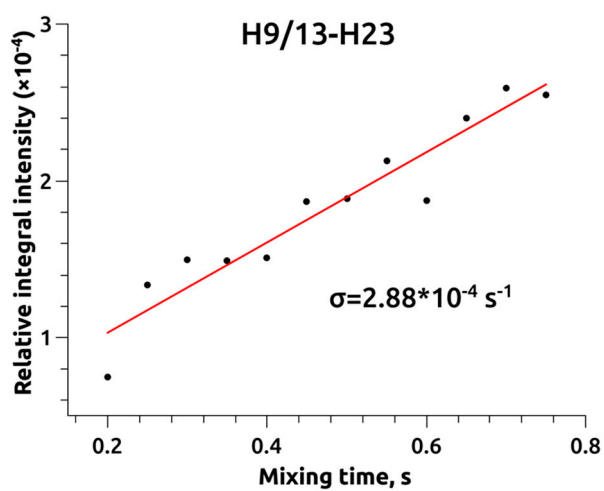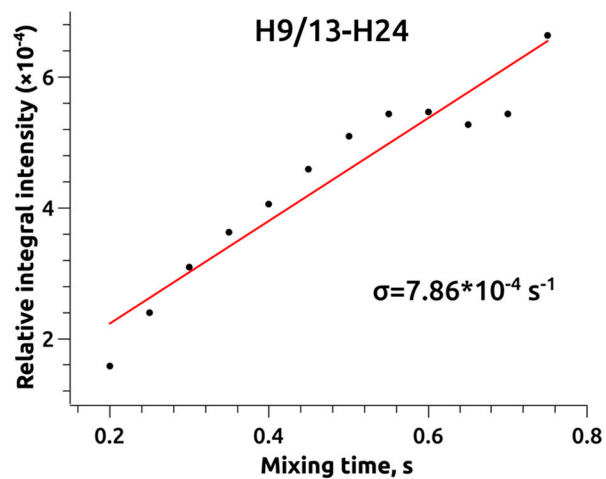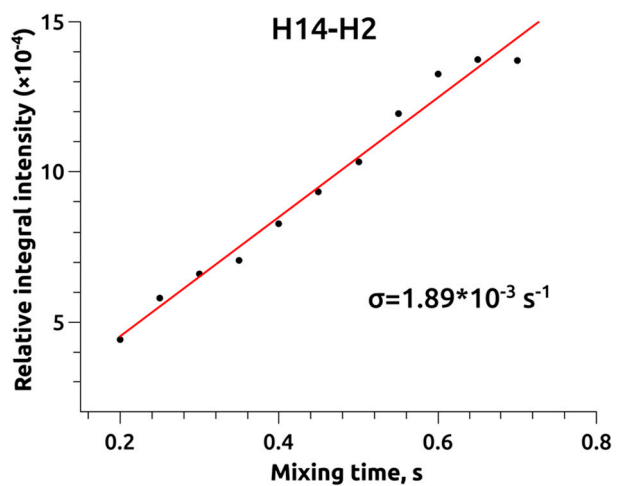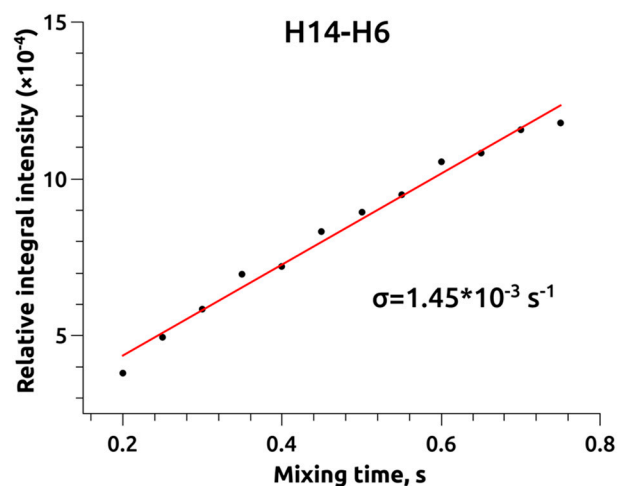

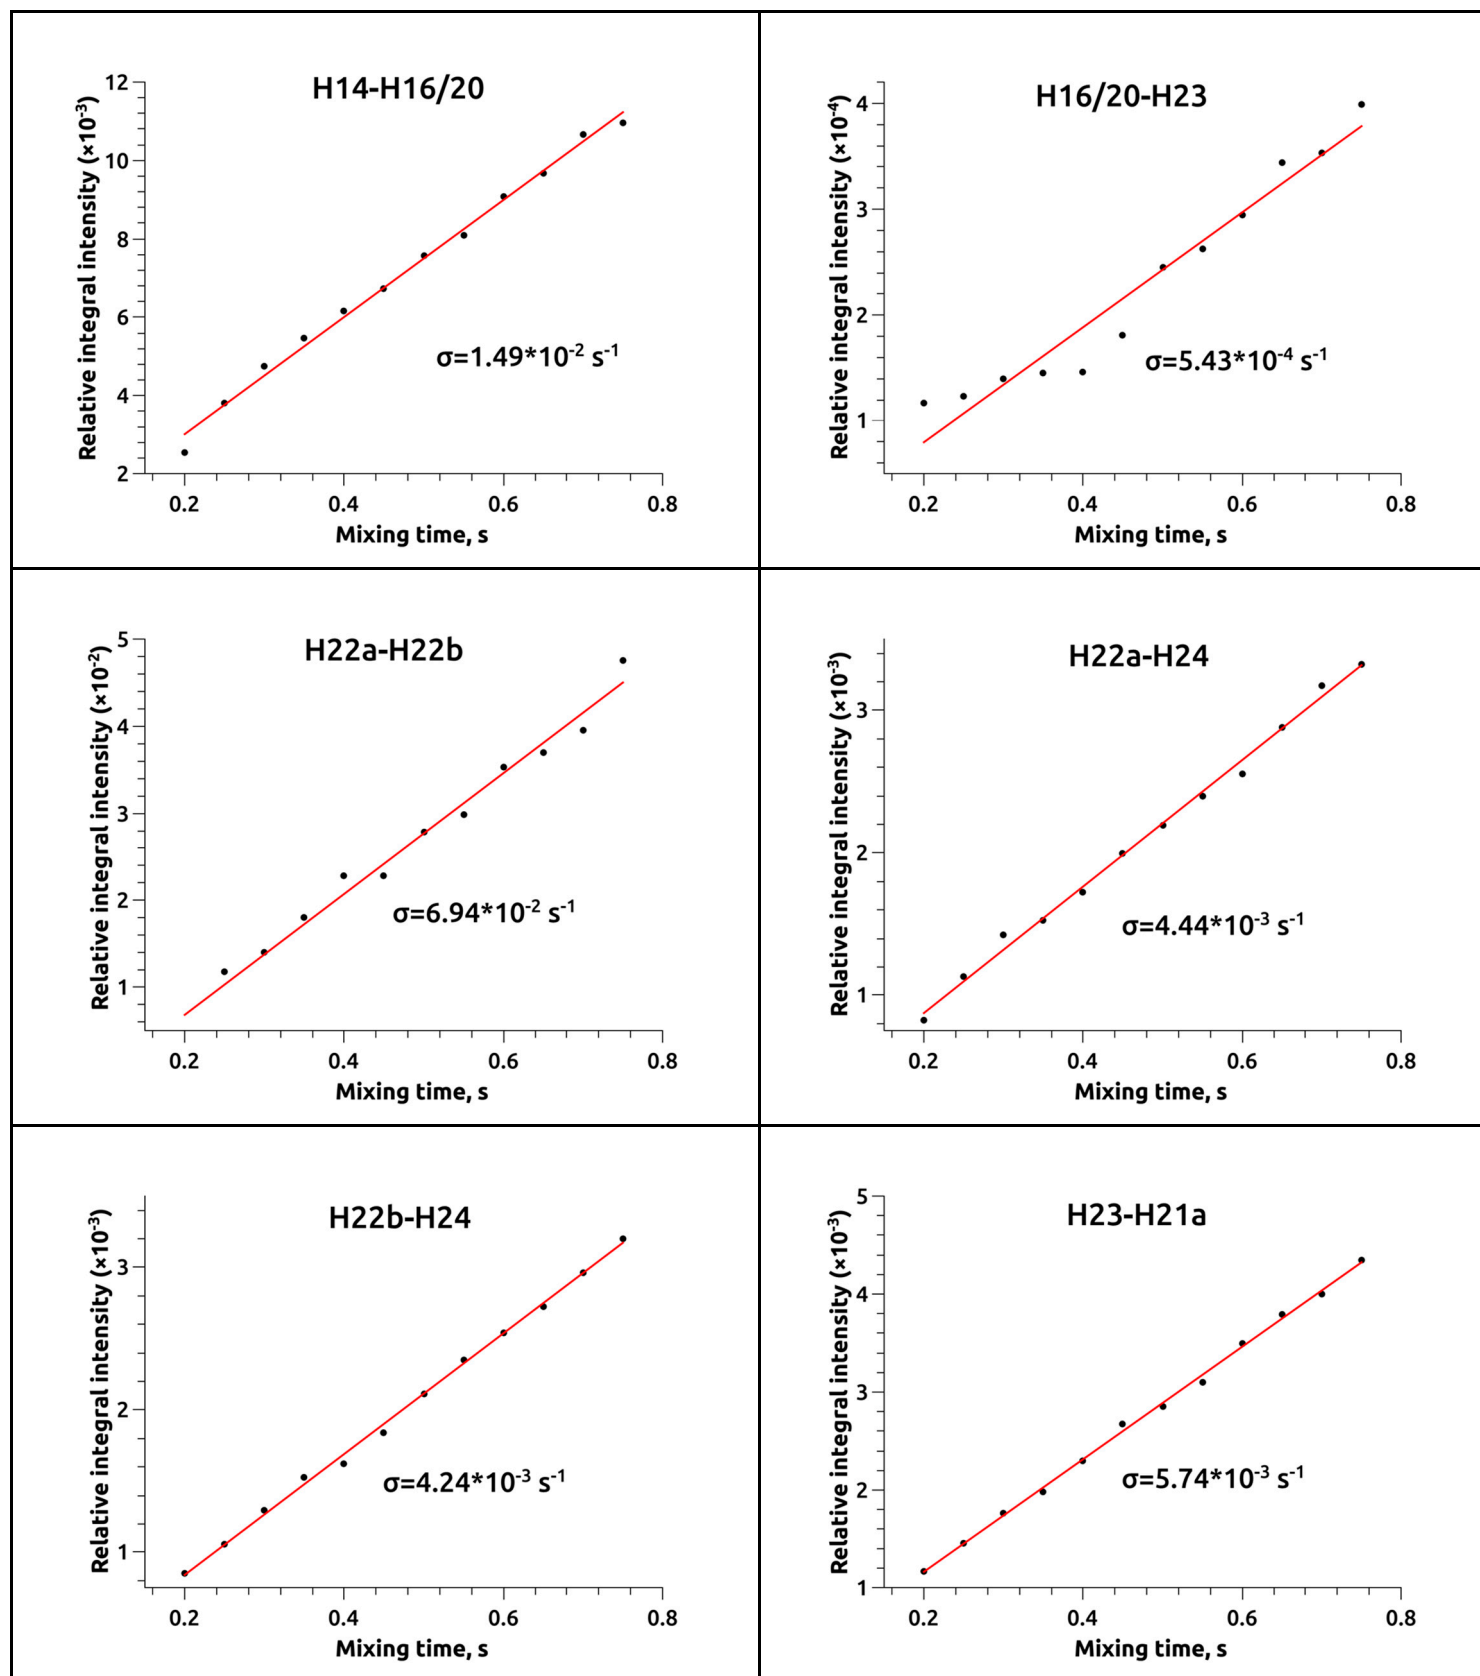

**Table S10.** Average integral intensity of distances derived from NOESY spectral analysis for compound 2.

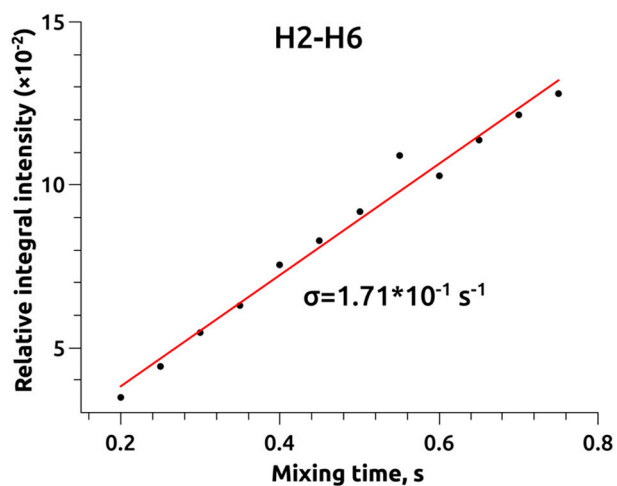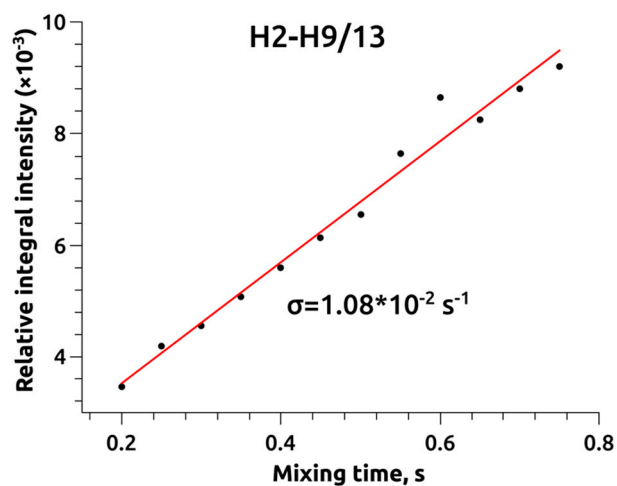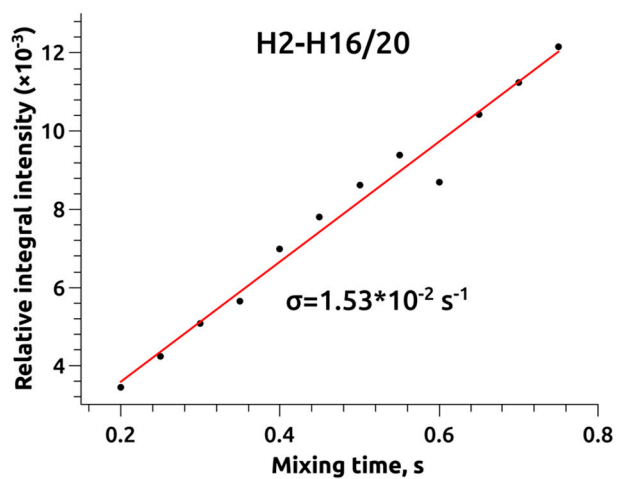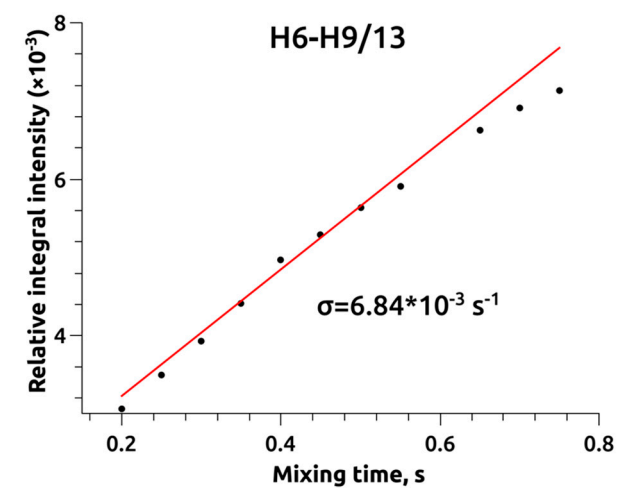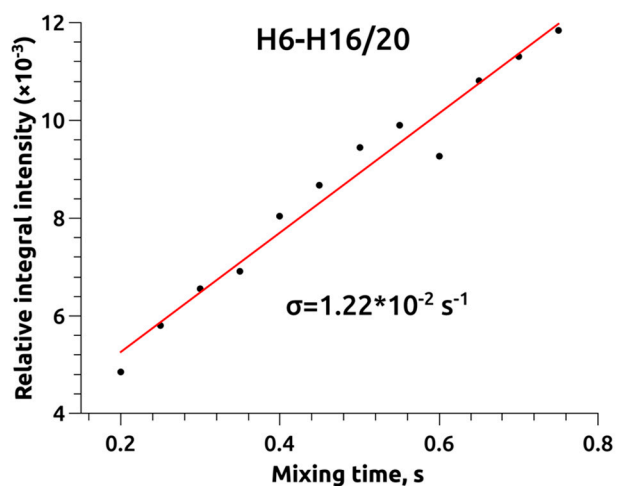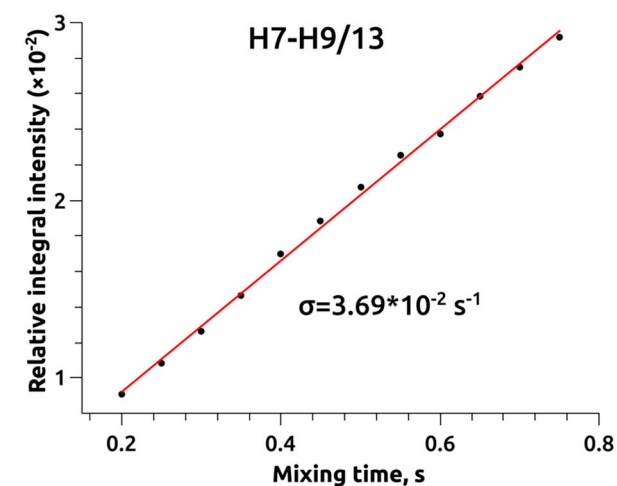



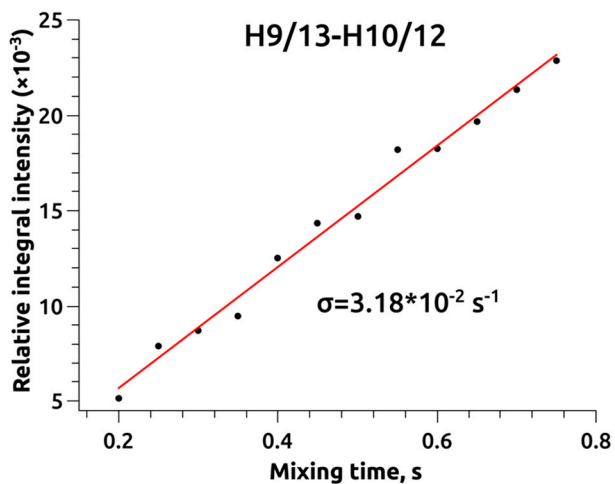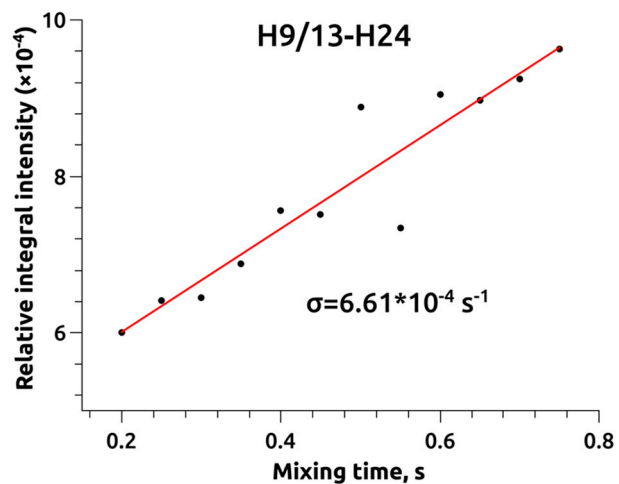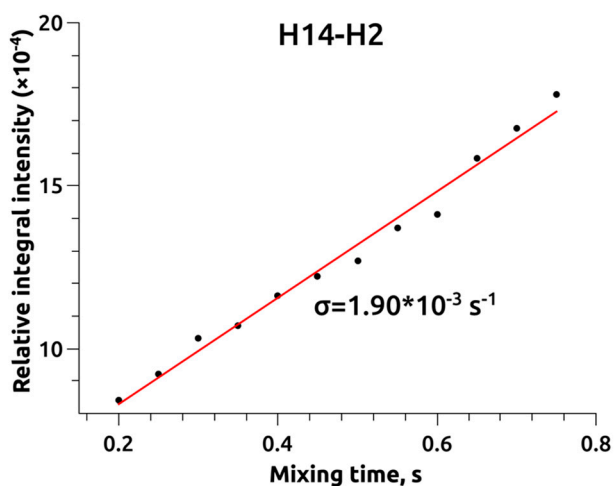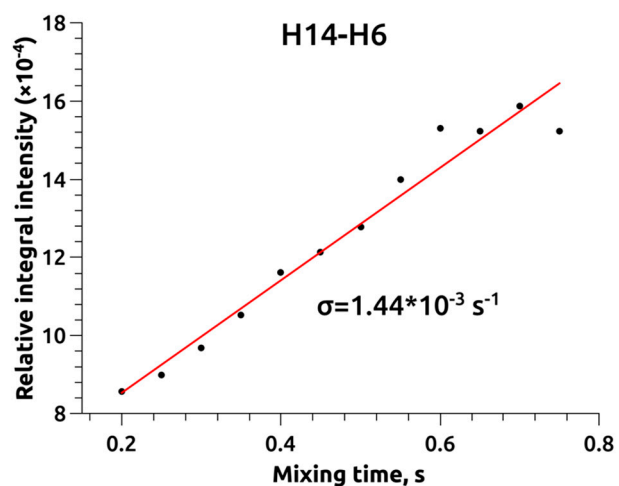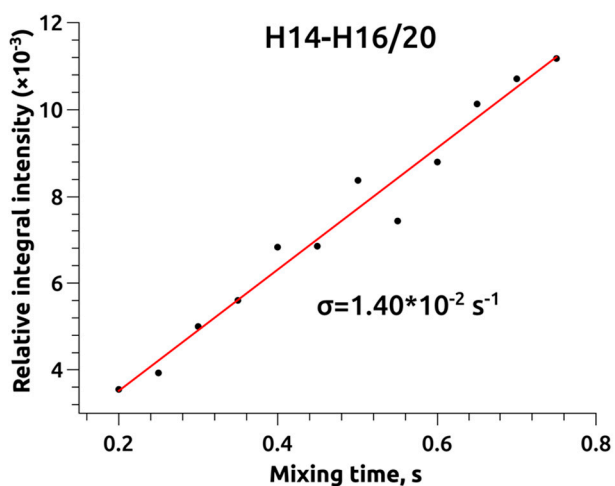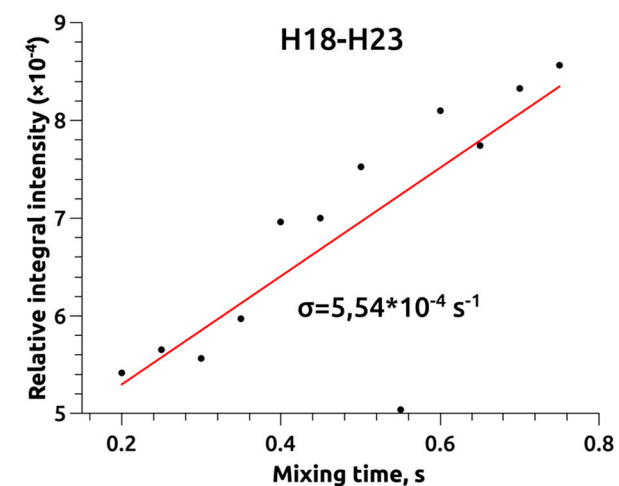

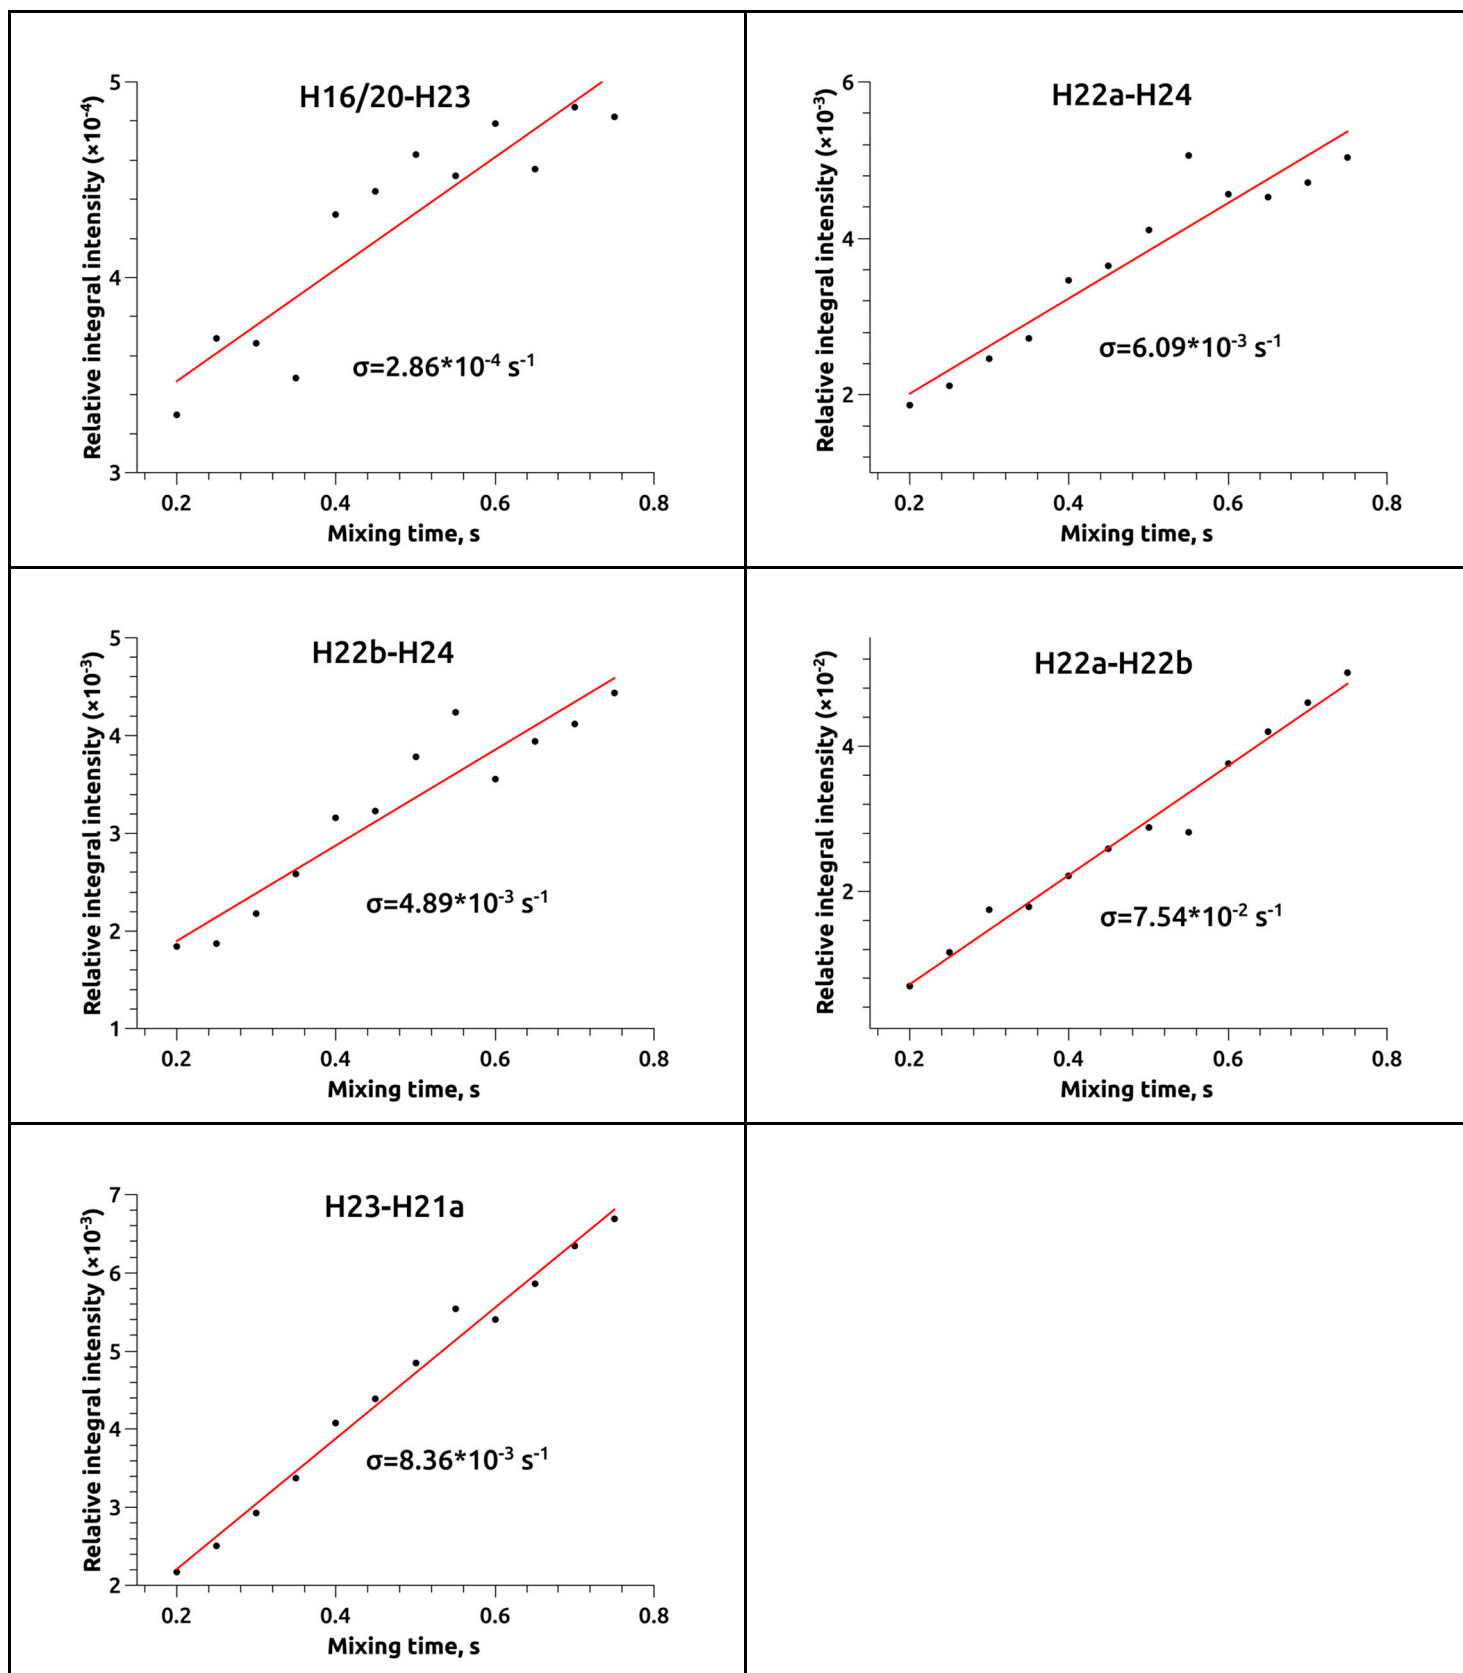

**Table S11.** Dependence of the cross-relaxation rate on the internuclear distance for conformers for compound 1.

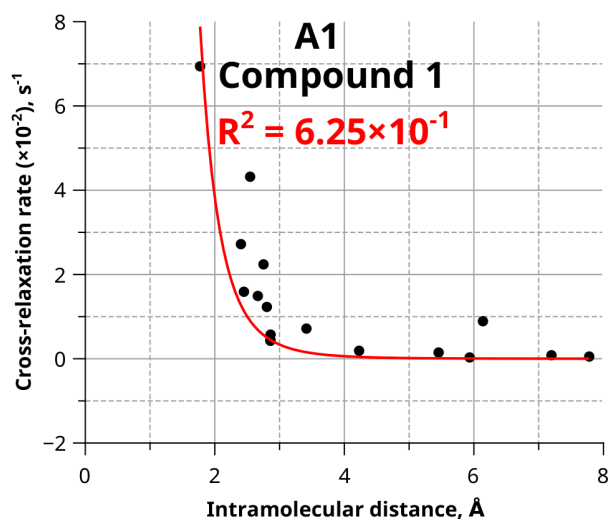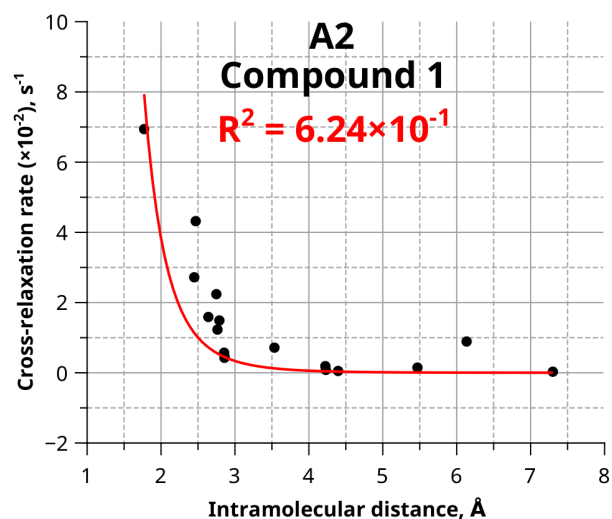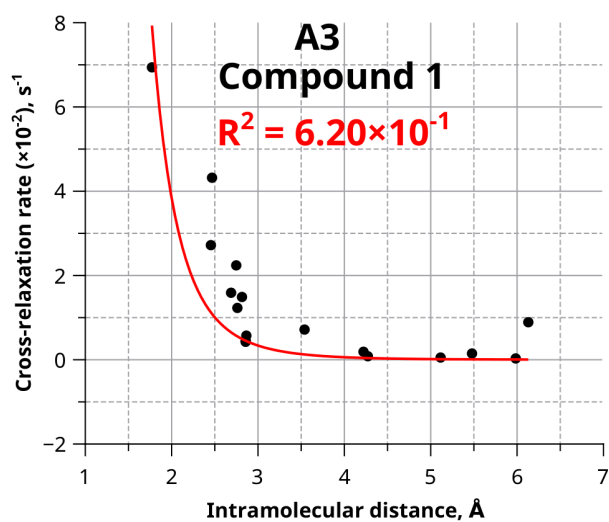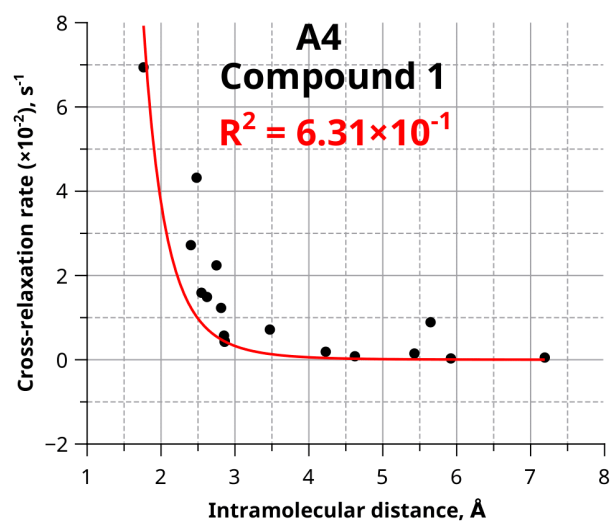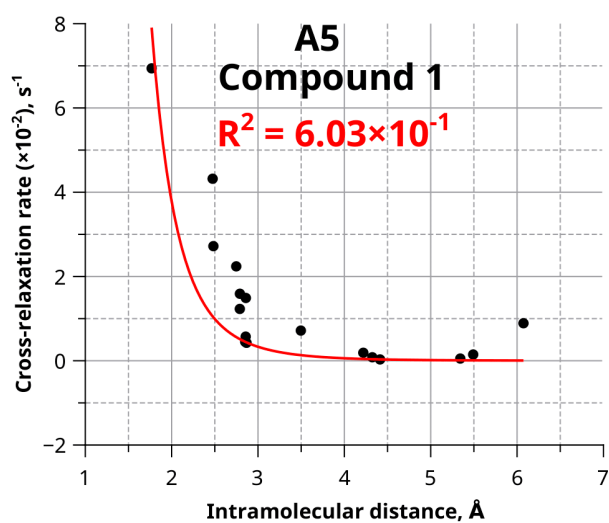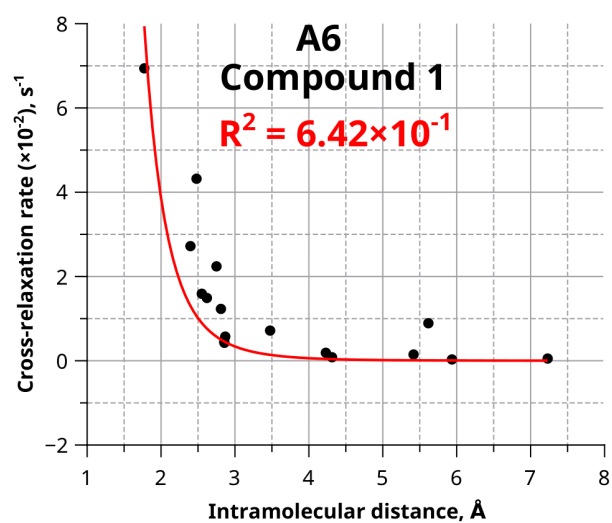

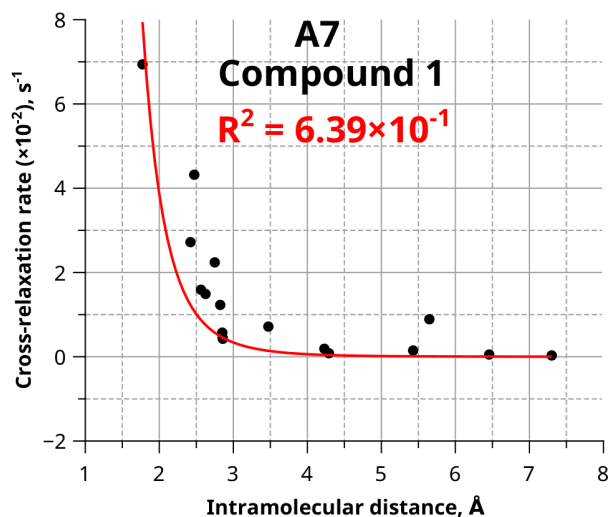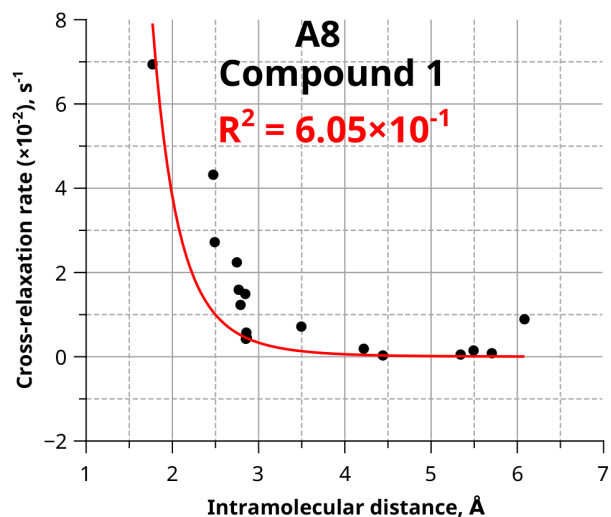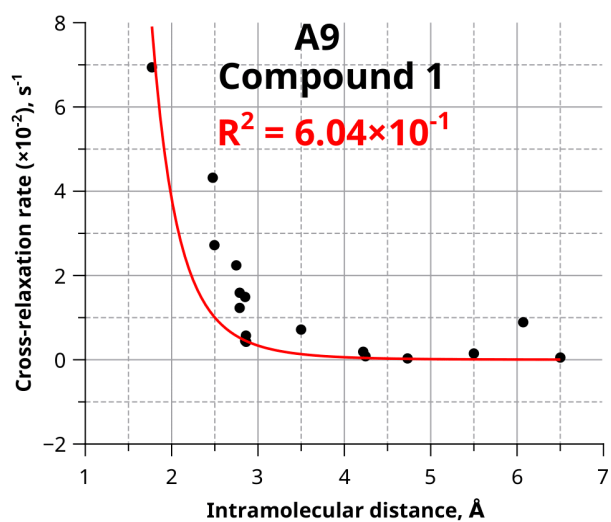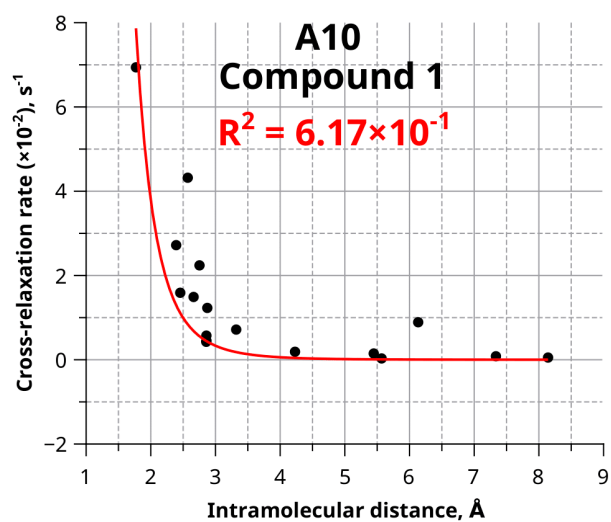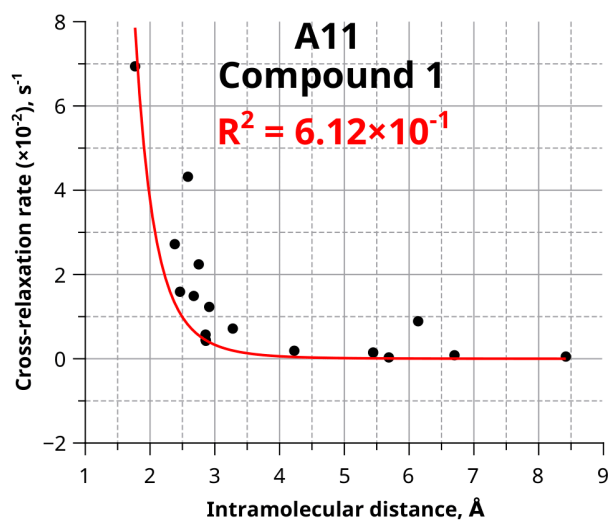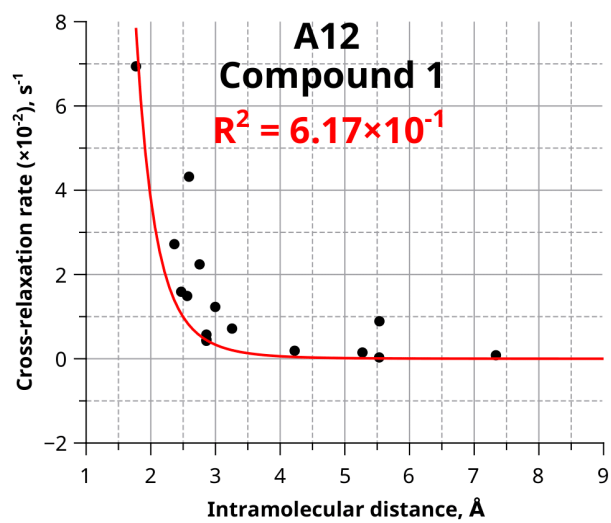

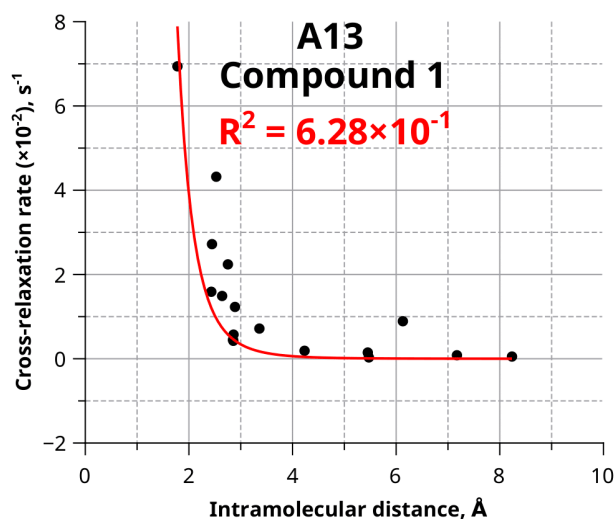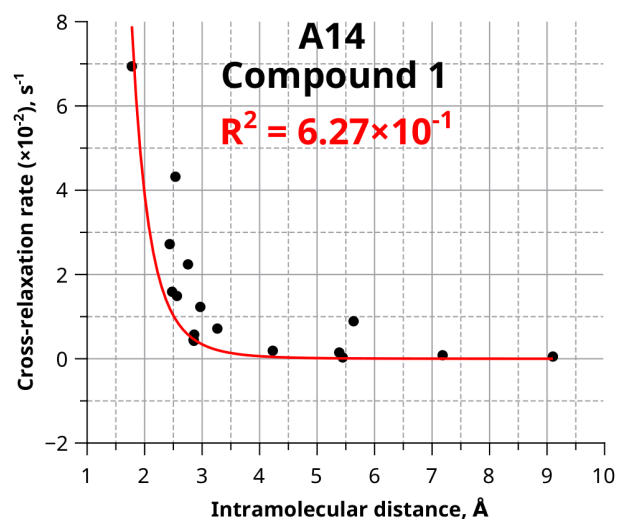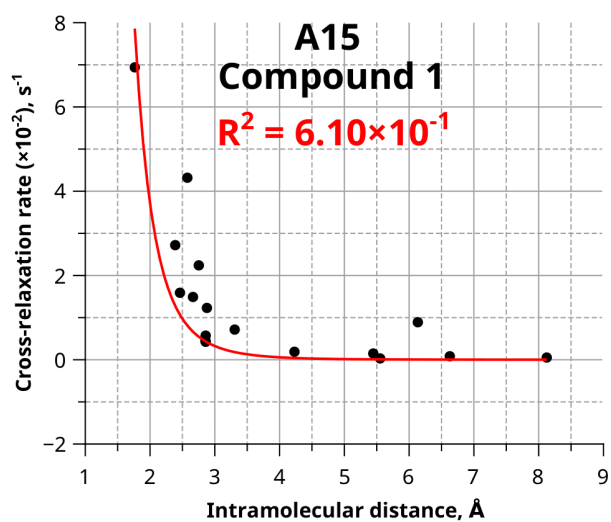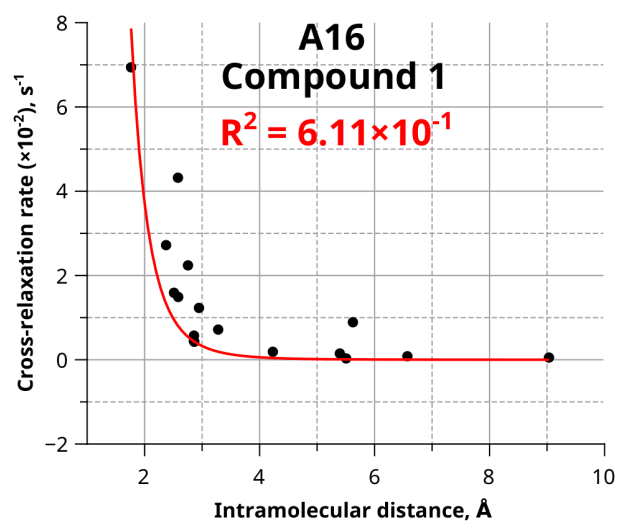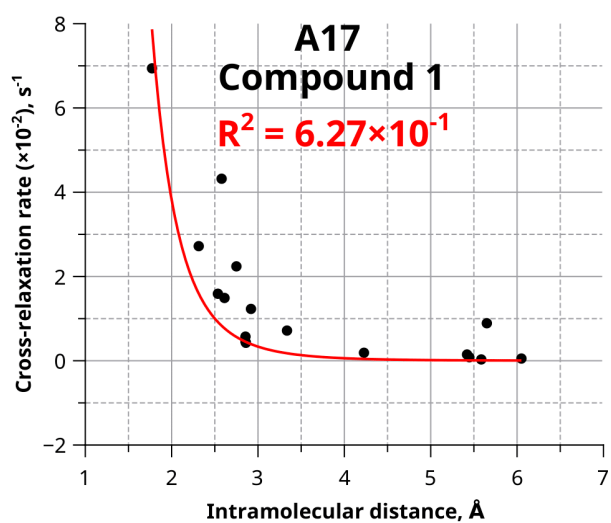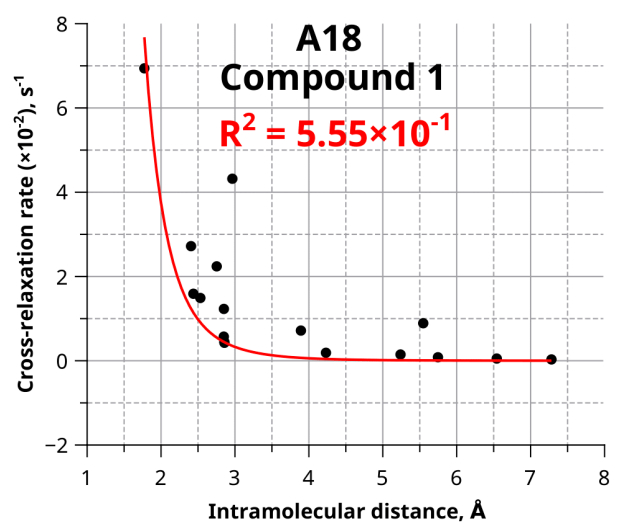

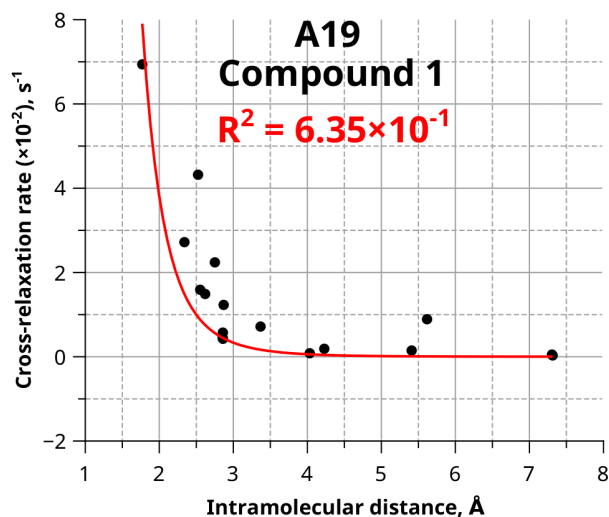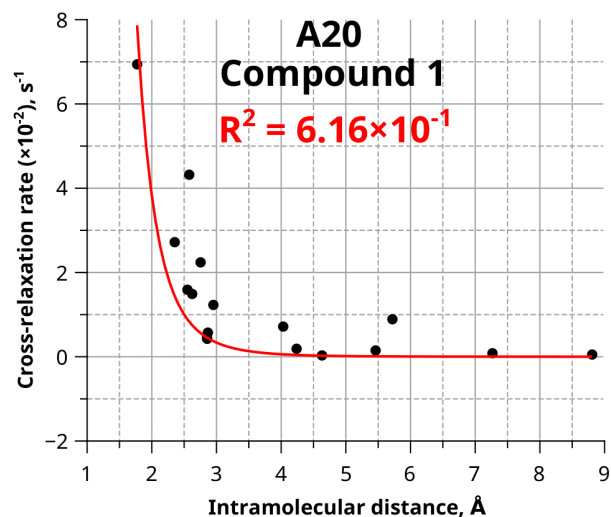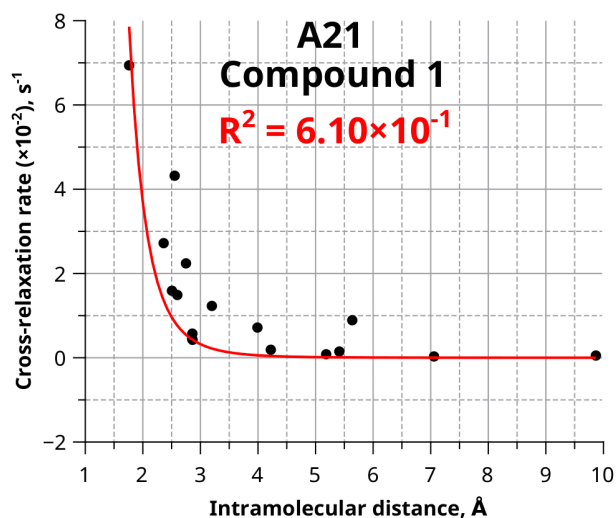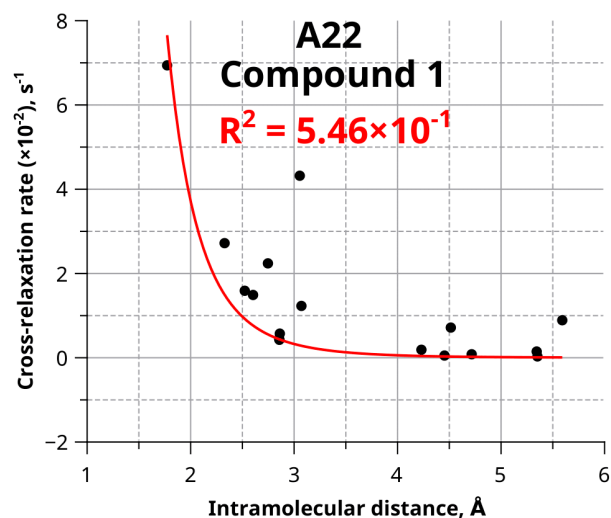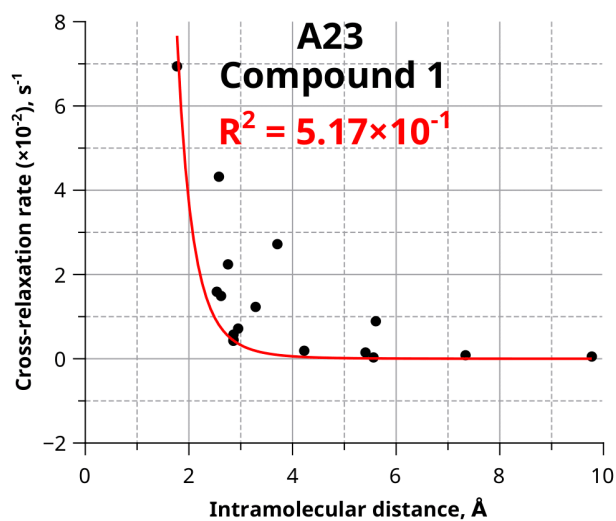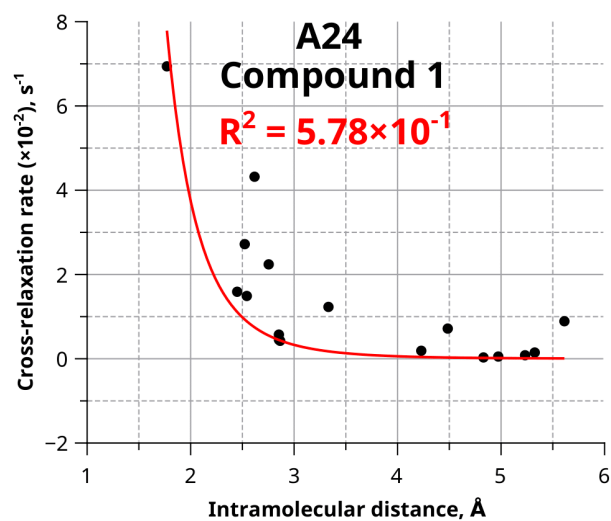

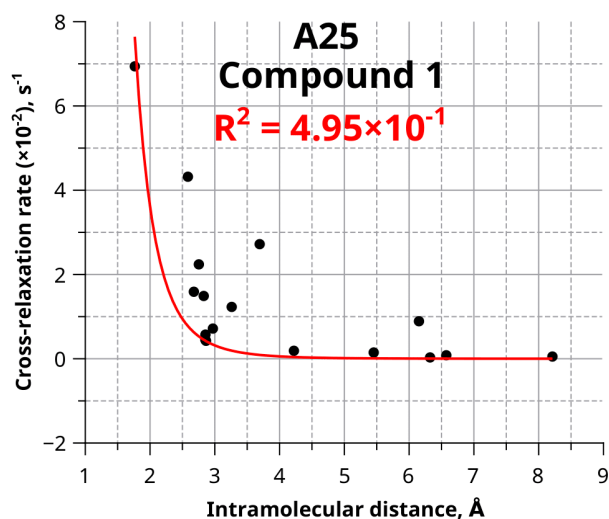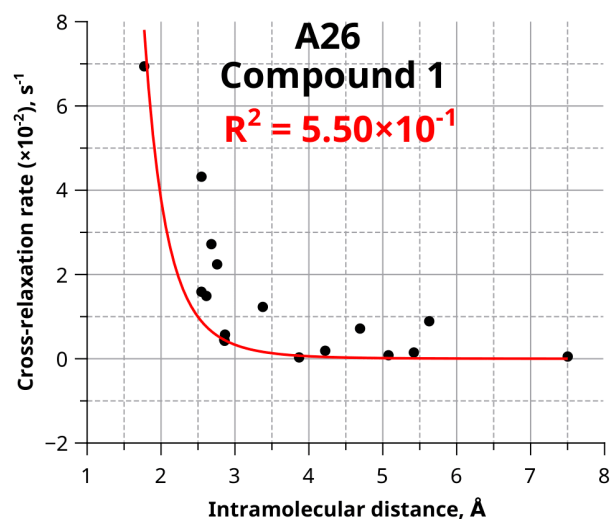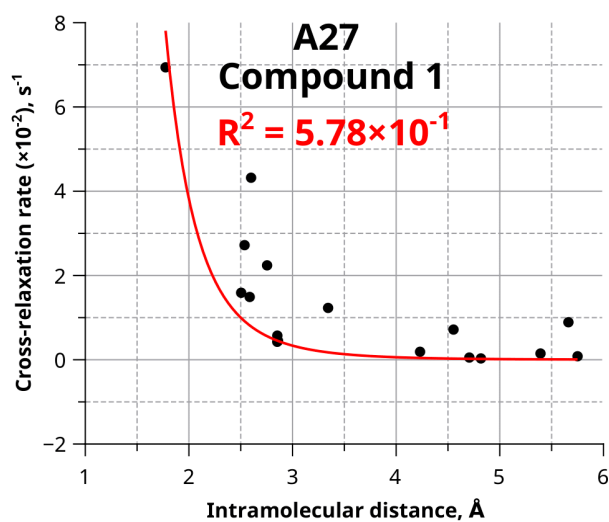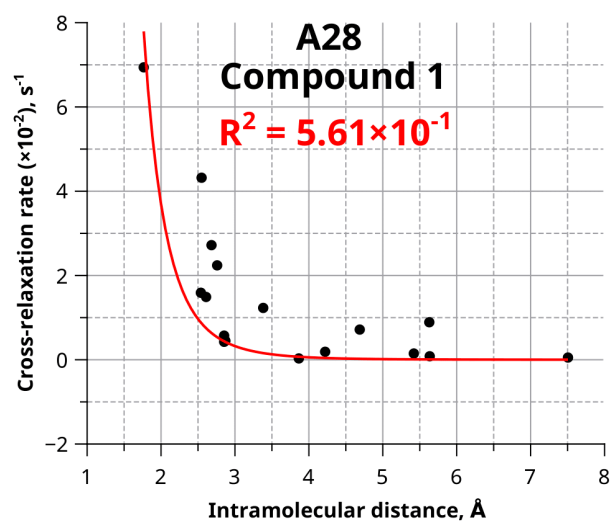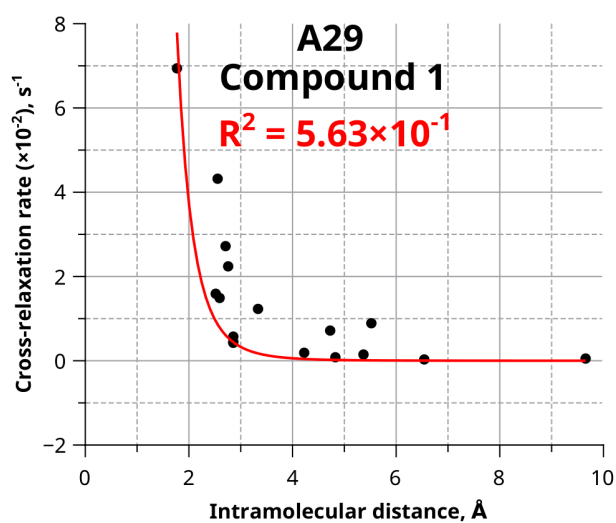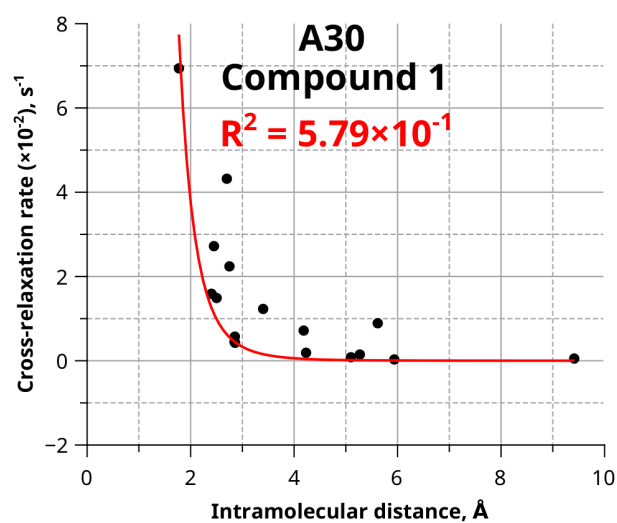

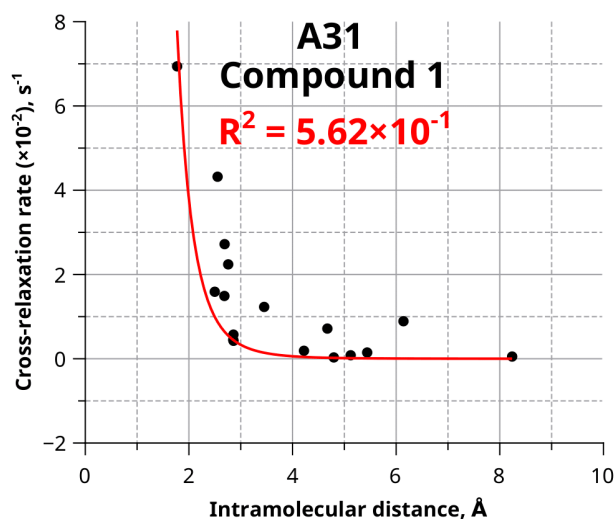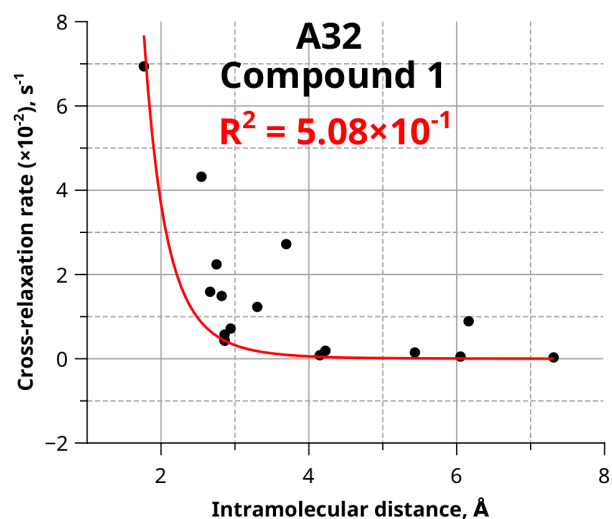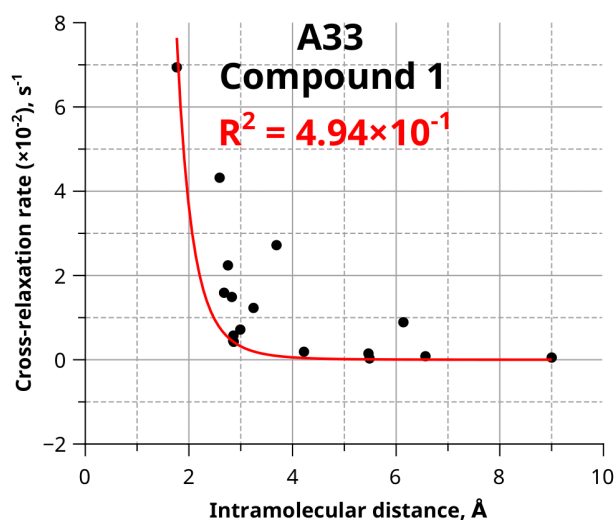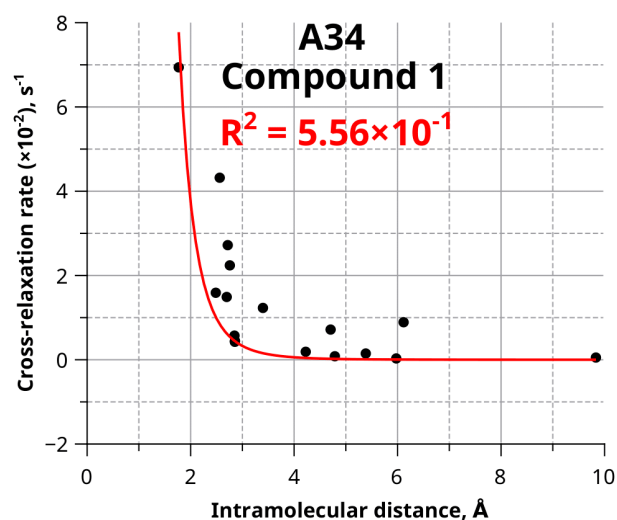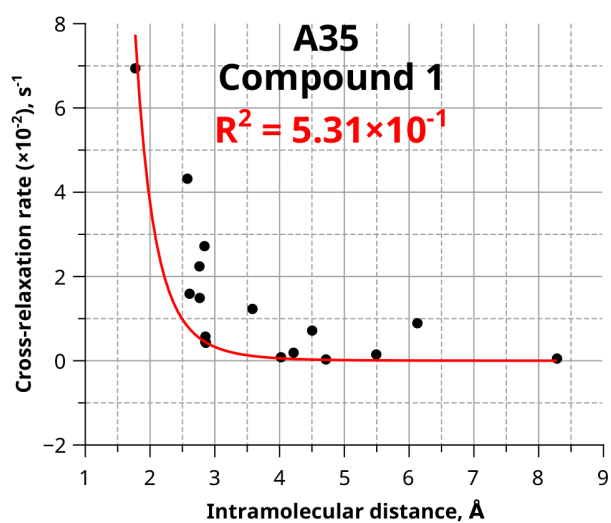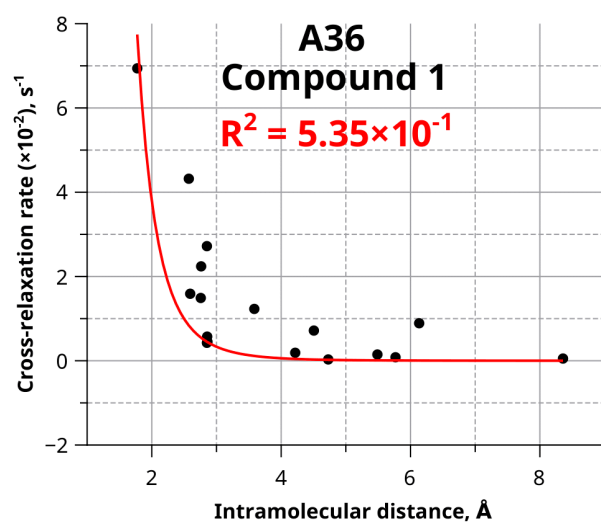



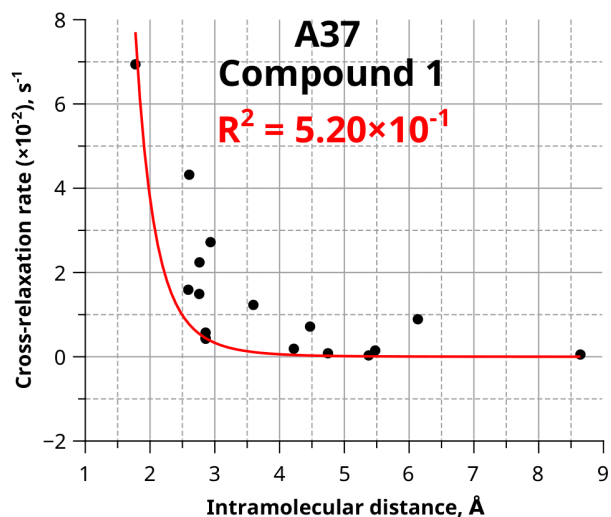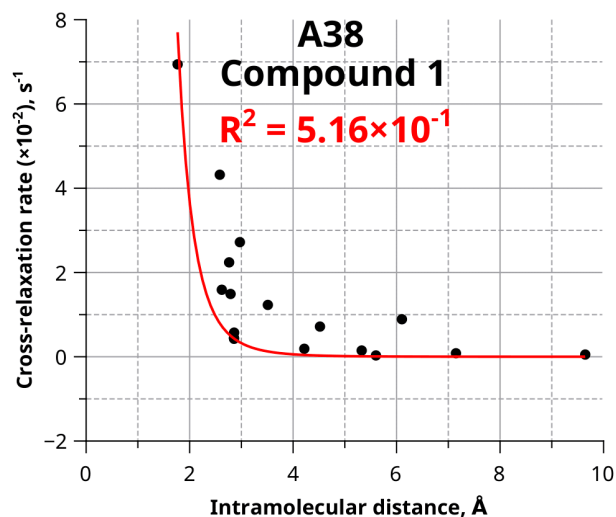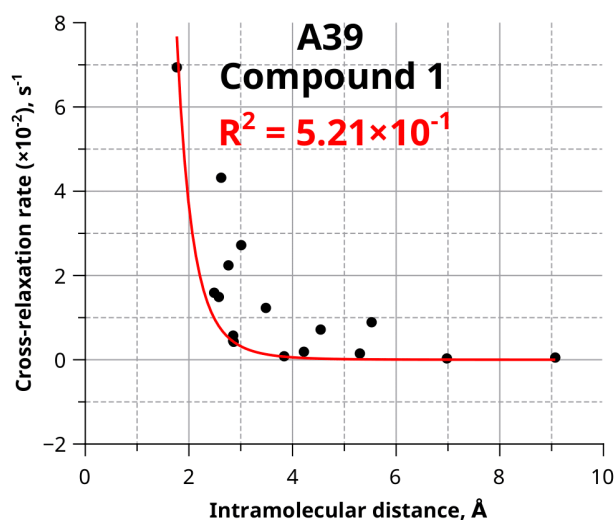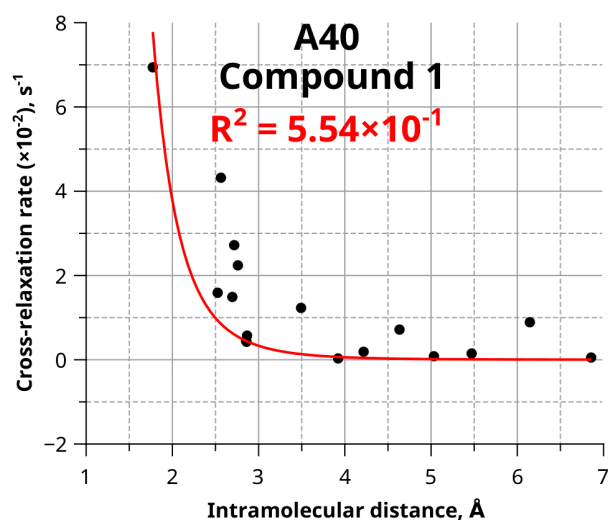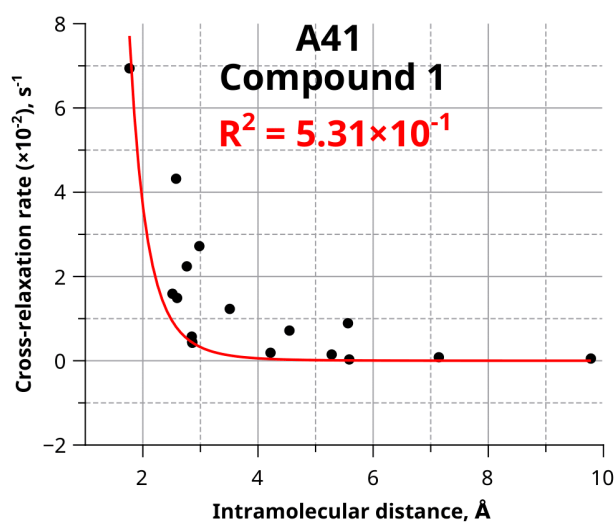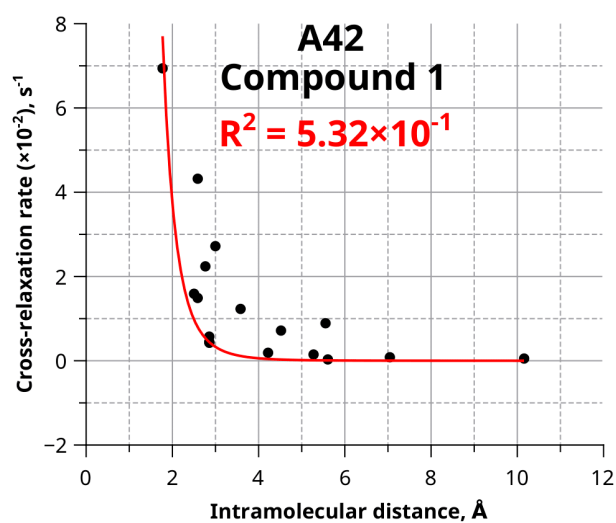

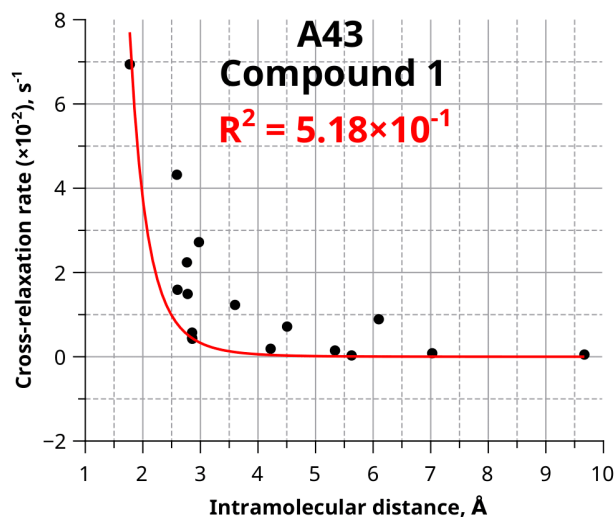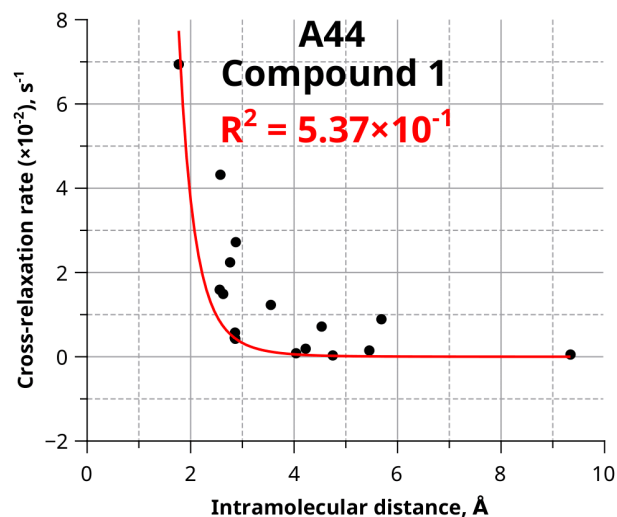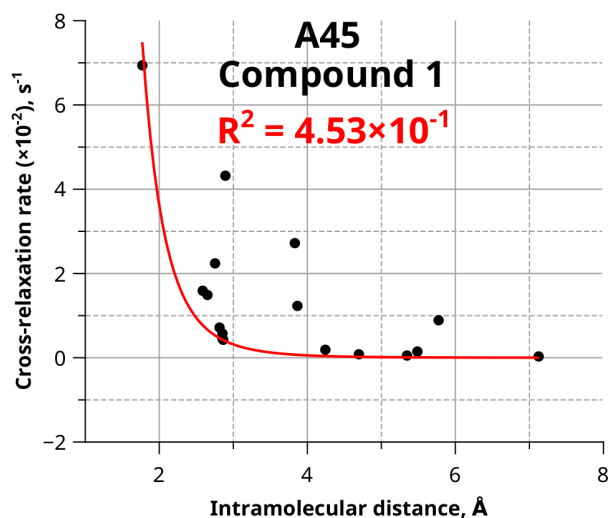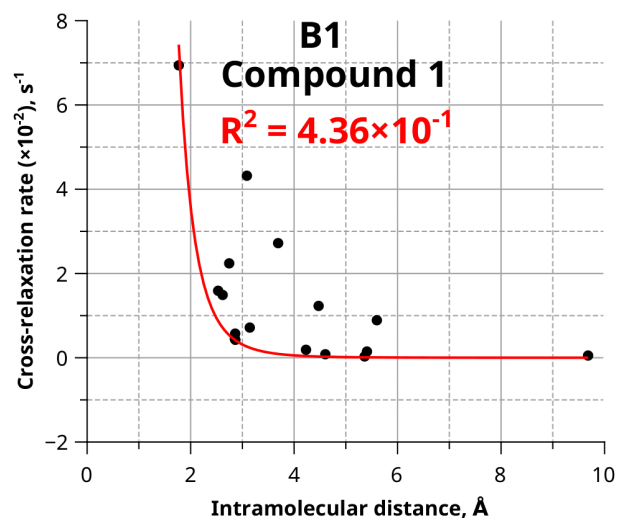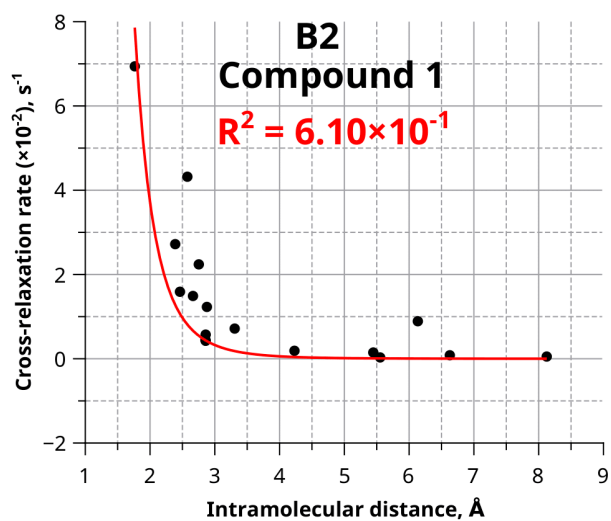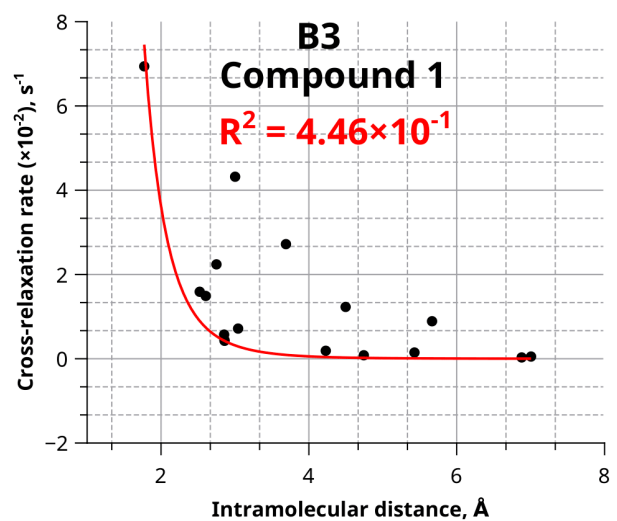

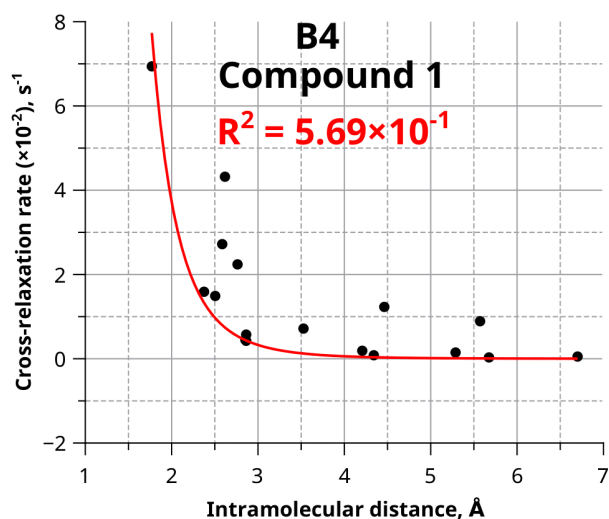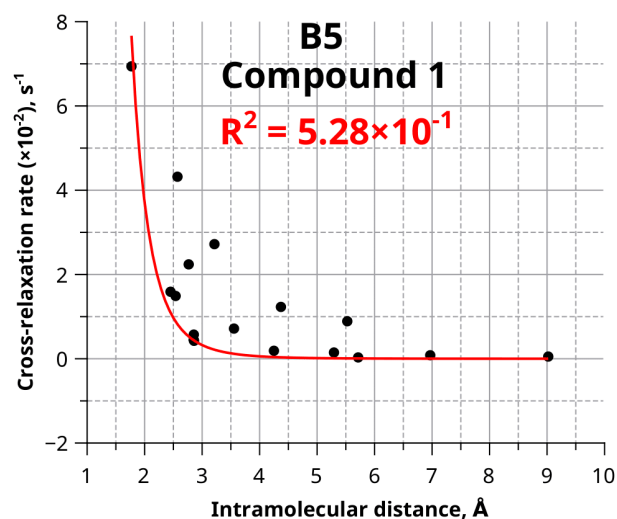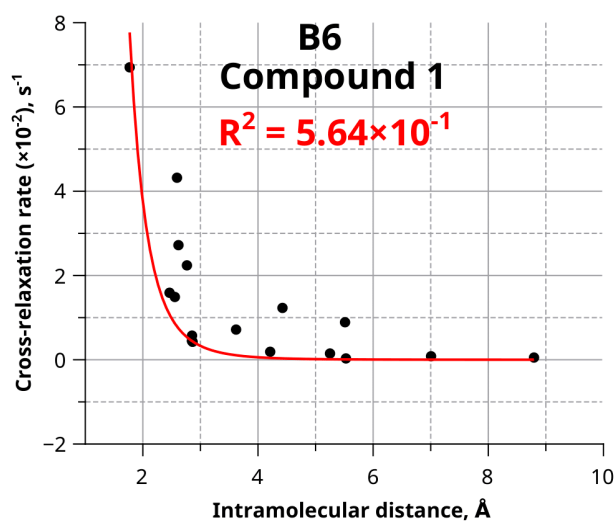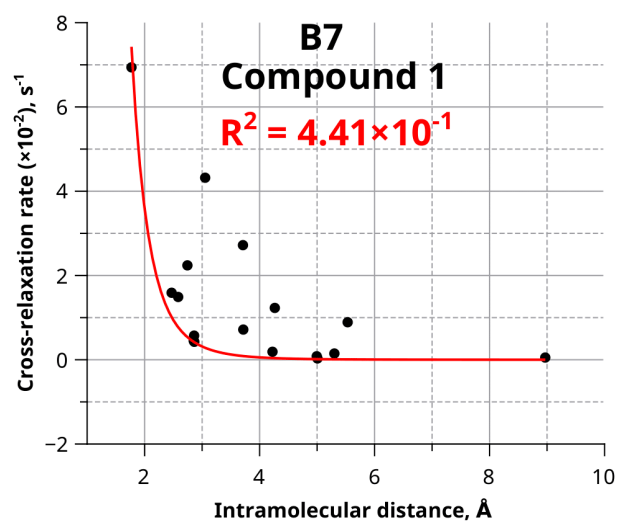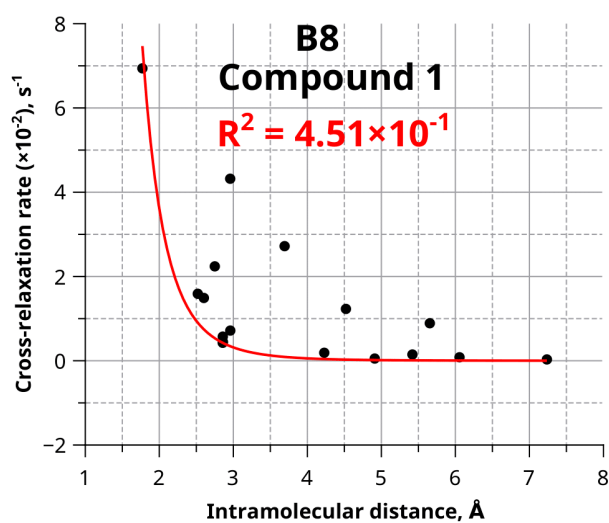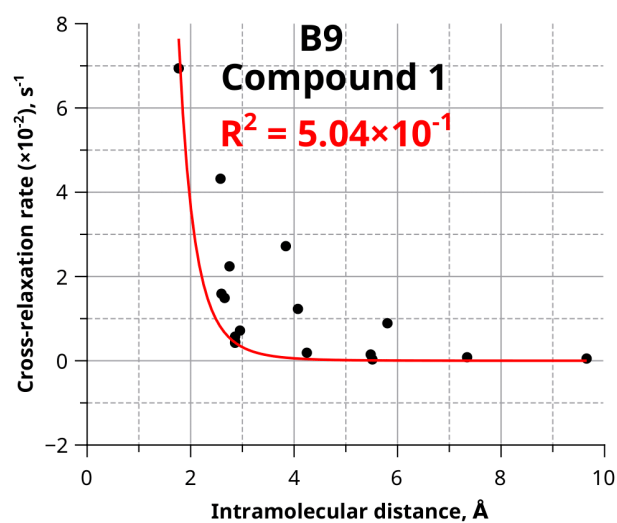

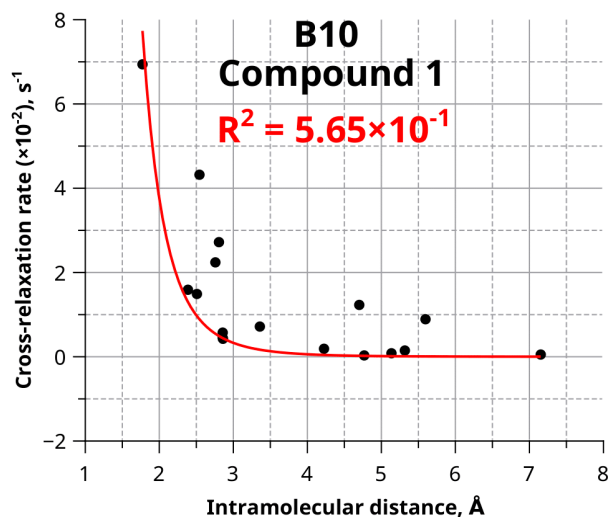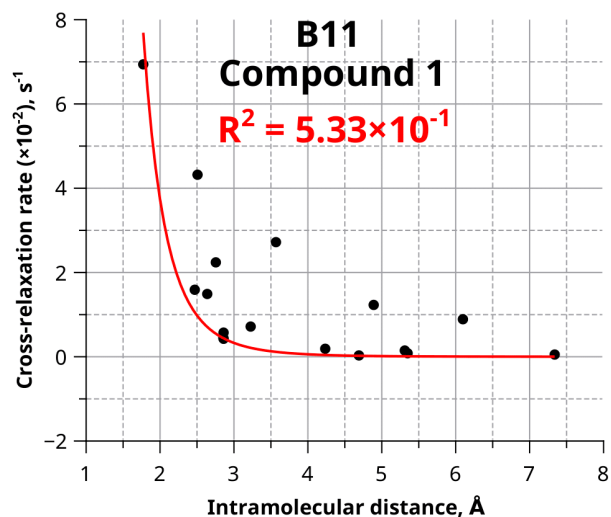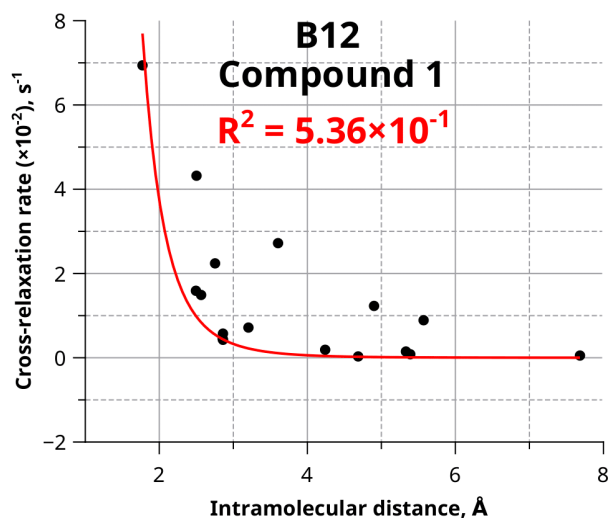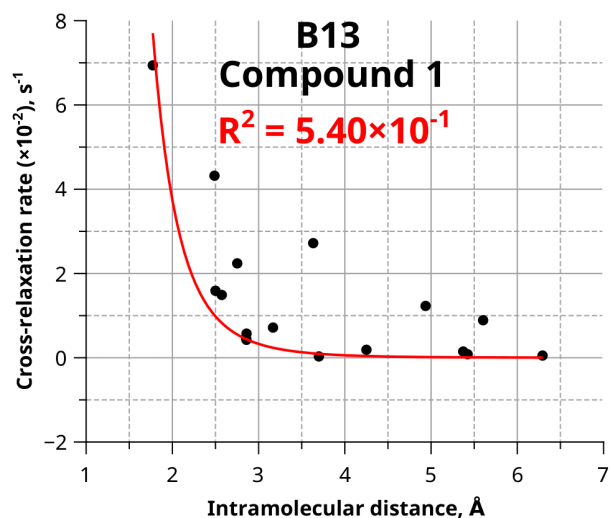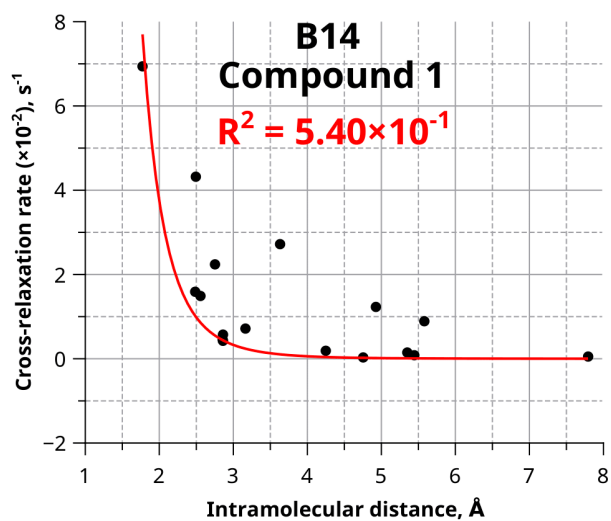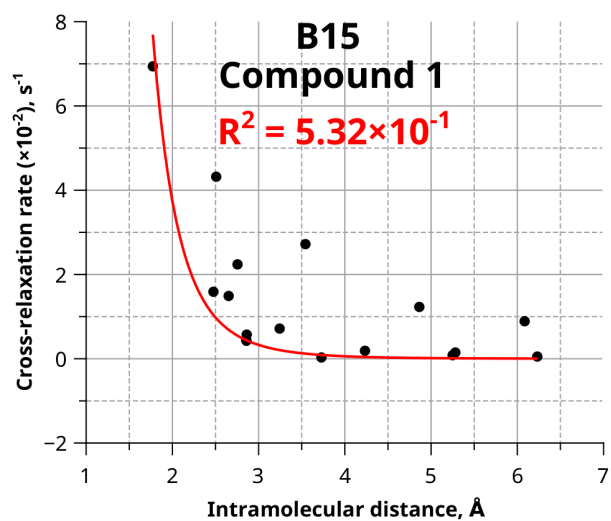

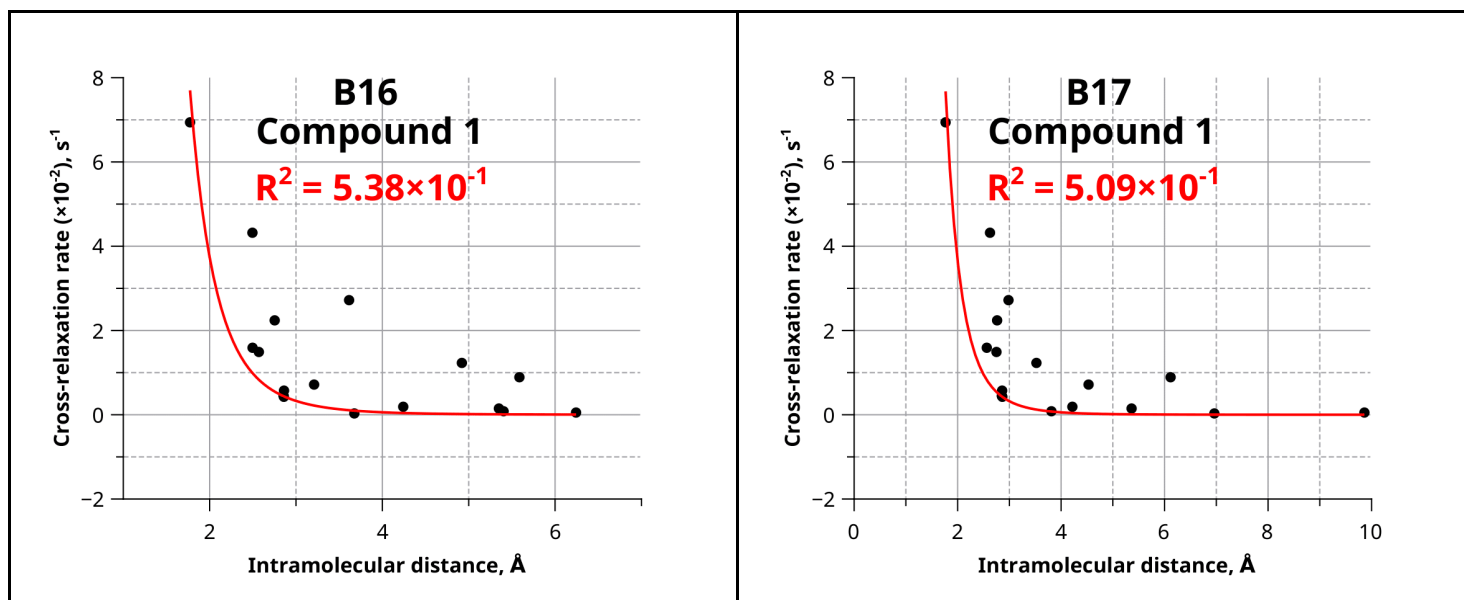

**Table S12.** Dependence of the cross-relaxation rate on the internuclear distance for conformers for compound 2.

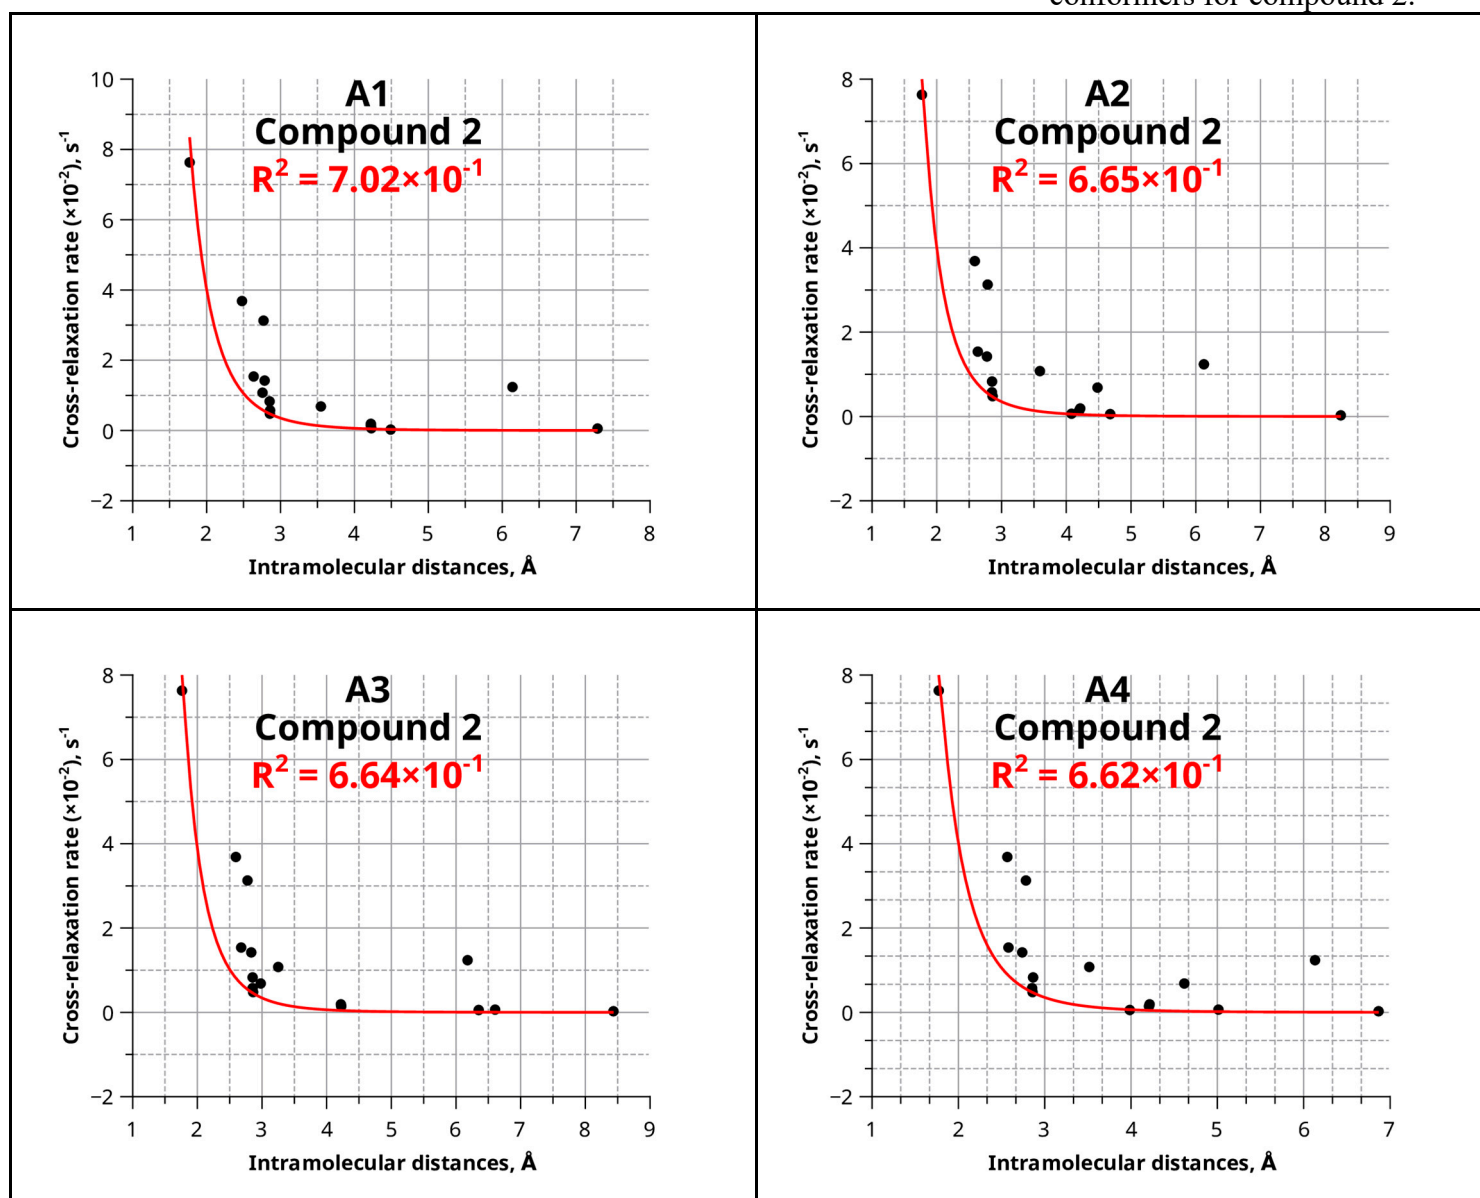

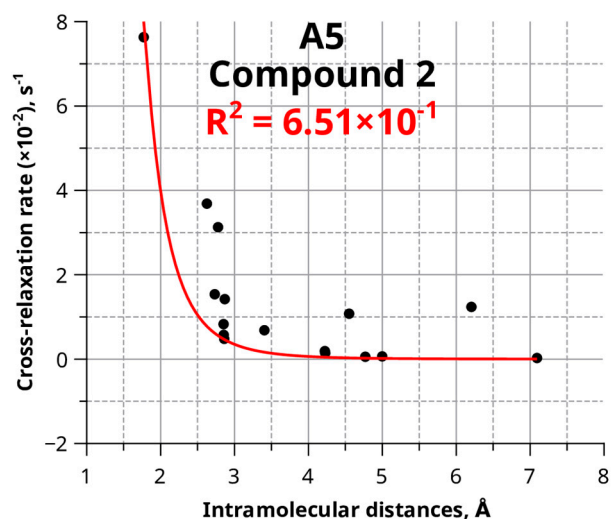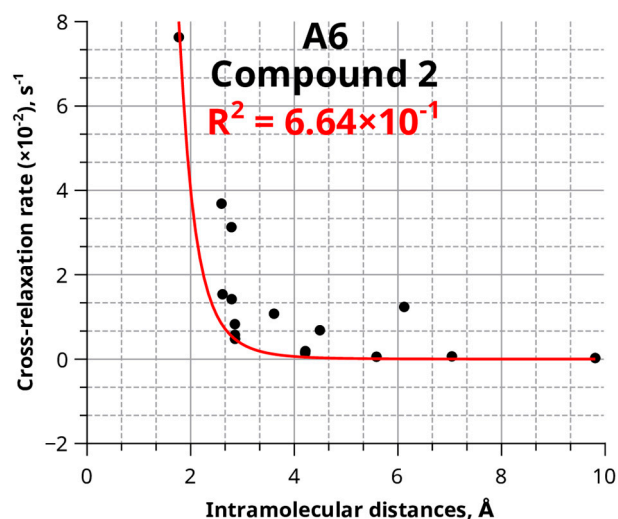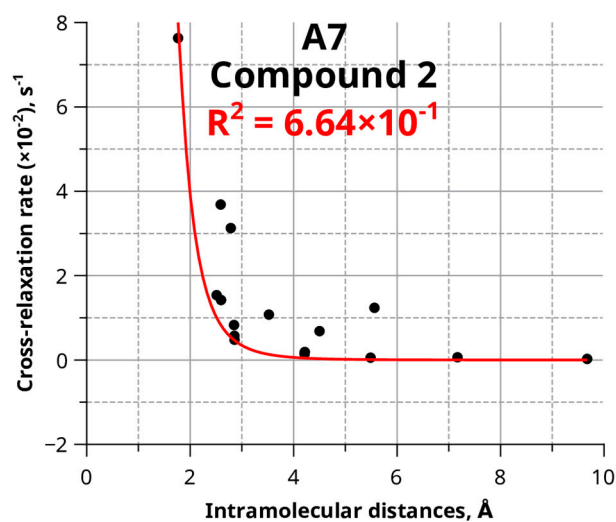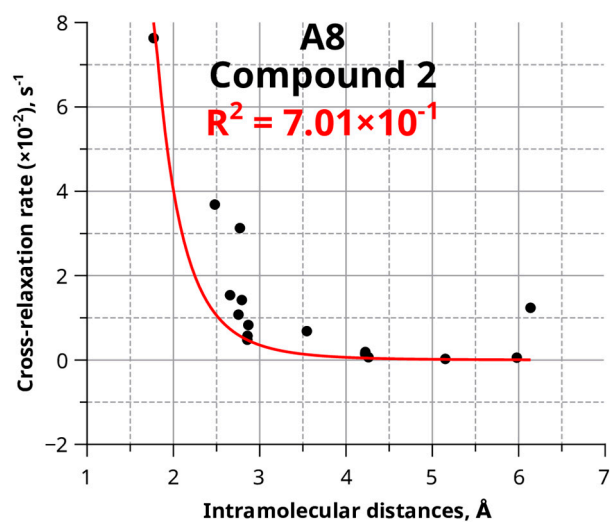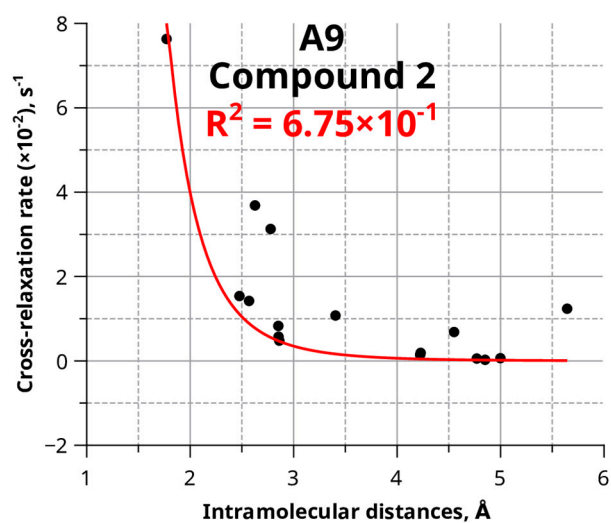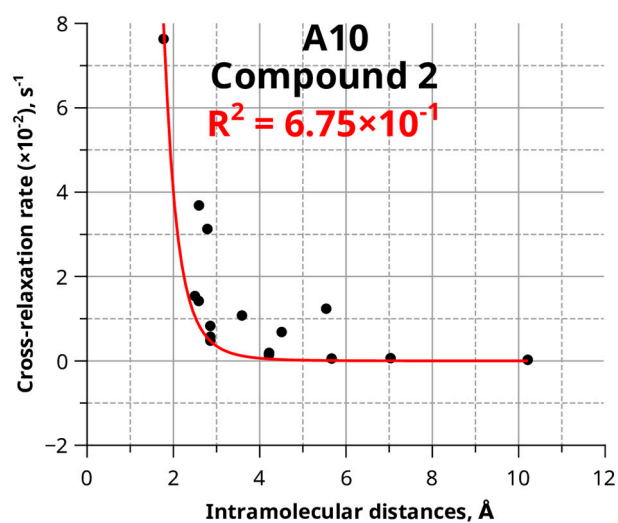



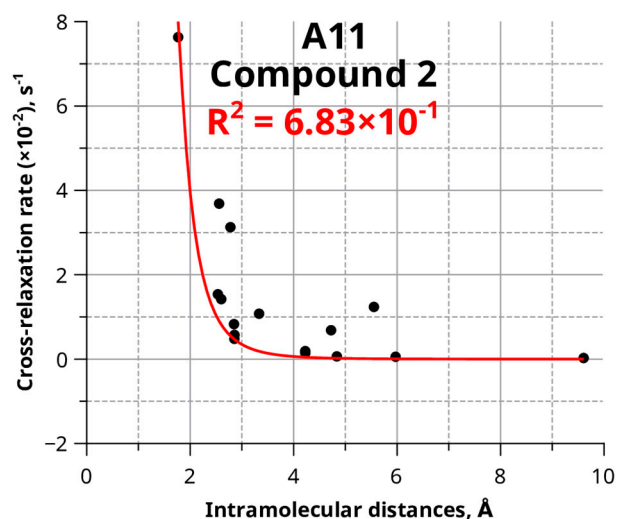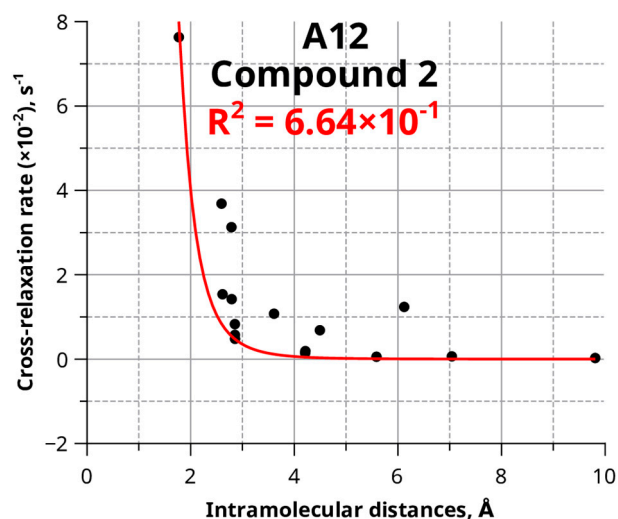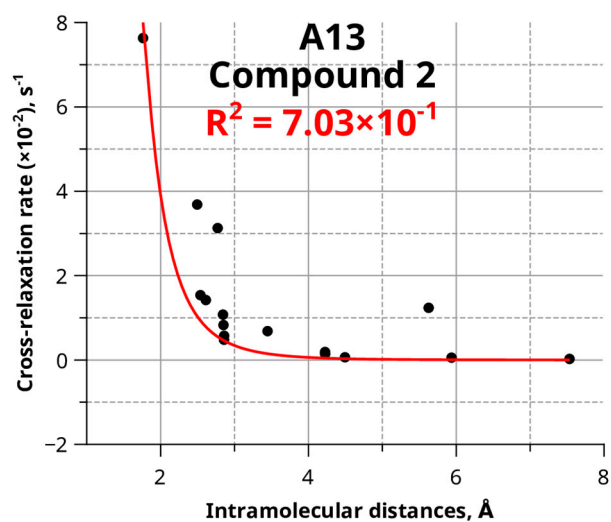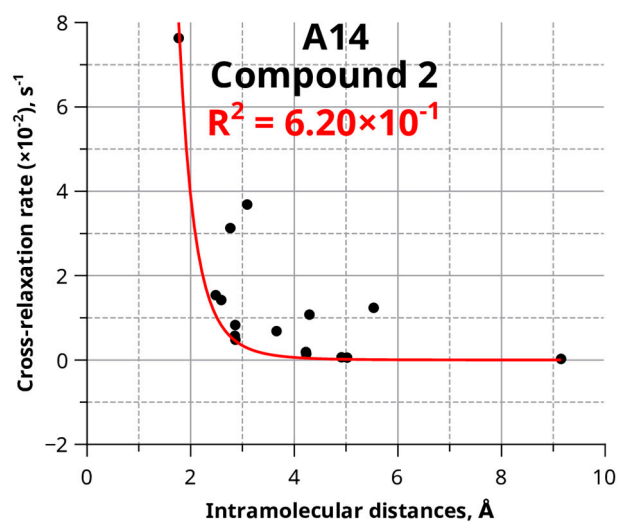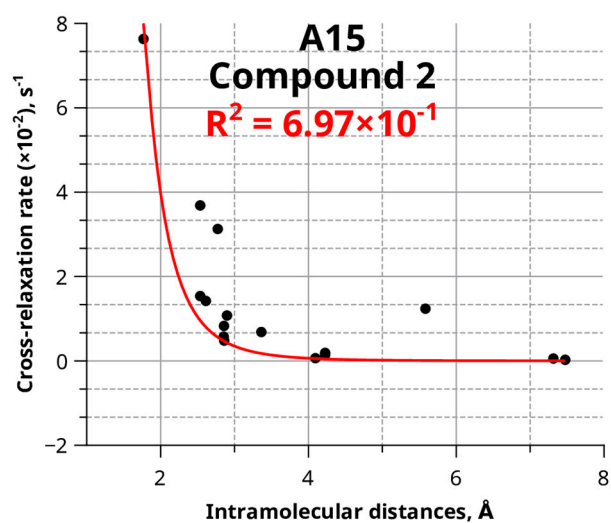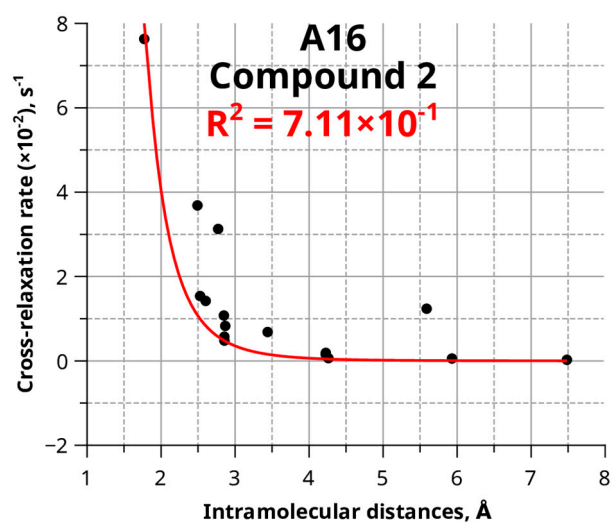

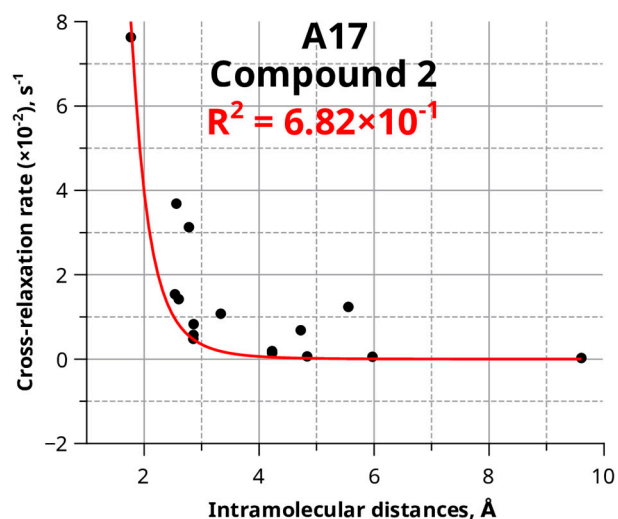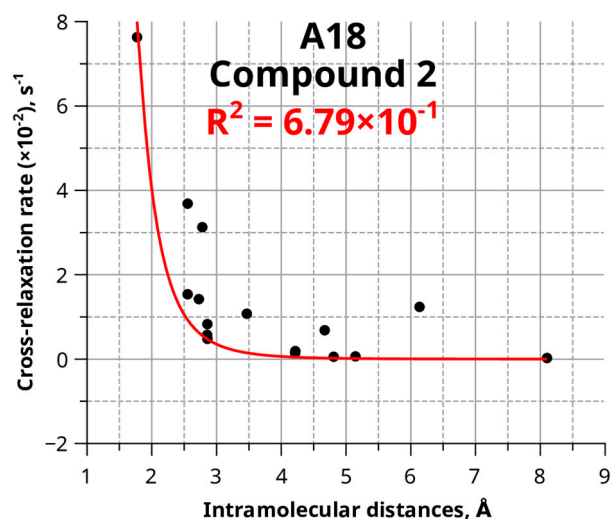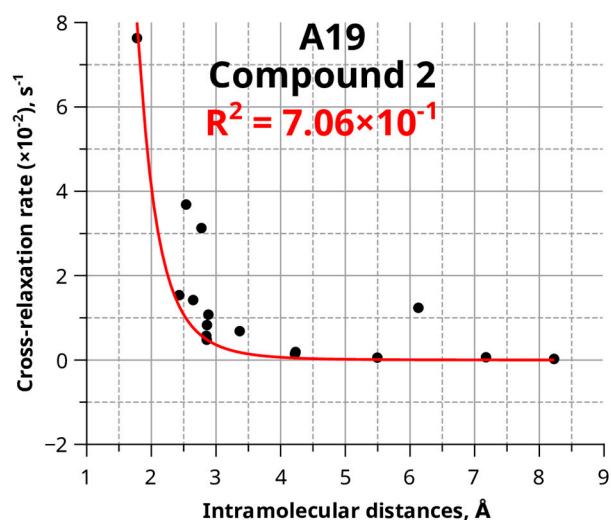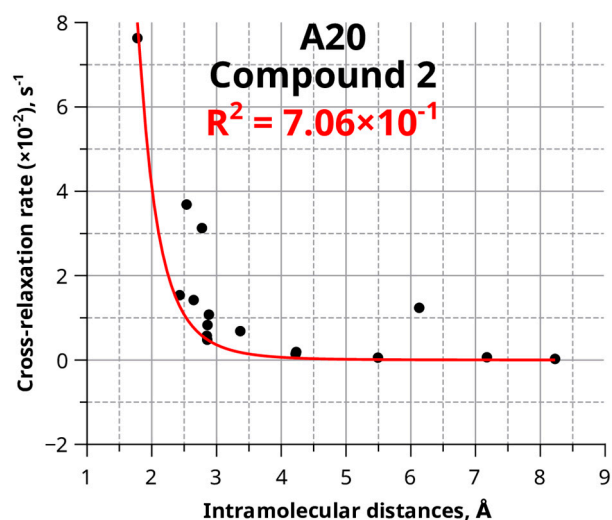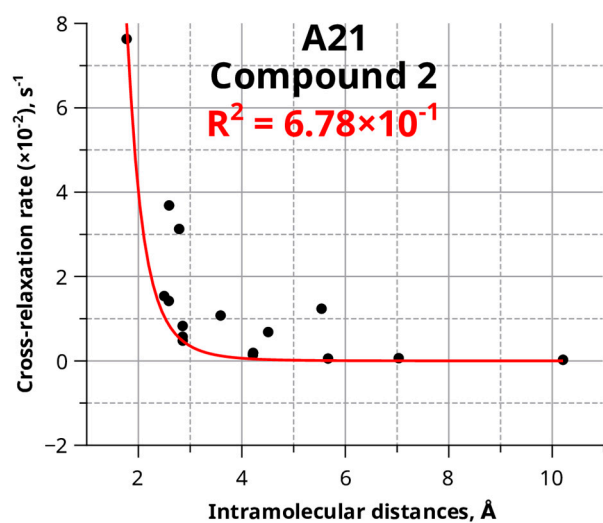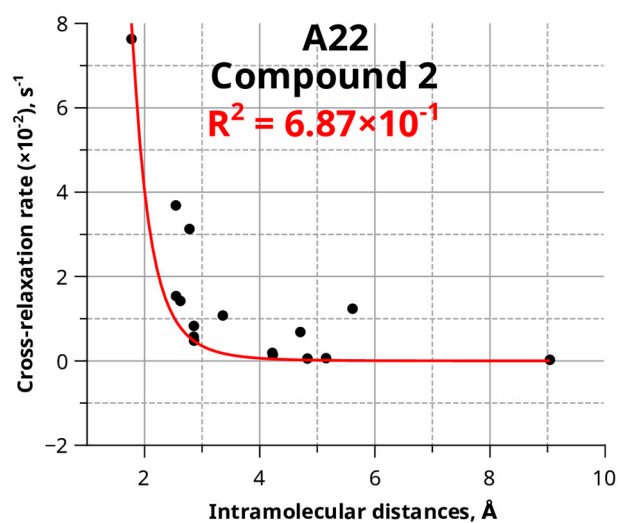



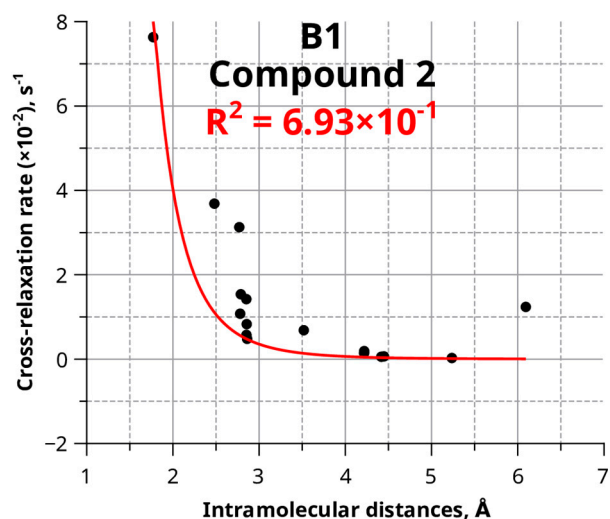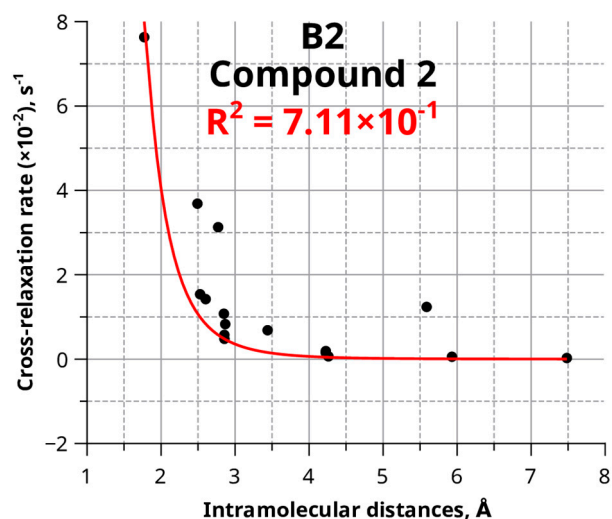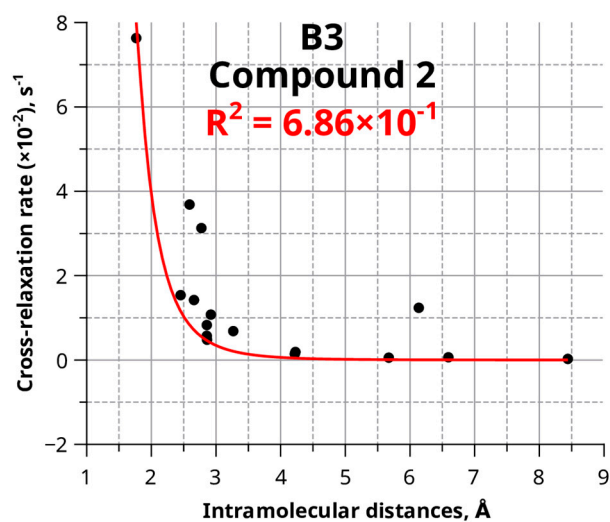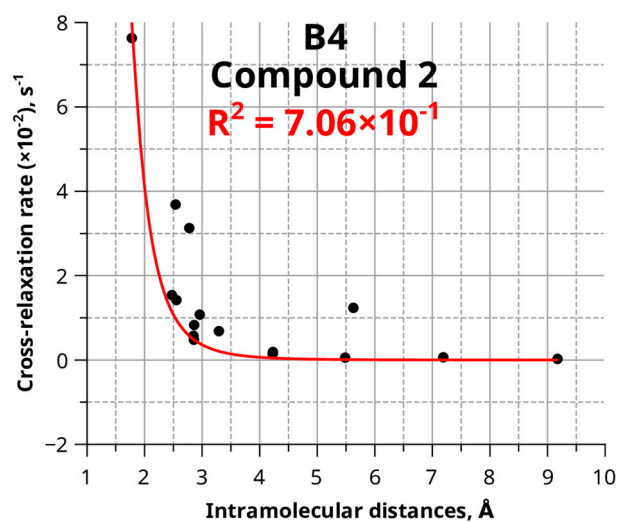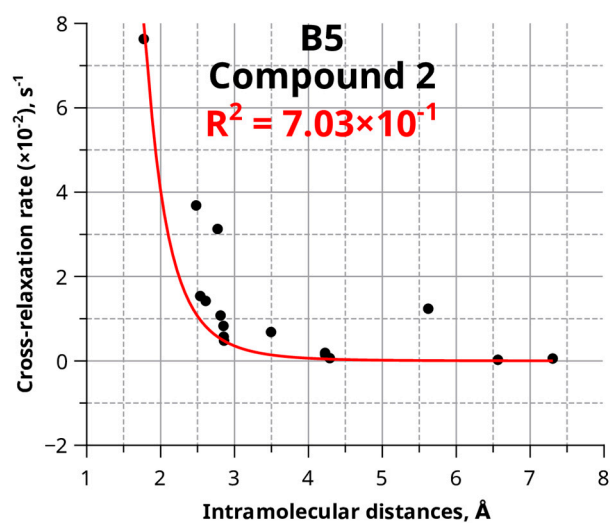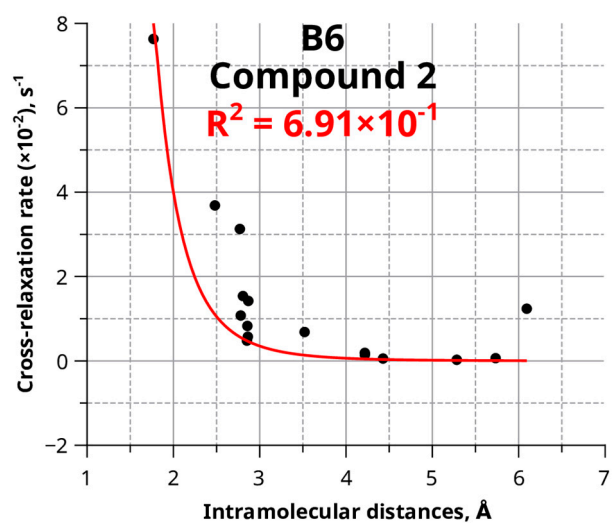

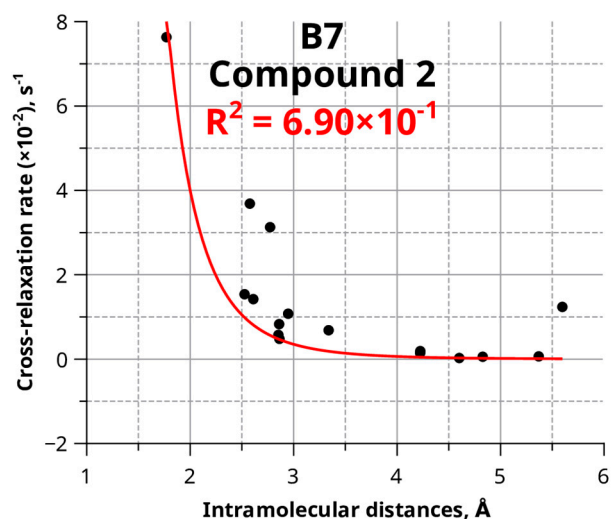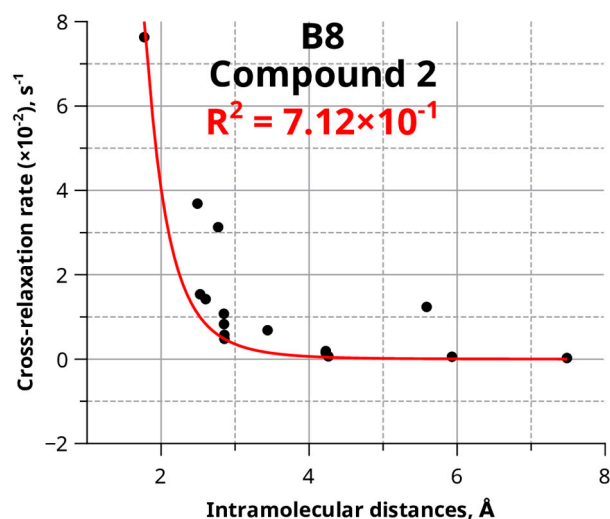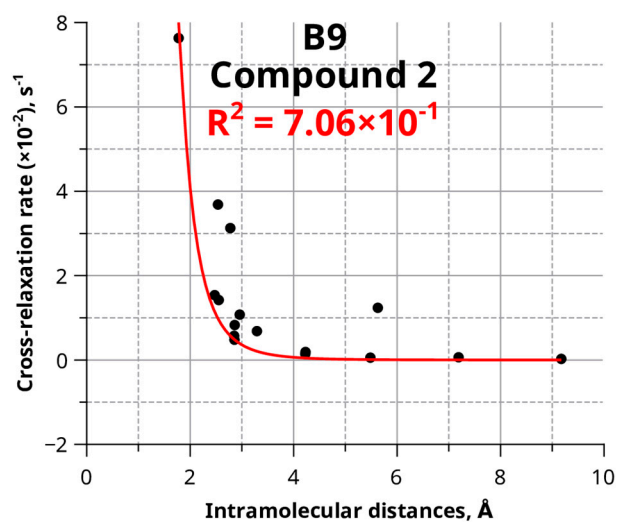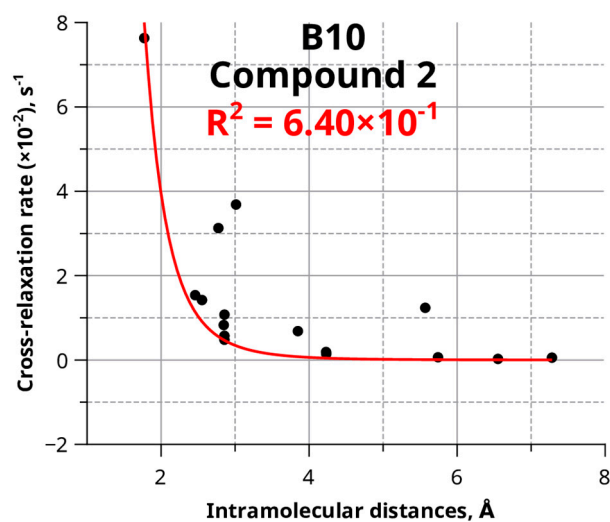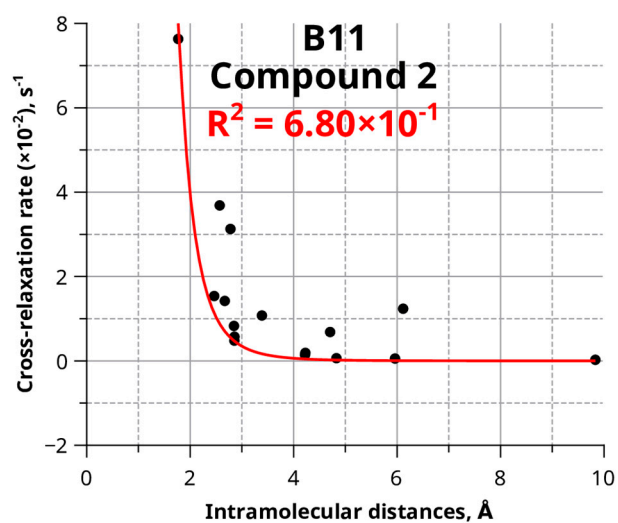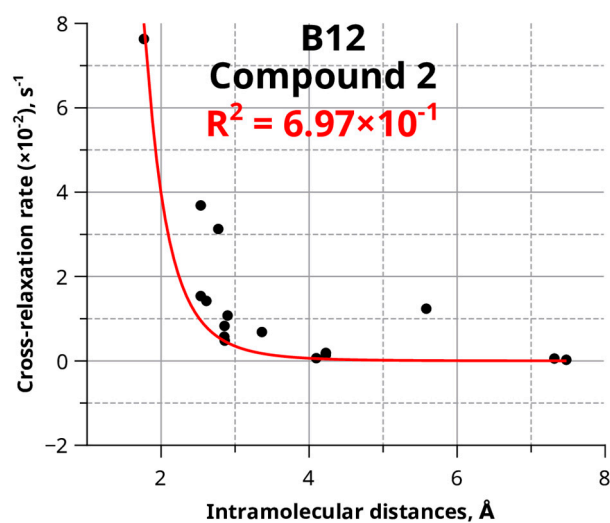

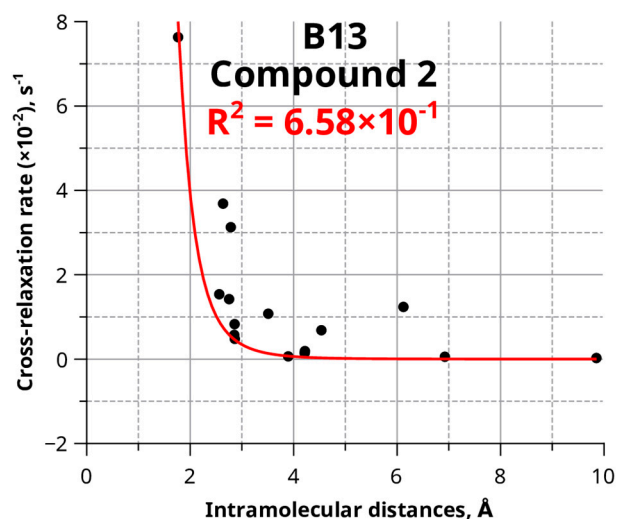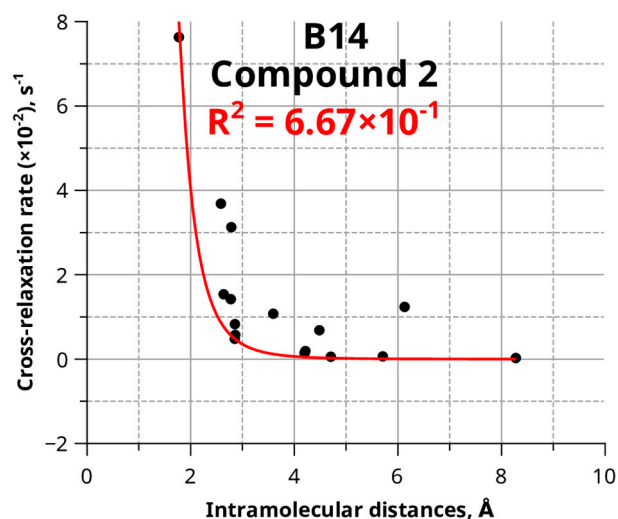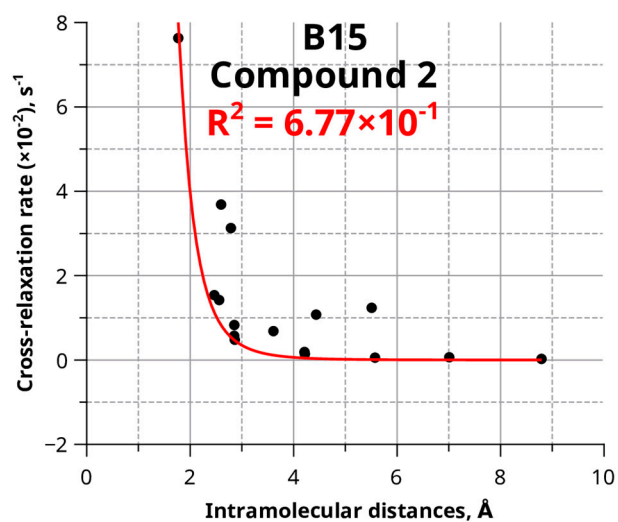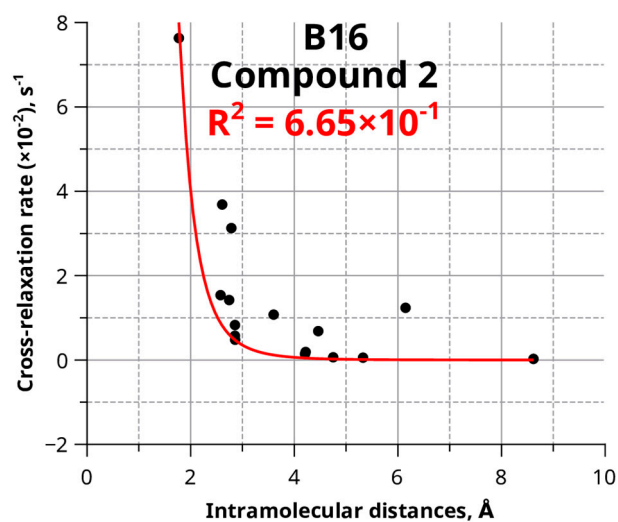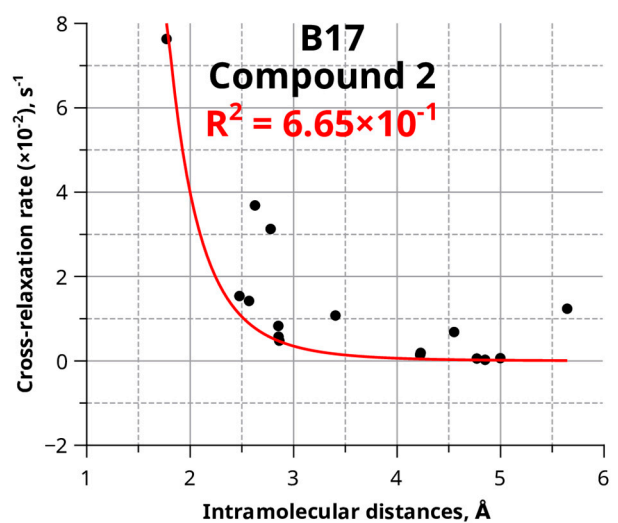

**Table S13.** Structural information in the form of XYZ for compound 1.

A1

|   |              |              |              |
|---|--------------|--------------|--------------|
| C | -1.279845000 | 2.636155000  | 0.148521000  |
| C | -2.279201000 | 1.527098000  | -0.017577000 |
| H | 0.537562000  | -3.747560000 | -4.850084000 |
| C | -0.741171000 | -2.963407000 | -1.811525000 |
| C | -0.638692000 | -3.560137000 | -3.062382000 |
| C | 0.454125000  | -3.285646000 | -3.875464000 |
| C | 1.441954000  | -2.417728000 | -3.425289000 |
| C | 1.338272000  | -1.822169000 | -2.173560000 |
| C | 0.239385000  | -2.082796000 | -1.349144000 |
| H | -1.592866000 | -3.188566000 | -1.181502000 |
| H | -1.410240000 | -4.239821000 | -3.399183000 |
| H | 2.300256000  | -2.204050000 | -4.048382000 |
| H | 2.125282000  | -1.164975000 | -1.831766000 |
| N | -0.383863000 | -0.017901000 | 0.017449000  |
| C | -1.782653000 | 0.143118000  | -0.354960000 |
| C | 0.140897000  | 2.340511000  | -0.215027000 |
| C | 0.447164000  | 0.946754000  | -0.701698000 |
| C | 1.006508000  | 3.367916000  | -0.151020000 |
| C | 0.059608000  | -1.416632000 | 0.011611000  |
| P | 1.523322000  | -1.623246000 | 1.117486000  |
| O | 0.859385000  | -1.320451000 | 2.535384000  |
| O | 1.768156000  | -3.211650000 | 1.179556000  |
| C | 1.671583000  | -1.077516000 | 3.710152000  |

|   |              |              |              |
|---|--------------|--------------|--------------|
| C | 0.805768000  | -0.402072000 | 4.749416000  |
| C | 2.863531000  | -3.865609000 | 0.492172000  |
| C | 3.396529000  | -4.975710000 | 1.371512000  |
| H | 2.048678000  | -2.037150000 | 4.068963000  |
| H | 2.519187000  | -0.452874000 | 3.428125000  |
| H | 3.631608000  | -3.126016000 | 0.270508000  |
| H | 2.474086000  | -4.258794000 | -0.447275000 |
| H | 4.191119000  | -5.510659000 | 0.848576000  |
| H | 3.805923000  | -4.575791000 | 2.299120000  |
| H | 2.609360000  | -5.687730000 | 1.619049000  |
| H | -0.043823000 | -1.030527000 | 5.015788000  |
| H | 1.390831000  | -0.213522000 | 5.650842000  |
| H | 0.429047000  | 0.549364000  | 4.376010000  |
| H | -1.930517000 | -0.061701000 | -1.430854000 |
| H | 0.261220000  | 0.896579000  | -1.789024000 |
| O | 2.741666000  | -0.842189000 | 0.778780000  |
| H | -2.376868000 | -0.591649000 | 0.190613000  |
| H | 1.487889000  | 0.700136000  | -0.546662000 |
| H | -0.713961000 | -1.974379000 | 0.543476000  |
| C | 3.373164000  | 2.439231000  | -0.193889000 |
| C | 4.254623000  | 4.845654000  | -1.280665000 |
| C | 5.163641000  | 3.821063000  | -1.041562000 |
| C | 4.717192000  | 2.626284000  | -0.487667000 |
| H | 3.071741000  | 1.509867000  | 0.266287000  |
| H | 4.591006000  | 5.786067000  | -1.696844000 |

|   |              |              |              |
|---|--------------|--------------|--------------|
| H | 6.212028000  | 3.957658000  | -1.271417000 |
| H | 5.419072000  | 1.831289000  | -0.273303000 |
| C | 2.440218000  | 3.455831000  | -0.447158000 |
| C | 2.914461000  | 4.668355000  | -0.972250000 |
| H | 2.212871000  | 5.474278000  | -1.146385000 |
| H | 0.548941000  | 4.310896000  | 0.130954000  |
| C | -3.570347000 | 1.852661000  | 0.181226000  |
| C | -4.924030000 | -0.133248000 | -0.639425000 |
| C | -4.787592000 | 1.051347000  | 0.102338000  |
| C | -6.126984000 | -0.825372000 | -0.662255000 |
| C | -5.916660000 | 1.518172000  | 0.796849000  |
| C | -7.112753000 | 0.819045000  | 0.784827000  |
| C | -7.222849000 | -0.360267000 | 0.055447000  |
| H | -6.210910000 | -1.729436000 | -1.250845000 |
| H | -5.839324000 | 2.441205000  | 1.356805000  |
| H | -7.962484000 | 1.197481000  | 1.337229000  |
| H | -8.157371000 | -0.904694000 | 0.036528000  |
| H | -3.725058000 | 2.882295000  | 0.484901000  |
| H | -4.102483000 | -0.498951000 | -1.235074000 |
| O | -1.624168000 | 3.738093000  | 0.548915000  |

A2

|   |             |              |              |
|---|-------------|--------------|--------------|
| C | 1.060682000 | -2.620608000 | -0.386543000 |
| C | 2.166777000 | -1.613514000 | -0.286118000 |
| H | 1.029640000 | 5.177167000  | -3.377636000 |

|   |              |              |              |
|---|--------------|--------------|--------------|
| C | 1.395369000  | 3.472072000  | -0.472532000 |
| C | 1.629297000  | 4.424051000  | -1.457318000 |
| C | 0.850102000  | 4.439755000  | -2.606808000 |
| C | -0.167136000 | 3.504127000  | -2.756157000 |
| C | -0.405789000 | 2.559684000  | -1.765603000 |
| C | 0.379079000  | 2.524719000  | -0.609270000 |
| H | 2.004721000  | 3.470996000  | 0.422541000  |
| H | 2.418421000  | 5.152193000  | -1.324299000 |
| H | -0.784584000 | 3.513163000  | -3.644726000 |
| H | -1.220215000 | 1.862856000  | -1.888517000 |
| N | 0.443799000  | 0.076826000  | 0.161449000  |
| C | 1.819429000  | -0.146358000 | -0.270174000 |
| C | -0.328242000 | -2.097116000 | -0.589041000 |
| C | -0.487078000 | -0.604292000 | -0.734675000 |
| C | -1.309138000 | -3.007546000 | -0.698076000 |
| C | 0.188684000  | 1.483393000  | 0.491744000  |
| P | -1.359290000 | 1.765474000  | 1.474521000  |
| O | -2.544164000 | 1.777072000  | 0.395946000  |
| O | -1.683733000 | 0.393795000  | 2.251246000  |
| C | -3.828146000 | 2.369661000  | 0.726945000  |
| C | -4.561573000 | 2.666323000  | -0.561413000 |
| C | -0.955987000 | 0.030238000  | 3.450667000  |
| C | -1.763531000 | -1.001371000 | 4.206287000  |
| H | -3.652377000 | 3.273671000  | 1.308815000  |
| H | -4.380366000 | 1.659293000  | 1.344541000  |

|   |              |              |              |
|---|--------------|--------------|--------------|
| H | 0.010990000  | -0.374313000 | 3.146954000  |
| H | -0.797417000 | 0.927558000  | 4.049466000  |
| H | -1.224571000 | -1.302992000 | 5.105654000  |
| H | -2.729508000 | -0.594531000 | 4.504782000  |
| H | -1.931989000 | -1.887575000 | 3.595153000  |
| H | -4.005767000 | 3.382098000  | -1.166256000 |
| H | -4.710379000 | 1.757699000  | -1.144581000 |
| H | -5.539698000 | 3.094039000  | -0.335961000 |
| H | 1.994493000  | 0.294494000  | -1.267137000 |
| H | -1.500764000 | -0.296967000 | -0.511785000 |
| O | -1.249386000 | 2.960380000  | 2.339178000  |
| H | 2.486498000  | 0.372914000  | 0.419778000  |
| H | -0.297846000 | -0.332931000 | -1.787901000 |
| H | 0.928029000  | 1.728260000  | 1.260003000  |
| C | -3.425800000 | -3.683059000 | -1.767575000 |
| C | -4.885924000 | -1.802813000 | -0.351605000 |
| C | -5.531063000 | -2.633401000 | -1.260930000 |
| C | -4.794240000 | -3.576882000 | -1.968454000 |
| H | -2.859358000 | -4.430644000 | -2.308105000 |
| H | -5.456675000 | -1.086847000 | 0.225095000  |
| H | -6.600387000 | -2.556961000 | -1.405625000 |
| H | -5.287604000 | -4.238371000 | -2.668138000 |
| C | -2.755341000 | -2.828481000 | -0.881227000 |
| C | -3.512979000 | -1.893722000 | -0.163683000 |
| H | -3.035042000 | -1.262250000 | 0.571432000  |



|   |              |              |              |
|---|--------------|--------------|--------------|
| H | -0.970920000 | -4.038852000 | -0.676320000 |
| C | 3.416839000  | -2.106453000 | -0.188875000 |
| C | 4.972258000  | -0.124067000 | -0.503746000 |
| C | 4.708696000  | -1.436975000 | -0.080189000 |
| C | 6.237772000  | 0.428513000  | -0.364465000 |
| C | 5.775397000  | -2.172984000 | 0.463828000  |
| C | 7.034477000  | -1.615295000 | 0.615541000  |
| C | 7.271007000  | -0.307922000 | 0.203484000  |
| H | 6.418872000  | 1.438344000  | -0.707984000 |
| H | 5.598971000  | -3.194356000 | 0.775586000  |
| H | 7.834309000  | -2.201996000 | 1.047226000  |
| H | 8.254617000  | 0.128694000  | 0.312798000  |
| H | 3.463936000  | -3.189459000 | -0.153406000 |
| H | 4.200002000  | 0.460279000  | -0.978541000 |
| O | 1.284950000  | -3.819077000 | -0.310742000 |

A3

|   |              |              |              |
|---|--------------|--------------|--------------|
| C | 1.033067000  | -2.645700000 | -0.354131000 |
| C | 2.131586000  | -1.627830000 | -0.286135000 |
| H | 1.009919000  | 5.115747000  | -3.441033000 |
| C | -0.422391000 | 2.501810000  | -1.820378000 |
| C | -0.175809000 | 3.434558000  | -2.819945000 |
| C | 0.824101000  | 4.387565000  | -2.662928000 |
| C | 1.577796000  | 4.400904000  | -1.496581000 |
| C | 1.336195000  | 3.460406000  | -0.502612000 |
| C | 0.337040000  | 2.496298000  | -0.646783000 |

|   |              |              |              |
|---|--------------|--------------|--------------|
| H | -1.223548000 | 1.791024000  | -1.949960000 |
| H | -0.773530000 | 3.420869000  | -3.721836000 |
| H | 2.353195000  | 5.142570000  | -1.357683000 |
| H | 1.926195000  | 3.481538000  | 0.405066000  |
| N | 0.399928000  | 0.059338000  | 0.150385000  |
| C | 1.773345000  | -0.162845000 | -0.286056000 |
| C | -0.363529000 | -2.136268000 | -0.537099000 |
| C | -0.534792000 | -0.648967000 | -0.718992000 |
| C | -1.341977000 | -3.053356000 | -0.593898000 |
| C | 0.140311000  | 1.466736000  | 0.465461000  |
| P | -1.412368000 | 1.774674000  | 1.431322000  |
| O | -2.570329000 | 1.746343000  | 0.321972000  |
| O | -1.730066000 | 0.436010000  | 2.265405000  |
| C | -3.894545000 | 2.247773000  | 0.639284000  |
| C | -4.637854000 | 2.482700000  | -0.656203000 |
| C | -1.427086000 | 0.314572000  | 3.679029000  |
| C | -0.159160000 | -0.481994000 | 3.906658000  |
| H | -3.788761000 | 3.167313000  | 1.214299000  |
| H | -4.401398000 | 1.505295000  | 1.258445000  |
| H | -1.360256000 | 1.313862000  | 4.107533000  |
| H | -2.288393000 | -0.192933000 | 4.111918000  |
| H | -0.011309000 | -0.629166000 | 4.978240000  |
| H | -0.218953000 | -1.458577000 | 3.428378000  |
| H | 0.714047000  | 0.038625000  | 3.514174000  |
| H | -4.125731000 | 3.227013000  | -1.265093000 |

|   |              |              |              |
|---|--------------|--------------|--------------|
| H | -4.723537000 | 1.560178000  | -1.230067000 |
| H | -5.643173000 | 2.848127000  | -0.441040000 |
| H | 1.941594000  | 0.265474000  | -1.289835000 |
| H | -1.548966000 | -0.343783000 | -0.495016000 |
| O | -1.326043000 | 3.000028000  | 2.256299000  |
| H | 2.441524000  | 0.369279000  | 0.393127000  |
| H | -0.358201000 | -0.404338000 | -1.781211000 |
| H | 0.874605000  | 1.721317000  | 1.235734000  |
| C | -3.490028000 | -3.730079000 | -1.605473000 |
| C | -4.907348000 | -1.857238000 | -0.136666000 |
| C | -5.579782000 | -2.684883000 | -1.028740000 |
| C | -4.864303000 | -3.624428000 | -1.762899000 |
| H | -2.940148000 | -4.474426000 | -2.167138000 |
| H | -5.460858000 | -1.144284000 | 0.460385000  |
| H | -6.653193000 | -2.609178000 | -1.139629000 |
| H | -5.378622000 | -4.283380000 | -2.449792000 |
| C | -2.793726000 | -2.878552000 | -0.736809000 |
| C | -3.528961000 | -1.947504000 | 0.007852000  |
| H | -3.026355000 | -1.318274000 | 0.728710000  |
| H | -1.000211000 | -4.082968000 | -0.553572000 |
| C | 3.386908000  | -2.110062000 | -0.202780000 |
| C | 4.924146000  | -0.119851000 | -0.559526000 |
| C | 4.676303000  | -1.431933000 | -0.123953000 |
| C | 6.189470000  | 0.439683000  | -0.449347000 |
| C | 5.757845000  | -2.159286000 | 0.402345000  |

|   |             |              |              |
|---|-------------|--------------|--------------|
| C | 7.016963000 | -1.594675000 | 0.524893000  |
| C | 7.238116000 | -0.288465000 | 0.100796000  |
| H | 6.358204000 | 1.448649000  | -0.801608000 |
| H | 5.592942000 | -3.179729000 | 0.723318000  |
| H | 7.828528000 | -2.174991000 | 0.943099000  |
| H | 8.221531000 | 0.153731000  | 0.187133000  |
| H | 3.442076000 | -3.192176000 | -0.154322000 |
| H | 4.139226000 | 0.458342000  | -1.020683000 |
| O | 1.268460000 | -3.841227000 | -0.266535000 |

#### A4

|   |              |              |              |
|---|--------------|--------------|--------------|
| C | -0.991415000 | 2.622987000  | -0.086010000 |
| C | -2.095709000 | 1.617251000  | -0.202352000 |
| H | -0.232356000 | -4.692851000 | -4.076557000 |
| C | -1.142807000 | -3.316632000 | -1.117075000 |
| C | -1.195912000 | -4.133462000 | -2.239858000 |
| C | -0.195543000 | -4.059206000 | -3.200573000 |
| C | 0.858287000  | -3.170851000 | -3.022523000 |
| C | 0.912830000  | -2.360246000 | -1.895498000 |
| C | -0.093478000 | -2.415544000 | -0.926866000 |
| H | -1.923924000 | -3.386951000 | -0.370295000 |
| H | -2.016451000 | -4.828201000 | -2.360794000 |
| H | 1.648136000  | -3.114194000 | -3.759985000 |
| H | 1.756253000  | -1.701338000 | -1.758827000 |
| N | -0.376652000 | -0.084146000 | 0.084820000  |

|   |              |              |              |
|---|--------------|--------------|--------------|
| C | -1.721169000 | 0.173198000  | -0.416503000 |
| C | 0.390711000  | 2.160052000  | -0.427216000 |
| C | 0.605381000  | 0.687016000  | -0.668083000 |
| C | 1.348798000  | 3.104078000  | -0.470898000 |
| C | -0.110903000 | -1.509532000 | 0.302658000  |
| P | 1.274301000  | -1.863741000 | 1.481953000  |
| O | 2.597498000  | -1.516489000 | 0.644986000  |
| O | 1.276842000  | -0.689446000 | 2.577704000  |
| C | 3.913117000  | -1.725435000 | 1.225587000  |
| C | 4.462096000  | -3.089280000 | 0.861039000  |
| C | 0.684459000  | -0.845155000 | 3.889587000  |
| C | -0.632753000 | -0.102417000 | 3.980864000  |
| H | 4.528764000  | -0.922342000 | 0.823728000  |
| H | 3.852868000  | -1.595517000 | 2.306612000  |
| H | 1.412096000  | -0.430257000 | 4.586778000  |
| H | 0.569708000  | -1.907751000 | 4.102327000  |
| H | -1.378390000 | -0.531672000 | 3.311785000  |
| H | -1.017569000 | -0.163128000 | 5.000613000  |
| H | -0.505792000 | 0.947418000  | 3.720097000  |
| H | 4.515518000  | -3.207971000 | -0.221151000 |
| H | 5.469571000  | -3.198558000 | 1.267409000  |
| H | 3.832936000  | -3.878685000 | 1.268461000  |
| H | -1.808466000 | -0.098989000 | -1.483405000 |
| H | 0.544622000  | 0.464246000  | -1.748050000 |
| O | 1.181954000  | -3.225512000 | 2.054452000  |

|   |              |              |              |
|---|--------------|--------------|--------------|
| H | -2.423524000 | -0.462750000 | 0.123805000  |
| H | 1.603297000  | 0.408141000  | -0.341126000 |
| H | -0.945905000 | -1.859168000 | 0.916948000  |
| C | 3.337311000  | 2.012020000  | -1.602394000 |
| C | 4.988035000  | 3.970087000  | -0.523012000 |
| C | 5.533812000  | 2.966797000  | -1.317125000 |
| C | 4.700791000  | 1.996118000  | -1.862028000 |
| H | 2.708050000  | 1.268915000  | -2.067246000 |
| H | 5.624557000  | 4.738562000  | -0.105059000 |
| H | 6.595944000  | 2.950177000  | -1.521407000 |
| H | 5.113162000  | 1.226982000  | -2.501726000 |
| C | 2.769999000  | 3.005887000  | -0.789723000 |
| C | 3.624926000  | 3.994522000  | -0.275058000 |
| H | 3.203529000  | 4.783746000  | 0.334135000  |
| H | 1.011080000  | 4.096349000  | -0.191722000 |
| C | -3.352630000 | 2.082235000  | -0.075665000 |
| C | -4.863011000 | 0.187198000  | -0.828580000 |
| C | -4.637818000 | 1.393965000  | -0.146847000 |
| C | -6.121937000 | -0.396969000 | -0.845915000 |
| C | -5.735204000 | 1.998050000  | 0.489742000  |
| C | -6.988371000 | 1.407199000  | 0.483132000  |
| C | -7.187021000 | 0.202562000  | -0.183587000 |
| H | -6.273111000 | -1.321534000 | -1.387158000 |
| H | -5.588355000 | 2.940521000  | 1.001264000  |
| H | -7.813112000 | 1.889385000  | 0.990749000  |

|   |              |              |              |
|---|--------------|--------------|--------------|
| H | -8.165758000 | -0.257781000 | -0.197908000 |
| H | -3.415002000 | 3.141213000  | 0.150675000  |
| H | -4.064051000 | -0.280866000 | -1.382148000 |
| O | -1.216982000 | 3.780324000  | 0.234210000  |

#### A5

|   |              |              |              |
|---|--------------|--------------|--------------|
| C | 1.049495000  | 2.943556000  | 0.042486000  |
| C | 2.128469000  | 1.901603000  | 0.066220000  |
| H | 1.245651000  | -4.259971000 | 4.144071000  |
| C | -0.314979000 | -1.930503000 | 2.233347000  |
| C | 0.005041000  | -2.696178000 | 3.347122000  |
| C | 1.001949000  | -3.662923000 | 3.275545000  |
| C | 1.680045000  | -3.856546000 | 2.079367000  |
| C | 1.364804000  | -3.081454000 | 0.969534000  |
| C | 0.365322000  | -2.108648000 | 1.025276000  |
| H | -1.111033000 | -1.205787000 | 2.302844000  |
| H | -0.532213000 | -2.540864000 | 4.273422000  |
| H | 2.456090000  | -4.607213000 | 2.008494000  |
| H | 1.904684000  | -3.235484000 | 0.043336000  |
| N | 0.373615000  | 0.183641000  | -0.112758000 |
| C | 1.752105000  | 0.456040000  | 0.274716000  |
| C | -0.358805000 | 2.470710000  | 0.217649000  |
| C | -0.555169000 | 1.032167000  | 0.625556000  |
| C | -1.334547000 | 3.374326000  | 0.042388000  |
| C | 0.099722000  | -1.251088000 | -0.210935000 |

|   |              |              |              |
|---|--------------|--------------|--------------|
| P | -1.518068000 | -1.593285000 | -1.050599000 |
| O | -1.370341000 | -3.124586000 | -1.527557000 |
| O | -2.557389000 | -1.701982000 | 0.164968000  |
| C | -1.320257000 | -3.500360000 | -2.926708000 |
| C | -0.025036000 | -4.226834000 | -3.223312000 |
| C | -3.938169000 | -2.063244000 | -0.084598000 |
| C | -4.699623000 | -1.960655000 | 1.217487000  |
| H | -2.178237000 | -4.150739000 | -3.099485000 |
| H | -1.435847000 | -2.607041000 | -3.538665000 |
| H | -4.345834000 | -1.390171000 | -0.839505000 |
| H | -3.959429000 | -3.081714000 | -0.475913000 |
| H | -5.740097000 | -2.247710000 | 1.058167000  |
| H | -4.271801000 | -2.623507000 | 1.969149000  |
| H | -4.680848000 | -0.940195000 | 1.598557000  |
| H | 0.093529000  | -5.092090000 | -2.571439000 |
| H | -0.026469000 | -4.573399000 | -4.258190000 |
| H | 0.835320000  | -3.570695000 | -3.089252000 |
| H | 1.927318000  | 0.174941000  | 1.328416000  |
| H | -0.392601000 | 0.955503000  | 1.715539000  |
| O | -1.892409000 | -0.658812000 | -2.136182000 |
| H | 2.408487000  | -0.176160000 | -0.325675000 |
| H | -1.575409000 | 0.717104000  | 0.438807000  |
| H | 0.789416000  | -1.613397000 | -0.980159000 |
| C | -3.578174000 | 4.123298000  | 0.766785000  |
| C | -4.823749000 | 2.071445000  | -0.617007000 |



|   |              |              |              |
|---|--------------|--------------|--------------|
| C | -5.589793000 | 2.980399000  | 0.104192000  |
| C | -4.960636000 | 4.009463000  | 0.796640000  |
| H | -3.093736000 | 4.936032000  | 1.292982000  |
| H | -5.307076000 | 1.288512000  | -1.186800000 |
| H | -6.668603000 | 2.898594000  | 0.113034000  |
| H | -5.547676000 | 4.731065000  | 1.349313000  |
| C | -2.792883000 | 3.193442000  | 0.072676000  |
| C | -3.437917000 | 2.169628000  | -0.633194000 |
| H | -2.861363000 | 1.473386000  | -1.227758000 |
| H | -0.990762000 | 4.388259000  | -0.137683000 |
| C | 3.385463000  | 2.340186000  | -0.137213000 |
| C | 4.911020000  | 0.393064000  | 0.436347000  |
| C | 4.655732000  | 1.623160000  | -0.191068000 |
| C | 6.155070000  | -0.214032000 | 0.333114000  |
| C | 5.709632000  | 2.224955000  | -0.899640000 |
| C | 6.946299000  | 1.611156000  | -1.014125000 |
| C | 7.173931000  | 0.384194000  | -0.399204000 |
| H | 6.331350000  | -1.156352000 | 0.834795000  |
| H | 5.540300000  | 3.184604000  | -1.370698000 |
| H | 7.735922000  | 2.092313000  | -1.575677000 |
| H | 8.140587000  | -0.094742000 | -0.479093000 |
| H | 3.457636000  | 3.405358000  | -0.328710000 |
| H | 4.151309000  | -0.076406000 | 1.041360000  |
| O | 1.311512000  | 4.124103000  | -0.128222000 |

A6

|   |              |              |              |
|---|--------------|--------------|--------------|
| C | 0.916545000  | -2.599563000 | -0.070441000 |
| C | 2.051140000  | -1.632263000 | -0.212884000 |
| H | 0.288853000  | 4.771483000  | -4.004093000 |
| C | -0.871306000 | 2.453305000  | -1.815623000 |
| C | -0.820695000 | 3.272900000  | -2.936299000 |
| C | 0.254932000  | 4.130710000  | -3.133200000 |
| C | 1.280902000  | 4.165663000  | -2.197649000 |
| C | 1.231380000  | 3.339936000  | -1.081246000 |
| C | 0.160342000  | 2.469009000  | -0.872589000 |
| H | -1.730497000 | 1.818624000  | -1.663330000 |
| H | -1.630270000 | 3.247361000  | -3.653841000 |
| H | 2.118638000  | 4.836813000  | -2.333056000 |
| H | 2.032793000  | 3.379227000  | -0.353971000 |
| N | 0.393895000  | 0.120197000  | 0.111199000  |
| C | 1.717861000  | -0.177723000 | -0.422062000 |
| C | -0.453546000 | -2.094927000 | -0.402298000 |
| C | -0.629760000 | -0.613045000 | -0.623733000 |
| C | -1.434128000 | -3.014739000 | -0.459699000 |
| C | 0.181096000  | 1.551026000  | 0.347783000  |
| P | -1.156064000 | 1.942569000  | 1.569881000  |
| O | -2.520765000 | 1.673436000  | 0.768264000  |
| O | -1.177699000 | 0.749530000  | 2.644630000  |
| C | -3.788783000 | 2.006244000  | 1.392712000  |
| C | -4.877156000 | 1.907445000  | 0.348152000  |

|   |              |              |              |
|---|--------------|--------------|--------------|
| C | -0.557562000 | 0.861846000  | 3.948166000  |
| C | 0.736960000  | 0.076843000  | 4.002731000  |
| H | -3.960475000 | 1.304784000  | 2.210561000  |
| H | -3.718460000 | 3.013585000  | 1.803186000  |
| H | -0.405406000 | 1.916248000  | 4.177393000  |
| H | -1.285901000 | 0.457465000  | 4.650695000  |
| H | 1.484465000  | 0.495533000  | 3.329020000  |
| H | 1.140523000  | 0.106403000  | 5.016606000  |
| H | 0.572849000  | -0.963495000 | 3.725140000  |
| H | -4.932010000 | 0.900198000  | -0.063941000 |
| H | -5.840898000 | 2.145446000  | 0.800958000  |
| H | -4.699036000 | 2.610992000  | -0.464935000 |
| H | 1.788208000  | 0.091249000  | -1.490931000 |
| H | -0.589291000 | -0.380551000 | -1.702467000 |
| O | -0.992161000 | 3.291011000  | 2.156617000  |
| H | 2.451894000  | 0.436606000  | 0.100597000  |
| H | -1.611355000 | -0.308367000 | -0.269325000 |
| H | 1.043688000  | 1.866984000  | 0.941857000  |
| C | -3.390207000 | -1.866168000 | -1.590216000 |
| C | -5.089249000 | -3.806928000 | -0.554792000 |
| C | -5.607033000 | -2.784381000 | -1.342984000 |
| C | -4.749962000 | -1.822480000 | -1.865955000 |
| H | -2.741899000 | -1.127689000 | -2.035868000 |
| H | -5.744732000 | -4.568223000 | -0.153352000 |
| H | -6.666137000 | -2.745641000 | -1.559552000 |

|   |              |              |              |
|---|--------------|--------------|--------------|
| H | -5.140749000 | -1.038619000 | -2.501263000 |
| C | -2.850703000 | -2.881730000 | -0.785883000 |
| C | -3.729632000 | -3.860305000 | -0.292774000 |
| H | -3.329618000 | -4.665336000 | 0.310111000  |
| H | -1.120529000 | -4.017914000 | -0.191577000 |
| C | 3.294161000  | -2.138983000 | -0.112113000 |
| C | 5.690261000  | -2.130739000 | 0.400853000  |
| C | 4.599475000  | -1.494076000 | -0.214905000 |
| C | 6.961544000  | -1.581134000 | 0.363781000  |
| C | 4.848799000  | -0.298631000 | -0.907946000 |
| C | 6.125312000  | 0.244151000  | -0.955717000 |
| C | 7.184596000  | -0.386712000 | -0.313514000 |
| H | 7.781108000  | -2.087687000 | 0.855813000  |
| H | 4.053572000  | 0.192726000  | -1.446570000 |
| H | 6.294551000  | 1.160733000  | -1.505124000 |
| H | 8.177254000  | 0.041320000  | -0.351655000 |
| H | 3.325983000  | -3.198559000 | 0.117706000  |
| H | 5.524058000  | -3.065474000 | 0.920593000  |
| O | 1.108002000  | -3.760656000 | 0.257997000  |

A7

|   |             |              |              |
|---|-------------|--------------|--------------|
| C | 0.981217000 | -2.575175000 | -0.215002000 |
| C | 2.116229000 | -1.598175000 | -0.247338000 |
| H | 0.689458000 | 5.112947000  | -3.559628000 |
| C | 1.371047000 | 3.436121000  | -0.695611000 |

|   |              |              |              |
|---|--------------|--------------|--------------|
| C | 1.515892000  | 4.355393000  | -1.727121000 |
| C | 0.581430000  | 4.399611000  | -2.753604000 |
| C | -0.499131000 | 3.525468000  | -2.732510000 |
| C | -0.646002000 | 2.612327000  | -1.695523000 |
| C | 0.293655000  | 2.548724000  | -0.662538000 |
| H | 2.101582000  | 3.414899000  | 0.103331000  |
| H | 2.356177000  | 5.036927000  | -1.725869000 |
| H | -1.237947000 | 3.559858000  | -3.522381000 |
| H | -1.509678000 | 1.965695000  | -1.677691000 |
| N | 0.438971000  | 0.123141000  | 0.148517000  |
| C | 1.786264000  | -0.131397000 | -0.347486000 |
| C | -0.380517000 | -2.049131000 | -0.548576000 |
| C | -0.549253000 | -0.556142000 | -0.681392000 |
| C | -1.360541000 | -2.961167000 | -0.684766000 |
| C | 0.209970000  | 1.534583000  | 0.476414000  |
| P | -1.228334000 | 1.824091000  | 1.610531000  |
| O | -2.525708000 | 1.732653000  | 0.673590000  |
| O | -1.405119000 | 0.490776000  | 2.489988000  |
| C | -3.826165000 | 2.097392000  | 1.208333000  |
| C | -4.785368000 | 2.267101000  | 0.052393000  |
| C | -0.552731000 | 0.229523000  | 3.629533000  |
| C | -1.222466000 | -0.815553000 | 4.493763000  |
| H | -4.151459000 | 1.302185000  | 1.880373000  |
| H | -3.719733000 | 3.019162000  | 1.779967000  |
| H | 0.408730000  | -0.130984000 | 3.258746000  |

|   |              |              |              |
|---|--------------|--------------|--------------|
| H | -0.397930000 | 1.161142000  | 4.174634000  |
| H | -0.586833000 | -1.050623000 | 5.348833000  |
| H | -2.180565000 | -0.453731000 | 4.866464000  |
| H | -1.391879000 | -1.731926000 | 3.929181000  |
| H | -4.873319000 | 1.342882000  | -0.518488000 |
| H | -5.773772000 | 2.530096000  | 0.432255000  |
| H | -4.451926000 | 3.062094000  | -0.614240000 |
| H | 1.903087000  | 0.225265000  | -1.385923000 |
| H | -0.457252000 | -0.253401000 | -1.739111000 |
| O | -1.066666000 | 3.069200000  | 2.392080000  |
| H | 2.493548000  | 0.437924000  | 0.256965000  |
| H | -1.546143000 | -0.272811000 | -0.353396000 |
| H | 1.020310000  | 1.795890000  | 1.163070000  |
| C | -3.286340000 | -1.744745000 | -1.795300000 |
| C | -5.016561000 | -3.725788000 | -0.896424000 |
| C | -5.512341000 | -2.660677000 | -1.641141000 |
| C | -4.639785000 | -1.678392000 | -2.096128000 |
| H | -2.624634000 | -0.989024000 | -2.189398000 |
| H | -5.684324000 | -4.502523000 | -0.548397000 |
| H | -6.566515000 | -2.604207000 | -1.877015000 |
| H | -5.013346000 | -0.860937000 | -2.698632000 |
| C | -2.769318000 | -2.803648000 | -1.033454000 |
| C | -3.662977000 | -3.801104000 | -0.609722000 |
| H | -3.279581000 | -4.638371000 | -0.040918000 |
| H | -1.054464000 | -3.979808000 | -0.471749000 |

|   |             |              |              |
|---|-------------|--------------|--------------|
| C | 3.357681000 | -2.111589000 | -0.157559000 |
| C | 4.930792000 | -0.201960000 | -0.726395000 |
| C | 4.665456000 | -1.464194000 | -0.170881000 |
| C | 6.209935000 | 0.335556000  | -0.693734000 |
| C | 5.743447000 | -2.168865000 | 0.391468000  |
| C | 7.017241000 | -1.625736000 | 0.435040000  |
| C | 7.255869000 | -0.366575000 | -0.105800000 |
| H | 6.391844000 | 1.305673000  | -1.136898000 |
| H | 5.564539000 | -3.153381000 | 0.804155000  |
| H | 7.826369000 | -2.186741000 | 0.883246000  |
| H | 8.250383000 | 0.058129000  | -0.080839000 |
| H | 3.384886000 | -3.186952000 | -0.018796000 |
| H | 4.146965000 | 0.350579000  | -1.220250000 |
| O | 1.166973000 | -3.757628000 | 0.030240000  |

A8

|   |              |              |              |
|---|--------------|--------------|--------------|
| C | 1.211830000  | 2.906769000  | -0.039234000 |
| C | 2.245147000  | 1.819593000  | -0.006020000 |
| H | 1.208453000  | -4.268128000 | 4.132988000  |
| C | -0.293026000 | -1.877248000 | 2.251117000  |
| C | 0.024182000  | -2.648936000 | 3.361458000  |
| C | 0.966947000  | -3.666683000 | 3.266891000  |
| C | 1.593716000  | -3.905453000 | 2.051125000  |
| C | 1.281951000  | -3.124209000 | 0.944551000  |
| C | 0.336728000  | -2.100288000 | 1.023257000  |

|   |              |              |              |
|---|--------------|--------------|--------------|
| H | -1.048334000 | -1.111925000 | 2.339505000  |
| H | -0.473146000 | -2.458200000 | 4.303290000  |
| H | 2.326969000  | -4.696149000 | 1.962288000  |
| H | 1.783259000  | -3.313407000 | 0.003051000  |
| N | 0.413125000  | 0.179582000  | -0.137059000 |
| C | 1.808373000  | 0.394505000  | 0.224117000  |
| C | -0.212727000 | 2.501193000  | 0.169847000  |
| C | -0.465245000 | 1.078671000  | 0.602888000  |
| C | -1.148914000 | 3.447325000  | 0.002247000  |
| C | 0.072430000  | -1.241283000 | -0.212209000 |
| P | -1.583796000 | -1.526129000 | -0.996843000 |
| O | -1.513683000 | -3.058213000 | -1.493214000 |
| O | -2.585982000 | -1.635673000 | 0.245620000  |
| C | -1.147200000 | -3.385298000 | -2.855248000 |
| C | -1.694617000 | -4.757341000 | -3.180484000 |
| C | -3.991799000 | -1.921328000 | 0.033503000  |
| C | -4.714585000 | -1.750076000 | 1.350220000  |
| H | -1.545960000 | -2.620969000 | -3.520929000 |
| H | -0.057039000 | -3.374434000 | -2.930928000 |
| H | -4.377317000 | -1.239983000 | -0.725468000 |
| H | -4.078412000 | -2.943568000 | -0.336983000 |
| H | -5.772711000 | -1.982365000 | 1.220649000  |
| H | -4.306200000 | -2.420491000 | 2.106018000  |
| H | -4.630828000 | -0.724757000 | 1.708926000  |
| H | -2.782873000 | -4.763474000 | -3.122647000 |



|   |              |              |              |
|---|--------------|--------------|--------------|
| H | -1.403272000 | -5.040735000 | -4.193013000 |
| H | -1.307370000 | -5.504995000 | -2.488587000 |
| H | 1.989409000  | 0.116276000  | 1.277580000  |
| H | -0.289023000 | 1.010343000  | 1.691247000  |
| O | -1.964001000 | -0.566546000 | -2.057665000 |
| H | 2.425589000  | -0.272064000 | -0.380757000 |
| H | -1.500867000 | 0.805887000  | 0.435345000  |
| H | 0.724397000  | -1.641058000 | -0.997182000 |
| C | -3.331062000 | 4.330218000  | 0.755791000  |
| C | -4.716206000 | 2.308073000  | -0.535656000 |
| C | -5.415254000 | 3.275613000  | 0.177448000  |
| C | -4.716220000 | 4.289787000  | 0.823228000  |
| H | -2.791501000 | 5.131295000  | 1.244975000  |
| H | -5.254040000 | 1.535800000  | -1.070028000 |
| H | -6.496254000 | 3.250402000  | 0.215352000  |
| H | -5.250745000 | 5.056580000  | 1.368278000  |
| C | -2.613013000 | 3.341136000  | 0.070438000  |
| C | -3.328054000 | 2.333229000  | -0.589392000 |
| H | -2.804454000 | 1.592114000  | -1.178649000 |
| H | -0.760767000 | 4.440638000  | -0.200903000 |
| C | 3.518903000  | 2.201929000  | -0.219054000 |
| C | 4.963188000  | 0.192204000  | 0.355317000  |
| C | 4.759092000  | 1.434064000  | -0.268202000 |
| C | 6.183130000  | -0.462446000 | 0.255518000  |
| C | 5.839254000  | 1.996274000  | -0.969998000 |

|   |             |              |              |
|---|-------------|--------------|--------------|
| C | 7.051607000 | 1.335319000  | -1.080807000 |
| C | 7.228342000 | 0.098300000  | -0.469363000 |
| H | 6.319904000 | -1.412881000 | 0.754215000  |
| H | 5.709876000 | 2.963360000  | -1.438447000 |
| H | 7.862083000 | 1.787421000  | -1.636772000 |
| H | 8.176017000 | -0.417606000 | -0.546323000 |
| H | 3.634016000 | 3.260792000  | -0.423928000 |
| H | 4.182939000 | -0.250693000 | 0.954039000  |
| O | 1.522650000 | 4.070454000  | -0.241480000 |

A9

|   |              |              |              |
|---|--------------|--------------|--------------|
| C | 1.149300000  | 2.926391000  | 0.033134000  |
| C | 2.187109000  | 1.842590000  | 0.045033000  |
| H | 1.215960000  | -4.346327000 | 4.028941000  |
| C | 1.245764000  | -3.132118000 | 0.865735000  |
| C | 1.572011000  | -3.937853000 | 1.950327000  |
| C | 0.962985000  | -3.725473000 | 3.179978000  |
| C | 0.023433000  | -2.708806000 | 3.310636000  |
| C | -0.308493000 | -1.912384000 | 2.222228000  |
| C | 0.302932000  | -2.109315000 | 0.980715000  |
| H | 1.732140000  | -3.301214000 | -0.087109000 |
| H | 2.302766000  | -4.727257000 | 1.833605000  |
| H | -0.459667000 | -2.538025000 | 4.263649000  |
| H | -1.060658000 | -1.147715000 | 2.338177000  |
| N | 0.358507000  | 0.198708000  | -0.124244000 |

|   |              |              |              |
|---|--------------|--------------|--------------|
| C | 1.756295000  | 0.408726000  | 0.230144000  |
| C | -0.272878000 | 2.509649000  | 0.233585000  |
| C | -0.514246000 | 1.079292000  | 0.645146000  |
| C | -1.216100000 | 3.450446000  | 0.076141000  |
| C | 0.023079000  | -1.222571000 | -0.231578000 |
| P | -1.643008000 | -1.485719000 | -1.001669000 |
| O | -1.597506000 | -3.018452000 | -1.499584000 |
| O | -2.624368000 | -1.557415000 | 0.261056000  |
| C | -1.593672000 | -3.373079000 | -2.905482000 |
| C | -0.227317000 | -3.866023000 | -3.335960000 |
| C | -4.039361000 | -1.830139000 | 0.091020000  |
| C | -4.416303000 | -3.069009000 | 0.874505000  |
| H | -2.340361000 | -4.159932000 | -3.009576000 |
| H | -1.910420000 | -2.509186000 | -3.487864000 |
| H | -4.567368000 | -0.949287000 | 0.454160000  |
| H | -4.266271000 | -1.943005000 | -0.969601000 |
| H | -5.489022000 | -3.250105000 | 0.785843000  |
| H | -4.175574000 | -2.946114000 | 1.930119000  |
| H | -3.883969000 | -3.941950000 | 0.498851000  |
| H | 0.103116000  | -4.694257000 | -2.709219000 |
| H | -0.271542000 | -4.213999000 | -4.369486000 |
| H | 0.515504000  | -3.069526000 | -3.284040000 |
| H | 1.948708000  | 0.096649000  | 1.271949000  |
| H | -1.551226000 | 0.805595000  | 0.489394000  |
| O | -2.022834000 | -0.528277000 | -2.065352000 |

|   |              |              |              |
|---|--------------|--------------|--------------|
| H | 2.370483000  | -0.234910000 | -0.402309000 |
| H | -0.321543000 | 0.992108000  | 1.729277000  |
| H | 0.665382000  | -1.600145000 | -1.033768000 |
| C | -3.410537000 | 4.297887000  | 0.837665000  |
| C | -4.769790000 | 2.287183000  | -0.498771000 |
| C | -5.481598000 | 3.233838000  | 0.229547000  |
| C | -4.795540000 | 4.242227000  | 0.897983000  |
| H | -2.881344000 | 5.094571000  | 1.345011000  |
| H | -5.296495000 | 1.519287000  | -1.050251000 |
| H | -6.562463000 | 3.197201000  | 0.262220000  |
| H | -5.340092000 | 4.992800000  | 1.455553000  |
| C | -2.679610000 | 3.329462000  | 0.136637000  |
| C | -3.381684000 | 2.327296000  | -0.545522000 |
| H | -2.848921000 | 1.602000000  | -1.146108000 |
| H | -0.835870000 | 4.449779000  | -0.112090000 |
| C | 3.461397000  | 2.237445000  | -0.141386000 |
| C | 4.909630000  | 0.212339000  | 0.370077000  |
| C | 4.707893000  | 1.480765000  | -0.198660000 |
| C | 6.137179000  | -0.427173000 | 0.266161000  |
| C | 5.797889000  | 2.083161000  | -0.850444000 |
| C | 7.018244000  | 1.437933000  | -0.965456000 |
| C | 7.192828000  | 0.175201000  | -0.408489000 |
| H | 6.271450000  | -1.399270000 | 0.721945000  |
| H | 5.669824000  | 3.070057000  | -1.275978000 |
| H | 7.836335000  | 1.921976000  | -1.481971000 |

|   |             |              |              |
|---|-------------|--------------|--------------|
| H | 8.146399000 | -0.329219000 | -0.488754000 |
| H | 3.572218000 | 3.302841000  | -0.311818000 |
| H | 4.120773000 | -0.265551000 | 0.929016000  |
| O | 1.454993000 | 4.095348000  | -0.144985000 |

#### A10

|   |              |              |              |
|---|--------------|--------------|--------------|
| C | 1.120613000  | -2.649999000 | 0.117758000  |
| C | 2.165189000  | -1.588115000 | -0.075107000 |
| H | -0.777780000 | 3.532651000  | -5.043970000 |
| C | -1.497745000 | 1.893813000  | -2.162032000 |
| C | -1.668742000 | 2.419143000  | -3.436914000 |
| C | -0.640648000 | 3.124438000  | -4.051558000 |
| C | 0.560592000  | 3.309793000  | -3.378813000 |
| C | 0.729886000  | 2.784263000  | -2.103549000 |
| C | -0.290448000 | 2.063789000  | -1.479077000 |
| H | -2.314457000 | 1.367590000  | -1.687861000 |
| H | -2.611508000 | 2.280098000  | -3.949261000 |
| H | 1.363894000  | 3.866754000  | -3.842714000 |
| H | 1.664999000  | 2.945109000  | -1.581263000 |
| N | 0.344573000  | 0.046569000  | -0.040415000 |
| C | 1.726203000  | -0.192562000 | -0.442639000 |
| C | -0.292321000 | -2.292471000 | -0.219517000 |
| C | -0.545219000 | -0.894908000 | -0.724548000 |
| C | -1.204428000 | -3.275881000 | -0.114515000 |
| C | -0.039254000 | 1.468812000  | -0.100030000 |

|   |              |              |              |
|---|--------------|--------------|--------------|
| P | -1.395227000 | 1.732864000  | 1.122550000  |
| O | -0.728872000 | 1.471452000  | 2.559101000  |
| O | -1.504346000 | 3.326797000  | 1.090999000  |
| C | -0.872358000 | 0.209277000  | 3.261168000  |
| C | -0.561158000 | 0.443218000  | 4.722390000  |
| C | -2.546294000 | 4.016228000  | 1.823860000  |
| C | -2.556871000 | 5.461850000  | 1.381071000  |
| H | -1.889261000 | -0.154844000 | 3.120394000  |
| H | -0.181071000 | -0.505001000 | 2.815245000  |
| H | -3.499583000 | 3.527863000  | 1.619680000  |
| H | -2.331231000 | 3.929725000  | 2.890348000  |
| H | -3.327652000 | 6.008881000  | 1.926070000  |
| H | -1.595028000 | 5.934905000  | 1.577810000  |
| H | -2.768041000 | 5.537866000  | 0.314928000  |
| H | -1.260108000 | 1.154694000  | 5.162309000  |
| H | -0.639827000 | -0.498101000 | 5.268336000  |
| H | 0.450451000  | 0.828709000  | 4.848479000  |
| H | 2.367739000  | 0.530188000  | 0.063481000  |
| H | -0.378743000 | -0.869284000 | -1.815025000 |
| O | -2.655552000 | 0.979941000  | 0.893580000  |
| H | 1.850889000  | -0.027342000 | -1.527460000 |
| H | -1.569777000 | -0.597014000 | -0.553619000 |
| H | 0.792683000  | 2.016864000  | 0.346056000  |
| C | -3.525272000 | -2.236935000 | -0.111491000 |
| C | -4.546376000 | -4.618154000 | -1.130849000 |

|   |              |              |              |
|---|--------------|--------------|--------------|
| C | -5.399987000 | -3.548259000 | -0.885882000 |
| C | -4.884087000 | -2.366471000 | -0.365447000 |
| H | -3.169020000 | -1.314815000 | 0.323791000  |
| H | -4.937190000 | -5.548564000 | -1.521063000 |
| H | -6.459476000 | -3.639570000 | -1.085134000 |
| H | -5.542688000 | -1.536520000 | -0.146488000 |
| C | -2.647962000 | -3.300532000 | -0.371113000 |
| C | -3.191669000 | -4.498575000 | -0.861025000 |
| H | -2.532940000 | -5.339149000 | -1.038731000 |
| H | -0.784512000 | -4.234914000 | 0.171965000  |
| C | 3.442251000  | -1.961158000 | 0.131593000  |
| C | 4.873801000  | -0.066532000 | -0.762996000 |
| C | 4.688908000  | -1.208667000 | 0.032303000  |
| C | 6.099584000  | 0.583403000  | -0.802989000 |
| C | 5.793354000  | -1.681239000 | 0.761282000  |
| C | 7.012423000  | -1.023420000 | 0.732099000  |
| C | 7.170396000  | 0.116308000  | -0.049661000 |
| H | 6.221145000  | 1.454913000  | -1.432584000 |
| H | 5.678732000  | -2.574515000 | 1.361670000  |
| H | 7.842858000  | -1.403722000 | 1.311835000  |
| H | 8.123023000  | 0.627695000  | -0.081818000 |
| H | 3.556174000  | -2.988540000 | 0.460122000  |
| H | 4.071534000  | 0.295223000  | -1.386865000 |
| O | 1.422269000  | -3.761883000 | 0.525490000  |

A11

|   |              |              |              |
|---|--------------|--------------|--------------|
| C | 0.760901000  | -2.751190000 | 0.126021000  |
| C | 1.900493000  | -1.799779000 | -0.103127000 |
| H | -0.670025000 | 3.634320000  | -4.947310000 |
| C | -1.464226000 | 2.071829000  | -2.042711000 |
| C | -1.622474000 | 2.623480000  | -3.307839000 |
| C | -0.542586000 | 3.204278000  | -3.962915000 |
| C | 0.699350000  | 3.235907000  | -3.341535000 |
| C | 0.856115000  | 2.683018000  | -2.075782000 |
| C | -0.218429000 | 2.088190000  | -1.409783000 |
| H | -2.318930000 | 1.644038000  | -1.537263000 |
| H | -2.595649000 | 2.604319000  | -3.779998000 |
| H | 1.545258000  | 3.692306000  | -3.838393000 |
| H | 1.827035000  | 2.719239000  | -1.596400000 |
| N | 0.252951000  | 0.006566000  | -0.006010000 |
| C | 1.590828000  | -0.365283000 | -0.451299000 |
| C | -0.616607000 | -2.257140000 | -0.180065000 |
| C | -0.747550000 | -0.835652000 | -0.664809000 |
| C | -1.616065000 | -3.151241000 | -0.072429000 |
| C | 0.010649000  | 1.457593000  | -0.041449000 |
| P | -1.289779000 | 1.868044000  | 1.210376000  |
| O | -0.514062000 | 1.631688000  | 2.592857000  |
| O | -1.489485000 | 3.455868000  | 1.128863000  |
| C | -1.039770000 | 0.806628000  | 3.666596000  |
| C | -0.011424000 | -0.232137000 | 4.055515000  |



|   |              |              |              |
|---|--------------|--------------|--------------|
| C | -0.468304000 | 4.426372000  | 1.444555000  |
| C | -1.133273000 | 5.776091000  | 1.604298000  |
| H | -1.259914000 | 1.479543000  | 4.495937000  |
| H | -1.970545000 | 0.350206000  | 3.334605000  |
| H | 0.040796000  | 4.125084000  | 2.360771000  |
| H | 0.258850000  | 4.447785000  | 0.629666000  |
| H | -0.382228000 | 6.534982000  | 1.829063000  |
| H | -1.650054000 | 6.061479000  | 0.688728000  |
| H | -1.857997000 | 5.754402000  | 2.417524000  |
| H | 0.921167000  | 0.239390000  | 4.365953000  |
| H | -0.388427000 | -0.826732000 | 4.889511000  |
| H | 0.197770000  | -0.901148000 | 3.222170000  |
| H | 1.700758000  | -0.205994000 | -1.538879000 |
| H | -0.618241000 | -0.814168000 | -1.760705000 |
| O | -2.580694000 | 1.157858000  | 1.064213000  |
| H | 2.316241000  | 0.285814000  | 0.038897000  |
| H | -1.731031000 | -0.442604000 | -0.452690000 |
| H | 0.912024000  | 1.909396000  | 0.379451000  |
| C | -3.723153000 | -4.152985000 | -0.823868000 |
| C | -5.192372000 | -1.883665000 | -0.231706000 |
| C | -5.828225000 | -2.991817000 | -0.780659000 |
| C | -5.086717000 | -4.130898000 | -1.074212000 |
| H | -3.152200000 | -5.047327000 | -1.039237000 |
| H | -5.763530000 | -1.001440000 | 0.025141000  |
| H | -6.894278000 | -2.973247000 | -0.964402000 |

|   |              |              |              |
|---|--------------|--------------|--------------|
| H | -5.572166000 | -5.005193000 | -1.487329000 |
| C | -3.058778000 | -3.030085000 | -0.305915000 |
| C | -3.823879000 | -1.895460000 | 0.002501000  |
| H | -3.371170000 | -1.028170000 | 0.460420000  |
| H | -1.286564000 | -4.150533000 | 0.193854000  |
| C | 3.139658000  | -2.302465000 | 0.052936000  |
| C | 4.721537000  | -0.553828000 | -0.886056000 |
| C | 4.452253000  | -1.680961000 | -0.093330000 |
| C | 6.004954000  | -0.032262000 | -0.971706000 |
| C | 5.531327000  | -2.273297000 | 0.584405000  |
| C | 6.809483000  | -1.743823000 | 0.509413000  |
| C | 7.052105000  | -0.616330000 | -0.268388000 |
| H | 6.189713000  | 0.829965000  | -1.598787000 |
| H | 5.350244000  | -3.157296000 | 1.182025000  |
| H | 7.619397000  | -2.215037000 | 1.050131000  |
| H | 8.050310000  | -0.205223000 | -0.336502000 |
| H | 3.160073000  | -3.338099000 | 0.374631000  |
| H | 3.935853000  | -0.103550000 | -1.472245000 |
| O | 0.961559000  | -3.885620000 | 0.533836000  |

A12

|   |              |              |              |
|---|--------------|--------------|--------------|
| C | 0.754439000  | -2.813165000 | 0.169632000  |
| C | 1.890547000  | -1.882189000 | -0.132544000 |
| H | -1.415964000 | 3.066639000  | -5.193030000 |
| C | -1.695037000 | 1.925912000  | -2.009572000 |

|   |              |              |              |
|---|--------------|--------------|--------------|
| C | -2.074627000 | 2.342255000  | -3.280109000 |
| C | -1.117307000 | 2.741873000  | -4.205277000 |
| C | 0.225582000  | 2.730241000  | -3.849332000 |
| C | 0.603667000  | 2.316300000  | -2.577975000 |
| C | -0.346866000 | 1.902856000  | -1.642268000 |
| H | -2.450416000 | 1.639906000  | -1.290352000 |
| H | -3.123629000 | 2.359931000  | -3.544910000 |
| H | 0.979057000  | 3.048214000  | -4.557738000 |
| H | 1.652116000  | 2.322645000  | -2.307037000 |
| N | 0.309622000  | -0.038532000 | -0.112355000 |
| C | 1.537497000  | -0.542976000 | -0.723950000 |
| C | -0.631075000 | -2.308143000 | -0.090308000 |
| C | -0.827570000 | -0.870469000 | -0.506762000 |
| C | -1.625983000 | -3.202870000 | 0.077767000  |
| C | 0.122602000  | 1.416408000  | -0.276927000 |
| P | -0.874716000 | 2.027575000  | 1.149585000  |
| O | 0.025009000  | 1.737902000  | 2.448829000  |
| O | -0.690367000 | 3.605753000  | 0.964047000  |
| C | -0.201786000 | 0.576414000  | 3.289326000  |
| C | 0.380703000  | 0.858229000  | 4.656141000  |
| C | -1.429220000 | 4.540915000  | 1.786547000  |
| C | -1.329347000 | 5.909625000  | 1.151385000  |
| H | -1.273128000 | 0.386277000  | 3.339970000  |
| H | 0.282302000  | -0.277490000 | 2.816181000  |
| H | -2.464658000 | 4.206125000  | 1.855346000  |

|   |              |              |              |
|---|--------------|--------------|--------------|
| H | -0.993585000 | 4.535316000  | 2.787240000  |
| H | -1.764432000 | 5.904151000  | 0.152539000  |
| H | -1.867070000 | 6.638992000  | 1.759076000  |
| H | -0.289410000 | 6.226329000  | 1.073889000  |
| H | -0.113480000 | 1.710068000  | 5.123508000  |
| H | 0.245051000  | -0.012706000 | 5.299200000  |
| H | 1.447616000  | 1.071183000  | 4.589593000  |
| H | 1.424074000  | -0.648897000 | -1.817498000 |
| H | -0.981905000 | -0.819518000 | -1.597788000 |
| O | -2.268421000 | 1.529123000  | 1.253509000  |
| H | 2.337380000  | 0.172421000  | -0.565556000 |
| H | -1.725071000 | -0.474913000 | -0.034572000 |
| H | 1.101511000  | 1.861147000  | -0.091297000 |
| C | -3.720061000 | -2.113978000 | -0.863446000 |
| C | -5.247403000 | -4.053184000 | 0.417480000  |
| C | -5.873086000 | -3.062561000 | -0.332231000 |
| C | -5.102616000 | -2.101699000 | -0.976827000 |
| H | -3.149575000 | -1.371144000 | -1.396679000 |
| H | -5.836305000 | -4.812468000 | 0.914506000  |
| H | -6.951045000 | -3.045164000 | -0.421044000 |
| H | -5.580934000 | -1.337799000 | -1.575136000 |
| C | -3.069089000 | -3.096255000 | -0.099340000 |
| C | -3.866361000 | -4.073762000 | 0.521481000  |
| H | -3.382669000 | -4.851806000 | 1.097881000  |
| H | -1.289481000 | -4.172111000 | 0.429522000  |

|   |             |              |              |
|---|-------------|--------------|--------------|
| C | 3.133161000 | -2.335285000 | 0.093058000  |
| C | 5.480492000 | -2.349265000 | -0.681687000 |
| C | 4.424696000 | -1.654061000 | -0.077435000 |
| C | 6.723966000 | -1.756982000 | -0.850055000 |
| C | 4.673868000 | -0.359828000 | 0.396268000  |
| C | 5.922998000 | 0.226561000  | 0.242794000  |
| C | 6.949872000 | -0.464286000 | -0.390593000 |
| H | 7.520382000 | -2.308795000 | -1.331450000 |
| H | 3.896636000 | 0.174971000  | 0.924243000  |
| H | 6.097327000 | 1.222551000  | 0.628015000  |
| H | 7.921557000 | -0.004767000 | -0.511736000 |
| H | 3.188066000 | -3.367601000 | 0.424332000  |
| H | 5.314769000 | -3.361003000 | -1.029046000 |
| O | 0.958576000 | -3.935825000 | 0.606252000  |

### A13

|   |              |              |              |
|---|--------------|--------------|--------------|
| C | 0.927975000  | -2.755983000 | 0.126883000  |
| C | 2.023563000  | -1.742278000 | -0.052608000 |
| H | 0.066293000  | 3.826673000  | -4.855741000 |
| C | -1.114305000 | 1.965426000  | -2.275185000 |
| C | -1.065824000 | 2.580983000  | -3.520385000 |
| C | 0.034127000  | 3.347973000  | -3.886133000 |
| C | 1.088362000  | 3.502261000  | -2.994422000 |
| C | 1.040159000  | 2.884691000  | -1.750756000 |
| C | -0.054857000 | 2.104172000  | -1.373842000 |

|   |              |              |              |
|---|--------------|--------------|--------------|
| H | -1.990929000 | 1.402003000  | -1.991321000 |
| H | -1.896243000 | 2.465087000  | -4.204179000 |
| H | 1.945902000  | 4.104581000  | -3.263883000 |
| H | 1.863541000  | 3.016781000  | -1.059275000 |
| N | 0.281922000  | -0.029322000 | -0.005141000 |
| C | 1.652194000  | -0.323709000 | -0.406510000 |
| C | -0.465198000 | -2.329529000 | -0.210050000 |
| C | -0.646183000 | -0.918240000 | -0.707207000 |
| C | -1.425198000 | -3.266361000 | -0.106378000 |
| C | -0.031759000 | 1.405156000  | -0.017779000 |
| P | -1.554231000 | 1.719132000  | 0.987384000  |
| O | -1.352670000 | 0.981930000  | 2.394365000  |
| O | -1.365314000 | 3.289937000  | 1.271232000  |
| C | -0.168831000 | 1.098776000  | 3.212593000  |
| C | -0.475107000 | 0.510074000  | 4.572169000  |
| C | -2.496725000 | 4.126508000  | 1.624110000  |
| C | -2.132707000 | 5.564881000  | 1.332648000  |
| H | 0.637891000  | 0.550922000  | 2.724035000  |
| H | 0.111541000  | 2.151254000  | 3.293770000  |
| H | -3.362257000 | 3.803617000  | 1.046769000  |
| H | -2.714291000 | 3.979985000  | 2.683768000  |
| H | -2.962905000 | 6.217484000  | 1.607177000  |
| H | -1.254758000 | 5.868914000  | 1.902637000  |
| H | -1.921906000 | 5.702551000  | 0.272656000  |
| H | -0.765341000 | -0.535688000 | 4.479324000  |

|   |              |              |              |
|---|--------------|--------------|--------------|
| H | 0.409444000  | 0.567806000  | 5.208259000  |
| H | -1.286181000 | 1.052481000  | 5.057414000  |
| H | 1.789969000  | -0.149417000 | -1.487879000 |
| H | -0.466268000 | -0.892093000 | -1.795861000 |
| O | -2.853812000 | 1.329034000  | 0.394125000  |
| H | 2.324985000  | 0.364256000  | 0.108723000  |
| H | -1.658957000 | -0.572766000 | -0.552899000 |
| H | 0.758992000  | 1.883176000  | 0.566075000  |
| C | -3.694924000 | -2.113839000 | -0.130761000 |
| C | -4.828521000 | -4.469458000 | -1.086831000 |
| C | -5.629978000 | -3.353726000 | -0.871858000 |
| C | -5.058050000 | -2.184315000 | -0.383100000 |
| H | -3.299015000 | -1.196419000 | 0.277790000  |
| H | -5.263312000 | -5.390399000 | -1.452230000 |
| H | -6.692582000 | -3.399368000 | -1.070220000 |
| H | -5.674300000 | -1.316670000 | -0.189215000 |
| C | -2.868398000 | -3.224239000 | -0.359978000 |
| C | -3.469795000 | -4.407362000 | -0.818866000 |
| H | -2.852007000 | -5.282957000 | -0.973002000 |
| H | -1.051936000 | -4.244598000 | 0.179495000  |
| C | 3.280728000  | -2.177356000 | 0.153848000  |
| C | 4.802058000  | -0.339439000 | -0.711707000 |
| C | 4.561775000  | -1.482891000 | 0.066896000  |
| C | 6.056912000  | 0.253309000  | -0.739556000 |
| C | 5.641193000  | -2.016704000 | 0.791183000  |

|   |             |              |              |
|---|-------------|--------------|--------------|
| C | 6.889737000 | -1.416242000 | 0.773768000  |
| C | 7.102880000 | -0.273944000 | 0.008967000  |
| H | 6.220502000 | 1.126715000  | -1.356901000 |
| H | 5.483772000 | -2.912102000 | 1.378497000  |
| H | 7.700108000 | -1.843494000 | 1.349216000  |
| H | 8.078567000 | 0.192492000  | -0.014301000 |
| H | 3.344639000 | -3.212448000 | 0.471607000  |
| H | 4.019370000 | 0.068370000  | -1.332026000 |
| O | 1.177529000 | -3.884653000 | 0.523032000  |

#### A14

|   |              |              |              |
|---|--------------|--------------|--------------|
| C | 0.731929000  | -2.781793000 | 0.235902000  |
| C | 1.876800000  | -1.849267000 | -0.023719000 |
| H | 0.098095000  | 3.678903000  | -4.900120000 |
| C | -1.114017000 | 2.030188000  | -2.192490000 |
| C | -1.077137000 | 2.602943000  | -3.458572000 |
| C | 0.074542000  | 3.233304000  | -3.914597000 |
| C | 1.192135000  | 3.296434000  | -3.091376000 |
| C | 1.154929000  | 2.722580000  | -1.826629000 |
| C | 0.008185000  | 2.075857000  | -1.360110000 |
| H | -2.027173000 | 1.579115000  | -1.833225000 |
| H | -1.956751000 | 2.562612000  | -4.087371000 |
| H | 2.090849000  | 3.794394000  | -3.430661000 |
| H | 2.028627000  | 2.784008000  | -1.189283000 |
| N | 0.246824000  | -0.043621000 | 0.046323000  |



|   |              |              |              |
|---|--------------|--------------|--------------|
| C | 1.557474000  | -0.442745000 | -0.455999000 |
| C | -0.632656000 | -2.309459000 | -0.151807000 |
| C | -0.806218000 | -0.865038000 | -0.548489000 |
| C | -1.616230000 | -3.229770000 | -0.109412000 |
| C | 0.041719000  | 1.412621000  | 0.014364000  |
| P | -1.397661000 | 1.890682000  | 1.077758000  |
| O | -1.227552000 | 1.118638000  | 2.469752000  |
| O | -1.005176000 | 3.425260000  | 1.365233000  |
| C | -0.017485000 | 1.122956000  | 3.257725000  |
| C | -0.341533000 | 0.554852000  | 4.622012000  |
| C | -2.021635000 | 4.395583000  | 1.724393000  |
| C | -1.512301000 | 5.774115000  | 1.368127000  |
| H | 0.724627000  | 0.508976000  | 2.745982000  |
| H | 0.357075000  | 2.145741000  | 3.336028000  |
| H | -2.939040000 | 4.152617000  | 1.189643000  |
| H | -2.213185000 | 4.309037000  | 2.795608000  |
| H | -2.253103000 | 6.524248000  | 1.649381000  |
| H | -0.583566000 | 5.996004000  | 1.893955000  |
| H | -1.330901000 | 5.853697000  | 0.296784000  |
| H | -0.726321000 | -0.460242000 | 4.532137000  |
| H | 0.560017000  | 0.529222000  | 5.236028000  |
| H | -1.088932000 | 1.164276000  | 5.129457000  |
| H | 1.609058000  | -0.349799000 | -1.554707000 |
| H | -0.806428000 | -0.769640000 | -1.648115000 |
| O | -2.753347000 | 1.674048000  | 0.528048000  |

|   |              |              |              |
|---|--------------|--------------|--------------|
| H | 2.307284000  | 0.238037000  | -0.051483000 |
| H | -1.772309000 | -0.505567000 | -0.199179000 |
| H | 0.897311000  | 1.837778000  | 0.544961000  |
| C | -3.626931000 | -2.161199000 | -1.237153000 |
| C | -5.233031000 | -4.161844000 | -0.165208000 |
| C | -5.801355000 | -3.163928000 | -0.950018000 |
| C | -4.990988000 | -2.171401000 | -1.489031000 |
| H | -3.022692000 | -1.392532000 | -1.691041000 |
| H | -5.852328000 | -4.945019000 | 0.251339000  |
| H | -6.865050000 | -3.164509000 | -1.146823000 |
| H | -5.422841000 | -1.398937000 | -2.111046000 |
| C | -3.035282000 | -3.149758000 | -0.434384000 |
| C | -3.869533000 | -4.158250000 | 0.078575000  |
| H | -3.430059000 | -4.940676000 | 0.683759000  |
| H | -1.295062000 | -4.198545000 | 0.257586000  |
| C | 3.114387000  | -2.338857000 | 0.175487000  |
| C | 4.694658000  | -0.651772000 | -0.868747000 |
| C | 4.424560000  | -1.717816000 | 0.004065000  |
| C | 5.973313000  | -0.121400000 | -0.971373000 |
| C | 5.497479000  | -2.244050000 | 0.742921000  |
| C | 6.770691000  | -1.705427000 | 0.649479000  |
| C | 7.014001000  | -0.636849000 | -0.207329000 |
| H | 6.159578000  | 0.692710000  | -1.659297000 |
| H | 5.315419000  | -3.082713000 | 1.402504000  |
| H | 7.576353000  | -2.123988000 | 1.237783000  |

|   |             |              |              |
|---|-------------|--------------|--------------|
| H | 8.008525000 | -0.219422000 | -0.289523000 |
| H | 3.135420000 | -3.353404000 | 0.558642000  |
| H | 3.914190000 | -0.258534000 | -1.501695000 |
| O | 0.918280000 | -3.893897000 | 0.707183000  |

#### A15

|   |              |              |              |
|---|--------------|--------------|--------------|
| C | 1.100437000  | -2.629371000 | 0.056743000  |
| C | 2.137632000  | -1.559411000 | -0.132932000 |
| H | -0.969079000 | 3.635063000  | -4.924659000 |
| C | -1.600877000 | 1.956868000  | -2.044774000 |
| C | -1.812025000 | 2.502684000  | -3.304909000 |
| C | -0.800821000 | 3.210861000  | -3.943818000 |
| C | 0.423938000  | 3.378378000  | -3.309946000 |
| C | 0.633284000  | 2.832457000  | -2.049271000 |
| C | -0.369836000 | 2.108721000  | -1.401137000 |
| H | -2.403932000 | 1.427585000  | -1.550871000 |
| H | -2.772647000 | 2.377198000  | -3.786686000 |
| H | 1.214598000  | 3.937442000  | -3.792666000 |
| H | 1.586790000  | 2.979946000  | -1.557274000 |
| N | 0.313543000  | 0.068058000  | -0.021306000 |
| C | 1.686669000  | -0.157386000 | -0.459208000 |
| C | -0.320578000 | -2.268171000 | -0.240663000 |
| C | -0.586798000 | -0.860647000 | -0.709775000 |
| C | -1.228064000 | -3.255975000 | -0.136712000 |
| C | -0.075182000 | 1.489907000  | -0.041509000 |

|   |              |              |              |
|---|--------------|--------------|--------------|
| P | -1.394998000 | 1.722119000  | 1.226683000  |
| O | -0.672408000 | 1.454318000  | 2.633042000  |
| O | -1.532091000 | 3.314498000  | 1.210720000  |
| C | -0.847517000 | 0.225448000  | 3.385702000  |
| C | 0.497446000  | -0.236457000 | 3.899643000  |
| C | -2.551563000 | 3.981187000  | 1.994037000  |
| C | -2.596095000 | 5.432659000  | 1.572903000  |
| H | -1.529324000 | 0.450222000  | 4.206727000  |
| H | -1.315689000 | -0.525155000 | 2.752143000  |
| H | -3.506867000 | 3.484847000  | 1.820457000  |
| H | -2.293652000 | 3.882587000  | 3.050069000  |
| H | -3.350853000 | 5.962932000  | 2.155560000  |
| H | -1.632597000 | 5.914314000  | 1.738133000  |
| H | -2.850099000 | 5.520739000  | 0.517084000  |
| H | 0.965315000  | 0.534400000  | 4.512196000  |
| H | 0.368937000  | -1.130702000 | 4.511700000  |
| H | 1.162843000  | -0.480395000 | 3.072799000  |
| H | 1.787023000  | 0.032154000  | -1.542662000 |
| H | -0.439935000 | -0.809994000 | -1.802204000 |
| O | -2.647630000 | 0.947591000  | 1.031080000  |
| H | 2.337488000  | 0.555955000  | 0.048314000  |
| H | -1.609186000 | -0.570414000 | -0.514625000 |
| H | 0.768301000  | 2.031911000  | 0.389761000  |
| C | -3.228897000 | -4.465830000 | -0.867794000 |
| C | -4.914274000 | -2.350876000 | -0.282562000 |

|   |              |              |              |
|---|--------------|--------------|--------------|
| C | -5.439192000 | -3.521022000 | -0.819969000 |
| C | -4.589091000 | -4.582437000 | -1.109935000 |
| H | -2.572461000 | -5.300108000 | -1.080378000 |
| H | -5.569714000 | -1.528561000 | -0.028187000 |
| H | -6.502736000 | -3.610382000 | -0.997314000 |
| H | -4.986673000 | -5.504181000 | -1.513632000 |
| C | -2.676978000 | -3.278458000 | -0.361427000 |
| C | -3.550350000 | -2.223807000 | -0.056136000 |
| H | -3.186480000 | -1.311892000 | 0.394289000  |
| H | -0.799840000 | -4.219986000 | 0.119149000  |
| C | 3.419924000  | -1.932237000 | 0.039153000  |
| C | 4.827164000  | -0.011859000 | -0.839579000 |
| C | 4.661905000  | -1.173001000 | -0.067757000 |
| C | 6.050008000  | 0.642963000  | -0.889063000 |
| C | 5.782313000  | -1.658666000 | 0.627505000  |
| C | 6.998581000  | -0.996171000 | 0.589139000  |
| C | 7.137300000  | 0.161985000  | -0.168788000 |
| H | 6.156212000  | 1.529370000  | -1.500368000 |
| H | 5.682511000  | -2.566042000 | 1.209099000  |
| H | 7.841693000  | -1.387035000 | 1.142973000  |
| H | 8.087571000  | 0.677221000  | -0.208246000 |
| H | 3.544074000  | -2.966669000 | 0.340818000  |
| H | 4.011473000  | 0.361853000  | -1.438544000 |
| O | 1.414169000  | -3.749711000 | 0.430529000  |

A16

|   |              |              |              |
|---|--------------|--------------|--------------|
| C | 0.992472000  | -2.651480000 | 0.129482000  |
| C | 2.061226000  | -1.631950000 | -0.125069000 |
| H | -1.020073000 | 3.650236000  | -4.846332000 |
| C | -1.606331000 | 2.022499000  | -1.927595000 |
| C | -1.845897000 | 2.571587000  | -3.181450000 |
| C | -0.829596000 | 3.222704000  | -3.871002000 |
| C | 0.429524000  | 3.329804000  | -3.293942000 |
| C | 0.667478000  | 2.780826000  | -2.039583000 |
| C | -0.340938000 | 2.113763000  | -1.341141000 |
| H | -2.412374000 | 1.542556000  | -1.389753000 |
| H | -2.833196000 | 2.495954000  | -3.617775000 |
| H | 1.225158000  | 3.844980000  | -3.815777000 |
| H | 1.648714000  | 2.881890000  | -1.592530000 |
| N | 0.302883000  | 0.048184000  | 0.012236000  |
| C | 1.633964000  | -0.240382000 | -0.512653000 |
| C | -0.409641000 | -2.270366000 | -0.224982000 |
| C | -0.689547000 | -0.836657000 | -0.598785000 |
| C | -1.328093000 | -3.254788000 | -0.171328000 |
| C | -0.018573000 | 1.487271000  | 0.009576000  |
| P | -1.275391000 | 1.814961000  | 1.322140000  |
| O | -0.529402000 | 1.497385000  | 2.706664000  |
| O | -1.284910000 | 3.415053000  | 1.294914000  |
| C | -0.832179000 | 0.329082000  | 3.512927000  |
| C | 0.449491000  | -0.403683000 | 3.841504000  |

|   |              |              |              |
|---|--------------|--------------|--------------|
| C | -2.229620000 | 4.161766000  | 2.098466000  |
| C | -2.229567000 | 5.595751000  | 1.618523000  |
| H | -1.321491000 | 0.694578000  | 4.416536000  |
| H | -1.538523000 | -0.302509000 | 2.977206000  |
| H | -3.214962000 | 3.705922000  | 1.995927000  |
| H | -1.920737000 | 4.094110000  | 3.143326000  |
| H | -2.924803000 | 6.185765000  | 2.217647000  |
| H | -1.236731000 | 6.035631000  | 1.710835000  |
| H | -2.537576000 | 5.653636000  | 0.575057000  |
| H | 1.146108000  | 0.248928000  | 4.368156000  |
| H | 0.230163000  | -1.259557000 | 4.482178000  |
| H | 0.928098000  | -0.767131000 | 2.933704000  |
| H | 1.663652000  | -0.115218000 | -1.609570000 |
| H | -0.694307000 | -0.720801000 | -1.696026000 |
| O | -2.588597000 | 1.141156000  | 1.168818000  |
| H | 2.336968000  | 0.480496000  | -0.094662000 |
| H | -1.675589000 | -0.553478000 | -0.237687000 |
| H | 0.870351000  | 1.986189000  | 0.399297000  |
| C | -3.405351000 | -2.331083000 | -1.300003000 |
| C | -4.894410000 | -4.371437000 | -0.137643000 |
| C | -5.522389000 | -3.430961000 | -0.947563000 |
| C | -4.770116000 | -2.419045000 | -1.532827000 |
| H | -2.842778000 | -1.552994000 | -1.790777000 |
| H | -5.468122000 | -5.170001000 | 0.313521000  |
| H | -6.586970000 | -3.492336000 | -1.129451000 |

|   |              |              |              |
|---|--------------|--------------|--------------|
| H | -5.248397000 | -1.694476000 | -2.178253000 |
| C | -2.755184000 | -3.260162000 | -0.472319000 |
| C | -3.529481000 | -4.291911000 | 0.085354000  |
| H | -3.042664000 | -5.031121000 | 0.708423000  |
| H | -0.938600000 | -4.203264000 | 0.182594000  |
| C | 3.334444000  | -2.034173000 | 0.043360000  |
| C | 4.769189000  | -0.220552000 | -0.995341000 |
| C | 4.591805000  | -1.313633000 | -0.132757000 |
| C | 6.002228000  | 0.407084000  | -1.106051000 |
| C | 5.710164000  | -1.765094000 | 0.587676000  |
| C | 6.937203000  | -1.129258000 | 0.487132000  |
| C | 7.087953000  | -0.035676000 | -0.359359000 |
| H | 6.117804000  | 1.240862000  | -1.785868000 |
| H | 5.600362000  | -2.622724000 | 1.238855000  |
| H | 7.779249000  | -1.491064000 | 1.061937000  |
| H | 8.046492000  | 0.457876000  | -0.446923000 |
| H | 3.436602000  | -3.052835000 | 0.401761000  |
| H | 3.953122000  | 0.117626000  | -1.615076000 |
| O | 1.265952000  | -3.757158000 | 0.572865000  |

A17

|   |              |              |              |
|---|--------------|--------------|--------------|
| C | -1.325720000 | -2.564380000 | -0.313664000 |
| C | -2.359572000 | -1.511191000 | -0.063397000 |
| H | 1.623942000  | 3.098437000  | 4.972986000  |
| C | -0.463570000 | 2.555302000  | 2.359521000  |



|   |              |              |              |
|---|--------------|--------------|--------------|
| C | -0.038983000 | 2.956428000  | 3.620920000  |
| C | 1.287700000  | 2.784607000  | 3.993878000  |
| C | 2.182876000  | 2.216382000  | 3.094503000  |
| C | 1.755337000  | 1.815794000  | 1.835134000  |
| C | 0.421857000  | 1.972970000  | 1.450071000  |
| H | -1.497159000 | 2.707268000  | 2.074337000  |
| H | -0.743211000 | 3.408015000  | 4.307050000  |
| H | 3.221587000  | 2.091656000  | 3.370963000  |
| H | 2.470289000  | 1.395112000  | 1.141790000  |
| N | -0.516876000 | 0.085511000  | 0.014766000  |
| C | -1.897828000 | -0.157934000 | 0.414939000  |
| C | 0.070196000  | -2.271026000 | 0.143215000  |
| C | 0.376210000  | -0.882551000 | 0.642285000  |
| C | 0.956059000  | -3.281081000 | 0.059944000  |
| C | -0.109993000 | 1.501588000  | 0.104724000  |
| P | 0.880889000  | 1.892016000  | -1.409038000 |
| O | 1.522269000  | 3.303135000  | -0.998100000 |
| O | 2.142503000  | 0.887464000  | -1.423210000 |
| C | 2.156760000  | 4.140955000  | -1.992609000 |
| C | 2.282953000  | 5.537859000  | -1.426524000 |
| C | 2.325022000  | -0.097356000 | -2.477323000 |
| C | 3.560269000  | 0.231964000  | -3.287965000 |
| H | 3.137938000  | 3.719490000  | -2.221144000 |
| H | 1.552312000  | 4.128882000  | -2.899900000 |
| H | 2.427741000  | -1.059478000 | -1.977228000 |

|   |              |              |              |
|---|--------------|--------------|--------------|
| H | 1.432764000  | -0.112635000 | -3.099788000 |
| H | 3.730994000  | -0.550092000 | -4.030086000 |
| H | 3.440101000  | 1.178474000  | -3.815178000 |
| H | 4.441616000  | 0.295326000  | -2.649504000 |
| H | 2.870913000  | 5.533694000  | -0.509012000 |
| H | 2.777488000  | 6.186861000  | -2.150928000 |
| H | 1.300758000  | 5.954632000  | -1.205282000 |
| H | -2.012956000 | -0.075868000 | 1.511347000  |
| H | 0.292635000  | -0.841986000 | 1.742268000  |
| O | 0.099832000  | 1.888618000  | -2.665656000 |
| H | -2.528821000 | 0.610457000  | -0.031094000 |
| H | 1.403403000  | -0.627779000 | 0.396673000  |
| H | -1.012315000 | 2.078952000  | -0.103465000 |
| C | 2.976221000  | -2.541083000 | 1.404721000  |
| C | 4.513074000  | -4.437720000 | 0.073677000  |
| C | 5.102842000  | -3.615558000 | 1.028315000  |
| C | 4.326394000  | -2.676174000 | 1.697239000  |
| H | 2.389200000  | -1.829385000 | 1.964029000  |
| H | 5.104769000  | -5.181922000 | -0.442492000 |
| H | 6.154949000  | -3.715764000 | 1.258848000  |
| H | 4.772216000  | -2.049965000 | 2.458595000  |
| C | 2.366303000  | -3.348933000 | 0.431841000  |
| C | 3.162504000  | -4.312939000 | -0.209752000 |
| H | 2.704936000  | -4.962381000 | -0.944910000 |
| H | 0.559664000  | -4.184945000 | -0.390142000 |

|   |              |              |              |
|---|--------------|--------------|--------------|
| C | -3.637492000 | -1.849856000 | -0.317141000 |
| C | -5.052921000 | -0.015120000 | 0.712899000  |
| C | -4.875101000 | -1.090962000 | -0.171157000 |
| C | -6.269101000 | 0.648676000  | 0.791951000  |
| C | -5.976498000 | -1.485516000 | -0.949047000 |
| C | -7.186017000 | -0.813285000 | -0.879914000 |
| C | -7.336919000 | 0.261101000  | -0.009300000 |
| H | -6.385743000 | 1.468677000  | 1.488142000  |
| H | -5.866384000 | -2.327310000 | -1.620423000 |
| H | -8.014235000 | -1.131134000 | -1.499018000 |
| H | -8.281963000 | 0.783635000  | 0.053096000  |
| H | -3.759597000 | -2.844950000 | -0.730922000 |
| H | -4.252090000 | 0.282218000  | 1.371865000  |
| O | -1.615618000 | -3.633067000 | -0.829430000 |

#### A18

|   |              |              |              |
|---|--------------|--------------|--------------|
| C | 0.728050000  | -2.168613000 | -0.232451000 |
| C | 1.915794000  | -1.318360000 | -0.585946000 |
| H | -1.853783000 | 6.175839000  | -2.171663000 |
| C | -0.363824000 | 4.113084000  | 0.073774000  |
| C | -0.906942000 | 5.271542000  | -0.465736000 |
| C | -1.430984000 | 5.271887000  | -1.753706000 |
| C | -1.399571000 | 4.101848000  | -2.499668000 |
| C | -0.852047000 | 2.941184000  | -1.962524000 |
| C | -0.334256000 | 2.928524000  | -0.669111000 |

|   |              |              |              |
|---|--------------|--------------|--------------|
| H | 0.028307000  | 4.122858000  | 1.080986000  |
| H | -0.917927000 | 6.178441000  | 0.124533000  |
| H | -1.795551000 | 4.088939000  | -3.506834000 |
| H | -0.807595000 | 2.043725000  | -2.560671000 |
| N | 0.361382000  | 0.550174000  | -1.023360000 |
| C | 1.627702000  | -0.056908000 | -1.370709000 |
| C | -0.623205000 | -1.712707000 | -0.700808000 |
| C | -0.768687000 | -0.317979000 | -1.283462000 |
| C | -1.624077000 | -2.604187000 | -0.559652000 |
| C | 0.309945000  | 1.656999000  | -0.094418000 |
| P | -0.331814000 | 1.293241000  | 1.626477000  |
| O | -1.888530000 | 1.029698000  | 1.357816000  |
| O | 0.215279000  | -0.170814000 | 2.004553000  |
| C | -2.804197000 | 0.826343000  | 2.464095000  |
| C | -4.217047000 | 0.946239000  | 1.939114000  |
| C | 1.262251000  | -0.387594000 | 2.987063000  |
| C | 0.912198000  | -1.604865000 | 3.814849000  |
| H | -2.619543000 | -0.164415000 | 2.882389000  |
| H | -2.596513000 | 1.575227000  | 3.228708000  |
| H | 2.191525000  | -0.546307000 | 2.438784000  |
| H | 1.357135000  | 0.508284000  | 3.598498000  |
| H | 0.793030000  | -2.482065000 | 3.180427000  |
| H | 1.712897000  | -1.801102000 | 4.530323000  |
| H | -0.010610000 | -1.443609000 | 4.372613000  |
| H | -4.412073000 | 0.198767000  | 1.170699000  |

|   |              |              |              |
|---|--------------|--------------|--------------|
| H | -4.925389000 | 0.793157000  | 2.754842000  |
| H | -4.388271000 | 1.935299000  | 1.515256000  |
| H | 1.593850000  | -0.321798000 | -2.438099000 |
| H | -0.898011000 | -0.401406000 | -2.373704000 |
| O | -0.004570000 | 2.324566000  | 2.641199000  |
| H | 2.422906000  | 0.674599000  | -1.275965000 |
| H | -1.672420000 | 0.146166000  | -0.896423000 |
| H | 1.347710000  | 1.913632000  | 0.137725000  |
| C | -3.638495000 | -1.598515000 | -1.750953000 |
| C | -5.235343000 | -3.560368000 | -0.597009000 |
| C | -5.807314000 | -2.607643000 | -1.433583000 |
| C | -5.000889000 | -1.634280000 | -2.012333000 |
| H | -3.040945000 | -0.844249000 | -2.235518000 |
| H | -5.850019000 | -4.329389000 | -0.148500000 |
| H | -6.868882000 | -2.629193000 | -1.640131000 |
| H | -5.434248000 | -0.898729000 | -2.676962000 |
| C | -3.041192000 | -2.543785000 | -0.899505000 |
| C | -3.873767000 | -3.531619000 | -0.343441000 |
| H | -3.432679000 | -4.281117000 | 0.300898000  |
| H | -1.323741000 | -3.530647000 | -0.082509000 |
| C | 3.127387000  | -1.799055000 | -0.263164000 |
| C | 5.491183000  | -2.105753000 | -0.884265000 |
| C | 4.465222000  | -1.234941000 | -0.490431000 |
| C | 6.779550000  | -1.643230000 | -1.108278000 |
| C | 4.793194000  | 0.110878000  | -0.281298000 |

|   |             |              |              |
|---|-------------|--------------|--------------|
| C | 6.086250000 | 0.571171000  | -0.488581000 |
| C | 7.082573000 | -0.300233000 | -0.913892000 |
| H | 7.550231000 | -2.333343000 | -1.424878000 |
| H | 4.043201000 | 0.797421000  | 0.084328000  |
| H | 6.317878000 | 1.612534000  | -0.308437000 |
| H | 8.088644000 | 0.061438000  | -1.077874000 |
| H | 3.117024000 | -2.782366000 | 0.196956000  |
| H | 5.264877000 | -3.155051000 | -1.023967000 |
| O | 0.866537000 | -3.206669000 | 0.397270000  |

#### A19

|   |              |              |              |
|---|--------------|--------------|--------------|
| C | 1.007931000  | -2.490416000 | -0.293889000 |
| C | 2.135991000  | -1.507570000 | -0.336771000 |
| H | -0.469740000 | 4.794459000  | -4.006869000 |
| C | -1.239903000 | 2.599418000  | -1.538251000 |
| C | -1.400109000 | 3.401553000  | -2.661203000 |
| C | -0.341450000 | 4.167391000  | -3.134834000 |
| C | 0.878768000  | 4.130309000  | -2.472422000 |
| C | 1.035794000  | 3.326607000  | -1.349940000 |
| C | -0.015569000 | 2.544747000  | -0.867886000 |
| H | -2.079714000 | 2.029102000  | -1.169355000 |
| H | -2.358473000 | 3.435059000  | -3.162499000 |
| H | 1.706750000  | 4.731922000  | -2.823229000 |
| H | 1.986293000  | 3.318432000  | -0.831265000 |
| N | 0.462017000  | 0.218172000  | 0.076670000  |

|   |              |              |              |
|---|--------------|--------------|--------------|
| C | 1.797029000  | -0.044207000 | -0.455888000 |
| C | -0.360574000 | -1.968013000 | -0.604467000 |
| C | -0.542801000 | -0.475953000 | -0.725803000 |
| C | -1.337016000 | -2.885353000 | -0.736301000 |
| C | 0.223948000  | 1.647702000  | 0.341690000  |
| P | -0.936642000 | 1.968318000  | 1.748314000  |
| O | -2.332768000 | 1.280238000  | 1.309766000  |
| O | -0.392870000 | 1.103584000  | 2.982687000  |
| C | -3.560050000 | 1.668029000  | 1.985611000  |
| C | -4.732091000 | 1.327261000  | 1.093194000  |
| C | -0.528106000 | -0.323879000 | 3.172911000  |
| C | -0.445015000 | -0.612477000 | 4.656163000  |
| H | -3.615557000 | 1.125094000  | 2.931201000  |
| H | -3.512888000 | 2.734617000  | 2.201658000  |
| H | 0.270627000  | -0.817941000 | 2.623255000  |
| H | -1.480633000 | -0.653930000 | 2.757293000  |
| H | 0.503883000  | -0.264936000 | 5.063776000  |
| H | -1.251946000 | -0.119066000 | 5.197777000  |
| H | -0.519401000 | -1.687767000 | 4.826282000  |
| H | -4.749479000 | 0.264745000  | 0.852168000  |
| H | -5.663774000 | 1.579880000  | 1.601892000  |
| H | -4.688824000 | 1.893630000  | 0.163037000  |
| H | 1.877604000  | 0.291061000  | -1.504903000 |
| H | -1.531893000 | -0.203131000 | -0.367836000 |
| O | -1.020874000 | 3.398985000  | 2.096079000  |

|   |              |              |              |
|---|--------------|--------------|--------------|
| H | 2.520553000  | 0.536779000  | 0.116146000  |
| H | -0.483977000 | -0.165840000 | -1.782979000 |
| H | 1.144513000  | 2.004722000  | 0.810550000  |
| C | -3.290020000 | -1.667728000 | -1.798570000 |
| C | -4.987533000 | -3.682351000 | -0.910286000 |
| C | -5.504590000 | -2.608079000 | -1.627129000 |
| C | -4.648540000 | -1.609155000 | -2.077090000 |
| H | -2.642258000 | -0.898128000 | -2.188872000 |
| H | -5.642452000 | -4.472262000 | -0.567574000 |
| H | -6.562740000 | -2.557447000 | -1.845811000 |
| H | -5.039257000 | -0.783297000 | -2.656600000 |
| C | -2.751560000 | -2.735344000 | -1.063712000 |
| C | -3.629119000 | -3.749624000 | -0.645329000 |
| H | -3.229054000 | -4.594057000 | -0.098990000 |
| H | -1.020506000 | -3.904060000 | -0.539322000 |
| C | 3.380662000  | -2.010642000 | -0.233262000 |
| C | 4.941540000  | -0.112210000 | -0.860240000 |
| C | 4.681705000  | -1.349935000 | -0.250501000 |
| C | 6.212512000  | 0.444286000  | -0.828093000 |
| C | 5.756626000  | -2.013772000 | 0.364266000  |
| C | 7.021774000  | -1.450798000 | 0.408042000  |
| C | 7.254746000  | -0.214851000 | -0.186302000 |
| H | 6.391521000  | 1.394401000  | -1.313664000 |
| H | 5.582316000  | -2.980430000 | 0.818946000  |
| H | 7.828866000  | -1.978440000 | 0.898385000  |



|   |             |              |              |
|---|-------------|--------------|--------------|
| H | 8.242796000 | 0.224574000  | -0.161043000 |
| H | 3.416076000 | -3.083451000 | -0.077141000 |
| H | 4.160054000 | 0.402528000  | -1.397342000 |
| O | 1.201057000 | -3.672618000 | -0.052373000 |

## A20

|   |              |              |              |
|---|--------------|--------------|--------------|
| C | 1.002528000  | -2.204478000 | 0.001991000  |
| C | 2.046401000  | -1.276166000 | -0.546324000 |
| H | -3.678981000 | 4.544745000  | -3.029643000 |
| C | -0.732482000 | 3.340908000  | -1.867960000 |
| C | -1.616598000 | 4.141402000  | -2.577630000 |
| C | -2.986803000 | 3.922481000  | -2.478137000 |
| C | -3.458733000 | 2.903713000  | -1.661395000 |
| C | -2.571583000 | 2.103889000  | -0.946436000 |
| C | -1.194251000 | 2.310705000  | -1.045289000 |
| H | 0.332711000  | 3.517376000  | -1.953053000 |
| H | -1.237437000 | 4.937247000  | -3.205142000 |
| H | -4.522894000 | 2.729003000  | -1.572563000 |
| H | -2.953827000 | 1.330419000  | -0.294926000 |
| N | 0.196157000  | 0.268097000  | -1.132215000 |
| C | 1.580919000  | -0.081430000 | -1.352316000 |
| C | -0.404759000 | -2.031899000 | -0.477167000 |
| C | -0.715057000 | -0.834914000 | -1.353337000 |
| C | -1.301275000 | -2.944602000 | -0.057353000 |
| C | -0.168540000 | 1.427683000  | -0.337427000 |

|   |              |              |              |
|---|--------------|--------------|--------------|
| P | -0.652148000 | 1.111100000  | 1.432494000  |
| O | 0.682602000  | 0.410872000  | 1.975349000  |
| O | -0.598421000 | 2.579629000  | 2.099308000  |
| C | 0.726199000  | -0.110850000 | 3.329792000  |
| C | 2.038912000  | -0.834413000 | 3.525742000  |
| C | -1.743540000 | 3.196142000  | 2.736692000  |
| C | -1.869561000 | 4.628594000  | 2.264317000  |
| H | 0.630182000  | 0.728815000  | 4.021622000  |
| H | -0.123511000 | -0.778633000 | 3.470416000  |
| H | -2.634284000 | 2.611808000  | 2.510879000  |
| H | -1.572351000 | 3.152913000  | 3.813527000  |
| H | -2.700240000 | 5.113929000  | 2.780022000  |
| H | -0.959691000 | 5.189487000  | 2.478443000  |
| H | -2.058773000 | 4.670609000  | 1.192261000  |
| H | 2.880210000  | -0.163806000 | 3.350595000  |
| H | 2.100195000  | -1.201495000 | 4.551795000  |
| H | 2.115245000  | -1.684120000 | 2.849376000  |
| H | 1.715221000  | -0.290711000 | -2.424861000 |
| H | -0.657712000 | -1.118104000 | -2.414486000 |
| O | -1.918763000 | 0.381372000  | 1.685896000  |
| H | 2.208306000  | 0.780644000  | -1.127261000 |
| H | -1.735836000 | -0.505454000 | -1.177080000 |
| H | 0.740626000  | 2.020528000  | -0.231626000 |
| C | -3.337974000 | -2.618812000 | -1.528131000 |
| C | -4.882604000 | -3.930512000 | 0.373627000  |

|   |              |              |              |
|---|--------------|--------------|--------------|
| C | -5.477412000 | -3.448422000 | -0.787844000 |
| C | -4.697371000 | -2.801651000 | -1.739481000 |
| H | -2.749533000 | -2.143235000 | -2.297475000 |
| H | -5.478658000 | -4.444423000 | 1.115939000  |
| H | -6.537300000 | -3.586124000 | -0.954974000 |
| H | -5.148073000 | -2.443131000 | -2.655476000 |
| C | -2.722306000 | -3.083927000 | -0.355650000 |
| C | -3.523040000 | -3.761188000 | 0.578466000  |
| H | -3.062927000 | -4.143901000 | 1.480115000  |
| H | -0.907601000 | -3.676616000 | 0.639584000  |
| C | 3.327341000  | -1.576650000 | -0.261917000 |
| C | 4.737537000  | -0.045312000 | -1.720586000 |
| C | 4.574987000  | -0.913470000 | -0.628591000 |
| C | 5.967166000  | 0.539240000  | -1.990396000 |
| C | 5.707025000  | -1.185286000 | 0.159036000  |
| C | 6.931102000  | -0.592109000 | -0.103761000 |
| C | 7.066443000  | 0.277752000  | -1.180638000 |
| H | 6.068718000  | 1.197143000  | -2.843389000 |
| H | 5.609843000  | -1.868782000 | 0.992611000  |
| H | 7.782382000  | -0.813304000 | 0.526206000  |
| H | 8.021973000  | 0.737670000  | -1.393929000 |
| H | 3.450582000  | -2.442724000 | 0.379257000  |
| H | 3.912549000  | 0.149957000  | -2.387054000 |
| O | 1.302580000  | -3.090548000 | 0.791572000  |

A21

|   |              |              |              |
|---|--------------|--------------|--------------|
| C | 0.258646000  | -2.559553000 | 0.316557000  |
| C | 1.433538000  | -1.853061000 | -0.283829000 |
| H | -4.643198000 | 3.412307000  | -2.868902000 |
| C | -2.432573000 | 2.483230000  | -0.469810000 |
| C | -3.609858000 | 2.946277000  | -1.043763000 |
| C | -3.727561000 | 3.045080000  | -2.425012000 |
| C | -2.655915000 | 2.681643000  | -3.230985000 |
| C | -1.478685000 | 2.221189000  | -2.654428000 |
| C | -1.350047000 | 2.109532000  | -1.268750000 |
| H | -2.354021000 | 2.428294000  | 0.606792000  |
| H | -4.433967000 | 3.238672000  | -0.406993000 |
| H | -2.730848000 | 2.764390000  | -4.307106000 |
| H | -0.644252000 | 1.952674000  | -3.289985000 |
| N | 0.007814000  | 0.132171000  | -0.379388000 |
| C | 1.202165000  | -0.507995000 | -0.920623000 |
| C | -1.095556000 | -1.999962000 | 0.013005000  |
| C | -1.178069000 | -0.662510000 | -0.678328000 |
| C | -2.152787000 | -2.739759000 | 0.399835000  |
| C | -0.043662000 | 1.584873000  | -0.697715000 |
| P | 0.523109000  | 2.578434000  | 0.763635000  |
| O | -0.326008000 | 2.115653000  | 2.046209000  |
| O | 2.006864000  | 1.976744000  | 0.978543000  |
| C | -0.150209000 | 0.900759000  | 2.812617000  |
| C | -0.411314000 | 1.210218000  | 4.271544000  |

|   |              |              |              |
|---|--------------|--------------|--------------|
| C | 3.003748000  | 2.746730000  | 1.699374000  |
| C | 4.376230000  | 2.330205000  | 1.219609000  |
| H | -0.852680000 | 0.159611000  | 2.434454000  |
| H | 0.857600000  | 0.518917000  | 2.658165000  |
| H | 2.819366000  | 3.805948000  | 1.523699000  |
| H | 2.883860000  | 2.545754000  | 2.765947000  |
| H | 4.499135000  | 2.550115000  | 0.159426000  |
| H | 5.140255000  | 2.877928000  | 1.773702000  |
| H | 4.539692000  | 1.263761000  | 1.372665000  |
| H | -1.417223000 | 1.605903000  | 4.410089000  |
| H | -0.315868000 | 0.298173000  | 4.863205000  |
| H | 0.299954000  | 1.944041000  | 4.650573000  |
| H | 1.120280000  | -0.607124000 | -2.020514000 |
| H | -1.306639000 | -0.798276000 | -1.767749000 |
| O | 0.462634000  | 4.040668000  | 0.575134000  |
| H | 2.057885000  | 0.131900000  | -0.717757000 |
| H | -2.060689000 | -0.135210000 | -0.328911000 |
| H | 0.719097000  | 1.799244000  | -1.452142000 |
| C | -4.172608000 | -1.707156000 | -0.737519000 |
| C | -5.818663000 | -3.020028000 | 1.078488000  |
| C | -6.378326000 | -2.199441000 | 0.104465000  |
| C | -5.550091000 | -1.553535000 | -0.806232000 |
| H | -3.557491000 | -1.219604000 | -1.477253000 |
| H | -6.454775000 | -3.537568000 | 1.784065000  |
| H | -7.451314000 | -2.074369000 | 0.048220000  |

|   |              |              |              |
|---|--------------|--------------|--------------|
| H | -5.977961000 | -0.929598000 | -1.579431000 |
| C | -3.587029000 | -2.517033000 | 0.248737000  |
| C | -4.444432000 | -3.184495000 | 1.139997000  |
| H | -4.013762000 | -3.832445000 | 1.892535000  |
| H | -1.888693000 | -3.640980000 | 0.942786000  |
| C | 2.624378000  | -2.474303000 | -0.186623000 |
| C | 4.191347000  | -1.202549000 | -1.725898000 |
| C | 3.948079000  | -2.094045000 | -0.668657000 |
| C | 5.487448000  | -0.902907000 | -2.121034000 |
| C | 5.059998000  | -2.687113000 | -0.046714000 |
| C | 6.354007000  | -2.376758000 | -0.432768000 |
| C | 6.573827000  | -1.479127000 | -1.472480000 |
| H | 5.649672000  | -0.220917000 | -2.945147000 |
| H | 4.893413000  | -3.394733000 | 0.755205000  |
| H | 7.191654000  | -2.841068000 | 0.070297000  |
| H | 7.582207000  | -1.240794000 | -1.782969000 |
| H | 2.595471000  | -3.403655000 | 0.372034000  |
| H | 3.367486000  | -0.766232000 | -2.268244000 |
| O | 0.397620000  | -3.568966000 | 0.991626000  |

A22

|   |              |              |              |
|---|--------------|--------------|--------------|
| C | -0.788257000 | -2.932251000 | 0.016553000  |
| C | -1.953580000 | -1.991024000 | -0.057836000 |
| H | 2.658403000  | 2.300563000  | 4.993708000  |
| C | 1.008108000  | 2.863193000  | 2.083549000  |

|   |              |              |              |
|---|--------------|--------------|--------------|
| C | 1.723802000  | 3.128691000  | 3.243009000  |
| C | 2.096607000  | 2.093290000  | 4.092692000  |
| C | 1.735242000  | 0.792147000  | 3.773532000  |
| C | 1.010966000  | 0.525962000  | 2.616128000  |
| C | 0.645928000  | 1.555227000  | 1.749809000  |
| H | 0.730387000  | 3.683475000  | 1.437543000  |
| H | 1.991096000  | 4.149793000  | 3.481851000  |
| H | 2.010677000  | -0.024741000 | 4.427550000  |
| H | 0.709596000  | -0.485564000 | 2.391058000  |
| N | -0.391384000 | -0.159690000 | 0.262535000  |
| C | -1.660094000 | -0.541537000 | -0.353564000 |
| C | 0.581285000  | -2.356939000 | -0.190488000 |
| C | 0.724870000  | -0.865024000 | -0.364190000 |
| C | 1.601173000  | -3.236837000 | -0.189537000 |
| C | -0.205064000 | 1.261334000  | 0.510294000  |
| P | 0.275035000  | 2.210365000  | -1.036031000 |
| O | -0.156494000 | 3.749413000  | -0.780678000 |
| O | 1.874306000  | 2.256319000  | -0.955963000 |
| C | -1.161250000 | 4.411558000  | -1.591336000 |
| C | -2.492457000 | 4.468833000  | -0.870751000 |
| C | 2.649905000  | 2.891514000  | -2.000986000 |
| C | 4.115525000  | 2.721199000  | -1.670002000 |
| H | -0.770598000 | 5.412280000  | -1.772947000 |
| H | -1.246623000 | 3.886493000  | -2.540940000 |
| H | 2.395658000  | 2.429937000  | -2.955835000 |

|   |              |              |              |
|---|--------------|--------------|--------------|
| H | 2.377718000  | 3.947954000  | -2.041766000 |
| H | 4.725532000  | 3.195389000  | -2.440296000 |
| H | 4.351216000  | 3.179700000  | -0.710267000 |
| H | 4.381725000  | 1.665848000  | -1.620423000 |
| H | -2.391667000 | 4.950472000  | 0.101902000  |
| H | -3.207422000 | 5.041485000  | -1.464159000 |
| H | -2.903480000 | 3.469408000  | -0.726434000 |
| H | -2.446177000 | 0.097356000  | 0.035986000  |
| H | 1.653282000  | -0.530805000 | 0.096720000  |
| O | -0.298040000 | 1.652363000  | -2.285646000 |
| H | -1.637599000 | -0.382203000 | -1.441865000 |
| H | 0.786010000  | -0.612950000 | -1.434945000 |
| H | -1.201137000 | 1.667897000  | 0.709193000  |
| C | 3.613559000  | -1.970937000 | -1.073595000 |
| C | 5.271205000  | -3.923097000 | 0.009502000  |
| C | 5.826116000  | -2.843249000 | -0.669378000 |
| C | 4.990757000  | -1.876313000 | -1.216863000 |
| H | 2.987194000  | -1.223800000 | -1.535192000 |
| H | 5.910908000  | -4.688144000 | 0.428845000  |
| H | 6.899000000  | -2.762653000 | -0.781356000 |
| H | 5.414176000  | -1.046382000 | -1.766989000 |
| C | 3.035070000  | -3.045275000 | -0.379531000 |
| C | 3.895853000  | -4.027044000 | 0.139736000  |
| H | 3.467644000  | -4.875490000 | 0.657746000  |
| H | 1.303965000  | -4.260056000 | 0.013557000  |



|   |              |              |              |
|---|--------------|--------------|--------------|
| C | -3.176695000 | -2.526922000 | 0.074708000  |
| C | -4.782761000 | -0.730948000 | 0.825578000  |
| C | -4.491832000 | -1.869253000 | 0.063837000  |
| C | -6.051753000 | -0.167775000 | 0.809187000  |
| C | -5.526155000 | -2.439903000 | -0.689467000 |
| C | -6.789742000 | -1.867410000 | -0.719302000 |
| C | -7.057440000 | -0.726070000 | 0.028359000  |
| H | -6.258062000 | 0.703811000  | 1.416350000  |
| H | -5.327580000 | -3.335572000 | -1.263935000 |
| H | -7.568987000 | -2.318083000 | -1.319492000 |
| H | -8.044750000 | -0.284397000 | 0.014313000  |
| H | -3.194876000 | -3.607698000 | 0.173172000  |
| H | -4.021288000 | -0.308968000 | 1.466522000  |
| O | -0.951413000 | -4.123448000 | 0.231746000  |

### A23

|   |              |              |              |
|---|--------------|--------------|--------------|
| C | 0.984420000  | -2.670640000 | 0.199089000  |
| C | -0.402752000 | -2.285585000 | -0.207757000 |
| H | -0.781917000 | 3.558391000  | -4.984275000 |
| C | -1.486799000 | 1.985847000  | -2.061392000 |
| C | -1.676312000 | 2.515437000  | -3.332183000 |
| C | -0.630278000 | 3.146079000  | -3.995655000 |
| C | 0.608349000  | 3.252880000  | -3.375597000 |
| C | 0.796457000  | 2.723520000  | -2.104495000 |
| C | -0.242308000 | 2.076599000  | -1.431691000 |

|   |              |              |              |
|---|--------------|--------------|--------------|
| H | -2.315746000 | 1.523912000  | -1.543339000 |
| H | -2.648114000 | 2.440883000  | -3.802197000 |
| H | 1.426587000  | 3.752560000  | -3.877153000 |
| H | 1.761863000  | 2.824430000  | -1.623995000 |
| N | 0.330325000  | 0.029059000  | -0.016120000 |
| C | -0.653855000 | -0.860717000 | -0.632670000 |
| C | 2.072375000  | -1.672635000 | -0.057989000 |
| C | 1.673001000  | -0.286733000 | -0.492488000 |
| C | 3.335912000  | -2.086939000 | 0.149800000  |
| C | 0.025040000  | 1.471152000  | -0.059505000 |
| P | -1.271866000 | 1.836322000  | 1.202364000  |
| O | -0.612383000 | 1.457189000  | 2.615835000  |
| O | -1.196938000 | 3.433885000  | 1.218139000  |
| C | -0.874280000 | 0.189696000  | 3.272268000  |
| C | -0.687930000 | 0.377339000  | 4.761416000  |
| C | -2.170907000 | 4.214782000  | 1.952157000  |
| C | -2.052706000 | 5.655248000  | 1.507403000  |
| H | -1.888189000 | -0.126884000 | 3.030724000  |
| H | -0.174225000 | -0.542794000 | 2.871778000  |
| H | -3.164658000 | 3.813397000  | 1.751963000  |
| H | -1.960943000 | 4.111246000  | 3.018212000  |
| H | -2.261513000 | 5.749013000  | 0.442172000  |
| H | -2.767738000 | 6.270714000  | 2.055439000  |
| H | -1.050797000 | 6.038947000  | 1.698748000  |
| H | 0.320536000  | 0.724220000  | 4.986623000  |

|   |              |              |              |
|---|--------------|--------------|--------------|
| H | -0.845679000 | -0.573095000 | 5.273588000  |
| H | -1.399861000 | 1.102395000  | 5.156029000  |
| H | -1.647481000 | -0.555032000 | -0.312229000 |
| H | 2.371017000  | 0.436691000  | -0.070547000 |
| O | -2.610376000 | 1.237360000  | 0.974696000  |
| H | -0.623968000 | -0.777277000 | -1.732472000 |
| H | 1.737591000  | -0.188835000 | -1.590620000 |
| H | 0.905042000  | 1.967983000  | 0.352687000  |
| C | 5.705103000  | -1.842625000 | 0.732295000  |
| C | 6.060513000  | 0.293219000  | -0.995197000 |
| C | 7.125782000  | -0.151604000 | -0.220768000 |
| C | 6.943220000  | -1.226941000 | 0.642669000  |
| H | 5.570575000  | -2.686153000 | 1.397103000  |
| H | 6.200823000  | 1.112656000  | -1.687682000 |
| H | 8.093052000  | 0.326134000  | -0.299617000 |
| H | 7.769147000  | -1.590276000 | 1.239470000  |
| C | 4.606877000  | -1.388484000 | -0.016945000 |
| C | 4.816414000  | -0.314071000 | -0.895810000 |
| H | 4.016843000  | 0.025346000  | -1.535936000 |
| H | 3.415848000  | -3.096841000 | 0.537346000  |
| C | -1.333573000 | -3.258022000 | -0.149693000 |
| C | -3.549801000 | -4.269745000 | 0.073633000  |
| C | -2.751965000 | -3.258666000 | -0.488849000 |
| C | -4.909284000 | -4.342972000 | -0.182207000 |
| C | -3.372363000 | -2.344527000 | -1.355184000 |

|   |              |              |              |
|---|--------------|--------------|--------------|
| C | -4.731672000 | -2.425941000 | -1.620017000 |
| C | -5.507883000 | -3.416781000 | -1.029937000 |
| H | -5.501522000 | -5.125457000 | 0.273173000  |
| H | -2.790615000 | -1.583476000 | -1.850263000 |
| H | -5.186774000 | -1.712878000 | -2.294345000 |
| H | -6.568093000 | -3.473137000 | -1.237180000 |
| H | -0.964363000 | -4.199057000 | 0.243678000  |
| H | -3.085828000 | -4.997634000 | 0.726749000  |
| O | 1.231203000  | -3.764353000 | 0.685774000  |

#### A24

|   |              |              |              |
|---|--------------|--------------|--------------|
| C | 0.328198000  | -2.261875000 | 0.408416000  |
| C | 1.548092000  | -1.746538000 | -0.287451000 |
| H | -4.167237000 | 4.212144000  | -2.308829000 |
| C | -2.119425000 | 2.407714000  | -0.293486000 |
| C | -3.236679000 | 3.126484000  | -0.706490000 |
| C | -3.299434000 | 3.649627000  | -1.991183000 |
| C | -2.237732000 | 3.447318000  | -2.866679000 |
| C | -1.125491000 | 2.727296000  | -2.453154000 |
| C | -1.048715000 | 2.201393000  | -1.161826000 |
| H | -2.083999000 | 2.009798000  | 0.710455000  |
| H | -4.057958000 | 3.277498000  | -0.018641000 |
| H | -2.274800000 | 3.851862000  | -3.869510000 |
| H | -0.304457000 | 2.565020000  | -3.140224000 |
| N | 0.132487000  | 0.036160000  | -1.288567000 |

|   |              |              |              |
|---|--------------|--------------|--------------|
| C | 1.347278000  | -0.746254000 | -1.411922000 |
| C | -1.007965000 | -1.868638000 | -0.146979000 |
| C | -1.060649000 | -0.779943000 | -1.199362000 |
| C | -2.070936000 | -2.545165000 | 0.330972000  |
| C | 0.191643000  | 1.402311000  | -0.791968000 |
| P | 0.813258000  | 1.617182000  | 0.954495000  |
| O | 0.536360000  | 3.162913000  | 1.316872000  |
| O | -0.224331000 | 0.786019000  | 1.851224000  |
| C | 1.565126000  | 4.051790000  | 1.817552000  |
| C | 1.601175000  | 5.309141000  | 0.975166000  |
| C | 0.095668000  | 0.471465000  | 3.235796000  |
| C | -0.912068000 | -0.530653000 | 3.749853000  |
| H | 1.305959000  | 4.282591000  | 2.851852000  |
| H | 2.519926000  | 3.528569000  | 1.806545000  |
| H | 1.108789000  | 0.073094000  | 3.270888000  |
| H | 0.061427000  | 1.399511000  | 3.810676000  |
| H | -0.708261000 | -0.739224000 | 4.801591000  |
| H | -1.926834000 | -0.140805000 | 3.668887000  |
| H | -0.842571000 | -1.464715000 | 3.195325000  |
| H | 0.627522000  | 5.798309000  | 0.963613000  |
| H | 2.332958000  | 6.007258000  | 1.385707000  |
| H | 1.885128000  | 5.082817000  | -0.052680000 |
| H | 1.291096000  | -1.304813000 | -2.357958000 |
| H | -1.218208000 | -1.244582000 | -2.184459000 |
| O | 2.239286000  | 1.231373000  | 1.111173000  |

|   |              |              |              |
|---|--------------|--------------|--------------|
| H | 2.199656000  | -0.080517000 | -1.495052000 |
| H | -1.921873000 | -0.140306000 | -1.024179000 |
| H | 1.027480000  | 1.871886000  | -1.323993000 |
| C | -4.050430000 | -1.867452000 | -1.120046000 |
| C | -5.751694000 | -3.044708000 | 0.737033000  |
| C | -6.281223000 | -2.431230000 | -0.393382000 |
| C | -5.423441000 | -1.851556000 | -1.321069000 |
| H | -3.413980000 | -1.432714000 | -1.873162000 |
| H | -6.407689000 | -3.509269000 | 1.461145000  |
| H | -7.350696000 | -2.413929000 | -0.554801000 |
| H | -5.824854000 | -1.387042000 | -2.211959000 |
| C | -3.494717000 | -2.468866000 | 0.021717000  |
| C | -4.380794000 | -3.069655000 | 0.933736000  |
| H | -3.973981000 | -3.556513000 | 1.810660000  |
| H | -1.824143000 | -3.264259000 | 1.104508000  |
| C | 2.724864000  | -2.285089000 | 0.069014000  |
| C | 4.922285000  | -3.023214000 | -0.799750000 |
| C | 4.071422000  | -1.972809000 | -0.432258000 |
| C | 6.206085000  | -2.771872000 | -1.262663000 |
| C | 4.561508000  | -0.661936000 | -0.493474000 |
| C | 5.853267000  | -0.416297000 | -0.940932000 |
| C | 6.675645000  | -1.465059000 | -1.337810000 |
| H | 6.843423000  | -3.596051000 | -1.554846000 |
| H | 3.943410000  | 0.151757000  | -0.138415000 |
| H | 6.223055000  | 0.600448000  | -0.968525000 |

|   |             |              |              |
|---|-------------|--------------|--------------|
| H | 7.679986000 | -1.267363000 | -1.688297000 |
| H | 2.667665000 | -3.076591000 | 0.809672000  |
| H | 4.565138000 | -4.042955000 | -0.729748000 |
| O | 0.417118000 | -2.989825000 | 1.388492000  |

## A25

|   |              |              |              |
|---|--------------|--------------|--------------|
| C | -0.744128000 | -2.743696000 | -0.300191000 |
| C | 0.635615000  | -2.259184000 | 0.018780000  |
| H | 1.180361000  | 2.972933000  | 5.324137000  |
| C | 1.622968000  | 1.884473000  | 2.141174000  |
| C | 1.935321000  | 2.266260000  | 3.440332000  |
| C | 0.934111000  | 2.674814000  | 4.313785000  |
| C | -0.384301000 | 2.706550000  | 3.876982000  |
| C | -0.694814000 | 2.327058000  | 2.576808000  |
| C | 0.299683000  | 1.905461000  | 1.692074000  |
| H | 2.413741000  | 1.591895000  | 1.463902000  |
| H | 2.966312000  | 2.250263000  | 3.768388000  |
| H | -1.171121000 | 3.031576000  | 4.544762000  |
| H | -1.724185000 | 2.367857000  | 2.242799000  |
| N | -0.289111000 | 0.012842000  | 0.079604000  |
| C | 0.823235000  | -0.840848000 | 0.498553000  |
| C | -1.884956000 | -1.823716000 | 0.019056000  |
| C | -1.544552000 | -0.490222000 | 0.632692000  |
| C | -3.124787000 | -2.287141000 | -0.202586000 |
| C | -0.096933000 | 1.459564000  | 0.289843000  |

|   |              |              |              |
|---|--------------|--------------|--------------|
| P | 0.992481000  | 2.112524000  | -1.049629000 |
| O | 0.146404000  | 1.922687000  | -2.401401000 |
| O | 0.859894000  | 3.680492000  | -0.761406000 |
| C | 0.502198000  | 0.950972000  | -3.419482000 |
| C | -0.699276000 | 0.092176000  | -3.746423000 |
| C | 1.747219000  | 4.646823000  | -1.376266000 |
| C | 1.016277000  | 5.441935000  | -2.438820000 |
| H | 0.827140000  | 1.521145000  | -4.290696000 |
| H | 1.345273000  | 0.358023000  | -3.069320000 |
| H | 2.085365000  | 5.291099000  | -0.565548000 |
| H | 2.616889000  | 4.129360000  | -1.781792000 |
| H | 1.681666000  | 6.201264000  | -2.853863000 |
| H | 0.680117000  | 4.797111000  | -3.249890000 |
| H | 0.146332000  | 5.943298000  | -2.014869000 |
| H | -1.535061000 | 0.705263000  | -4.084495000 |
| H | -0.444186000 | -0.607696000 | -4.544048000 |
| H | -1.013054000 | -0.479426000 | -2.874565000 |
| H | 0.924892000  | -0.831693000 | 1.597038000  |
| H | -2.331154000 | 0.232615000  | 0.444361000  |
| O | 2.371314000  | 1.567760000  | -1.119901000 |
| H | 1.744569000  | -0.435920000 | 0.084541000  |
| H | -1.480162000 | -0.603447000 | 1.729496000  |
| H | -1.059105000 | 1.921146000  | 0.062236000  |
| C | -4.699992000 | -0.328110000 | -0.444225000 |
| C | -6.710877000 | -1.785252000 | 0.796899000  |



|   |              |              |              |
|---|--------------|--------------|--------------|
| C | -6.963400000 | -0.486442000 | 0.369740000  |
| C | -5.956105000 | 0.234478000  | -0.261537000 |
| H | -3.939524000 | 0.231530000  | -0.970706000 |
| H | -7.491890000 | -2.360491000 | 1.276122000  |
| H | -7.940457000 | -0.045408000 | 0.514091000  |
| H | -6.151196000 | 1.235716000  | -0.622409000 |
| C | -4.423754000 | -1.628334000 | -0.003089000 |
| C | -5.460668000 | -2.353598000 | 0.598864000  |
| H | -5.274598000 | -3.370143000 | 0.920971000  |
| H | -3.170291000 | -3.314292000 | -0.550727000 |
| C | 1.630626000  | -3.152589000 | -0.154026000 |
| C | 3.882496000  | -4.009423000 | -0.568556000 |
| C | 3.067800000  | -3.060951000 | 0.074122000  |
| C | 5.259498000  | -3.999361000 | -0.418936000 |
| C | 3.695559000  | -2.120929000 | 0.907478000  |
| C | 5.073758000  | -2.119563000 | 1.066078000  |
| C | 5.862654000  | -3.049837000 | 0.399253000  |
| H | 5.862598000  | -4.735165000 | -0.933925000 |
| H | 3.109233000  | -1.404292000 | 1.459244000  |
| H | 5.534034000  | -1.388812000 | 1.717593000  |
| H | 6.937174000  | -3.041142000 | 0.523858000  |
| H | 1.301276000  | -4.104847000 | -0.555460000 |
| H | 3.416067000  | -4.755719000 | -1.198668000 |
| O | -0.941779000 | -3.844634000 | -0.791743000 |

A26

|   |              |              |              |
|---|--------------|--------------|--------------|
| C | 0.037082000  | -2.847970000 | 0.389573000  |
| C | 1.281788000  | -2.169457000 | -0.080928000 |
| H | -4.813992000 | 3.659088000  | 0.653523000  |
| C | -1.966481000 | 1.854257000  | 1.023942000  |
| C | -3.168864000 | 2.465700000  | 1.352374000  |
| C | -3.877146000 | 3.183921000  | 0.394986000  |
| C | -3.375833000 | 3.281892000  | -0.896900000 |
| C | -2.174613000 | 2.665330000  | -1.225524000 |
| C | -1.455499000 | 1.947592000  | -0.271613000 |
| H | -1.421515000 | 1.294275000  | 1.769284000  |
| H | -3.554594000 | 2.380038000  | 2.359598000  |
| H | -3.920090000 | 3.834447000  | -1.651318000 |
| H | -1.789286000 | 2.746330000  | -2.233937000 |
| N | -0.063440000 | -0.117320000 | -0.231441000 |
| C | 1.166266000  | -0.787862000 | -0.666511000 |
| C | -1.258119000 | -2.239765000 | -0.046408000 |
| C | -1.211956000 | -0.892117000 | -0.714631000 |
| C | -2.374291000 | -2.947515000 | 0.208347000  |
| C | -0.138223000 | 1.292512000  | -0.651224000 |
| P | 1.286110000  | 2.306297000  | 0.003311000  |
| O | 0.806413000  | 3.754994000  | -0.475316000 |
| O | 1.130026000  | 2.355777000  | 1.599721000  |
| C | 1.677868000  | 4.899777000  | -0.312511000 |
| C | 1.049339000  | 6.076254000  | -1.024779000 |

|   |              |              |              |
|---|--------------|--------------|--------------|
| C | 2.123841000  | 1.813023000  | 2.508478000  |
| C | 1.514168000  | 0.716321000  | 3.354763000  |
| H | 1.788046000  | 5.099661000  | 0.755124000  |
| H | 2.657653000  | 4.656685000  | -0.724596000 |
| H | 2.973648000  | 1.455814000  | 1.929247000  |
| H | 2.454133000  | 2.648591000  | 3.126122000  |
| H | 1.173577000  | -0.112862000 | 2.735863000  |
| H | 2.260304000  | 0.338074000  | 4.055787000  |
| H | 0.667008000  | 1.092171000  | 3.928643000  |
| H | 0.065899000  | 6.298809000  | -0.612078000 |
| H | 1.681173000  | 6.958021000  | -0.908203000 |
| H | 0.940101000  | 5.870085000  | -2.089230000 |
| H | 1.199874000  | -0.836574000 | -1.772371000 |
| H | -1.160046000 | -0.999764000 | -1.815205000 |
| O | 2.644018000  | 1.915942000  | -0.452916000 |
| H | 2.020492000  | -0.192566000 | -0.364761000 |
| H | -2.126985000 | -0.351477000 | -0.495204000 |
| H | -0.018951000 | 1.383438000  | -1.744372000 |
| C | -4.213260000 | -1.866898000 | -1.163852000 |
| C | -6.102258000 | -3.091756000 | 0.466374000  |
| C | -6.517220000 | -2.270960000 | -0.577278000 |
| C | -5.567429000 | -1.668983000 | -1.394505000 |
| H | -3.498379000 | -1.416562000 | -1.834941000 |
| H | -6.833150000 | -3.575885000 | 1.100289000  |
| H | -7.571577000 | -2.112529000 | -0.759998000 |

|   |              |              |              |
|---|--------------|--------------|--------------|
| H | -5.881923000 | -1.046688000 | -2.221720000 |
| C | -3.773903000 | -2.676935000 | -0.105193000 |
| C | -4.750816000 | -3.299873000 | 0.689498000  |
| H | -4.432304000 | -3.947432000 | 1.496214000  |
| H | -2.201032000 | -3.861903000 | 0.765790000  |
| C | 2.426517000  | -2.872074000 | 0.041974000  |
| C | 4.788255000  | -3.470832000 | 0.149111000  |
| C | 3.807474000  | -2.580481000 | -0.325144000 |
| C | 6.132206000  | -3.286317000 | -0.129947000 |
| C | 4.238262000  | -1.501637000 | -1.116888000 |
| C | 5.584723000  | -1.320688000 | -1.397990000 |
| C | 6.537481000  | -2.205637000 | -0.906047000 |
| H | 6.863015000  | -3.985784000 | 0.253640000  |
| H | 3.533591000  | -0.796331000 | -1.524082000 |
| H | 5.889283000  | -0.479872000 | -2.006546000 |
| H | 7.585486000  | -2.057217000 | -1.129785000 |
| H | 2.292484000  | -3.837567000 | 0.517626000  |
| H | 4.476778000  | -4.315409000 | 0.750130000  |
| O | 0.071735000  | -3.871118000 | 1.057585000  |

A27

|   |              |              |              |
|---|--------------|--------------|--------------|
| C | 0.495914000  | -2.216067000 | 0.500423000  |
| C | 1.691265000  | -1.676653000 | -0.220890000 |
| H | -4.473891000 | 3.666221000  | -2.562404000 |
| C | -1.300786000 | 2.481925000  | -2.646843000 |

|   |              |              |              |
|---|--------------|--------------|--------------|
| C | -2.472158000 | 3.084681000  | -3.085027000 |
| C | -3.559856000 | 3.195482000  | -2.225664000 |
| C | -3.464222000 | 2.698993000  | -0.932193000 |
| C | -2.288644000 | 2.097893000  | -0.494833000 |
| C | -1.190948000 | 1.983438000  | -1.347020000 |
| H | -0.459106000 | 2.389779000  | -3.321848000 |
| H | -2.534887000 | 3.468835000  | -4.094568000 |
| H | -4.305821000 | 2.778147000  | -0.257093000 |
| H | -2.228198000 | 1.719611000  | 0.515404000  |
| N | 0.177999000  | -0.075439000 | -1.390943000 |
| C | 1.456743000  | -0.760777000 | -1.411112000 |
| C | -0.855807000 | -1.934313000 | -0.083271000 |
| C | -0.941756000 | -0.986749000 | -1.260845000 |
| C | -1.899584000 | -2.560908000 | 0.492489000  |
| C | 0.113799000  | 1.312867000  | -0.947909000 |
| P | 0.713549000  | 1.680728000  | 0.784873000  |
| O | 0.271978000  | 3.193057000  | 1.134950000  |
| O | -0.233547000 | 0.815846000  | 1.739548000  |
| C | 1.181565000  | 4.310993000  | 1.004923000  |
| C | 0.913839000  | 5.291379000  | 2.126313000  |
| C | 0.073958000  | 0.699904000  | 3.158765000  |
| C | -0.795182000 | -0.384123000 | 3.752999000  |
| H | 2.204828000  | 3.938785000  | 1.034520000  |
| H | 1.001508000  | 4.774296000  | 0.032721000  |
| H | 1.132572000  | 0.463961000  | 3.262010000  |

|   |              |              |              |
|---|--------------|--------------|--------------|
| H | -0.118966000 | 1.668376000  | 3.623238000  |
| H | -0.593166000 | -0.461338000 | 4.822799000  |
| H | -1.852242000 | -0.152657000 | 3.620997000  |
| H | -0.580077000 | -1.346100000 | 3.291033000  |
| H | 1.115053000  | 4.835503000  | 3.095628000  |
| H | 1.560406000  | 6.163701000  | 2.016775000  |
| H | -0.122624000 | 5.627800000  | 2.109362000  |
| H | 1.489821000  | -1.375371000 | -2.322327000 |
| H | -0.988550000 | -1.573593000 | -2.189929000 |
| O | 2.175300000  | 1.459587000  | 0.925893000  |
| H | 2.254369000  | -0.030942000 | -1.499303000 |
| H | -1.866244000 | -0.417493000 | -1.214440000 |
| H | 0.904647000  | 1.828042000  | -1.506329000 |
| C | -3.874759000 | -2.210474000 | -1.067325000 |
| C | -5.586785000 | -2.905035000 | 1.009703000  |
| C | -6.110776000 | -2.557479000 | -0.231196000 |
| C | -5.248070000 | -2.220763000 | -1.267815000 |
| H | -3.230242000 | -1.976452000 | -1.899521000 |
| H | -6.247593000 | -3.182239000 | 1.820257000  |
| H | -7.180448000 | -2.561327000 | -0.392235000 |
| H | -5.645760000 | -1.969971000 | -2.242253000 |
| C | -3.325887000 | -2.540610000 | 0.182371000  |
| C | -4.215559000 | -2.907317000 | 1.206993000  |
| H | -3.812284000 | -3.189417000 | 2.171049000  |
| H | -1.636749000 | -3.163648000 | 1.355176000  |

|   |             |              |              |
|---|-------------|--------------|--------------|
| C | 2.892257000 | -2.126980000 | 0.175563000  |
| C | 5.131810000 | -2.787576000 | -0.650448000 |
| C | 4.223022000 | -1.768637000 | -0.337430000 |
| C | 6.401805000 | -2.488694000 | -1.123328000 |
| C | 4.640089000 | -0.437345000 | -0.463202000 |
| C | 5.918437000 | -0.143056000 | -0.919796000 |
| C | 6.798946000 | -1.163260000 | -1.262691000 |
| H | 7.084851000 | -3.289779000 | -1.373461000 |
| H | 3.975329000 | 0.357714000  | -0.152722000 |
| H | 6.231450000 | 0.889996000  | -0.997616000 |
| H | 7.792316000 | -0.928161000 | -1.621284000 |
| H | 2.872825000 | -2.874493000 | 0.962392000  |
| H | 4.831199000 | -3.820814000 | -0.530547000 |
| O | 0.618823000 | -2.871521000 | 1.526834000  |

#### A28

|   |              |              |              |
|---|--------------|--------------|--------------|
| C | -0.056676000 | -2.818363000 | 0.471329000  |
| C | 1.202724000  | -2.192792000 | -0.032371000 |
| H | -4.719045000 | 3.831357000  | 0.500971000  |
| C | -1.916119000 | 1.967746000  | 0.917490000  |
| C | -3.096441000 | 2.627159000  | 1.233133000  |
| C | -3.799695000 | 3.318226000  | 0.252357000  |
| C | -3.315622000 | 3.341158000  | -1.049576000 |
| C | -2.136704000 | 2.676684000  | -1.365132000 |
| C | -1.423175000 | 1.984868000  | -0.388153000 |

|   |              |              |              |
|---|--------------|--------------|--------------|
| H | -1.373883000 | 1.430193000  | 1.681117000  |
| H | -3.468285000 | 2.601205000  | 2.248852000  |
| H | -3.856116000 | 3.872466000  | -1.821763000 |
| H | -1.764704000 | 2.698920000  | -2.381541000 |
| N | -0.088929000 | -0.113936000 | -0.267210000 |
| C | 1.119954000  | -0.835365000 | -0.677304000 |
| C | -1.337860000 | -2.195786000 | 0.015473000  |
| C | -1.261803000 | -0.877754000 | -0.706763000 |
| C | -2.470088000 | -2.865808000 | 0.300301000  |
| C | -0.130050000 | 1.275399000  | -0.753279000 |
| P | 1.330134000  | 2.281391000  | -0.171130000 |
| O | 0.876551000  | 3.717995000  | -0.705101000 |
| O | 1.203155000  | 2.385615000  | 1.425333000  |
| C | 1.820317000  | 4.810531000  | -0.838015000 |
| C | 1.648350000  | 5.810059000  | 0.287771000  |
| C | 2.194988000  | 1.843677000  | 2.336639000  |
| C | 1.560366000  | 0.811075000  | 3.243388000  |
| H | 2.831975000  | 4.406422000  | -0.875171000 |
| H | 1.599610000  | 5.265736000  | -1.802615000 |
| H | 2.572281000  | 2.690393000  | 2.910792000  |
| H | 3.017452000  | 1.427690000  | 1.757142000  |
| H | 1.172504000  | -0.029486000 | 2.669367000  |
| H | 2.306026000  | 0.433509000  | 3.945286000  |
| H | 0.742340000  | 1.246920000  | 3.817102000  |
| H | 1.879116000  | 5.361154000  | 1.253115000  |



|   |              |              |              |
|---|--------------|--------------|--------------|
| H | 2.320126000  | 6.656372000  | 0.132600000  |
| H | 0.625185000  | 6.183417000  | 0.319085000  |
| H | 1.148260000  | -0.932940000 | -1.780056000 |
| H | -1.224787000 | -1.031464000 | -1.802497000 |
| O | 2.670941000  | 1.842599000  | -0.635531000 |
| H | 1.991123000  | -0.250585000 | -0.404524000 |
| H | -2.159796000 | -0.304201000 | -0.500532000 |
| H | -0.024802000 | 1.310147000  | -1.851144000 |
| C | -4.851862000 | -3.149741000 | 0.798331000  |
| C | -5.639620000 | -1.566364000 | -1.332864000 |
| C | -6.599522000 | -2.121091000 | -0.494268000 |
| C | -6.199152000 | -2.918323000 | 0.573085000  |
| H | -4.544874000 | -3.778974000 | 1.623805000  |
| H | -5.943327000 | -0.962855000 | -2.177836000 |
| H | -7.650745000 | -1.944458000 | -0.678388000 |
| H | -6.938296000 | -3.365839000 | 1.224105000  |
| C | -3.864171000 | -2.574043000 | -0.018487000 |
| C | -4.289344000 | -1.787519000 | -1.100557000 |
| H | -3.567372000 | -1.374038000 | -1.787482000 |
| H | -2.316751000 | -3.762218000 | 0.891694000  |
| C | 2.329310000  | -2.919228000 | 0.116586000  |
| C | 4.672968000  | -3.581133000 | 0.236802000  |
| C | 3.715927000  | -2.681338000 | -0.267262000 |
| C | 6.020208000  | -3.447097000 | -0.054709000 |
| C | 4.173835000  | -1.646215000 | -1.101157000 |

|   |              |              |              |
|---|--------------|--------------|--------------|
| C | 5.523606000  | -1.515847000 | -1.394399000 |
| C | 6.452777000  | -2.409154000 | -0.873158000 |
| H | 6.732174000  | -4.152777000 | 0.352229000  |
| H | 3.488177000  | -0.935862000 | -1.531742000 |
| H | 5.849346000  | -0.708017000 | -2.035783000 |
| H | 7.503429000  | -2.300288000 | -1.106956000 |
| H | 2.171564000  | -3.859320000 | 0.633925000  |
| H | 4.340333000  | -4.392864000 | 0.870858000  |
| O | -0.044682000 | -3.813052000 | 1.181803000  |

#### A29

|   |              |              |              |
|---|--------------|--------------|--------------|
| C | -0.368486000 | -2.647050000 | 0.442013000  |
| C | 0.933655000  | -2.074372000 | -0.023793000 |
| H | -4.650339000 | 4.216849000  | 0.732222000  |
| C | -1.986276000 | 2.145624000  | 1.057802000  |
| C | -3.128891000 | 2.855178000  | 1.401216000  |
| C | -3.761690000 | 3.662159000  | 0.462269000  |
| C | -3.244498000 | 3.752961000  | -0.823733000 |
| C | -2.103192000 | 3.039199000  | -1.167317000 |
| C | -1.463449000 | 2.227385000  | -0.233704000 |
| H | -1.498334000 | 1.520162000  | 1.791491000  |
| H | -3.523793000 | 2.780282000  | 2.405636000  |
| H | -3.726263000 | 4.381814000  | -1.560491000 |
| H | -1.698018000 | 3.124176000  | -2.167174000 |
| N | -0.234076000 | 0.061475000  | -0.221973000 |

|   |              |              |              |
|---|--------------|--------------|--------------|
| C | 0.914080000  | -0.721236000 | -0.687361000 |
| C | -1.605280000 | -1.957301000 | -0.032646000 |
| C | -1.455215000 | -0.609330000 | -0.686159000 |
| C | -2.771584000 | -2.596731000 | 0.180355000  |
| C | -0.195167000 | 1.479466000  | -0.619615000 |
| P | 1.196357000  | 2.510964000  | 0.086266000  |
| O | 1.284739000  | 2.225288000  | 1.659950000  |
| O | 2.536927000  | 1.882344000  | -0.562374000 |
| C | 1.818214000  | 1.038975000  | 2.293650000  |
| C | 2.083436000  | 1.363469000  | 3.747453000  |
| C | 3.721528000  | 2.710634000  | -0.726012000 |
| C | 4.270212000  | 2.525571000  | -2.123522000 |
| H | 1.091209000  | 0.234178000  | 2.192199000  |
| H | 2.735776000  | 0.743275000  | 1.783642000  |
| H | 4.442190000  | 2.392356000  | 0.028288000  |
| H | 3.450865000  | 3.749271000  | -0.543810000 |
| H | 5.183106000  | 3.112192000  | -2.240088000 |
| H | 4.509566000  | 1.479793000  | -2.314683000 |
| H | 3.550128000  | 2.862301000  | -2.868775000 |
| H | 1.165876000  | 1.669422000  | 4.249047000  |
| H | 2.475716000  | 0.480989000  | 4.255201000  |
| H | 2.810768000  | 2.169579000  | 3.840321000  |
| H | 1.834701000  | -0.195172000 | -0.462445000 |
| H | -1.436166000 | -0.705521000 | -1.788476000 |
| O | 1.016752000  | 3.947208000  | -0.197175000 |

|   |              |              |              |
|---|--------------|--------------|--------------|
| H | 0.879015000  | -0.825014000 | -1.788882000 |
| H | -2.316752000 | 0.002818000  | -0.440300000 |
| H | -0.061694000 | 1.583147000  | -1.708932000 |
| C | -4.502387000 | -1.359732000 | -1.202610000 |
| C | -6.507454000 | -2.565921000 | 0.298452000  |
| C | -6.843044000 | -1.676296000 | -0.716900000 |
| C | -5.835740000 | -1.083501000 | -1.469558000 |
| H | -3.743391000 | -0.911127000 | -1.823796000 |
| H | -7.283888000 | -3.042080000 | 0.882166000  |
| H | -7.880940000 | -1.455861000 | -0.927352000 |
| H | -6.088979000 | -0.405730000 | -2.273794000 |
| C | -4.141958000 | -2.241548000 | -0.171348000 |
| C | -5.176915000 | -2.851713000 | 0.557655000  |
| H | -4.920407000 | -3.551883000 | 1.342206000  |
| H | -2.672096000 | -3.524761000 | 0.733053000  |
| C | 2.030809000  | -2.820209000 | 0.204805000  |
| C | 3.878054000  | -1.799618000 | -1.202039000 |
| C | 3.432008000  | -2.604032000 | -0.141908000 |
| C | 5.232993000  | -1.667008000 | -1.472440000 |
| C | 4.401210000  | -3.282693000 | 0.616118000  |
| C | 5.754169000  | -3.136292000 | 0.355628000  |
| C | 6.177034000  | -2.324648000 | -0.691834000 |
| H | 5.553508000  | -1.055191000 | -2.305268000 |
| H | 4.075791000  | -3.926777000 | 1.422864000  |
| H | 6.479067000  | -3.663215000 | 0.961564000  |

|   |              |              |              |
|---|--------------|--------------|--------------|
| H | 7.231667000  | -2.216788000 | -0.906649000 |
| H | 1.837697000  | -3.729583000 | 0.764001000  |
| H | 3.166546000  | -1.301610000 | -1.842172000 |
| O | -0.415418000 | -3.651767000 | 1.135787000  |

### A30

|   |              |              |              |
|---|--------------|--------------|--------------|
| C | 0.183995000  | -2.099784000 | 0.134238000  |
| C | 1.383351000  | -1.516443000 | -0.549041000 |
| H | -3.930861000 | 4.987370000  | -1.923282000 |
| C | -2.080630000 | 2.971311000  | 0.082898000  |
| C | -3.118117000 | 3.804020000  | -0.326787000 |
| C | -3.126471000 | 4.336054000  | -1.608368000 |
| C | -2.088984000 | 4.030689000  | -2.484165000 |
| C | -1.058228000 | 3.198049000  | -2.074090000 |
| C | -1.038230000 | 2.657748000  | -0.785849000 |
| H | -2.085980000 | 2.580730000  | 1.090006000  |
| H | -3.917030000 | 4.038468000  | 0.363888000  |
| H | -2.081653000 | 4.444596000  | -3.483878000 |
| H | -0.256911000 | 2.957159000  | -2.761531000 |
| N | -0.013827000 | 0.440431000  | -1.092008000 |
| C | 1.148327000  | -0.333894000 | -1.465140000 |
| C | -1.162369000 | -1.620325000 | -0.311674000 |
| C | -1.246246000 | -0.316249000 | -1.075554000 |
| C | -2.203707000 | -2.422054000 | -0.011050000 |
| C | 0.113935000  | 1.724375000  | -0.426599000 |

|   |              |              |              |
|---|--------------|--------------|--------------|
| P | 0.528963000  | 1.718753000  | 1.398827000  |
| O | -0.438521000 | 0.571045000  | 1.966628000  |
| O | 1.991963000  | 1.032341000  | 1.440145000  |
| C | -0.357361000 | 0.172245000  | 3.360415000  |
| C | -1.398019000 | -0.893428000 | 3.618647000  |
| C | 3.139105000  | 1.703255000  | 2.016740000  |
| C | 4.044032000  | 2.258621000  | 0.935900000  |
| H | 0.646823000  | -0.211016000 | 3.548627000  |
| H | -0.519006000 | 1.054235000  | 3.981455000  |
| H | 2.789128000  | 2.492031000  | 2.680367000  |
| H | 3.653862000  | 0.944476000  | 2.605475000  |
| H | 4.933462000  | 2.698495000  | 1.390960000  |
| H | 4.364098000  | 1.473736000  | 0.250807000  |
| H | 3.537846000  | 3.040296000  | 0.368333000  |
| H | -1.208786000 | -1.772592000 | 3.005005000  |
| H | -1.361296000 | -1.188531000 | 4.668757000  |
| H | -2.398828000 | -0.519510000 | 3.403274000  |
| H | 1.014185000  | -0.686438000 | -2.499948000 |
| H | -1.543430000 | -0.526269000 | -2.114725000 |
| O | 0.483272000  | 3.025115000  | 2.097348000  |
| H | 2.022933000  | 0.314192000  | -1.467086000 |
| H | -2.034266000 | 0.302608000  | -0.652037000 |
| H | 1.019900000  | 2.183930000  | -0.833955000 |
| C | -4.464917000 | -3.275109000 | 0.329073000  |
| C | -5.620835000 | -1.371590000 | -1.310757000 |

|   |              |              |              |
|---|--------------|--------------|--------------|
| C | -6.423951000 | -2.314489000 | -0.679597000 |
| C | -5.837392000 | -3.270461000 | 0.142785000  |
| H | -4.014011000 | -4.024445000 | 0.966750000  |
| H | -6.066800000 | -0.629433000 | -1.959523000 |
| H | -7.494971000 | -2.307421000 | -0.831190000 |
| H | -6.449819000 | -4.013722000 | 0.635652000  |
| C | -3.632266000 | -2.323377000 | -0.287570000 |
| C | -4.246391000 | -1.371482000 | -1.120385000 |
| H | -3.657680000 | -0.633609000 | -1.638639000 |
| H | -1.929705000 | -3.302699000 | 0.559283000  |
| C | 2.570763000  | -2.085483000 | -0.274834000 |
| C | 4.173959000  | -1.184630000 | -2.021038000 |
| C | 3.906543000  | -1.787224000 | -0.781559000 |
| C | 5.478188000  | -0.937688000 | -2.427543000 |
| C | 5.004371000  | -2.156656000 | 0.013689000  |
| C | 6.305538000  | -1.898558000 | -0.386915000 |
| C | 6.548779000  | -1.283018000 | -1.610600000 |
| H | 5.659328000  | -0.481930000 | -3.391994000 |
| H | 4.820572000  | -2.646966000 | 0.961002000  |
| H | 7.131603000  | -2.185531000 | 0.250065000  |
| H | 7.563347000  | -1.088013000 | -1.930963000 |
| H | 2.531189000  | -2.871549000 | 0.471767000  |
| H | 3.363372000  | -0.942677000 | -2.691001000 |
| O | 0.298423000  | -2.967353000 | 0.989418000  |

A31

|   |              |              |              |
|---|--------------|--------------|--------------|
| C | -0.009089000 | -2.886185000 | 0.456479000  |
| C | 1.243385000  | -2.228043000 | -0.026731000 |
| H | -4.772347000 | 3.699656000  | 0.536924000  |
| C | -1.930258000 | 1.891992000  | 0.939292000  |
| C | -3.120885000 | 2.530091000  | 1.261907000  |
| C | -3.846175000 | 3.201560000  | 0.282957000  |
| C | -3.373325000 | 3.226170000  | -1.023171000 |
| C | -2.183047000 | 2.584834000  | -1.344640000 |
| C | -1.447018000 | 1.913214000  | -0.370324000 |
| H | -1.371492000 | 1.370156000  | 1.702177000  |
| H | -3.481930000 | 2.504917000  | 2.281601000  |
| H | -3.931305000 | 3.740659000  | -1.794176000 |
| H | -1.820930000 | 2.607777000  | -2.364510000 |
| N | -0.073861000 | -0.153824000 | -0.245323000 |
| C | 1.160776000  | -0.848108000 | -0.624373000 |
| C | -1.301812000 | -2.243755000 | 0.059829000  |
| C | -1.211606000 | -0.955811000 | -0.714999000 |
| C | -2.425943000 | -2.920714000 | 0.351190000  |
| C | -0.140468000 | 1.232616000  | -0.739924000 |
| P | 1.301470000  | 2.260090000  | -0.146810000 |
| O | 0.807013000  | 3.710225000  | -0.595123000 |
| O | 1.208045000  | 2.338386000  | 1.455672000  |
| C | 1.703396000  | 4.846164000  | -0.508364000 |
| C | 1.062543000  | 6.007537000  | -1.233902000 |



|   |              |              |              |
|---|--------------|--------------|--------------|
| C | 1.994983000  | 1.469869000  | 2.311888000  |
| C | 2.115280000  | 2.124120000  | 3.669966000  |
| H | 1.860926000  | 5.077372000  | 0.546382000  |
| H | 2.660492000  | 4.572113000  | -0.952579000 |
| H | 2.970912000  | 1.316391000  | 1.852971000  |
| H | 1.483823000  | 0.508701000  | 2.380057000  |
| H | 1.132717000  | 2.296503000  | 4.108695000  |
| H | 2.681529000  | 1.475673000  | 4.340192000  |
| H | 2.634193000  | 3.079818000  | 3.597177000  |
| H | 0.099467000  | 6.258044000  | -0.790315000 |
| H | 1.710362000  | 6.883160000  | -1.171106000 |
| H | 0.908301000  | 5.769110000  | -2.285977000 |
| H | 1.235817000  | -0.908877000 | -1.727113000 |
| H | -1.095576000 | -1.181768000 | -1.792038000 |
| O | 2.637435000  | 1.860566000  | -0.654226000 |
| H | 2.013287000  | -0.262603000 | -0.298916000 |
| H | -2.121482000 | -0.381778000 | -0.620244000 |
| H | -0.037080000 | 1.266505000  | -1.837876000 |
| C | -4.412238000 | -1.348723000 | 0.145154000  |
| C | -6.028359000 | -3.522658000 | -0.475543000 |
| C | -6.576744000 | -2.245906000 | -0.429031000 |
| C | -5.764780000 | -1.164396000 | -0.105799000 |
| H | -3.814801000 | -0.495840000 | 0.430540000  |
| H | -6.652741000 | -4.374514000 | -0.710110000 |
| H | -7.629458000 | -2.096673000 | -0.628311000 |

|   |              |              |              |
|---|--------------|--------------|--------------|
| H | -6.185973000 | -0.170003000 | -0.041418000 |
| C | -3.837624000 | -2.625734000 | 0.082340000  |
| C | -4.680512000 | -3.709339000 | -0.208364000 |
| H | -4.261596000 | -4.707213000 | -0.232399000 |
| H | -2.249697000 | -3.880185000 | 0.827076000  |
| C | 2.377884000  | -2.947537000 | 0.098853000  |
| C | 4.218039000  | -1.600312000 | -1.045987000 |
| C | 3.763398000  | -2.680794000 | -0.269172000 |
| C | 5.567963000  | -1.448233000 | -1.328320000 |
| C | 4.724464000  | -3.600429000 | 0.190182000  |
| C | 6.071556000  | -3.444615000 | -0.090508000 |
| C | 6.500466000  | -2.363106000 | -0.852679000 |
| H | 5.890737000  | -0.605929000 | -1.925298000 |
| H | 4.394614000  | -4.445501000 | 0.780594000  |
| H | 6.786337000  | -4.166739000 | 0.281076000  |
| H | 7.551077000  | -2.236805000 | -1.077790000 |
| H | 2.228447000  | -3.909054000 | 0.577762000  |
| H | 3.531696000  | -0.870098000 | -1.440315000 |
| O | 0.017652000  | -3.911700000 | 1.120859000  |

A32

|   |              |              |              |
|---|--------------|--------------|--------------|
| C | -0.939789000 | 2.552989000  | -0.166054000 |
| C | 0.429876000  | 2.022178000  | -0.459508000 |
| H | 0.823725000  | -4.211934000 | -4.584935000 |
| C | -0.931975000 | -3.028513000 | -1.939724000 |

|   |              |              |              |
|---|--------------|--------------|--------------|
| C | -0.674694000 | -3.672656000 | -3.143675000 |
| C | 0.618017000  | -3.707463000 | -3.650415000 |
| C | 1.647446000  | -3.099989000 | -2.941313000 |
| C | 1.386774000  | -2.456445000 | -1.737982000 |
| C | 0.090268000  | -2.405935000 | -1.221063000 |
| H | -1.941237000 | -3.019418000 | -1.547701000 |
| H | -1.482625000 | -4.152186000 | -3.680121000 |
| H | 2.659991000  | -3.134891000 | -3.321289000 |
| H | 2.201580000  | -2.007266000 | -1.188553000 |
| N | -0.457614000 | -0.216284000 | -0.022712000 |
| C | 0.605143000  | 0.539843000  | -0.681932000 |
| C | -2.081535000 | 1.586531000  | -0.251059000 |
| C | -1.754173000 | 0.154097000  | -0.589422000 |
| C | -3.317150000 | 2.086838000  | -0.090862000 |
| C | -0.254776000 | -1.673118000 | 0.070095000  |
| P | 0.770333000  | -2.177413000 | 1.526291000  |
| O | 2.186511000  | -1.421533000 | 1.328982000  |
| O | 0.085848000  | -1.489467000 | 2.803025000  |
| C | 3.339115000  | -1.874922000 | 2.089806000  |
| C | 4.587048000  | -1.290539000 | 1.467758000  |
| C | 0.186629000  | -0.103224000 | 3.204003000  |
| C | -0.149133000 | -0.013638000 | 4.676904000  |
| H | 3.222986000  | -1.542374000 | 3.123379000  |
| H | 3.351609000  | -2.964072000 | 2.079734000  |
| H | 1.196929000  | 0.255958000  | 3.005531000  |

|   |              |              |              |
|---|--------------|--------------|--------------|
| H | -0.504002000 | 0.480030000  | 2.598004000  |
| H | 0.551953000  | -0.595140000 | 5.275369000  |
| H | -0.103177000 | 1.026994000  | 5.001907000  |
| H | -1.154467000 | -0.388609000 | 4.866980000  |
| H | 4.551193000  | -0.201580000 | 1.457953000  |
| H | 5.460934000  | -1.600612000 | 2.042836000  |
| H | 4.712319000  | -1.640822000 | 0.443469000  |
| H | 1.563807000  | 0.226412000  | -0.276569000 |
| H | -2.514112000 | -0.515481000 | -0.201510000 |
| O | 0.853414000  | -3.640577000 | 1.690796000  |
| H | 0.624276000  | 0.321012000  | -1.763095000 |
| H | -1.760328000 | 0.030240000  | -1.686822000 |
| H | -1.215584000 | -2.073538000 | 0.403457000  |
| C | -4.879152000 | 0.218491000  | 0.582534000  |
| C | -6.927357000 | 1.406997000  | -0.867193000 |
| C | -7.164010000 | 0.218810000  | -0.184865000 |
| C | -6.138162000 | -0.365578000 | 0.549301000  |
| H | -4.104263000 | -0.227539000 | 1.189951000  |
| H | -7.722830000 | 1.877875000  | -1.429269000 |
| H | -8.143206000 | -0.239809000 | -0.212406000 |
| H | -6.320486000 | -1.274742000 | 1.106728000  |
| C | -4.618731000 | 1.404618000  | -0.115202000 |
| C | -5.673994000 | 1.999934000  | -0.819464000 |
| H | -5.499626000 | 2.931948000  | -1.341631000 |
| H | -3.358002000 | 3.163593000  | 0.040165000  |

|   |              |             |              |
|---|--------------|-------------|--------------|
| C | 1.425322000  | 2.929492000 | -0.487105000 |
| C | 3.714618000  | 3.770231000 | -0.258054000 |
| C | 2.850934000  | 2.782392000 | -0.760991000 |
| C | 5.082857000  | 3.706759000 | -0.466806000 |
| C | 3.416540000  | 1.746236000 | -1.520793000 |
| C | 4.785510000  | 1.692514000 | -1.742867000 |
| C | 5.625737000  | 2.663760000 | -1.210242000 |
| H | 5.725658000  | 4.475552000 | -0.059281000 |
| H | 2.784444000  | 0.998319000 | -1.973353000 |
| H | 5.197318000  | 0.891613000 | -2.342472000 |
| H | 6.692206000  | 2.616146000 | -1.384702000 |
| H | 1.113514000  | 3.937933000 | -0.237224000 |
| H | 3.295043000  | 4.591055000 | 0.309218000  |
| O | -1.123328000 | 3.726125000 | 0.120697000  |

### A33

|   |              |              |              |
|---|--------------|--------------|--------------|
| C | -0.829370000 | -2.760436000 | -0.154148000 |
| C | 0.569285000  | -2.294702000 | 0.106159000  |
| H | 1.509924000  | 3.165974000  | 5.066623000  |
| C | 1.762260000  | 1.949331000  | 1.909365000  |
| C | 2.151279000  | 2.381496000  | 3.171584000  |
| C | 1.204042000  | 2.829046000  | 4.085195000  |
| C | -0.137651000 | 2.849285000  | 3.725519000  |
| C | -0.524884000 | 2.419400000  | 2.462100000  |
| C | 0.415082000  | 1.958327000  | 1.538293000  |

|   |              |              |              |
|---|--------------|--------------|--------------|
| H | 2.511193000  | 1.623889000  | 1.200073000  |
| H | 3.199756000  | 2.373817000  | 3.438956000  |
| H | -0.883148000 | 3.204428000  | 4.424648000  |
| H | -1.572052000 | 2.450639000  | 2.188051000  |
| N | -0.298035000 | 0.001842000  | 0.060384000  |
| C | 0.806763000  | -0.855025000 | 0.492253000  |
| C | -1.938019000 | -1.791564000 | 0.130281000  |
| C | -1.547446000 | -0.442671000 | 0.674877000  |
| C | -3.194303000 | -2.223140000 | -0.060287000 |
| C | -0.065492000 | 1.452879000  | 0.183649000  |
| P | 0.959016000  | 1.999314000  | -1.250992000 |
| O | 0.021093000  | 1.779115000  | -2.535129000 |
| O | 0.896688000  | 3.585758000  | -1.041273000 |
| C | 0.302785000  | 0.784824000  | -3.554275000 |
| C | -0.897890000 | -0.117325000 | -3.735597000 |
| C | 1.652097000  | 4.473444000  | -1.899006000 |
| C | 1.645601000  | 5.851683000  | -1.276646000 |
| H | 0.522090000  | 1.336652000  | -4.469166000 |
| H | 1.193795000  | 0.227219000  | -3.270759000 |
| H | 2.666293000  | 4.085625000  | -2.000410000 |
| H | 1.182140000  | 4.482304000  | -2.884448000 |
| H | 2.198954000  | 6.546138000  | -1.910626000 |
| H | 0.626803000  | 6.222794000  | -1.166949000 |
| H | 2.114285000  | 5.832968000  | -0.293291000 |
| H | -1.780348000 | 0.460417000  | -4.011774000 |

|   |              |              |              |
|---|--------------|--------------|--------------|
| H | -0.699345000 | -0.838320000 | -4.530546000 |
| H | -1.110219000 | -0.665195000 | -2.819066000 |
| H | 1.723423000  | -0.500803000 | 0.024654000  |
| H | -2.322319000 | 0.290868000  | 0.480242000  |
| O | 2.311516000  | 1.402315000  | -1.377521000 |
| H | 0.946385000  | -0.781990000 | 1.584118000  |
| H | -1.449813000 | -0.511006000 | 1.772995000  |
| H | -1.028715000 | 1.924123000  | -0.017553000 |
| C | -4.701818000 | -0.223692000 | -0.386144000 |
| C | -6.753327000 | -1.548581000 | 0.935088000  |
| C | -6.963115000 | -0.263254000 | 0.448169000  |
| C | -5.935972000 | 0.390974000  | -0.222548000 |
| H | -3.925955000 | 0.282845000  | -0.943004000 |
| H | -7.550390000 | -2.072383000 | 1.445802000  |
| H | -7.922876000 | 0.218668000  | 0.577135000  |
| H | -6.098729000 | 1.380440000  | -0.629087000 |
| C | -4.468252000 | -1.510582000 | 0.114880000  |
| C | -5.525326000 | -2.169416000 | 0.756754000  |
| H | -5.372329000 | -3.175452000 | 1.125858000  |
| H | -3.277692000 | -3.263756000 | -0.357848000 |
| C | 1.536241000  | -3.224174000 | -0.032488000 |
| C | 3.754430000  | -4.166878000 | -0.441972000 |
| C | 2.980181000  | -3.158343000 | 0.157761000  |
| C | 5.134354000  | -4.185371000 | -0.323447000 |
| C | 3.651610000  | -2.186017000 | 0.916711000  |

|   |              |              |              |
|---|--------------|--------------|--------------|
| C | 5.032684000  | -2.212960000 | 1.045084000  |
| C | 5.781111000  | -3.204108000 | 0.420667000  |
| H | 5.705799000  | -4.967905000 | -0.804545000 |
| H | 3.097024000  | -1.420678000 | 1.434907000  |
| H | 5.527151000  | -1.456312000 | 1.639494000  |
| H | 6.858118000  | -3.217416000 | 0.521037000  |
| H | 1.172649000  | -4.189581000 | -0.367402000 |
| H | 3.253906000  | -4.937730000 | -1.013652000 |
| O | -1.066347000 | -3.883262000 | -0.573484000 |

#### A34

|   |              |              |              |
|---|--------------|--------------|--------------|
| C | -0.383289000 | -2.715582000 | 0.409809000  |
| C | 0.925699000  | -2.135439000 | -0.030421000 |
| H | -4.581600000 | 4.205954000  | 0.807020000  |
| C | -2.086081000 | 3.009162000  | -1.148967000 |
| C | -3.214518000 | 3.730756000  | -0.780131000 |
| C | -3.704612000 | 3.642874000  | 0.516842000  |
| C | -3.057467000 | 2.830106000  | 1.441399000  |
| C | -1.927984000 | 2.111500000  | 1.071935000  |
| C | -1.432145000 | 2.191401000  | -0.230479000 |
| H | -1.703317000 | 3.091026000  | -2.157712000 |
| H | -3.707822000 | 4.363009000  | -1.506152000 |
| H | -3.428881000 | 2.759614000  | 2.455155000  |
| H | -1.428432000 | 1.481426000  | 1.793684000  |
| N | -0.219018000 | 0.022723000  | -0.222341000 |



|   |              |              |              |
|---|--------------|--------------|--------------|
| C | 0.933222000  | -0.766582000 | -0.662452000 |
| C | -1.617655000 | -1.976497000 | 0.003832000  |
| C | -1.432968000 | -0.656216000 | -0.697984000 |
| C | -2.790623000 | -2.598226000 | 0.219690000  |
| C | -0.177894000 | 1.432950000  | -0.642337000 |
| P | 1.237096000  | 2.470993000  | 0.002908000  |
| O | 1.357137000  | 2.234696000  | 1.582632000  |
| O | 2.557789000  | 1.810281000  | -0.651616000 |
| C | 1.879016000  | 1.060172000  | 2.247216000  |
| C | 2.150945000  | 1.422042000  | 3.690916000  |
| C | 3.745110000  | 2.626178000  | -0.860496000 |
| C | 3.819583000  | 3.105676000  | -2.294218000 |
| H | 1.143397000  | 0.260227000  | 2.169901000  |
| H | 2.792679000  | 0.741606000  | 1.744102000  |
| H | 3.732324000  | 3.468909000  | -0.170382000 |
| H | 4.584225000  | 1.978728000  | -0.608963000 |
| H | 4.745075000  | 3.663849000  | -2.448140000 |
| H | 3.808859000  | 2.263840000  | -2.987067000 |
| H | 2.980088000  | 3.761483000  | -2.518620000 |
| H | 1.237838000  | 1.750805000  | 4.186149000  |
| H | 2.536307000  | 0.550304000  | 4.221932000  |
| H | 2.886382000  | 2.223196000  | 3.759389000  |
| H | 0.932633000  | -0.849787000 | -1.766253000 |
| H | -1.368024000 | -0.825738000 | -1.789459000 |
| O | 1.062859000  | 3.900477000  | -0.316940000 |

|   |              |              |              |
|---|--------------|--------------|--------------|
| H | 1.851860000  | -0.255940000 | -0.398613000 |
| H | -2.286978000 | -0.015037000 | -0.540994000 |
| H | -0.074079000 | 1.520569000  | -1.736562000 |
| C | -5.066704000 | -3.199343000 | -0.476735000 |
| C | -5.989195000 | -0.599774000 | -0.233510000 |
| C | -6.854362000 | -1.600268000 | -0.662378000 |
| C | -6.387578000 | -2.904612000 | -0.779517000 |
| H | -4.712170000 | -4.219077000 | -0.555859000 |
| H | -6.348235000 | 0.413638000  | -0.113998000 |
| H | -7.886212000 | -1.367968000 | -0.889238000 |
| H | -7.055220000 | -3.694565000 | -1.096835000 |
| C | -4.169246000 | -2.196243000 | -0.079991000 |
| C | -4.662731000 | -0.890860000 | 0.052203000  |
| H | -4.024407000 | -0.100816000 | 0.418504000  |
| H | -2.692806000 | -3.591573000 | 0.645959000  |
| C | 2.018956000  | -2.888238000 | 0.197500000  |
| C | 3.895307000  | -1.820840000 | -1.136544000 |
| C | 3.426716000  | -2.659872000 | -0.113234000 |
| C | 5.255870000  | -1.673576000 | -1.368733000 |
| C | 4.380523000  | -3.358807000 | 0.646199000  |
| C | 5.738691000  | -3.198906000 | 0.423730000  |
| C | 6.183438000  | -2.351973000 | -0.586198000 |
| H | 5.592962000  | -1.032506000 | -2.172532000 |
| H | 4.038656000  | -4.029037000 | 1.424324000  |
| H | 6.450984000  | -3.742068000 | 1.030275000  |

|   |              |              |              |
|---|--------------|--------------|--------------|
| H | 7.242606000  | -2.232676000 | -0.770596000 |
| H | 1.816190000  | -3.812717000 | 0.727636000  |
| H | 3.198649000  | -1.305034000 | -1.778437000 |
| O | -0.438411000 | -3.754626000 | 1.050107000  |

### A35

|   |              |              |              |
|---|--------------|--------------|--------------|
| C | -0.091864000 | -3.008185000 | 0.263031000  |
| C | 1.177401000  | -2.291686000 | -0.070519000 |
| H | -4.564521000 | 3.595199000  | 1.569945000  |
| C | -1.728558000 | 1.742965000  | 1.384475000  |
| C | -2.844430000 | 2.358784000  | 1.936164000  |
| C | -3.695871000 | 3.116257000  | 1.138021000  |
| C | -3.426237000 | 3.248969000  | -0.218391000 |
| C | -2.309197000 | 2.631354000  | -0.769122000 |
| C | -1.447342000 | 1.877401000  | 0.024225000  |
| H | -1.070316000 | 1.147794000  | 2.000152000  |
| H | -3.050052000 | 2.246821000  | 2.992571000  |
| H | -4.087017000 | 3.827452000  | -0.850317000 |
| H | -2.109010000 | 2.733941000  | -1.828141000 |
| N | -0.137409000 | -0.200517000 | -0.182681000 |
| C | 1.128568000  | -0.852235000 | -0.513988000 |
| C | -1.369144000 | -2.306501000 | -0.076672000 |
| C | -1.245165000 | -0.971118000 | -0.757843000 |
| C | -2.514219000 | -2.959470000 | 0.179888000  |
| C | -0.224155000 | 1.209396000  | -0.583448000 |

|   |              |              |              |
|---|--------------|--------------|--------------|
| P | 1.314257000  | 2.198663000  | -0.248194000 |
| O | 0.822896000  | 3.713715000  | -0.457342000 |
| O | 1.485141000  | 2.033414000  | 1.333984000  |
| C | 1.499446000  | 4.642568000  | -1.341051000 |
| C | 0.534276000  | 5.155916000  | -2.388226000 |
| C | 2.616585000  | 2.620506000  | 2.022762000  |
| C | 2.690117000  | 2.023243000  | 3.409874000  |
| H | 1.860001000  | 5.456163000  | -0.710884000 |
| H | 2.354771000  | 4.142712000  | -1.792581000 |
| H | 2.466884000  | 3.701181000  | 2.065996000  |
| H | 3.521684000  | 2.414394000  | 1.450532000  |
| H | 2.837177000  | 0.945028000  | 3.359238000  |
| H | 3.527940000  | 2.460476000  | 3.955001000  |
| H | 1.775307000  | 2.223053000  | 3.967177000  |
| H | -0.341978000 | 5.607028000  | -1.923504000 |
| H | 1.027166000  | 5.912169000  | -3.001725000 |
| H | 0.204226000  | 4.350491000  | -3.044628000 |
| H | 1.325407000  | -0.789539000 | -1.599594000 |
| H | -1.075702000 | -1.127874000 | -1.840601000 |
| O | 2.508263000  | 1.863084000  | -1.063499000 |
| H | 1.935609000  | -0.313791000 | -0.026620000 |
| H | -2.162107000 | -0.402798000 | -0.670780000 |
| H | -0.294935000 | 1.302994000  | -1.682371000 |
| C | -4.402849000 | -1.277688000 | 0.255538000  |
| C | -6.147947000 | -3.207383000 | -0.719571000 |

|   |              |              |              |
|---|--------------|--------------|--------------|
| C | -6.616999000 | -1.927489000 | -0.445093000 |
| C | -5.741334000 | -0.969669000 | 0.053704000  |
| H | -3.748705000 | -0.529460000 | 0.679090000  |
| H | -6.823642000 | -3.965093000 | -1.093631000 |
| H | -7.658689000 | -1.683070000 | -0.604516000 |
| H | -6.100844000 | 0.021737000  | 0.294943000  |
| C | -3.909594000 | -2.556344000 | -0.035347000 |
| C | -4.814185000 | -3.520684000 | -0.502186000 |
| H | -4.457048000 | -4.522412000 | -0.704418000 |
| H | -2.379474000 | -3.961926000 | 0.574134000  |
| C | 2.313321000  | -3.010240000 | 0.047171000  |
| C | 4.195287000  | -1.521173000 | -0.822117000 |
| C | 3.714087000  | -2.682791000 | -0.191011000 |
| C | 5.558362000  | -1.317585000 | -0.986351000 |
| C | 4.663053000  | -3.626304000 | 0.244935000  |
| C | 6.022441000  | -3.417713000 | 0.083573000  |
| C | 6.477469000  | -2.257074000 | -0.533485000 |
| H | 5.900670000  | -0.415428000 | -1.475356000 |
| H | 4.313130000  | -4.532688000 | 0.721946000  |
| H | 6.726772000  | -4.160187000 | 0.434497000  |
| H | 7.538127000  | -2.089496000 | -0.665578000 |
| H | 2.151735000  | -4.021161000 | 0.404883000  |
| H | 3.523488000  | -0.768724000 | -1.200312000 |
| O | -0.089547000 | -4.117397000 | 0.776044000  |

A36

|   |              |              |              |
|---|--------------|--------------|--------------|
| C | -0.298316000 | -3.008319000 | 0.316420000  |
| C | 1.009952000  | -2.378994000 | -0.042194000 |
| H | -4.338853000 | 3.890407000  | 1.493972000  |
| C | -2.175074000 | 2.732796000  | -0.843297000 |
| C | -3.242566000 | 3.435585000  | -0.296116000 |
| C | -3.508313000 | 3.346185000  | 1.064501000  |
| C | -2.702745000 | 2.547533000  | 1.870286000  |
| C | -1.635566000 | 1.847823000  | 1.322417000  |
| C | -1.358541000 | 1.937132000  | -0.042346000 |
| H | -1.980763000 | 2.798299000  | -1.906856000 |
| H | -3.868544000 | 4.045471000  | -0.933929000 |
| H | -2.906234000 | 2.469501000  | 2.930153000  |
| H | -1.012937000 | 1.221828000  | 1.944709000  |
| N | -0.179210000 | -0.221463000 | -0.215962000 |
| C | 1.042353000  | -0.956158000 | -0.538350000 |
| C | -1.534047000 | -2.246311000 | -0.047188000 |
| C | -1.335359000 | -0.938787000 | -0.763377000 |
| C | -2.714029000 | -2.828994000 | 0.220674000  |
| C | -0.187180000 | 1.181625000  | -0.647601000 |
| P | 1.413231000  | 2.086488000  | -0.359859000 |
| O | 1.039145000  | 3.640116000  | -0.529346000 |
| O | 1.617193000  | 1.939881000  | 1.216701000  |
| C | 1.379942000  | 4.395724000  | -1.716837000 |
| C | 1.888506000  | 5.759809000  | -1.303405000 |

|   |              |              |              |
|---|--------------|--------------|--------------|
| C | 2.798190000  | 2.475548000  | 1.865933000  |
| C | 2.801834000  | 2.003656000  | 3.302099000  |
| H | 2.127487000  | 3.844400000  | -2.285409000 |
| H | 0.472473000  | 4.484936000  | -2.316685000 |
| H | 2.757470000  | 3.564368000  | 1.806286000  |
| H | 3.680272000  | 2.127931000  | 1.327452000  |
| H | 2.835595000  | 0.915910000  | 3.352640000  |
| H | 3.678387000  | 2.399886000  | 3.816810000  |
| H | 1.910539000  | 2.348239000  | 3.825726000  |
| H | 2.810433000  | 5.673047000  | -0.728571000 |
| H | 2.094181000  | 6.361004000  | -2.190633000 |
| H | 1.148884000  | 6.282854000  | -0.697596000 |
| H | 1.228353000  | -0.943529000 | -1.627490000 |
| H | -1.185192000 | -1.132226000 | -1.843060000 |
| O | 2.545500000  | 1.666035000  | -1.221153000 |
| H | 1.886133000  | -0.450041000 | -0.079402000 |
| H | -2.215270000 | -0.313881000 | -0.684064000 |
| H | -0.269063000 | 1.253474000  | -1.747980000 |
| C | -5.037260000 | -3.293290000 | -0.449943000 |
| C | -5.833775000 | -0.679675000 | 0.006149000  |
| C | -6.756038000 | -1.609334000 | -0.461010000 |
| C | -6.352506000 | -2.920861000 | -0.685576000 |
| H | -4.731294000 | -4.318777000 | -0.613204000 |
| H | -6.143199000 | 0.336976000  | 0.208815000  |
| H | -7.783258000 | -1.317799000 | -0.634499000 |

|   |              |              |              |
|---|--------------|--------------|--------------|
| H | -7.064886000 | -3.656497000 | -1.034760000 |
| C | -4.085448000 | -2.360086000 | -0.014496000 |
| C | -4.513382000 | -1.047645000 | 0.225885000  |
| H | -3.823468000 | -0.317830000 | 0.624169000  |
| H | -2.635101000 | -3.826152000 | 0.642453000  |
| C | 2.103274000  | -3.155332000 | 0.105323000  |
| C | 4.062364000  | -1.818045000 | -0.835713000 |
| C | 3.520064000  | -2.915135000 | -0.142058000 |
| C | 5.434567000  | -1.695220000 | -1.004577000 |
| C | 4.417396000  | -3.880215000 | 0.351745000  |
| C | 5.786207000  | -3.751447000 | 0.186629000  |
| C | 6.302499000  | -2.653428000 | -0.493523000 |
| H | 5.824497000  | -0.841813000 | -1.542957000 |
| H | 4.019826000  | -4.738964000 | 0.877145000  |
| H | 6.450107000  | -4.508023000 | 0.583289000  |
| H | 7.370721000  | -2.548992000 | -0.629498000 |
| H | 1.885386000  | -4.140595000 | 0.502570000  |
| H | 3.430422000  | -1.055265000 | -1.259927000 |
| O | -0.359228000 | -4.097540000 | 0.867203000  |

A37

|   |              |              |             |
|---|--------------|--------------|-------------|
| C | 0.357294000  | 2.818843000  | 0.389146000 |
| C | -0.958853000 | 2.171116000  | 0.083868000 |
| H | 4.410693000  | -3.962919000 | 1.769030000 |
| C | 1.765151000  | -1.867606000 | 1.431194000 |



|   |              |              |              |
|---|--------------|--------------|--------------|
| C | 2.822208000  | -2.539240000 | 2.032302000  |
| C | 3.588623000  | -3.439281000 | 1.299422000  |
| C | 3.291892000  | -3.662259000 | -0.039743000 |
| C | 2.235147000  | -2.989344000 | -0.640545000 |
| C | 1.463450000  | -2.086261000 | 0.086829000  |
| H | 1.170844000  | -1.162444000 | 1.994171000  |
| H | 3.046781000  | -2.360027000 | 3.075506000  |
| H | 3.881701000  | -4.360727000 | -0.618228000 |
| H | 2.003195000  | -3.175558000 | -1.681072000 |
| N | 0.247857000  | 0.040805000  | -0.165057000 |
| C | -0.987676000 | 0.761119000  | -0.454424000 |
| C | 1.588044000  | 2.080471000  | -0.030006000 |
| C | 1.383024000  | 0.770278000  | -0.739217000 |
| C | 2.768534000  | 2.682172000  | 0.191486000  |
| C | 0.289794000  | -1.368039000 | -0.568065000 |
| P | -1.221281000 | -2.406191000 | -0.269196000 |
| O | -1.665488000 | -1.960473000 | 1.200306000  |
| O | -2.386252000 | -1.816751000 | -1.224141000 |
| C | -2.686942000 | -2.697789000 | 1.920138000  |
| C | -2.621276000 | -2.297700000 | 3.376573000  |
| C | -2.975813000 | -2.607352000 | -2.288304000 |
| C | -2.461798000 | -2.163149000 | -3.642278000 |
| H | -3.656544000 | -2.449276000 | 1.484607000  |
| H | -2.505117000 | -3.764369000 | 1.788132000  |
| H | -2.758443000 | -3.658164000 | -2.107261000 |

|   |              |              |              |
|---|--------------|--------------|--------------|
| H | -4.050819000 | -2.448681000 | -2.206081000 |
| H | -2.972706000 | -2.720234000 | -4.429666000 |
| H | -2.642631000 | -1.100391000 | -3.803789000 |
| H | -1.392460000 | -2.353140000 | -3.737035000 |
| H | -2.782409000 | -1.226479000 | 3.493624000  |
| H | -3.393581000 | -2.825836000 | 3.937848000  |
| H | -1.651460000 | -2.552004000 | 3.802769000  |
| H | -1.184540000 | 0.782150000  | -1.542549000 |
| H | 1.205705000  | 0.960238000  | -1.815456000 |
| O | -0.990278000 | -3.851103000 | -0.487179000 |
| H | -1.817070000 | 0.233849000  | 0.005600000  |
| H | 2.270023000  | 0.153269000  | -0.680495000 |
| H | 0.402223000  | -1.464635000 | -1.662688000 |
| C | 4.593409000  | 0.929316000  | 0.127394000  |
| C | 6.366807000  | 2.829226000  | -0.856517000 |
| C | 6.798668000  | 1.524329000  | -0.646488000 |
| C | 5.909806000  | 0.581304000  | -0.142816000 |
| H | 3.931715000  | 0.189692000  | 0.554342000  |
| H | 7.053936000  | 3.575071000  | -1.233527000 |
| H | 7.822744000  | 1.248365000  | -0.859458000 |
| H | 6.242355000  | -0.430044000 | 0.049176000  |
| C | 4.136588000  | 2.234723000  | -0.097830000 |
| C | 5.056148000  | 3.182100000  | -0.570427000 |
| H | 4.728629000  | 4.202701000  | -0.722187000 |
| H | 2.690898000  | 3.677080000  | 0.618701000  |

|   |              |             |              |
|---|--------------|-------------|--------------|
| C | -2.053218000 | 2.919333000 | 0.329328000  |
| C | -4.034301000 | 1.623917000 | -0.610863000 |
| C | -3.478084000 | 2.658223000 | 0.161022000  |
| C | -5.410178000 | 1.467253000 | -0.703376000 |
| C | -4.366728000 | 3.532252000 | 0.812619000  |
| C | -5.739388000 | 3.368375000 | 0.726656000  |
| C | -6.269074000 | 2.330395000 | -0.032663000 |
| H | -5.814239000 | 0.667033000 | -1.309304000 |
| H | -3.959868000 | 4.346627000 | 1.398030000  |
| H | -6.396754000 | 4.052974000 | 1.245835000  |
| H | -7.340426000 | 2.201223000 | -0.108385000 |
| H | -1.828209000 | 3.891116000 | 0.754961000  |
| H | -3.400948000 | 0.947168000 | -1.160386000 |
| O | 0.422451000  | 3.904983000 | 0.945024000  |

### A38

|   |              |              |              |
|---|--------------|--------------|--------------|
| C | -0.597675000 | -3.085286000 | -0.100959000 |
| C | 0.761563000  | -2.461752000 | -0.083813000 |
| H | -3.859324000 | 3.825647000  | 2.547527000  |
| C | -2.103939000 | 2.794596000  | -0.161824000 |
| C | -3.066934000 | 3.466626000  | 0.584608000  |
| C | -3.112560000 | 3.304794000  | 1.963192000  |
| C | -2.195576000 | 2.464845000  | 2.588802000  |
| C | -1.236344000 | 1.793748000  | 1.843092000  |
| C | -1.178185000 | 1.957887000  | 0.457793000  |

|   |              |              |              |
|---|--------------|--------------|--------------|
| H | -2.084439000 | 2.909900000  | -1.238797000 |
| H | -3.783051000 | 4.107375000  | 0.087388000  |
| H | -2.226494000 | 2.334131000  | 3.662281000  |
| H | -0.524650000 | 1.139477000  | 2.326494000  |
| N | -0.230197000 | -0.226050000 | -0.133778000 |
| C | 0.892999000  | -1.046558000 | -0.589030000 |
| C | -1.757277000 | -2.160080000 | -0.321397000 |
| C | -1.467757000 | -0.736937000 | -0.727441000 |
| C | -2.984105000 | -2.693716000 | -0.203303000 |
| C | -0.123416000 | 1.223332000  | -0.355538000 |
| P | 1.553027000  | 1.915942000  | 0.060755000  |
| O | 2.335992000  | 1.676397000  | -1.329929000 |
| O | 1.381462000  | 3.506135000  | 0.167612000  |
| C | 3.783069000  | 1.775416000  | -1.386459000 |
| C | 4.242707000  | 1.234345000  | -2.721439000 |
| C | 1.076649000  | 4.401874000  | -0.922489000 |
| C | 1.674454000  | 5.756792000  | -0.608971000 |
| H | 4.066580000  | 2.823143000  | -1.266183000 |
| H | 4.204949000  | 1.209628000  | -0.556714000 |
| H | 1.479565000  | 3.995675000  | -1.851221000 |
| H | -0.007976000 | 4.469273000  | -1.013666000 |
| H | 1.429728000  | 6.462393000  | -1.404551000 |
| H | 1.277577000  | 6.143149000  | 0.329062000  |
| H | 2.759033000  | 5.694546000  | -0.523465000 |
| H | 3.800710000  | 1.795636000  | -3.544716000 |

|   |              |              |              |
|---|--------------|--------------|--------------|
| H | 5.328215000  | 1.313534000  | -2.795494000 |
| H | 3.968293000  | 0.185697000  | -2.829453000 |
| H | 0.937819000  | -1.067983000 | -1.694262000 |
| H | -1.395788000 | -0.697587000 | -1.832632000 |
| O | 2.205130000  | 1.378101000  | 1.272176000  |
| H | 1.822783000  | -0.618074000 | -0.244719000 |
| H | -2.287256000 | -0.084875000 | -0.452396000 |
| H | -0.265448000 | 1.478689000  | -1.419763000 |
| C | -4.637796000 | -0.842859000 | 0.275114000  |
| C | -6.589939000 | -2.228603000 | -1.134500000 |
| C | -6.896246000 | -1.002595000 | -0.554414000 |
| C | -5.918332000 | -0.319291000 | 0.159551000  |
| H | -3.902795000 | -0.314760000 | 0.865373000  |
| H | -7.347461000 | -2.776197000 | -1.679365000 |
| H | -7.892377000 | -0.590616000 | -0.645070000 |
| H | -6.153355000 | 0.622512000  | 0.637144000  |
| C | -4.307721000 | -2.067484000 | -0.319354000 |
| C | -5.315308000 | -2.760682000 | -1.004501000 |
| H | -5.086240000 | -3.722701000 | -1.444870000 |
| H | -2.993570000 | -3.764593000 | -0.025812000 |
| C | 1.773684000  | -3.234110000 | 0.346574000  |
| C | 4.134689000  | -3.919504000 | 0.225366000  |
| C | 3.195260000  | -2.929441000 | 0.548831000  |
| C | 5.492988000  | -3.706868000 | 0.409215000  |
| C | 3.660782000  | -1.733570000 | 1.113180000  |

|   |              |              |              |
|---|--------------|--------------|--------------|
| C | 5.020303000  | -1.531550000 | 1.313470000  |
| C | 5.942127000  | -2.508415000 | 0.953384000  |
| H | 6.199576000  | -4.480858000 | 0.140164000  |
| H | 2.968847000  | -0.965876000 | 1.428819000  |
| H | 5.354763000  | -0.607719000 | 1.766657000  |
| H | 6.999908000  | -2.344780000 | 1.111376000  |
| H | 1.492398000  | -4.261282000 | 0.557221000  |
| H | 3.788601000  | -4.860926000 | -0.182176000 |
| O | -0.763348000 | -4.277895000 | 0.101451000  |

#### A39

|   |              |              |              |
|---|--------------|--------------|--------------|
| C | 0.696850000  | -2.732442000 | -0.479520000 |
| C | -0.674044000 | -2.205443000 | -0.189829000 |
| H | 3.671115000  | 4.530697000  | -2.062566000 |
| C | 1.437403000  | 2.047803000  | -1.472788000 |
| C | 2.321328000  | 2.862460000  | -2.170143000 |
| C | 2.980637000  | 3.898950000  | -1.519849000 |
| C | 2.751627000  | 4.115099000  | -0.165949000 |
| C | 1.868670000  | 3.300501000  | 0.530526000  |
| C | 1.203915000  | 2.259016000  | -0.114124000 |
| H | 0.940318000  | 1.226567000  | -1.968989000 |
| H | 2.498792000  | 2.682727000  | -3.222339000 |
| H | 3.260450000  | 4.918687000  | 0.349570000  |
| H | 1.683951000  | 3.483733000  | 1.580853000  |
| N | 0.306977000  | -0.012918000 | 0.210637000  |

|   |              |              |              |
|---|--------------|--------------|--------------|
| C | -0.779020000 | -0.916731000 | 0.587055000  |
| C | 1.852993000  | -1.928832000 | 0.026768000  |
| C | 1.582452000  | -0.584516000 | 0.648335000  |
| C | 3.075239000  | -2.474241000 | -0.129565000 |
| C | 0.219392000  | 1.382705000  | 0.653068000  |
| P | -1.428836000 | 2.234752000  | 0.569219000  |
| O | -2.115678000 | 1.776268000  | -0.812954000 |
| O | -2.257520000 | 1.465041000  | 1.711321000  |
| C | -2.602796000 | 2.738208000  | -1.788743000 |
| C | -2.295298000 | 2.232364000  | -3.180208000 |
| C | -3.524023000 | 1.994650000  | 2.176754000  |
| C | -3.911350000 | 1.256028000  | 3.438097000  |
| H | -3.678520000 | 2.837734000  | -1.635426000 |
| H | -2.138390000 | 3.702477000  | -1.591893000 |
| H | -4.268821000 | 1.847161000  | 1.391716000  |
| H | -3.410213000 | 3.063876000  | 2.354312000  |
| H | -3.161892000 | 1.401482000  | 4.215675000  |
| H | -4.866542000 | 1.632858000  | 3.806906000  |
| H | -4.013405000 | 0.187948000  | 3.248711000  |
| H | -2.744622000 | 1.254587000  | -3.353113000 |
| H | -2.698407000 | 2.928880000  | -3.917434000 |
| H | -1.220388000 | 2.153175000  | -3.336667000 |
| H | -0.749553000 | -1.141624000 | 1.669240000  |
| H | 1.592609000  | -0.665361000 | 1.752877000  |
| O | -1.351896000 | 3.700520000  | 0.751427000  |

|   |              |              |              |
|---|--------------|--------------|--------------|
| H | -1.731074000 | -0.444530000 | 0.404671000  |
| H | 2.381992000  | 0.102177000  | 0.377538000  |
| H | 0.453652000  | 1.474341000  | 1.727535000  |
| C | 5.502577000  | -2.567058000 | -0.417657000 |
| C | 5.964904000  | -0.655085000 | 1.530982000  |
| C | 7.036845000  | -1.209717000 | 0.841250000  |
| C | 6.799818000  | -2.171909000 | -0.134979000 |
| H | 5.323031000  | -3.322997000 | -1.171194000 |
| H | 6.142197000  | 0.079651000  | 2.305059000  |
| H | 8.048591000  | -0.902837000 | 1.069966000  |
| H | 7.627247000  | -2.618683000 | -0.669830000 |
| C | 4.401902000  | -1.999227000 | 0.247129000  |
| C | 4.664163000  | -1.040913000 | 1.239760000  |
| H | 3.855874000  | -0.615615000 | 1.812915000  |
| H | 3.069215000  | -3.424172000 | -0.653050000 |
| C | -1.706036000 | -2.971184000 | -0.582720000 |
| C | -3.952905000 | -3.890122000 | -0.187242000 |
| C | -3.155194000 | -2.770262000 | -0.464240000 |
| C | -5.331257000 | -3.781832000 | -0.076742000 |
| C | -3.796629000 | -1.542215000 | -0.675408000 |
| C | -5.178147000 | -1.439287000 | -0.583290000 |
| C | -5.950974000 | -2.552858000 | -0.272806000 |
| H | -5.922773000 | -4.658812000 | 0.150257000  |
| H | -3.220312000 | -0.670505000 | -0.948304000 |
| H | -5.655016000 | -0.485134000 | -0.765903000 |



|   |              |              |              |
|---|--------------|--------------|--------------|
| H | -7.026875000 | -2.466863000 | -0.200204000 |
| H | -1.413886000 | -3.915511000 | -1.031209000 |
| H | -3.477113000 | -4.852766000 | -0.050250000 |
| O | 0.864373000  | -3.776538000 | -1.091757000 |

#### A40

|   |              |              |              |
|---|--------------|--------------|--------------|
| C | 0.079963000  | -2.886267000 | 0.393258000  |
| C | 1.319495000  | -2.165930000 | -0.030465000 |
| H | -4.874362000 | 3.531286000  | 0.753892000  |
| C | -1.973790000 | 1.797707000  | 1.053073000  |
| C | -3.180159000 | 2.384291000  | 1.413367000  |
| C | -3.935859000 | 3.073686000  | 0.470626000  |
| C | -3.477876000 | 3.167954000  | -0.837878000 |
| C | -2.271684000 | 2.578849000  | -1.197150000 |
| C | -1.505163000 | 1.891019000  | -0.258378000 |
| H | -1.390095000 | 1.260464000  | 1.785751000  |
| H | -3.530009000 | 2.304101000  | 2.434137000  |
| H | -4.060022000 | 3.696229000  | -1.581217000 |
| H | -1.920282000 | 2.657489000  | -2.217927000 |
| N | -0.066008000 | -0.126209000 | -0.204820000 |
| C | 1.213690000  | -0.753693000 | -0.543224000 |
| C | -1.223158000 | -2.266439000 | -0.003218000 |
| C | -1.148574000 | -0.959672000 | -0.746012000 |
| C | -2.335441000 | -2.973296000 | 0.259704000  |
| C | -0.180472000 | 1.266456000  | -0.664748000 |

|   |              |              |              |
|---|--------------|--------------|--------------|
| P | 1.234762000  | 2.342715000  | -0.097958000 |
| O | 0.684331000  | 3.762277000  | -0.587035000 |
| O | 1.142676000  | 2.419936000  | 1.502752000  |
| C | 1.527249000  | 4.937023000  | -0.504532000 |
| C | 0.841344000  | 6.063191000  | -1.244564000 |
| C | 2.198088000  | 1.952566000  | 2.382763000  |
| C | 1.667261000  | 0.877311000  | 3.306379000  |
| H | 1.666847000  | 5.186484000  | 0.549146000  |
| H | 2.499186000  | 4.703066000  | -0.939614000 |
| H | 3.030574000  | 1.596511000  | 1.777951000  |
| H | 2.530935000  | 2.824555000  | 2.946374000  |
| H | 2.459029000  | 0.555520000  | 3.985082000  |
| H | 0.837037000  | 1.252647000  | 3.904703000  |
| H | 1.324154000  | 0.009540000  | 2.744160000  |
| H | -0.134760000 | 6.275297000  | -0.809501000 |
| H | 1.449852000  | 6.966843000  | -1.185925000 |
| H | 0.704942000  | 5.808615000  | -2.295301000 |
| H | 1.366427000  | -0.739950000 | -1.639093000 |
| H | -0.971711000 | -1.156898000 | -1.820403000 |
| O | 2.584265000  | 1.990069000  | -0.606043000 |
| H | 2.019522000  | -0.161607000 | -0.123428000 |
| H | -2.084117000 | -0.422456000 | -0.684794000 |
| H | -0.096777000 | 1.327247000  | -1.763608000 |
| C | -4.569082000 | -3.783777000 | -0.355389000 |
| C | -5.700970000 | -1.264106000 | -0.169204000 |

|   |              |              |              |
|---|--------------|--------------|--------------|
| C | -6.489613000 | -2.347241000 | -0.540983000 |
| C | -5.917462000 | -3.611332000 | -0.629550000 |
| H | -4.131648000 | -4.772339000 | -0.412278000 |
| H | -6.140921000 | -0.280573000 | -0.071946000 |
| H | -7.542960000 | -2.209713000 | -0.745338000 |
| H | -6.523880000 | -4.464816000 | -0.902263000 |
| C | -3.749692000 | -2.696676000 | -0.015525000 |
| C | -4.347784000 | -1.433424000 | 0.089121000  |
| H | -3.768368000 | -0.581987000 | 0.413537000  |
| H | -2.144751000 | -3.940723000 | 0.713598000  |
| C | 2.471216000  | -2.863271000 | 0.061696000  |
| C | 4.296175000  | -1.375471000 | -0.926536000 |
| C | 3.852908000  | -2.540447000 | -0.274261000 |
| C | 5.644607000  | -1.179494000 | -1.189091000 |
| C | 4.824823000  | -3.493373000 | 0.083828000  |
| C | 6.169887000  | -3.294225000 | -0.178370000 |
| C | 6.587071000  | -2.131407000 | -0.817432000 |
| H | 5.957666000  | -0.272890000 | -1.689258000 |
| H | 4.504630000  | -4.400863000 | 0.579242000  |
| H | 6.892290000  | -4.045188000 | 0.112545000  |
| H | 7.636144000  | -1.970345000 | -1.027062000 |
| H | 2.341584000  | -3.858570000 | 0.472331000  |
| H | 3.605163000  | -0.610547000 | -1.238084000 |
| O | 0.127143000  | -3.940626000 | 1.009559000  |

A41

|   |              |              |              |
|---|--------------|--------------|--------------|
| C | -0.740407000 | -2.998687000 | 0.075081000  |
| C | 0.648487000  | -2.453309000 | 0.002885000  |
| H | -3.616773000 | 4.012293000  | 2.729594000  |
| C | -1.968977000 | 2.919815000  | -0.022028000 |
| C | -2.882148000 | 3.632318000  | 0.748627000  |
| C | -2.906589000 | 3.462543000  | 2.126590000  |
| C | -2.017873000 | 2.575865000  | 2.727096000  |
| C | -1.108243000 | 1.864275000  | 1.957418000  |
| C | -1.072563000 | 2.034243000  | 0.572405000  |
| H | -1.965564000 | 3.042538000  | -1.098512000 |
| H | -3.577486000 | 4.309842000  | 0.270984000  |
| H | -2.033603000 | 2.437935000  | 3.799992000  |
| H | -0.420251000 | 1.172131000  | 2.422109000  |
| N | -0.245911000 | -0.189716000 | -0.060488000 |
| C | 0.819216000  | -1.063297000 | -0.554017000 |
| C | -1.856140000 | -2.057053000 | -0.262499000 |
| C | -1.529997000 | -0.627152000 | -0.608933000 |
| C | -3.101769000 | -2.566695000 | -0.203825000 |
| C | -0.074582000 | 1.254722000  | -0.270312000 |
| P | 1.643596000  | 1.861349000  | 0.109080000  |
| O | 2.375211000  | 1.611036000  | -1.308143000 |
| O | 1.552208000  | 3.455683000  | 0.247577000  |
| C | 3.822285000  | 1.666552000  | -1.405676000 |
| C | 4.225574000  | 1.138988000  | -2.764007000 |

|   |              |              |              |
|---|--------------|--------------|--------------|
| C | 1.259021000  | 4.385433000  | -0.816643000 |
| C | 1.912722000  | 5.710189000  | -0.486149000 |
| H | 4.142047000  | 2.702268000  | -1.272782000 |
| H | 4.249889000  | 1.070834000  | -0.600181000 |
| H | 0.176134000  | 4.494770000  | -0.884320000 |
| H | 1.628322000  | 3.985191000  | -1.761901000 |
| H | 1.679701000  | 6.441657000  | -1.261632000 |
| H | 1.547818000  | 6.090072000  | 0.467357000  |
| H | 2.995643000  | 5.606273000  | -0.422885000 |
| H | 3.778997000  | 1.731378000  | -3.562670000 |
| H | 5.310532000  | 1.184185000  | -2.868311000 |
| H | 3.913355000  | 0.102336000  | -2.884578000 |
| H | 1.782906000  | -0.668465000 | -0.267353000 |
| H | -1.527158000 | -0.499401000 | -1.709918000 |
| O | 2.305035000  | 1.272110000  | 1.291049000  |
| H | 0.808287000  | -1.111752000 | -1.659078000 |
| H | -2.312513000 | 0.021634000  | -0.220724000 |
| H | -0.229299000 | 1.527153000  | -1.328789000 |
| C | -5.525764000 | -2.570063000 | 0.135728000  |
| C | -5.908770000 | -0.342381000 | -1.463123000 |
| C | -6.999034000 | -0.940170000 | -0.841751000 |
| C | -6.801804000 | -2.060866000 | -0.041647000 |
| H | -5.378355000 | -3.448415000 | 0.750723000  |
| H | -6.056175000 | 0.516673000  | -2.104169000 |
| H | -7.994675000 | -0.543769000 | -0.989015000 |

|   |              |              |              |
|---|--------------|--------------|--------------|
| H | -7.644336000 | -2.541868000 | 0.437023000  |
| C | -4.405689000 | -1.963497000 | -0.458093000 |
| C | -4.628415000 | -0.843463000 | -1.274601000 |
| H | -3.805872000 | -0.379571000 | -1.795553000 |
| H | -3.138552000 | -3.600960000 | 0.121030000  |
| C | 1.641795000  | -3.268819000 | 0.394332000  |
| C | 3.949876000  | -4.080920000 | 0.118988000  |
| C | 3.088360000  | -3.038746000 | 0.491617000  |
| C | 5.326818000  | -3.939157000 | 0.207325000  |
| C | 3.652947000  | -1.863281000 | 1.005553000  |
| C | 5.031929000  | -1.732451000 | 1.110895000  |
| C | 5.874433000  | -2.760895000 | 0.703377000  |
| H | 5.971825000  | -4.752476000 | -0.098026000 |
| H | 3.024259000  | -1.057491000 | 1.357192000  |
| H | 5.445096000  | -0.823905000 | 1.528860000  |
| H | 6.947672000  | -2.652638000 | 0.787668000  |
| H | 1.318638000  | -4.270783000 | 0.659278000  |
| H | 3.527512000  | -5.006854000 | -0.250460000 |
| O | -0.961052000 | -4.154739000 | 0.403092000  |

A42

|   |              |              |              |
|---|--------------|--------------|--------------|
| C | 0.900824000  | -2.956550000 | -0.260878000 |
| C | -0.509989000 | -2.486068000 | -0.117321000 |
| H | 3.266685000  | 4.441174000  | -2.425526000 |
| C | 1.098954000  | 1.929567000  | -1.719296000 |

|   |              |              |              |
|---|--------------|--------------|--------------|
| C | 1.920922000  | 2.765874000  | -2.464123000 |
| C | 2.623394000  | 3.794078000  | -1.844309000 |
| C | 2.499797000  | 3.981247000  | -0.472538000 |
| C | 1.677621000  | 3.143629000  | 0.272507000  |
| C | 0.970500000  | 2.111510000  | -0.341719000 |
| H | 0.558240000  | 1.123958000  | -2.195174000 |
| H | 2.014262000  | 2.612738000  | -3.531066000 |
| H | 3.048125000  | 4.773588000  | 0.019606000  |
| H | 1.584597000  | 3.293232000  | 1.340930000  |
| N | 0.284791000  | -0.200926000 | 0.135461000  |
| C | -0.730942000 | -1.161713000 | 0.566649000  |
| C | 1.979839000  | -2.001710000 | 0.153336000  |
| C | 1.596483000  | -0.623336000 | 0.627220000  |
| C | 3.245112000  | -2.451775000 | 0.045867000  |
| C | 0.054849000  | 1.208282000  | 0.471313000  |
| P | -1.698691000 | 1.771385000  | 0.221994000  |
| O | -2.350094000 | 1.342095000  | 1.623577000  |
| O | -1.655176000 | 3.369416000  | 0.374275000  |
| C | -3.760285000 | 1.560188000  | 1.878226000  |
| C | -4.106365000 | 0.913965000  | 3.200665000  |
| C | -1.729611000 | 4.260294000  | -0.769850000 |
| C | -2.506837000 | 5.494962000  | -0.369692000 |
| H | -3.942739000 | 2.635756000  | 1.903608000  |
| H | -4.335334000 | 1.126931000  | 1.059444000  |
| H | -0.709089000 | 4.511746000  | -1.057904000 |

|   |              |              |              |
|---|--------------|--------------|--------------|
| H | -2.208343000 | 3.732517000  | -1.593192000 |
| H | -2.534727000 | 6.196773000  | -1.204811000 |
| H | -3.532658000 | 5.242375000  | -0.101293000 |
| H | -2.038298000 | 5.992113000  | 0.479628000  |
| H | -3.515303000 | 1.344117000  | 4.008945000  |
| H | -5.162269000 | 1.074173000  | 3.423379000  |
| H | -3.921951000 | -0.159210000 | 3.167896000  |
| H | -0.696109000 | -1.307126000 | 1.662259000  |
| H | 1.606258000  | -0.590543000 | 1.734574000  |
| O | -2.384689000 | 1.299115000  | -1.004208000 |
| H | -1.716804000 | -0.786398000 | 0.334692000  |
| H | 2.341517000  | 0.093539000  | 0.286749000  |
| H | 0.237612000  | 1.406403000  | 1.540308000  |
| C | 4.707345000  | -0.754658000 | 1.243105000  |
| C | 6.923143000  | -1.797878000 | -0.071710000 |
| C | 7.079196000  | -0.730642000 | 0.806804000  |
| C | 5.968166000  | -0.220349000 | 1.468155000  |
| H | 3.869236000  | -0.360425000 | 1.795386000  |
| H | 7.782582000  | -2.211536000 | -0.582200000 |
| H | 8.059396000  | -0.308505000 | 0.983313000  |
| H | 6.083970000  | 0.595833000  | 2.168895000  |
| C | 4.525354000  | -1.820367000 | 0.347311000  |
| C | 5.666783000  | -2.340214000 | -0.287070000 |
| H | 5.551335000  | -3.177244000 | -0.963511000 |
| H | 3.321918000  | -3.451483000 | -0.367868000 |



|   |              |              |              |
|---|--------------|--------------|--------------|
| C | -1.473970000 | -3.307747000 | -0.565650000 |
| C | -3.733537000 | -4.256740000 | -0.340389000 |
| C | -2.931313000 | -3.139228000 | -0.614479000 |
| C | -5.117345000 | -4.175039000 | -0.385783000 |
| C | -3.564137000 | -1.945022000 | -0.986917000 |
| C | -4.949693000 | -1.872156000 | -1.049632000 |
| C | -5.732287000 | -2.978937000 | -0.739686000 |
| H | -5.715256000 | -5.047546000 | -0.157756000 |
| H | -2.984984000 | -1.075011000 | -1.262007000 |
| H | -5.415518000 | -0.944685000 | -1.355464000 |
| H | -6.811245000 | -2.915395000 | -0.789372000 |
| H | -1.111625000 | -4.265118000 | -0.927143000 |
| H | -3.258834000 | -5.194608000 | -0.081163000 |
| O | 1.167503000  | -4.064032000 | -0.702767000 |

#### A43

|   |              |              |              |
|---|--------------|--------------|--------------|
| C | 0.717396000  | -3.079383000 | -0.092999000 |
| C | -0.663956000 | -2.507769000 | -0.031065000 |
| H | 3.674493000  | 4.189875000  | -2.127301000 |
| C | 1.306014000  | 1.827999000  | -1.561912000 |
| C | 2.220967000  | 2.611393000  | -2.254641000 |
| C | 2.960617000  | 3.582412000  | -1.587095000 |
| C | 2.780391000  | 3.765076000  | -0.220857000 |
| C | 1.864589000  | 2.981044000  | 0.471612000  |
| C | 1.119490000  | 2.006732000  | -0.190128000 |

|   |              |              |              |
|---|--------------|--------------|--------------|
| H | 0.734863000  | 1.066726000  | -2.073899000 |
| H | 2.356095000  | 2.463041000  | -3.317817000 |
| H | 3.356421000  | 4.512815000  | 0.308025000  |
| H | 1.728869000  | 3.126146000  | 1.535880000  |
| N | 0.257630000  | -0.256294000 | 0.215809000  |
| C | -0.838252000 | -1.147560000 | 0.596979000  |
| C | 1.848358000  | -2.142051000 | 0.212349000  |
| C | 1.511320000  | -0.779776000 | 0.763258000  |
| C | 3.091331000  | -2.617079000 | 0.029471000  |
| C | 0.104798000  | 1.160492000  | 0.563905000  |
| P | -1.594195000 | 1.840848000  | 0.236082000  |
| O | -2.336546000 | 1.448165000  | 1.602025000  |
| O | -1.449662000 | 3.431309000  | 0.404747000  |
| C | -3.742022000 | 1.747972000  | 1.791110000  |
| C | -4.175793000 | 1.157711000  | 3.113808000  |
| C | -1.410142000 | 4.333783000  | -0.731736000 |
| C | -2.140478000 | 5.606379000  | -0.363116000 |
| H | -3.867668000 | 2.831953000  | 1.781484000  |
| H | -4.305494000 | 1.323161000  | 0.959986000  |
| H | -0.362426000 | 4.530994000  | -0.958223000 |
| H | -1.868713000 | 3.840489000  | -1.587413000 |
| H | -2.082805000 | 6.315186000  | -1.190808000 |
| H | -3.192078000 | 5.408149000  | -0.155856000 |
| H | -1.694938000 | 6.070527000  | 0.516715000  |
| H | -3.596589000 | 1.579116000  | 3.935133000  |

|   |              |              |              |
|---|--------------|--------------|--------------|
| H | -5.230093000 | 1.378215000  | 3.287025000  |
| H | -4.046923000 | 0.075938000  | 3.116485000  |
| H | -1.781933000 | -0.719005000 | 0.292724000  |
| H | 1.434453000  | -0.856261000 | 1.865638000  |
| O | -2.251210000 | 1.422570000  | -1.025064000 |
| H | -0.880694000 | -1.266396000 | 1.695754000  |
| H | 2.308166000  | -0.074824000 | 0.561832000  |
| H | 0.245013000  | 1.333485000  | 1.643381000  |
| C | 5.437069000  | -2.699744000 | 0.780782000  |
| C | 5.942644000  | -0.117775000 | -0.087858000 |
| C | 6.954376000  | -0.849210000 | 0.524121000  |
| C | 6.696694000  | -2.145470000 | 0.955881000  |
| H | 5.246433000  | -3.714894000 | 1.104797000  |
| H | 6.139444000  | 0.882193000  | -0.450823000 |
| H | 7.938568000  | -0.418288000 | 0.650033000  |
| H | 7.480519000  | -2.729568000 | 1.419598000  |
| C | 4.395552000  | -1.963174000 | 0.199179000  |
| C | 4.677013000  | -0.665393000 | -0.247309000 |
| H | 3.916002000  | -0.092783000 | -0.757959000 |
| H | 3.134238000  | -3.662846000 | -0.258510000 |
| C | -1.657701000 | -3.277750000 | -0.506314000 |
| C | -3.986218000 | -4.063741000 | -0.392338000 |
| C | -3.094459000 | -3.011433000 | -0.647015000 |
| C | -5.356334000 | -3.890414000 | -0.521022000 |
| C | -3.621457000 | -1.788817000 | -1.086524000 |

|   |              |              |              |
|---|--------------|--------------|--------------|
| C | -4.992794000 | -1.624416000 | -1.232134000 |
| C | -5.866135000 | -2.666493000 | -0.940591000 |
| H | -6.024985000 | -4.713477000 | -0.306118000 |
| H | -2.968984000 | -0.968087000 | -1.348346000 |
| H | -5.375402000 | -0.676765000 | -1.587400000 |
| H | -6.933568000 | -2.531585000 | -1.054693000 |
| H | -1.345707000 | -4.271587000 | -0.811974000 |
| H | -3.592785000 | -5.023385000 | -0.081710000 |
| O | 0.921227000  | -4.238068000 | -0.419751000 |

#### A44

|   |              |              |              |
|---|--------------|--------------|--------------|
| C | -0.244479000 | -2.907921000 | 0.383189000  |
| C | 1.049732000  | -2.289196000 | -0.032823000 |
| H | -4.284377000 | 3.845169000  | 1.859851000  |
| C | -1.590326000 | 1.815373000  | 1.503689000  |
| C | -2.641966000 | 2.482781000  | 2.117252000  |
| C | -3.464421000 | 3.327918000  | 1.379715000  |
| C | -3.231657000 | 3.496531000  | 0.020513000  |
| C | -2.180022000 | 2.826096000  | -0.592861000 |
| C | -1.347100000 | 1.983881000  | 0.140369000  |
| H | -0.955870000 | 1.151658000  | 2.072599000  |
| H | -2.821495000 | 2.340886000  | 3.174790000  |
| H | -3.871327000 | 4.143942000  | -0.564595000 |
| H | -2.006378000 | 2.958386000  | -1.653407000 |
| N | -0.163341000 | -0.159217000 | -0.168428000 |

|   |              |              |              |
|---|--------------|--------------|--------------|
| C | 1.042965000  | -0.881242000 | -0.566145000 |
| C | -1.491568000 | -2.207066000 | -0.054080000 |
| C | -1.345714000 | -0.850526000 | -0.687743000 |
| C | -2.655753000 | -2.844580000 | 0.167482000  |
| C | -0.193105000 | 1.261742000  | -0.537398000 |
| P | 1.413306000  | 2.154631000  | -0.255922000 |
| O | 0.997504000  | 3.699820000  | -0.394458000 |
| O | 1.655647000  | 1.924429000  | 1.308683000  |
| C | 1.704217000  | 4.627602000  | -1.254735000 |
| C | 0.715033000  | 5.344979000  | -2.147913000 |
| C | 2.856010000  | 2.411249000  | 1.956824000  |
| C | 2.941117000  | 1.783400000  | 3.329790000  |
| H | 2.218843000  | 5.331474000  | -0.599303000 |
| H | 2.448066000  | 4.080179000  | -1.831279000 |
| H | 3.718267000  | 2.148397000  | 1.343136000  |
| H | 2.791719000  | 3.499249000  | 2.024307000  |
| H | 3.832542000  | 2.144130000  | 3.845089000  |
| H | 2.068621000  | 2.041985000  | 3.929151000  |
| H | 3.001594000  | 0.698272000  | 3.255212000  |
| H | -0.051992000 | 5.844871000  | -1.557191000 |
| H | 1.236186000  | 6.096157000  | -2.743999000 |
| H | 0.227828000  | 4.648111000  | -2.830074000 |
| H | 1.155308000  | -0.885610000 | -1.665983000 |
| H | -1.282553000 | -0.934719000 | -1.790181000 |
| O | 2.540959000  | 1.779829000  | -1.145583000 |

|   |              |              |              |
|---|--------------|--------------|--------------|
| H | 1.910303000  | -0.359499000 | -0.175566000 |
| H | -2.226605000 | -0.252302000 | -0.468456000 |
| H | -0.310889000 | 1.382224000  | -1.629700000 |
| C | -4.385643000 | -1.629289000 | -1.229552000 |
| C | -6.389301000 | -2.709003000 | 0.364963000  |
| C | -6.723148000 | -1.859374000 | -0.684774000 |
| C | -5.716781000 | -1.330516000 | -1.484581000 |
| H | -3.626018000 | -1.235803000 | -1.887222000 |
| H | -7.165673000 | -3.136711000 | 0.985235000  |
| H | -7.759300000 | -1.622295000 | -0.885650000 |
| H | -5.969382000 | -0.687337000 | -2.317115000 |
| C | -4.027153000 | -2.470051000 | -0.164663000 |
| C | -5.061420000 | -3.018596000 | 0.611566000  |
| H | -4.806781000 | -3.688899000 | 1.422393000  |
| H | -2.554691000 | -3.780914000 | 0.705872000  |
| C | 2.149275000  | -3.059028000 | 0.095089000  |
| C | 4.061533000  | -1.747007000 | -0.967411000 |
| C | 3.554022000  | -2.824312000 | -0.219220000 |
| C | 5.424412000  | -1.625468000 | -1.199823000 |
| C | 4.475172000  | -3.772528000 | 0.262518000  |
| C | 5.835045000  | -3.645783000 | 0.033187000  |
| C | 6.317229000  | -2.566927000 | -0.700430000 |
| H | 5.787658000  | -0.786789000 | -1.778509000 |
| H | 4.104006000  | -4.616451000 | 0.829642000  |
| H | 6.518320000  | -4.389302000 | 0.421579000  |

|   |              |              |              |
|---|--------------|--------------|--------------|
| H | 7.378023000  | -2.464357000 | -0.886645000 |
| H | 1.950645000  | -4.031823000 | 0.531319000  |
| H | 3.407611000  | -0.998651000 | -1.383770000 |
| O | -0.286065000 | -3.957505000 | 1.008150000  |

#### A45

|   |              |              |              |
|---|--------------|--------------|--------------|
| C | 0.894037000  | -2.227653000 | -0.329249000 |
| C | -0.480080000 | -1.797133000 | -0.751573000 |
| H | -1.699316000 | 6.208206000  | -1.886082000 |
| C | -0.264363000 | 4.048191000  | 0.302324000  |
| C | -0.765235000 | 5.237895000  | -0.209787000 |
| C | -1.311042000 | 5.280107000  | -1.488126000 |
| C | -1.344625000 | 4.121052000  | -2.251764000 |
| C | -0.840034000 | 2.929383000  | -1.741043000 |
| C | -0.299784000 | 2.874715000  | -0.457844000 |
| H | 0.144177000  | 4.023873000  | 1.302629000  |
| H | -0.724233000 | 6.135927000  | 0.392511000  |
| H | -1.757790000 | 4.141505000  | -3.251826000 |
| H | -0.846409000 | 2.040658000  | -2.354008000 |
| N | 0.411832000  | 0.504381000  | -0.867065000 |
| C | -0.670018000 | -0.376312000 | -1.246992000 |
| C | 2.042119000  | -1.319023000 | -0.650326000 |
| C | 1.712568000  | 0.021544000  | -1.270180000 |
| C | 3.273412000  | -1.752755000 | -0.324586000 |
| C | 0.287561000  | 1.570248000  | 0.097807000  |

|   |              |              |              |
|---|--------------|--------------|--------------|
| P | -0.531200000 | 1.137716000  | 1.722198000  |
| O | -2.061938000 | 0.770338000  | 1.375454000  |
| O | 0.158040000  | -0.273081000 | 2.029199000  |
| C | -3.190932000 | 1.431760000  | 2.004120000  |
| C | -4.112370000 | 1.993784000  | 0.942974000  |
| C | -0.140246000 | -0.984745000 | 3.259133000  |
| C | 1.011106000  | -1.913409000 | 3.573277000  |
| H | -3.698233000 | 0.674256000  | 2.602551000  |
| H | -2.816233000 | 2.208099000  | 2.668806000  |
| H | -0.293177000 | -0.257391000 | 4.057477000  |
| H | -1.066059000 | -1.540845000 | 3.103549000  |
| H | 0.787977000  | -2.473654000 | 4.483049000  |
| H | 1.172220000  | -2.620006000 | 2.760522000  |
| H | 1.927937000  | -1.347167000 | 3.736201000  |
| H | -4.459783000 | 1.207646000  | 0.272590000  |
| H | -4.984114000 | 2.446270000  | 1.419435000  |
| H | -3.608884000 | 2.759538000  | 0.353500000  |
| H | -1.609258000 | 0.017815000  | -0.867701000 |
| H | 2.470518000  | 0.756244000  | -1.003664000 |
| O | -0.396166000 | 2.160089000  | 2.787575000  |
| H | -0.750483000 | -0.384492000 | -2.345882000 |
| H | 1.735307000  | -0.055829000 | -2.368414000 |
| H | 1.298502000  | 1.800832000  | 0.443288000  |
| C | 5.611562000  | -1.457995000 | 0.365747000  |
| C | 6.140755000  | 0.320570000  | -1.691556000 |



|   |              |              |              |
|---|--------------|--------------|--------------|
| C | 7.141383000  | 0.002474000  | -0.780779000 |
| C | 6.871774000  | -0.893848000 | 0.248531000  |
| H | 5.409778000  | -2.162724000 | 1.162153000  |
| H | 6.348979000  | 0.997265000  | -2.509659000 |
| H | 8.126470000  | 0.438083000  | -0.880013000 |
| H | 7.647351000  | -1.158714000 | 0.954719000  |
| C | 4.576910000  | -1.124456000 | -0.523590000 |
| C | 4.874282000  | -0.233597000 | -1.566504000 |
| H | 4.126088000  | -0.001768000 | -2.309168000 |
| H | 3.296798000  | -2.703957000 | 0.196480000  |
| C | -1.453512000 | -2.721431000 | -0.640539000 |
| C | -3.482265000 | -1.738382000 | -1.817880000 |
| C | -2.876626000 | -2.670435000 | -0.958927000 |
| C | -4.848180000 | -1.774339000 | -2.060625000 |
| C | -3.701783000 | -3.649673000 | -0.379051000 |
| C | -5.067133000 | -3.678107000 | -0.612834000 |
| C | -5.648787000 | -2.735965000 | -1.454660000 |
| H | -5.288716000 | -1.050358000 | -2.733324000 |
| H | -3.253067000 | -4.391514000 | 0.268955000  |
| H | -5.677368000 | -4.439213000 | -0.145116000 |
| H | -6.713201000 | -2.758174000 | -1.646025000 |
| H | -1.125632000 | -3.661348000 | -0.209722000 |
| H | -2.885841000 | -0.998196000 | -2.326106000 |
| O | 1.076084000  | -3.300108000 | 0.230493000  |

B1

|   |              |              |              |
|---|--------------|--------------|--------------|
| C | -0.832867000 | -2.875061000 | 0.110619000  |
| C | 0.538100000  | -2.338694000 | -0.172968000 |
| H | 3.111947000  | 2.003840000  | 4.905232000  |
| C | 1.316161000  | 2.742614000  | 2.122892000  |
| C | 2.129227000  | 2.931105000  | 3.232529000  |
| C | 2.474700000  | 1.856408000  | 4.043516000  |
| C | 1.989235000  | 0.593217000  | 3.736201000  |
| C | 1.168424000  | 0.404410000  | 2.629664000  |
| C | 0.826702000  | 1.473655000  | 1.802059000  |
| H | 1.061839000  | 3.594327000  | 1.509433000  |
| H | 2.494497000  | 3.923615000  | 3.461982000  |
| H | 2.242937000  | -0.253709000 | 4.360122000  |
| H | 0.775847000  | -0.577067000 | 2.412062000  |
| N | -0.373458000 | -0.143841000 | 0.330759000  |
| C | 0.690801000  | -0.852473000 | -0.375070000 |
| C | -1.984458000 | -1.927550000 | -0.031305000 |
| C | -1.684401000 | -0.463571000 | -0.226250000 |
| C | -3.217698000 | -2.461073000 | 0.049157000  |
| C | -0.137015000 | 1.259781000  | 0.629383000  |
| P | 0.211018000  | 2.273575000  | -0.908923000 |
| O | -0.109790000 | 3.813936000  | -0.531784000 |
| O | 1.808569000  | 2.247877000  | -1.020364000 |
| C | -1.183677000 | 4.560811000  | -1.158476000 |
| C | -2.283473000 | 4.852258000  | -0.158525000 |

|   |              |              |              |
|---|--------------|--------------|--------------|
| C | 2.480711000  | 2.906493000  | -2.121998000 |
| C | 3.959737000  | 2.609588000  | -2.019015000 |
| H | -0.731445000 | 5.483945000  | -1.520911000 |
| H | -1.553310000 | 3.993852000  | -2.011136000 |
| H | 2.060496000  | 2.539633000  | -3.059155000 |
| H | 2.289923000  | 3.979012000  | -2.051308000 |
| H | 4.492449000  | 3.102258000  | -2.833761000 |
| H | 4.362625000  | 2.970812000  | -1.073456000 |
| H | 4.145370000  | 1.538037000  | -2.084636000 |
| H | -1.892651000 | 5.380547000  | 0.710908000  |
| H | -3.047436000 | 5.477454000  | -0.624149000 |
| H | -2.762558000 | 3.933516000  | 0.180911000  |
| H | 0.681820000  | -0.602339000 | -1.448421000 |
| H | -1.742373000 | -0.180947000 | -1.286782000 |
| O | -0.530915000 | 1.807202000  | -2.106800000 |
| H | 1.650987000  | -0.525056000 | 0.020074000  |
| H | -2.435047000 | 0.127149000  | 0.300552000  |
| H | -1.104234000 | 1.669003000  | 0.938733000  |
| C | -5.617908000 | -2.483728000 | 0.548650000  |
| C | -6.076409000 | -0.125408000 | -0.828741000 |
| C | -7.131285000 | -0.765880000 | -0.188799000 |
| C | -6.896395000 | -1.951967000 | 0.499152000  |
| H | -5.442302000 | -3.412430000 | 1.076117000  |
| H | -6.254774000 | 0.783649000  | -1.387793000 |
| H | -8.129681000 | -0.352332000 | -0.237325000 |

|   |              |              |              |
|---|--------------|--------------|--------------|
| H | -7.712267000 | -2.466199000 | 0.989448000  |
| C | -4.532048000 | -1.836048000 | -0.063991000 |
| C | -4.792499000 | -0.649423000 | -0.767947000 |
| H | -4.000062000 | -0.152075000 | -1.305468000 |
| H | -3.233321000 | -3.523446000 | 0.266954000  |
| C | 1.538403000  | -3.238998000 | -0.206813000 |
| C | 3.520933000  | -2.027417000 | -1.222767000 |
| C | 2.963325000  | -3.077903000 | -0.477307000 |
| C | 4.889835000  | -1.958335000 | -1.440493000 |
| C | 3.834717000  | -4.063733000 | 0.015359000  |
| C | 5.202674000  | -3.985768000 | -0.190211000 |
| C | 5.737763000  | -2.928746000 | -0.919015000 |
| H | 5.296521000  | -1.145870000 | -2.028085000 |
| H | 3.421406000  | -4.894304000 | 0.572954000  |
| H | 5.851582000  | -4.753442000 | 0.209786000  |
| H | 6.804258000  | -2.868638000 | -1.089555000 |
| H | 1.233431000  | -4.251279000 | 0.035834000  |
| H | 2.882088000  | -1.279294000 | -1.665630000 |
| O | -1.007551000 | -4.047809000 | 0.406207000  |

B2

|   |              |              |              |
|---|--------------|--------------|--------------|
| C | 1.106278000  | 2.668223000  | 0.125185000  |
| C | -0.289229000 | 2.232221000  | -0.203881000 |
| H | -2.807915000 | -1.926514000 | 5.188158000  |
| C | -1.180889000 | -0.418795000 | 2.619903000  |

|   |              |              |              |
|---|--------------|--------------|--------------|
| C | -1.926789000 | -0.557868000 | 3.785757000  |
| C | -2.230523000 | -1.819294000 | 4.279568000  |
| C | -1.774064000 | -2.943467000 | 3.600651000  |
| C | -1.033495000 | -2.807737000 | 2.433514000  |
| C | -0.735845000 | -1.540018000 | 1.921863000  |
| H | -0.920048000 | 0.566983000  | 2.267397000  |
| H | -2.262784000 | 0.326753000  | 4.310480000  |
| H | -1.989234000 | -3.933033000 | 3.981906000  |
| H | -0.688819000 | -3.690226000 | 1.912871000  |
| N | 0.445235000  | -0.028131000 | 0.318309000  |
| C | -0.550411000 | 0.760052000  | -0.397759000 |
| C | 2.189093000  | 1.637177000  | 0.030975000  |
| C | 1.785450000  | 0.202882000  | -0.201836000 |
| C | 3.452497000  | 2.072368000  | 0.192619000  |
| C | 0.114399000  | -1.402230000 | 0.655014000  |
| P | -0.579824000 | -2.472605000 | -0.721121000 |
| O | -2.063341000 | -1.935003000 | -1.051347000 |
| O | 0.285464000  | -1.943327000 | -1.968194000 |
| C | -3.252497000 | -2.751392000 | -0.871894000 |
| C | -4.200533000 | -2.086533000 | 0.102324000  |
| C | 0.216294000  | -2.632636000 | -3.244840000 |
| C | 1.355907000  | -3.619339000 | -3.392287000 |
| H | -2.949857000 | -3.740778000 | -0.533600000 |
| H | -3.705503000 | -2.846176000 | -1.859392000 |
| H | -0.748988000 | -3.132090000 | -3.337470000 |

|   |              |              |              |
|---|--------------|--------------|--------------|
| H | 0.265270000  | -1.847671000 | -3.998030000 |
| H | 1.311650000  | -4.087839000 | -4.377317000 |
| H | 2.317703000  | -3.115032000 | -3.297765000 |
| H | 1.288567000  | -4.396501000 | -2.633093000 |
| H | -3.754052000 | -2.010689000 | 1.092832000  |
| H | -4.471273000 | -1.085941000 | -0.234306000 |
| H | -5.113844000 | -2.679174000 | 0.182270000  |
| H | -0.554484000 | 0.506977000  | -1.470415000 |
| H | 2.478972000  | -0.453864000 | 0.323015000  |
| O | -0.521194000 | -3.935659000 | -0.482259000 |
| H | -1.538473000 | 0.509474000  | -0.018519000 |
| H | 1.850089000  | -0.054339000 | -1.271165000 |
| H | 1.060722000  | -1.910643000 | 0.856291000  |
| C | 4.938475000  | 0.156248000  | -0.551486000 |
| C | 7.047930000  | 1.288107000  | 0.860485000  |
| C | 7.237702000  | 0.093533000  | 0.173372000  |
| C | 6.181133000  | -0.461873000 | -0.539151000 |
| H | 4.146141000  | -0.275851000 | -1.142857000 |
| H | 7.866737000  | 1.735769000  | 1.407772000  |
| H | 8.203597000  | -0.393289000 | 0.182761000  |
| H | 6.326709000  | -1.378488000 | -1.095243000 |
| C | 4.721660000  | 1.352639000  | 0.150378000  |
| C | 5.811458000  | 1.912803000  | 0.837736000  |
| H | 5.671481000  | 2.846886000  | 1.366266000  |
| H | 3.534266000  | 3.128053000  | 0.427891000  |

|   |              |             |              |
|---|--------------|-------------|--------------|
| C | -1.216375000 | 3.205132000 | -0.290314000 |
| C | -3.261669000 | 2.116934000 | -1.329316000 |
| C | -2.638042000 | 3.152739000 | -0.614851000 |
| C | -4.622122000 | 2.160131000 | -1.601007000 |
| C | -3.434631000 | 4.237070000 | -0.208835000 |
| C | -4.795057000 | 4.271737000 | -0.468600000 |
| C | -5.396718000 | 3.229645000 | -1.166226000 |
| H | -5.078505000 | 1.356487000 | -2.163674000 |
| H | -2.968583000 | 5.055689000 | 0.324295000  |
| H | -5.385284000 | 5.114820000 | -0.135159000 |
| H | -6.456867000 | 3.256552000 | -1.379472000 |
| H | -0.842916000 | 4.195186000 | -0.051986000 |
| H | -2.683242000 | 1.287183000 | -1.703799000 |
| O | 1.356965000  | 3.827308000 | 0.419968000  |

### B3

|   |              |              |              |
|---|--------------|--------------|--------------|
| C | 1.245405000  | 2.612072000  | 0.070935000  |
| C | -0.173580000 | 2.223491000  | -0.211842000 |
| H | -2.813521000 | -1.555087000 | 5.355314000  |
| C | -1.052005000 | -0.258799000 | 2.760563000  |
| C | -1.788620000 | -0.305437000 | 3.939624000  |
| C | -2.242913000 | -1.519031000 | 4.436844000  |
| C | -1.948375000 | -2.689239000 | 3.746388000  |
| C | -1.215995000 | -2.645356000 | 2.567023000  |
| C | -0.764004000 | -1.424999000 | 2.054202000  |

|   |              |              |              |
|---|--------------|--------------|--------------|
| H | -0.677598000 | 0.687051000  | 2.400777000  |
| H | -1.999924000 | 0.613308000  | 4.470801000  |
| H | -2.283991000 | -3.644471000 | 4.128423000  |
| H | -0.993389000 | -3.564669000 | 2.042943000  |
| N | 0.480251000  | -0.044313000 | 0.384193000  |
| C | -0.501836000 | 0.757265000  | -0.334990000 |
| C | 2.283062000  | 1.534200000  | -0.011570000 |
| C | 1.815732000  | 0.109301000  | -0.172849000 |
| C | 3.567224000  | 1.925366000  | 0.087331000  |
| C | 0.093575000  | -1.386341000 | 0.784436000  |
| P | -0.620711000 | -2.491356000 | -0.550800000 |
| O | -2.091956000 | -1.893727000 | -0.797826000 |
| O | 0.240315000  | -2.049811000 | -1.841729000 |
| C | -3.232924000 | -2.729921000 | -1.119372000 |
| C | -4.414235000 | -2.300458000 | -0.276990000 |
| C | 0.677890000  | -3.010858000 | -2.835444000 |
| C | -0.280730000 | -3.071773000 | -4.007308000 |
| H | -3.438087000 | -2.600244000 | -2.183393000 |
| H | -2.968844000 | -3.770695000 | -0.937704000 |
| H | 1.659909000  | -2.662930000 | -3.153489000 |
| H | 0.785116000  | -3.983804000 | -2.358125000 |
| H | 0.120851000  | -3.734894000 | -4.775718000 |
| H | -1.251765000 | -3.461959000 | -3.702216000 |
| H | -0.423776000 | -2.084621000 | -4.446530000 |
| H | -4.651503000 | -1.249713000 | -0.442463000 |



|   |              |              |              |
|---|--------------|--------------|--------------|
| H | -5.289512000 | -2.896671000 | -0.541063000 |
| H | -4.205345000 | -2.443683000 | 0.782447000  |
| H | -0.549988000 | 0.460382000  | -1.395464000 |
| H | 1.847168000  | -0.192548000 | -1.231945000 |
| O | -0.583534000 | -3.951552000 | -0.286796000 |
| H | -1.486454000 | 0.564347000  | 0.085582000  |
| H | 2.493198000  | -0.553662000 | 0.365331000  |
| H | 1.020311000  | -1.920090000 | 1.013843000  |
| C | 5.946752000  | 1.719667000  | 0.632849000  |
| C | 6.174411000  | -0.742972000 | -0.613897000 |
| C | 7.281492000  | -0.182895000 | 0.013225000  |
| C | 7.162715000  | 1.055613000  | 0.635341000  |
| H | 5.861801000  | 2.687449000  | 1.109926000  |
| H | 6.263901000  | -1.695583000 | -1.119062000 |
| H | 8.231003000  | -0.700973000 | 0.006734000  |
| H | 8.020803000  | 1.506471000  | 1.115723000  |
| C | 4.807771000  | 1.158564000  | 0.031050000  |
| C | 4.952696000  | -0.084479000 | -0.605707000 |
| H | 4.119090000  | -0.524830000 | -1.130339000 |
| H | 3.696282000  | 2.986290000  | 0.272272000  |
| C | -1.059483000 | 3.231570000  | -0.326118000 |
| C | -3.175998000 | 2.184434000  | -1.260694000 |
| C | -2.488269000 | 3.228934000  | -0.621544000 |
| C | -4.538514000 | 2.277382000  | -1.507997000 |
| C | -3.223670000 | 4.372683000  | -0.266048000 |

|   |              |             |              |
|---|--------------|-------------|--------------|
| C | -4.586199000 | 4.458289000 | -0.501836000 |
| C | -5.251789000 | 3.407189000 | -1.123724000 |
| H | -5.045079000 | 1.464636000 | -2.011601000 |
| H | -2.707982000 | 5.197433000 | 0.208726000  |
| H | -5.128419000 | 5.347184000 | -0.208242000 |
| H | -6.314041000 | 3.472629000 | -1.317274000 |
| H | -0.638492000 | 4.213979000 | -0.141569000 |
| H | -2.645844000 | 1.306887000 | -1.595041000 |
| O | 1.550863000  | 3.769197000 | 0.318071000  |

#### B4

|   |              |              |              |
|---|--------------|--------------|--------------|
| C | -0.349543000 | -2.947725000 | 0.476874000  |
| C | -1.559709000 | -2.219839000 | -0.017611000 |
| H | -4.041555000 | 3.974884000  | 1.884486000  |
| C | -1.546392000 | 1.721677000  | 1.437290000  |
| C | -2.545439000 | 2.444376000  | 2.077973000  |
| C | -3.260214000 | 3.415939000  | 1.387087000  |
| C | -2.974107000 | 3.653936000  | 0.047727000  |
| C | -1.975913000 | 2.929793000  | -0.591241000 |
| C | -1.245650000 | 1.961314000  | 0.096410000  |
| H | -1.007770000 | 0.945658000  | 1.962332000  |
| H | -2.771227000 | 2.241303000  | 3.116540000  |
| H | -3.533681000 | 4.398663000  | -0.502736000 |
| H | -1.761074000 | 3.118904000  | -1.635080000 |
| N | -0.155115000 | -0.227881000 | -0.186615000 |

|   |              |              |              |
|---|--------------|--------------|--------------|
| C | -1.342828000 | -0.905004000 | -0.714200000 |
| C | 0.974998000  | -2.394047000 | 0.068016000  |
| C | 1.041946000  | -1.003070000 | -0.506686000 |
| C | 2.039274000  | -3.205301000 | 0.236590000  |
| C | -0.145433000 | 1.179382000  | -0.605756000 |
| P | 1.516766000  | 2.008134000  | -0.430858000 |
| O | 1.119233000  | 3.551106000  | -0.637612000 |
| O | 1.985360000  | 1.862260000  | 1.092359000  |
| C | 2.039589000  | 4.485130000  | -1.260295000 |
| C | 1.238467000  | 5.512647000  | -2.028475000 |
| C | 1.726001000  | 2.756446000  | 2.198521000  |
| C | 3.026548000  | 3.037153000  | 2.921345000  |
| H | 2.623561000  | 4.956255000  | -0.467467000 |
| H | 2.717474000  | 3.931256000  | -1.908013000 |
| H | 1.268396000  | 3.671850000  | 1.826145000  |
| H | 1.012500000  | 2.260160000  | 2.855087000  |
| H | 2.835743000  | 3.669919000  | 3.790030000  |
| H | 3.484351000  | 2.110053000  | 3.264527000  |
| H | 3.735391000  | 3.549154000  | 2.270676000  |
| H | 0.534801000  | 6.027561000  | -1.374852000 |
| H | 1.911825000  | 6.253758000  | -2.462067000 |
| H | 0.680064000  | 5.043327000  | -2.838125000 |
| H | -1.243035000 | -1.047855000 | -1.807268000 |
| H | 1.907508000  | -0.502084000 | -0.084255000 |
| O | 2.542890000  | 1.511047000  | -1.373716000 |

|   |              |              |              |
|---|--------------|--------------|--------------|
| H | -2.208640000 | -0.265456000 | -0.558927000 |
| H | 1.208403000  | -1.044371000 | -1.597182000 |
| H | -0.304844000 | 1.268260000  | -1.694306000 |
| C | 4.026512000  | -1.994154000 | -0.808778000 |
| C | 5.690884000  | -3.974041000 | 0.223200000  |
| C | 6.234866000  | -2.925099000 | -0.510612000 |
| C | 5.396338000  | -1.942848000 | -1.025071000 |
| H | 3.417964000  | -1.213985000 | -1.235725000 |
| H | 6.331461000  | -4.748142000 | 0.624435000  |
| H | 7.301660000  | -2.876486000 | -0.684113000 |
| H | 5.807850000  | -1.125620000 | -1.602036000 |
| C | 3.456950000  | -3.040998000 | -0.061608000 |
| C | 4.323933000  | -4.030817000 | 0.437085000  |
| H | 3.904458000  | -4.851268000 | 1.005023000  |
| H | 1.792237000  | -4.156520000 | 0.695004000  |
| C | -2.753901000 | -2.794583000 | 0.213929000  |
| C | -5.171677000 | -2.817356000 | 0.631831000  |
| C | -4.101000000 | -2.375165000 | -0.162444000 |
| C | -6.478366000 | -2.455810000 | 0.345513000  |
| C | -4.402125000 | -1.589370000 | -1.285289000 |
| C | -5.712578000 | -1.239245000 | -1.579560000 |
| C | -6.754758000 | -1.660621000 | -0.762016000 |
| H | -7.283382000 | -2.801137000 | 0.980474000  |
| H | -3.614853000 | -1.280616000 | -1.955848000 |
| H | -5.920932000 | -0.640381000 | -2.456252000 |

|   |              |              |              |
|---|--------------|--------------|--------------|
| H | -7.774500000 | -1.383635000 | -0.993393000 |
| H | -2.703715000 | -3.705731000 | 0.800644000  |
| H | -4.962695000 | -3.445561000 | 1.488169000  |
| O | -0.446164000 | -3.968805000 | 1.142061000  |

## B5

|   |              |              |              |
|---|--------------|--------------|--------------|
| C | -0.081413000 | -2.481999000 | 0.606930000  |
| C | 1.273004000  | -2.120291000 | 0.070574000  |
| H | 4.800185000  | 3.808196000  | -1.089123000 |
| C | 1.871533000  | 2.193134000  | -1.654103000 |
| C | 3.002619000  | 2.958554000  | -1.906506000 |
| C | 3.917831000  | 3.214524000  | -0.890152000 |
| C | 3.694880000  | 2.699375000  | 0.381045000  |
| C | 2.562224000  | 1.933245000  | 0.633227000  |
| C | 1.641126000  | 1.672888000  | -0.379092000 |
| H | 1.155401000  | 1.993538000  | -2.438783000 |
| H | 3.169197000  | 3.357956000  | -2.898279000 |
| H | 4.405136000  | 2.886372000  | 1.175456000  |
| H | 2.394128000  | 1.530596000  | 1.623906000  |
| N | 0.230571000  | -0.199339000 | -1.104555000 |
| C | 1.322184000  | -1.172927000 | -1.108195000 |
| C | -1.275129000 | -1.949394000 | -0.128782000 |
| C | -1.046426000 | -0.899954000 | -1.197868000 |
| C | -2.466554000 | -2.471163000 | 0.224335000  |
| C | 0.389542000  | 0.855106000  | -0.094714000 |

|   |              |              |              |
|---|--------------|--------------|--------------|
| P | -1.051441000 | 2.029853000  | -0.043461000 |
| O | -2.035883000 | 1.264610000  | 0.962919000  |
| O | -0.560310000 | 3.252130000  | 0.879481000  |
| C | -3.327658000 | 1.832270000  | 1.295806000  |
| C | -3.926265000 | 1.020153000  | 2.421792000  |
| C | -0.163440000 | 4.532515000  | 0.326853000  |
| C | -0.669800000 | 5.631861000  | 1.235263000  |
| H | -3.186868000 | 2.872491000  | 1.593978000  |
| H | -3.955170000 | 1.808491000  | 0.404618000  |
| H | 0.924810000  | 4.540392000  | 0.267757000  |
| H | -0.571146000 | 4.623243000  | -0.678915000 |
| H | -0.336849000 | 6.601075000  | 0.860048000  |
| H | -1.759159000 | 5.637094000  | 1.274618000  |
| H | -0.286811000 | 5.506905000  | 2.248107000  |
| H | -3.285115000 | 1.048651000  | 3.302464000  |
| H | -4.901522000 | 1.429188000  | 2.690580000  |
| H | -4.060517000 | -0.018066000 | 2.122234000  |
| H | 1.247987000  | -1.727784000 | -2.050336000 |
| H | -1.062011000 | -1.372870000 | -2.187299000 |
| O | -1.614078000 | 2.440210000  | -1.350419000 |
| H | 2.271730000  | -0.644159000 | -1.130600000 |
| H | -1.856166000 | -0.175580000 | -1.201135000 |
| H | 0.460214000  | 0.470970000  | 0.932901000  |
| C | -4.880928000 | -2.701205000 | 0.521175000  |
| C | -5.464616000 | -1.439537000 | -1.871234000 |

|   |              |              |              |
|---|--------------|--------------|--------------|
| C | -6.500110000 | -1.884647000 | -1.057206000 |
| C | -6.201435000 | -2.521315000 | 0.142865000  |
| H | -4.653536000 | -3.205832000 | 1.451369000  |
| H | -5.686840000 | -0.957983000 | -2.814162000 |
| H | -7.529225000 | -1.746460000 | -1.360443000 |
| H | -6.997785000 | -2.883391000 | 0.779407000  |
| C | -3.817200000 | -2.237933000 | -0.273923000 |
| C | -4.141585000 | -1.611844000 | -1.489519000 |
| H | -3.365305000 | -1.276528000 | -2.157550000 |
| H | -2.412451000 | -3.180421000 | 1.043402000  |
| C | 2.334416000  | -2.652922000 | 0.705556000  |
| C | 4.308766000  | -2.305178000 | -0.844923000 |
| C | 3.763399000  | -2.543740000 | 0.426032000  |
| C | 5.682159000  | -2.222766000 | -1.026350000 |
| C | 4.654823000  | -2.728275000 | 1.495938000  |
| C | 6.025369000  | -2.633198000 | 1.316444000  |
| C | 6.545682000  | -2.375625000 | 0.052242000  |
| H | 6.079998000  | -2.046299000 | -2.016826000 |
| H | 4.254363000  | -2.940729000 | 2.478893000  |
| H | 6.689397000  | -2.769029000 | 2.159679000  |
| H | 7.615493000  | -2.309486000 | -0.093582000 |
| H | 2.084915000  | -3.242896000 | 1.581587000  |
| H | 3.661466000  | -2.220549000 | -1.704147000 |
| O | -0.203769000 | -3.205423000 | 1.584635000  |

B6

|   |              |              |              |
|---|--------------|--------------|--------------|
| C | 0.393231000  | -3.016002000 | -0.417807000 |
| C | 1.591281000  | -2.249200000 | 0.045701000  |
| H | 4.343118000  | 3.791206000  | -1.846843000 |
| C | 1.648805000  | 1.750810000  | -1.553461000 |
| C | 2.709640000  | 2.426029000  | -2.144329000 |
| C | 3.516313000  | 3.268023000  | -1.385141000 |
| C | 3.256397000  | 3.430401000  | -0.029234000 |
| C | 2.194431000  | 2.754546000  | 0.561512000  |
| C | 1.382046000  | 1.909875000  | -0.192517000 |
| H | 1.021014000  | 1.093239000  | -2.137675000 |
| H | 2.905844000  | 2.294935000  | -3.200186000 |
| H | 3.882224000  | 4.077674000  | 0.570767000  |
| H | 1.995653000  | 2.884237000  | 1.617848000  |
| N | 0.213448000  | -0.232700000 | 0.074784000  |
| C | 1.333868000  | -0.926462000 | 0.713924000  |
| C | -0.946480000 | -2.385840000 | -0.190298000 |
| C | -1.024751000 | -0.966792000 | 0.320477000  |
| C | -2.014124000 | -3.155529000 | -0.481037000 |
| C | 0.206330000  | 1.186366000  | 0.446499000  |
| P | -1.349010000 | 2.094632000  | -0.016799000 |
| O | -2.287701000 | 1.746781000  | 1.240616000  |
| O | -1.016531000 | 3.641283000  | 0.271220000  |
| C | -3.640548000 | 2.262127000  | 1.295016000  |
| C | -4.247565000 | 1.857269000  | 2.619680000  |



|   |              |              |              |
|---|--------------|--------------|--------------|
| C | -0.769308000 | 4.592087000  | -0.797142000 |
| C | -1.250144000 | 5.953914000  | -0.346510000 |
| H | -3.605277000 | 3.348469000  | 1.197995000  |
| H | -4.201662000 | 1.856962000  | 0.452330000  |
| H | 0.302459000  | 4.599105000  | -0.995544000 |
| H | -1.289637000 | 4.255922000  | -1.692644000 |
| H | -0.744846000 | 6.262095000  | 0.568704000  |
| H | -1.037414000 | 6.692575000  | -1.120994000 |
| H | -2.324919000 | 5.949910000  | -0.164587000 |
| H | -3.672879000 | 2.266102000  | 3.450350000  |
| H | -5.268741000 | 2.235089000  | 2.688669000  |
| H | -4.275911000 | 0.772639000  | 2.722452000  |
| H | 2.213094000  | -0.295545000 | 0.676378000  |
| H | -1.836444000 | -0.460362000 | -0.197039000 |
| O | -1.909078000 | 1.829770000  | -1.360457000 |
| H | 1.116221000  | -1.094456000 | 1.786399000  |
| H | -1.270520000 | -0.968994000 | 1.398218000  |
| H | 0.268031000  | 1.320537000  | 1.538657000  |
| C | -4.295728000 | -3.764570000 | -1.109685000 |
| C | -5.428522000 | -1.773680000 | 0.442457000  |
| C | -6.246296000 | -2.611233000 | -0.307453000 |
| C | -5.672192000 | -3.611666000 | -1.084497000 |
| H | -3.853838000 | -4.550172000 | -1.708783000 |
| H | -5.869518000 | -1.005822000 | 1.064381000  |
| H | -7.321022000 | -2.491655000 | -0.278960000 |

|   |              |              |              |
|---|--------------|--------------|--------------|
| H | -6.298354000 | -4.275981000 | -1.664929000 |
| C | -3.448222000 | -2.912619000 | -0.380102000 |
| C | -4.048830000 | -1.917187000 | 0.407906000  |
| H | -3.443267000 | -1.268361000 | 1.019733000  |
| H | -1.754205000 | -4.126760000 | -0.887664000 |
| C | 2.789822000  | -2.835782000 | -0.102873000 |
| C | 4.580901000  | -1.052512000 | -0.029567000 |
| C | 4.132209000  | -2.351029000 | 0.244151000  |
| C | 5.873620000  | -0.664696000 | 0.295924000  |
| C | 5.035991000  | -3.252310000 | 0.824030000  |
| C | 6.322070000  | -2.859135000 | 1.164445000  |
| C | 6.745620000  | -1.560557000 | 0.904139000  |
| H | 6.202006000  | 0.339840000  | 0.064617000  |
| H | 4.715683000  | -4.268435000 | 1.015866000  |
| H | 6.997137000  | -3.569180000 | 1.623459000  |
| H | 7.751104000  | -1.253830000 | 1.159417000  |
| H | 2.751725000  | -3.841115000 | -0.510559000 |
| H | 3.931873000  | -0.352608000 | -0.535874000 |
| O | 0.504948000  | -4.112298000 | -0.945220000 |

B7

|   |              |              |              |
|---|--------------|--------------|--------------|
| C | -0.862082000 | -2.879148000 | 0.040598000  |
| C | 0.521613000  | -2.335653000 | -0.158447000 |
| H | 3.763050000  | 1.654561000  | 4.440264000  |
| C | 2.033794000  | 2.401131000  | 1.615414000  |

|   |              |              |              |
|---|--------------|--------------|--------------|
| C | 2.998440000  | 2.490152000  | 2.614718000  |
| C | 3.010834000  | 1.584521000  | 3.665835000  |
| C | 2.044779000  | 0.585289000  | 3.712368000  |
| C | 1.082052000  | 0.496924000  | 2.716493000  |
| C | 1.061858000  | 1.401739000  | 1.650100000  |
| H | 2.051282000  | 3.122359000  | 0.814461000  |
| H | 3.743864000  | 3.272919000  | 2.563827000  |
| H | 2.038299000  | -0.127897000 | 4.526081000  |
| H | 0.339315000  | -0.286923000 | 2.749450000  |
| N | -0.358098000 | -0.130670000 | 0.332105000  |
| C | 0.646674000  | -0.859240000 | -0.435913000 |
| C | -2.002156000 | -1.906874000 | -0.020781000 |
| C | -1.706539000 | -0.432177000 | -0.136298000 |
| C | -3.240098000 | -2.434880000 | 0.044276000  |
| C | -0.072467000 | 1.268476000  | 0.626748000  |
| P | -0.000650000 | 2.348544000  | -0.894891000 |
| O | 0.060921000  | 3.875876000  | -0.373664000 |
| O | 1.470220000  | 2.088825000  | -1.477554000 |
| C | -0.988766000 | 4.840242000  | -0.641258000 |
| C | -1.729587000 | 5.186808000  | 0.633539000  |
| C | 1.858695000  | 2.639917000  | -2.761773000 |
| C | 3.194204000  | 2.046076000  | -3.148995000 |
| H | -0.487587000 | 5.716735000  | -1.051754000 |
| H | -1.657229000 | 4.432595000  | -1.397839000 |
| H | 1.085170000  | 2.401960000  | -3.492069000 |

|   |              |              |              |
|---|--------------|--------------|--------------|
| H | 1.923436000  | 3.725476000  | -2.663844000 |
| H | 3.516037000  | 2.458250000  | -4.106592000 |
| H | 3.953570000  | 2.276798000  | -2.402357000 |
| H | 3.124362000  | 0.963399000  | -3.246914000 |
| H | -1.041952000 | 5.544065000  | 1.399728000  |
| H | -2.459345000 | 5.973203000  | 0.432548000  |
| H | -2.266466000 | 4.322589000  | 1.025670000  |
| H | 0.520766000  | -0.684163000 | -1.517917000 |
| H | -1.850682000 | -0.089366000 | -1.169938000 |
| O | -1.115187000 | 2.103084000  | -1.843267000 |
| H | 1.631655000  | -0.488777000 | -0.178821000 |
| H | -2.415102000 | 0.125916000  | 0.478281000  |
| H | -0.977627000 | 1.660776000  | 1.105475000  |
| C | -4.826309000 | -0.540287000 | -0.546277000 |
| C | -6.920098000 | -2.011512000 | 0.544521000  |
| C | -7.165032000 | -0.750882000 | 0.009777000  |
| C | -6.115379000 | -0.025649000 | -0.542335000 |
| H | -4.040341000 | 0.033374000  | -1.011420000 |
| H | -7.731343000 | -2.590564000 | 0.965242000  |
| H | -8.166967000 | -0.342977000 | 0.011837000  |
| H | -6.301061000 | 0.945877000  | -0.980857000 |
| C | -4.555440000 | -1.804655000 | 0.003120000  |
| C | -5.636673000 | -2.532628000 | 0.529402000  |
| H | -5.452259000 | -3.518522000 | 0.936460000  |
| H | -3.258083000 | -3.510507000 | 0.181569000  |

|   |              |              |              |
|---|--------------|--------------|--------------|
| C | 1.530726000  | -3.221128000 | -0.142724000 |
| C | 3.701159000  | -3.925871000 | -1.076389000 |
| C | 2.976620000  | -3.012182000 | -0.298077000 |
| C | 5.070830000  | -3.791354000 | -1.250775000 |
| C | 3.683547000  | -1.985671000 | 0.341491000  |
| C | 5.057023000  | -1.862084000 | 0.180639000  |
| C | 5.754988000  | -2.755566000 | -0.624107000 |
| H | 5.606239000  | -4.501548000 | -1.866898000 |
| H | 3.165594000  | -1.303861000 | 1.000585000  |
| H | 5.583914000  | -1.068971000 | 0.694335000  |
| H | 6.824759000  | -2.654737000 | -0.749506000 |
| H | 1.222082000  | -4.255929000 | -0.032128000 |
| H | 3.175460000  | -4.742696000 | -1.554257000 |
| O | -1.052158000 | -4.070273000 | 0.235309000  |

B8

|   |              |              |              |
|---|--------------|--------------|--------------|
| C | 1.202235000  | 2.593381000  | 0.137562000  |
| C | -0.212989000 | 2.198155000  | -0.155826000 |
| H | -2.822389000 | -1.718873000 | 5.339667000  |
| C | -1.147088000 | -0.345626000 | 2.727380000  |
| C | -1.884686000 | -0.424073000 | 3.904182000  |
| C | -2.251618000 | -1.658398000 | 4.422594000  |
| C | -1.867433000 | -2.816736000 | 3.756758000  |
| C | -1.134265000 | -2.741645000 | 2.579452000  |
| C | -0.771785000 | -1.500957000 | 2.043625000  |

|   |              |              |              |
|---|--------------|--------------|--------------|
| H | -0.836549000 | 0.618395000  | 2.355477000  |
| H | -2.164071000 | 0.486407000  | 4.417790000  |
| H | -2.132570000 | -3.786585000 | 4.156820000  |
| H | -0.843091000 | -3.650597000 | 2.071745000  |
| N | 0.454046000  | -0.074695000 | 0.397042000  |
| C | -0.523862000 | 0.732432000  | -0.322053000 |
| C | 2.248493000  | 1.525225000  | 0.042254000  |
| C | 1.794841000  | 0.098550000  | -0.142010000 |
| C | 3.529069000  | 1.925108000  | 0.153890000  |
| C | 0.079662000  | -1.428208000 | 0.770244000  |
| P | -0.659953000 | -2.506234000 | -0.575246000 |
| O | -2.129256000 | -1.935645000 | -0.920172000 |
| O | 0.191731000  | -2.031146000 | -1.852077000 |
| C | -3.337741000 | -2.591454000 | -0.452439000 |
| C | -4.385156000 | -2.519723000 | -1.541686000 |
| C | 0.078886000  | -2.760841000 | -3.101680000 |
| C | 1.221456000  | -2.348594000 | -4.002309000 |
| H | -3.099228000 | -3.621881000 | -0.194309000 |
| H | -3.665740000 | -2.070969000 | 0.447413000  |
| H | 0.106020000  | -3.828729000 | -2.884919000 |
| H | -0.885542000 | -2.519557000 | -3.551733000 |
| H | 2.181161000  | -2.596180000 | -3.549350000 |
| H | 1.146732000  | -2.875865000 | -4.954529000 |
| H | 1.196621000  | -1.277476000 | -4.201686000 |
| H | -4.057539000 | -3.053520000 | -2.433768000 |

|   |              |              |              |
|---|--------------|--------------|--------------|
| H | -5.311941000 | -2.976389000 | -1.190461000 |
| H | -4.596333000 | -1.485521000 | -1.813382000 |
| H | -0.549542000 | 0.461489000  | -1.389840000 |
| H | 1.841551000  | -0.191437000 | -1.203607000 |
| O | -0.635859000 | -3.962536000 | -0.297891000 |
| H | -1.514699000 | 0.520976000  | 0.073658000  |
| H | 2.472128000  | -0.564398000 | 0.396339000  |
| H | 1.009352000  | -1.961663000 | 0.983644000  |
| C | 5.907115000  | 1.733600000  | 0.708764000  |
| C | 6.162021000  | -0.713913000 | -0.562083000 |
| C | 7.260952000  | -0.151213000 | 0.076943000  |
| C | 7.128542000  | 1.079728000  | 0.711203000  |
| H | 5.811457000  | 2.695531000  | 1.195564000  |
| H | 6.262073000  | -1.660523000 | -1.076415000 |
| H | 8.214728000  | -0.661407000 | 0.070450000  |
| H | 7.980147000  | 1.532598000  | 1.201142000  |
| C | 4.776115000  | 1.169311000  | 0.094875000  |
| C | 4.934738000  | -0.065856000 | -0.553980000 |
| H | 4.108005000  | -0.508212000 | -1.087649000 |
| H | 3.648580000  | 2.984225000  | 0.354901000  |
| C | -1.111294000 | 3.198143000  | -0.236944000 |
| C | -3.209152000 | 2.159939000  | -1.220570000 |
| C | -2.540699000 | 3.184269000  | -0.530426000 |
| C | -4.573281000 | 2.239810000  | -1.463609000 |
| C | -3.296670000 | 4.295354000  | -0.119239000 |

|   |              |             |              |
|---|--------------|-------------|--------------|
| C | -4.660841000 | 4.366760000 | -0.350333000 |
| C | -5.307190000 | 3.335495000 | -1.023727000 |
| H | -5.064790000 | 1.444639000 | -2.008476000 |
| H | -2.795837000 | 5.105512000 | 0.394938000  |
| H | -5.219309000 | 5.229906000 | -0.013540000 |
| H | -6.370509000 | 3.390931000 | -1.214515000 |
| H | -0.702959000 | 4.179589000 | -0.021267000 |
| H | -2.662489000 | 1.310798000 | -1.599400000 |
| O | 1.496795000  | 3.748954000 | 0.404371000  |

68

symmetry c1

|   |              |              |              |
|---|--------------|--------------|--------------|
| C | 1.202235000  | 2.593381000  | 0.137562000  |
| C | -0.212989000 | 2.198155000  | -0.155826000 |
| H | -2.822389000 | -1.718873000 | 5.339667000  |
| C | -1.147088000 | -0.345626000 | 2.727380000  |
| C | -1.884686000 | -0.424073000 | 3.904182000  |
| C | -2.251618000 | -1.658398000 | 4.422594000  |
| C | -1.867433000 | -2.816736000 | 3.756758000  |
| C | -1.134265000 | -2.741645000 | 2.579452000  |
| C | -0.771785000 | -1.500957000 | 2.043625000  |
| H | -0.836549000 | 0.618395000  | 2.355477000  |
| H | -2.164071000 | 0.486407000  | 4.417790000  |
| H | -2.132570000 | -3.786585000 | 4.156820000  |
| H | -0.843091000 | -3.650597000 | 2.071745000  |



|   |              |              |              |
|---|--------------|--------------|--------------|
| N | 0.454046000  | -0.074695000 | 0.397042000  |
| C | -0.523862000 | 0.732432000  | -0.322053000 |
| C | 2.248493000  | 1.525225000  | 0.042254000  |
| C | 1.794841000  | 0.098550000  | -0.142010000 |
| C | 3.529069000  | 1.925108000  | 0.153890000  |
| C | 0.079662000  | -1.428208000 | 0.770244000  |
| P | -0.659953000 | -2.506234000 | -0.575246000 |
| O | -2.129256000 | -1.935645000 | -0.920172000 |
| O | 0.191731000  | -2.031146000 | -1.852077000 |
| C | -3.337741000 | -2.591454000 | -0.452439000 |
| C | -4.385156000 | -2.519723000 | -1.541686000 |
| C | 0.078886000  | -2.760841000 | -3.101680000 |
| C | 1.221456000  | -2.348594000 | -4.002309000 |
| H | -3.099228000 | -3.621881000 | -0.194309000 |
| H | -3.665740000 | -2.070969000 | 0.447413000  |
| H | 0.106020000  | -3.828729000 | -2.884919000 |
| H | -0.885542000 | -2.519557000 | -3.551733000 |
| H | 2.181161000  | -2.596180000 | -3.549350000 |
| H | 1.146732000  | -2.875865000 | -4.954529000 |
| H | 1.196621000  | -1.277476000 | -4.201686000 |
| H | -4.057539000 | -3.053520000 | -2.433768000 |
| H | -5.311941000 | -2.976389000 | -1.190461000 |
| H | -4.596333000 | -1.485521000 | -1.813382000 |
| H | -0.549542000 | 0.461489000  | -1.389840000 |
| H | 1.841551000  | -0.191437000 | -1.203607000 |

|   |              |              |              |
|---|--------------|--------------|--------------|
| O | -0.635859000 | -3.962536000 | -0.297891000 |
| H | -1.514699000 | 0.520976000  | 0.073658000  |
| H | 2.472128000  | -0.564398000 | 0.396339000  |
| H | 1.009352000  | -1.961663000 | 0.983644000  |
| C | 5.907115000  | 1.733600000  | 0.708764000  |
| C | 6.162021000  | -0.713913000 | -0.562083000 |
| C | 7.260952000  | -0.151213000 | 0.076943000  |
| C | 7.128542000  | 1.079728000  | 0.711203000  |
| H | 5.811457000  | 2.695531000  | 1.195564000  |
| H | 6.262073000  | -1.660523000 | -1.076415000 |
| H | 8.214728000  | -0.661407000 | 0.070450000  |
| H | 7.980147000  | 1.532598000  | 1.201142000  |
| C | 4.776115000  | 1.169311000  | 0.094875000  |
| C | 4.934738000  | -0.065856000 | -0.553980000 |
| H | 4.108005000  | -0.508212000 | -1.087649000 |
| H | 3.648580000  | 2.984225000  | 0.354901000  |
| C | -1.111294000 | 3.198143000  | -0.236944000 |
| C | -3.209152000 | 2.159939000  | -1.220570000 |
| C | -2.540699000 | 3.184269000  | -0.530426000 |
| C | -4.573281000 | 2.239810000  | -1.463609000 |
| C | -3.296670000 | 4.295354000  | -0.119239000 |
| C | -4.660841000 | 4.366760000  | -0.350333000 |
| C | -5.307190000 | 3.335495000  | -1.023727000 |
| H | -5.064790000 | 1.444639000  | -2.008476000 |
| H | -2.795837000 | 5.105512000  | 0.394938000  |

|   |              |             |              |
|---|--------------|-------------|--------------|
| H | -5.219309000 | 5.229906000 | -0.013540000 |
| H | -6.370509000 | 3.390931000 | -1.214515000 |
| H | -0.702959000 | 4.179589000 | -0.021267000 |
| H | -2.662489000 | 1.310798000 | -1.599400000 |
| O | 1.496795000  | 3.748954000 | 0.4043710009 |

#### B9

|   |              |              |              |
|---|--------------|--------------|--------------|
| C | -0.385904000 | -2.570049000 | -0.206726000 |
| C | 0.916047000  | -1.961828000 | -0.635560000 |
| H | 1.210430000  | -1.140422000 | 4.972536000  |
| C | -0.802260000 | -0.002948000 | 2.496367000  |
| C | -0.429324000 | -0.572611000 | 3.706750000  |
| C | 0.916031000  | -0.696181000 | 4.031046000  |
| C | 1.880400000  | -0.239381000 | 3.140884000  |
| C | 1.506011000  | 0.331375000  | 1.930866000  |
| C | 0.156965000  | 0.447428000  | 1.587481000  |
| H | -1.853214000 | 0.090100000  | 2.253462000  |
| H | -1.189040000 | -0.918236000 | 4.395173000  |
| H | 2.930252000  | -0.323160000 | 3.388557000  |
| H | 2.266695000  | 0.704368000  | 1.258900000  |
| N | -0.283462000 | 0.213255000  | -0.946622000 |
| C | 0.904629000  | -0.574552000 | -1.247751000 |
| C | -1.646680000 | -1.820580000 | -0.529583000 |
| C | -1.504846000 | -0.508683000 | -1.268653000 |
| C | -2.802483000 | -2.364422000 | -0.106829000 |

|   |              |              |              |
|---|--------------|--------------|--------------|
| C | -0.298825000 | 1.049974000  | 0.264952000  |
| P | 0.573601000  | 2.612705000  | -0.188028000 |
| O | -0.351515000 | 3.298978000  | -1.314845000 |
| O | 0.262983000  | 3.519252000  | 1.092973000  |
| C | -0.015228000 | 3.234887000  | -2.720199000 |
| C | -0.609124000 | 4.443094000  | -3.411216000 |
| C | 0.887572000  | 4.813896000  | 1.260721000  |
| C | 0.675407000  | 5.259585000  | 2.690222000  |
| H | 1.069047000  | 3.206951000  | -2.821599000 |
| H | -0.425144000 | 2.307056000  | -3.121504000 |
| H | 1.947759000  | 4.725078000  | 1.021829000  |
| H | 0.428448000  | 5.510996000  | 0.557095000  |
| H | 1.124231000  | 6.242562000  | 2.841563000  |
| H | -0.387520000 | 5.327299000  | 2.921134000  |
| H | 1.135881000  | 4.558600000  | 3.385530000  |
| H | -0.184270000 | 5.365566000  | -3.015440000 |
| H | -0.396447000 | 4.398839000  | -4.480669000 |
| H | -1.690415000 | 4.476501000  | -3.277494000 |
| H | 0.962212000  | -0.660569000 | -2.340865000 |
| H | -1.497014000 | -0.689865000 | -2.351466000 |
| O | 1.998657000  | 2.484925000  | -0.584068000 |
| H | 1.782733000  | -0.009787000 | -0.945157000 |
| H | -2.359872000 | 0.136482000  | -1.071723000 |
| H | -1.333773000 | 1.369009000  | 0.392672000  |
| C | -4.631660000 | -1.156698000 | -1.376144000 |

|   |              |              |              |
|---|--------------|--------------|--------------|
| C | -6.442190000 | -1.858546000 | 0.611465000  |
| C | -6.866736000 | -1.098425000 | -0.473686000 |
| C | -5.958677000 | -0.760105000 | -1.470209000 |
| H | -3.954545000 | -0.916939000 | -2.181932000 |
| H | -7.144587000 | -2.140606000 | 1.384432000  |
| H | -7.899453000 | -0.785677000 | -0.549280000 |
| H | -6.286745000 | -0.191976000 | -2.330587000 |
| C | -4.179076000 | -1.905532000 | -0.278798000 |
| C | -5.120610000 | -2.266143000 | 0.699120000  |
| H | -4.797338000 | -2.867831000 | 1.538856000  |
| H | -2.688528000 | -3.268487000 | 0.482176000  |
| C | 2.013263000  | -2.719362000 | -0.436333000 |
| C | 4.354741000  | -3.314434000 | -0.073930000 |
| C | 3.423264000  | -2.485437000 | -0.724501000 |
| C | 5.717838000  | -3.165820000 | -0.269713000 |
| C | 3.924607000  | -1.518106000 | -1.611661000 |
| C | 5.289998000  | -1.375754000 | -1.813367000 |
| C | 6.193021000  | -2.190690000 | -1.140530000 |
| H | 6.410257000  | -3.813228000 | 0.251742000  |
| H | 3.253293000  | -0.885338000 | -2.168542000 |
| H | 5.649560000  | -0.623990000 | -2.503190000 |
| H | 7.256456000  | -2.073021000 | -1.300074000 |
| H | 1.811176000  | -3.664168000 | 0.056480000  |
| H | 3.989512000  | -4.079379000 | 0.599084000  |
| O | -0.429728000 | -3.649880000 | 0.363211000  |

## B10

|   |              |              |              |
|---|--------------|--------------|--------------|
| C | -0.027236000 | -2.857812000 | 0.444705000  |
| C | -1.315060000 | -2.236123000 | 0.005363000  |
| H | -4.744311000 | 3.774715000  | 0.479951000  |
| C | -1.943215000 | 1.916478000  | 0.930027000  |
| C | -3.132159000 | 2.567393000  | 1.229893000  |
| C | -3.818170000 | 3.268053000  | 0.243657000  |
| C | -3.307873000 | 3.308714000  | -1.047642000 |
| C | -2.120159000 | 2.652305000  | -1.347325000 |
| C | -1.423337000 | 1.950921000  | -0.365069000 |
| H | -1.416688000 | 1.371207000  | 1.699433000  |
| H | -3.524514000 | 2.527072000  | 2.237366000  |
| H | -3.834427000 | 3.847704000  | -1.824107000 |
| H | -1.728199000 | 2.688026000  | -2.355834000 |
| N | -0.077121000 | -0.146031000 | -0.256101000 |
| C | -1.252065000 | -0.906247000 | -0.696801000 |
| C | 1.225186000  | -2.221218000 | -0.062183000 |
| C | 1.128039000  | -0.859212000 | -0.695073000 |
| C | 2.357473000  | -2.940967000 | 0.075319000  |
| C | -0.119937000 | 1.255024000  | -0.715269000 |
| P | 1.321345000  | 2.239245000  | -0.051862000 |
| O | 0.874691000  | 3.709602000  | -0.484688000 |
| O | 1.177007000  | 2.283772000  | 1.547433000  |
| C | 1.792640000  | 4.822475000  | -0.343130000 |

|   |              |              |              |
|---|--------------|--------------|--------------|
| C | 1.247160000  | 5.987957000  | -1.136850000 |
| C | 1.907140000  | 1.367118000  | 2.404365000  |
| C | 1.999260000  | 1.978772000  | 3.784308000  |
| H | 1.869214000  | 5.067152000  | 0.717478000  |
| H | 2.774867000  | 4.515285000  | -0.703035000 |
| H | 1.365620000  | 0.420664000  | 2.425629000  |
| H | 2.893295000  | 1.196876000  | 1.974247000  |
| H | 2.548235000  | 2.919979000  | 3.757417000  |
| H | 1.007615000  | 2.168431000  | 4.194627000  |
| H | 2.522594000  | 1.294597000  | 4.453932000  |
| H | 0.257681000  | 6.271656000  | -0.779601000 |
| H | 1.911499000  | 6.847134000  | -1.032694000 |
| H | 1.174788000  | 5.735829000  | -2.194544000 |
| H | -1.224974000 | -1.041889000 | -1.795045000 |
| H | 2.002374000  | -0.273436000 | -0.434605000 |
| O | 2.665366000  | 1.821083000  | -0.522446000 |
| H | -2.150651000 | -0.340639000 | -0.472590000 |
| H | 1.133218000  | -0.947474000 | -1.798885000 |
| H | 0.011545000  | 1.314490000  | -1.808886000 |
| C | 4.183140000  | -1.652850000 | -1.153620000 |
| C | 6.053322000  | -3.429650000 | -0.108942000 |
| C | 6.471132000  | -2.389089000 | -0.931733000 |
| C | 5.530104000  | -1.507958000 | -1.452407000 |
| H | 3.487030000  | -0.952629000 | -1.583961000 |
| H | 6.774772000  | -4.126061000 | 0.297253000  |

|   |              |              |              |
|---|--------------|--------------|--------------|
| H | 7.519660000  | -2.268867000 | -1.169448000 |
| H | 5.844527000  | -0.698426000 | -2.097256000 |
| C | 3.740082000  | -2.690180000 | -0.314737000 |
| C | 4.708731000  | -3.578214000 | 0.187825000  |
| H | 4.387471000  | -4.391925000 | 0.825201000  |
| H | 2.209471000  | -3.885421000 | 0.587651000  |
| C | -2.441167000 | -2.917611000 | 0.287208000  |
| C | -4.817357000 | -3.228149000 | 0.794767000  |
| C | -3.839255000 | -2.630878000 | -0.018136000 |
| C | -6.167786000 | -3.003667000 | 0.581775000  |
| C | -4.277324000 | -1.829169000 | -1.083777000 |
| C | -5.630733000 | -1.614853000 | -1.303997000 |
| C | -6.581061000 | -2.191573000 | -0.469317000 |
| H | -6.899286000 | -3.468197000 | 1.229503000  |
| H | -3.562982000 | -1.398037000 | -1.767822000 |
| H | -5.944375000 | -0.999408000 | -2.136635000 |
| H | -7.634761000 | -2.020312000 | -0.644079000 |
| H | -2.278101000 | -3.821693000 | 0.864163000  |
| H | -4.500292000 | -3.868932000 | 1.607446000  |
| O | -0.005734000 | -3.859789000 | 1.144595000  |

B11

|   |              |              |              |
|---|--------------|--------------|--------------|
| C | -0.234476000 | -2.547547000 | -0.682575000 |
| C | -1.452635000 | -1.944810000 | -0.043263000 |
| H | -4.498256000 | 3.469778000  | -1.302366000 |



|   |              |              |              |
|---|--------------|--------------|--------------|
| C | -1.773351000 | 1.510061000  | -1.775035000 |
| C | -2.945146000 | 2.198420000  | -2.067301000 |
| C | -3.586073000 | 2.933189000  | -1.078278000 |
| C | -3.047057000 | 2.971848000  | 0.203675000  |
| C | -1.873816000 | 2.287269000  | 0.492265000  |
| C | -1.219903000 | 1.547242000  | -0.495892000 |
| H | -1.282986000 | 0.936312000  | -2.550447000 |
| H | -3.357294000 | 2.155108000  | -3.066484000 |
| H | -3.538567000 | 3.541682000  | 0.981192000  |
| H | -1.457527000 | 2.332283000  | 1.487477000  |
| N | 0.011577000  | -0.139216000 | 0.911586000  |
| C | -1.237497000 | -0.899686000 | 1.034622000  |
| C | 1.103011000  | -2.139999000 | -0.141228000 |
| C | 1.134525000  | -1.089406000 | 0.955458000  |
| C | 2.160029000  | -2.833546000 | -0.607408000 |
| C | 0.076175000  | 0.805622000  | -0.225321000 |
| P | 1.460468000  | 2.016572000  | 0.073499000  |
| O | 1.228989000  | 3.026367000  | -1.140612000 |
| O | 1.067557000  | 2.904183000  | 1.355495000  |
| C | 2.206094000  | 4.052365000  | -1.446347000 |
| C | 1.879170000  | 4.622875000  | -2.807717000 |
| C | 1.584072000  | 2.604427000  | 2.676795000  |
| C | 1.581295000  | 3.879246000  | 3.491170000  |
| H | 2.149494000  | 4.818979000  | -0.671779000 |
| H | 3.200694000  | 3.606466000  | -1.425258000 |

|   |              |              |              |
|---|--------------|--------------|--------------|
| H | 0.941673000  | 1.844468000  | 3.123599000  |
| H | 2.588511000  | 2.195207000  | 2.576290000  |
| H | 1.942287000  | 3.671663000  | 4.499773000  |
| H | 2.231919000  | 4.629351000  | 3.041852000  |
| H | 0.576231000  | 4.294250000  | 3.565616000  |
| H | 0.875265000  | 5.046254000  | -2.819610000 |
| H | 2.590278000  | 5.411946000  | -3.056804000 |
| H | 1.939044000  | 3.851332000  | -3.574803000 |
| H | -2.073494000 | -0.217845000 | 1.097681000  |
| H | 1.072910000  | -1.591970000 | 1.926565000  |
| O | 2.823263000  | 1.432622000  | 0.168203000  |
| H | -1.184200000 | -1.404913000 | 2.005123000  |
| H | 2.065613000  | -0.540914000 | 0.948313000  |
| H | 0.365772000  | 0.302089000  | -1.158370000 |
| C | 4.293014000  | -1.594427000 | 0.010582000  |
| C | 5.669224000  | -4.014779000 | -0.084342000 |
| C | 6.347802000  | -2.844646000 | 0.237869000  |
| C | 5.656041000  | -1.638652000 | 0.270531000  |
| H | 3.796857000  | -0.635182000 | 0.005672000  |
| H | 6.198980000  | -4.957107000 | -0.129426000 |
| H | 7.409151000  | -2.870259000 | 0.446565000  |
| H | 6.180627000  | -0.718825000 | 0.492744000  |
| C | 3.590481000  | -2.769139000 | -0.297116000 |
| C | 4.312096000  | -3.972051000 | -0.363820000 |
| H | 3.790235000  | -4.882390000 | -0.630537000 |

|   |              |              |              |
|---|--------------|--------------|--------------|
| H | 1.892829000  | -3.623328000 | -1.302575000 |
| C | -2.635176000 | -2.472584000 | -0.408524000 |
| C | -4.897759000 | -3.254283000 | 0.136006000  |
| C | -4.003489000 | -2.177967000 | 0.030513000  |
| C | -6.209701000 | -3.063372000 | 0.542786000  |
| C | -4.491852000 | -0.891980000 | 0.298999000  |
| C | -5.810195000 | -0.699590000 | 0.687799000  |
| C | -6.671572000 | -1.782550000 | 0.824333000  |
| H | -6.874679000 | -3.912403000 | 0.629344000  |
| H | -3.856814000 | -0.030204000 | 0.161883000  |
| H | -6.167546000 | 0.304003000  | 0.876577000  |
| H | -7.696958000 | -1.628042000 | 1.132492000  |
| H | -2.555855000 | -3.296572000 | -1.110791000 |
| H | -4.547614000 | -4.251643000 | -0.097533000 |
| O | -0.335387000 | -3.339790000 | -1.608207000 |

B12

|   |              |              |              |
|---|--------------|--------------|--------------|
| C | -0.245882000 | -2.552656000 | -0.648468000 |
| C | -1.461280000 | -1.935804000 | -0.021287000 |
| H | -4.451592000 | 3.375615000  | -1.557941000 |
| C | -1.695084000 | 1.428009000  | -1.870562000 |
| C | -2.861816000 | 2.094920000  | -2.225853000 |
| C | -3.543487000 | 2.855172000  | -1.284581000 |
| C | -3.050366000 | 2.939939000  | 0.013417000  |
| C | -1.882371000 | 2.276176000  | 0.365003000  |

|   |              |              |              |
|---|--------------|--------------|--------------|
| C | -1.186282000 | 1.511651000  | -0.574919000 |
| H | -1.173078000 | 0.834687000  | -2.609711000 |
| H | -3.237839000 | 2.015411000  | -3.237009000 |
| H | -3.573173000 | 3.530415000  | 0.754284000  |
| H | -1.500836000 | 2.360540000  | 1.371404000  |
| N | 0.020003000  | -0.136085000 | 0.908587000  |
| C | -1.236021000 | -0.880337000 | 1.043905000  |
| C | 1.086727000  | -2.178335000 | -0.074107000 |
| C | 1.139037000  | -1.088703000 | 0.979462000  |
| C | 2.147457000  | -2.855865000 | -0.559094000 |
| C | 0.108637000  | 0.795639000  | -0.239707000 |
| P | 1.466968000  | 2.025141000  | 0.105024000  |
| O | 1.287684000  | 3.008736000  | -1.140922000 |
| O | 0.994326000  | 2.935442000  | 1.346681000  |
| C | 2.277728000  | 4.028012000  | -1.423452000 |
| C | 2.012826000  | 4.570290000  | -2.809811000 |
| C | 1.465916000  | 2.677649000  | 2.692272000  |
| C | 1.425947000  | 3.974405000  | 3.470596000  |
| H | 2.187177000  | 4.811115000  | -0.668634000 |
| H | 3.270204000  | 3.583172000  | -1.348229000 |
| H | 0.813625000  | 1.925122000  | 3.137824000  |
| H | 2.475751000  | 2.273050000  | 2.638046000  |
| H | 1.751412000  | 3.798037000  | 4.497159000  |
| H | 2.087825000  | 4.716218000  | 3.023910000  |
| H | 0.416454000  | 4.384644000  | 3.497093000  |

|   |              |              |              |
|---|--------------|--------------|--------------|
| H | 1.010790000  | 4.993271000  | -2.875683000 |
| H | 2.735150000  | 5.353919000  | -3.043456000 |
| H | 2.106093000  | 3.782699000  | -3.557055000 |
| H | -1.187004000 | -1.373565000 | 2.021053000  |
| H | 1.107886000  | -1.529468000 | 1.981962000  |
| O | 2.823657000  | 1.453231000  | 0.286796000  |
| H | -2.065544000 | -0.189714000 | 1.099137000  |
| H | 2.073778000  | -0.541703000 | 0.899136000  |
| H | 0.443207000  | 0.284323000  | -1.152381000 |
| C | 4.101051000  | -2.298722000 | 0.966148000  |
| C | 5.831346000  | -3.335695000 | -0.947856000 |
| C | 6.341123000  | -2.812984000 | 0.235936000  |
| C | 5.469480000  | -2.303592000 | 1.191768000  |
| H | 3.449039000  | -1.918781000 | 1.735804000  |
| H | 6.499547000  | -3.744173000 | -1.694226000 |
| H | 7.407789000  | -2.810846000 | 0.416127000  |
| H | 5.857473000  | -1.908299000 | 2.121016000  |
| C | 3.566548000  | -2.807042000 | -0.228367000 |
| C | 4.464044000  | -3.341783000 | -1.168958000 |
| H | 4.070258000  | -3.757738000 | -2.087404000 |
| H | 1.898232000  | -3.555534000 | -1.350022000 |
| C | -2.646199000 | -2.460682000 | -0.382282000 |
| C | -4.911641000 | -3.222193000 | 0.182945000  |
| C | -4.012134000 | -2.152794000 | 0.055249000  |
| C | -6.221450000 | -3.016510000 | 0.589500000  |

|   |              |              |              |
|---|--------------|--------------|--------------|
| C | -4.492370000 | -0.859448000 | 0.301246000  |
| C | -5.808659000 | -0.652626000 | 0.689770000  |
| C | -6.675587000 | -1.728106000 | 0.848344000  |
| H | -6.890841000 | -3.860098000 | 0.693554000  |
| H | -3.852414000 | -0.004258000 | 0.146610000  |
| H | -6.160149000 | 0.356242000  | 0.860719000  |
| H | -7.699365000 | -1.562268000 | 1.155981000  |
| H | -2.572165000 | -3.291013000 | -1.077585000 |
| H | -4.567521000 | -4.225654000 | -0.032817000 |
| O | -0.345435000 | -3.339633000 | -1.579013000 |

### B13

|   |              |              |              |
|---|--------------|--------------|--------------|
| C | -0.123527000 | -2.524475000 | -0.641216000 |
| C | -1.351559000 | -1.976889000 | 0.022011000  |
| H | -4.545654000 | 3.011490000  | -1.796301000 |
| C | -1.632229000 | 1.285018000  | -1.923921000 |
| C | -2.826699000 | 1.850171000  | -2.353684000 |
| C | -3.613543000 | 2.572636000  | -1.466394000 |
| C | -3.195009000 | 2.725349000  | -0.149314000 |
| C | -1.998339000 | 2.164810000  | 0.276697000  |
| C | -1.199137000 | 1.434894000  | -0.606698000 |
| H | -1.028164000 | 0.719954000  | -2.621681000 |
| H | -3.142183000 | 1.720376000  | -3.380345000 |
| H | -3.800950000 | 3.286545000  | 0.549758000  |
| H | -1.674937000 | 2.305319000  | 1.296935000  |

|   |              |              |              |
|---|--------------|--------------|--------------|
| N | 0.062069000  | -0.130024000 | 0.939562000  |
| C | -1.166441000 | -0.914650000 | 1.083419000  |
| C | 1.200871000  | -2.105884000 | -0.078007000 |
| C | 1.215562000  | -1.039237000 | 0.999414000  |
| C | 2.284491000  | -2.718582000 | -0.596648000 |
| C | 0.126034000  | 0.822502000  | -0.193891000 |
| P | 1.380604000  | 2.136673000  | 0.218846000  |
| O | 1.249676000  | 3.056109000  | -1.083549000 |
| O | 0.768938000  | 3.053586000  | 1.393648000  |
| C | 2.166647000  | 4.152937000  | -1.308170000 |
| C | 1.982540000  | 4.638404000  | -2.728525000 |
| C | 1.351193000  | 3.090013000  | 2.720577000  |
| C | 0.435647000  | 2.419848000  | 3.723747000  |
| H | 1.940064000  | 4.942560000  | -0.589075000 |
| H | 3.184252000  | 3.802242000  | -1.133186000 |
| H | 2.328368000  | 2.611352000  | 2.687077000  |
| H | 1.487164000  | 4.145971000  | 2.954567000  |
| H | 0.883766000  | 2.464045000  | 4.718160000  |
| H | -0.533152000 | 2.918591000  | 3.765616000  |
| H | 0.278145000  | 1.375107000  | 3.456884000  |
| H | 0.956970000  | 4.966338000  | -2.895789000 |
| H | 2.650622000  | 5.479267000  | -2.920999000 |
| H | 2.212965000  | 3.846006000  | -3.440128000 |
| H | -1.111075000 | -1.375305000 | 2.076100000  |
| H | 1.199382000  | -1.501054000 | 1.992874000  |

|   |              |              |              |
|---|--------------|--------------|--------------|
| O | 2.748191000  | 1.646886000  | 0.524237000  |
| H | -2.025716000 | -0.251419000 | 1.098312000  |
| H | 2.127851000  | -0.453308000 | 0.936075000  |
| H | 0.549511000  | 0.347304000  | -1.088178000 |
| C | 4.225849000  | -2.116949000 | 0.925680000  |
| C | 5.984054000  | -2.986718000 | -1.045200000 |
| C | 6.480469000  | -2.482004000 | 0.152067000  |
| C | 5.595392000  | -2.056457000 | 1.136101000  |
| H | 3.564121000  | -1.801851000 | 1.716185000  |
| H | 6.663467000  | -3.330789000 | -1.813599000 |
| H | 7.547745000  | -2.429656000 | 0.320702000  |
| H | 5.973529000  | -1.676048000 | 2.075550000  |
| C | 3.703974000  | -2.607623000 | -0.281733000 |
| C | 4.616218000  | -3.058008000 | -1.251673000 |
| H | 4.233372000  | -3.460202000 | -2.180837000 |
| H | 2.058080000  | -3.407191000 | -1.404024000 |
| C | -2.532310000 | -2.466757000 | -0.402328000 |
| C | -4.241463000 | -1.735355000 | 1.322907000  |
| C | -3.895192000 | -2.192963000 | 0.041779000  |
| C | -5.567716000 | -1.512752000 | 1.665493000  |
| C | -4.938237000 | -2.442807000 | -0.865698000 |
| C | -6.260973000 | -2.207313000 | -0.527640000 |
| C | -6.581953000 | -1.737552000 | 0.741716000  |
| H | -5.810917000 | -1.169469000 | 2.662341000  |
| H | -4.693683000 | -2.818711000 | -1.850780000 |



|   |              |              |              |
|---|--------------|--------------|--------------|
| H | -7.043308000 | -2.398205000 | -1.250097000 |
| H | -7.614184000 | -1.561080000 | 1.012891000  |
| H | -2.456218000 | -3.165458000 | -1.228933000 |
| H | -3.477546000 | -1.586127000 | 2.069946000  |
| O | -0.203419000 | -3.298850000 | -1.584444000 |

#### B14

|   |              |              |              |
|---|--------------|--------------|--------------|
| C | -0.121720000 | -2.577722000 | -0.567446000 |
| C | -1.343311000 | -2.015526000 | 0.095052000  |
| H | -4.638305000 | 2.898174000  | -1.758763000 |
| C | -1.720434000 | 1.183344000  | -1.934889000 |
| C | -2.931591000 | 1.730745000  | -2.340429000 |
| C | -3.693245000 | 2.473374000  | -1.447888000 |
| C | -3.232932000 | 2.664070000  | -0.149790000 |
| C | -2.019720000 | 2.121408000  | 0.251529000  |
| C | -1.245503000 | 1.371358000  | -0.637271000 |
| H | -1.136919000 | 0.600853000  | -2.635816000 |
| H | -3.279977000 | 1.570812000  | -3.352083000 |
| H | -3.818954000 | 3.241190000  | 0.553265000  |
| H | -1.664710000 | 2.290890000  | 1.257157000  |
| N | 0.069884000  | -0.129295000 | 0.923220000  |
| C | -1.145741000 | -0.922771000 | 1.122311000  |
| C | 1.207122000  | -2.142420000 | -0.028366000 |
| C | 1.235332000  | -1.022470000 | 0.993597000  |
| C | 2.282362000  | -2.797734000 | -0.511757000 |

|   |              |              |              |
|---|--------------|--------------|--------------|
| C | 0.095431000  | 0.778055000  | -0.250193000 |
| P | 1.347429000  | 2.112960000  | 0.096120000  |
| O | 1.137598000  | 3.050711000  | -1.179918000 |
| O | 0.778610000  | 3.018710000  | 1.301255000  |
| C | 2.054282000  | 4.136987000  | -1.458187000 |
| C | 1.827506000  | 4.592346000  | -2.882206000 |
| C | 1.234239000  | 2.829133000  | 2.663111000  |
| C | 1.146465000  | 4.153819000  | 3.388920000  |
| H | 1.854062000  | 4.942064000  | -0.749012000 |
| H | 3.074569000  | 3.783334000  | -1.307439000 |
| H | 0.594716000  | 2.076932000  | 3.127192000  |
| H | 2.255170000  | 2.450372000  | 2.641086000  |
| H | 1.455724000  | 4.026403000  | 4.427717000  |
| H | 1.798512000  | 4.894258000  | 2.925777000  |
| H | 0.126704000  | 4.538800000  | 3.379890000  |
| H | 0.798440000  | 4.921045000  | -3.024736000 |
| H | 2.492092000  | 5.426286000  | -3.113220000 |
| H | 2.033101000  | 3.784128000  | -3.583539000 |
| H | -2.012007000 | -0.268730000 | 1.140302000  |
| H | 1.253493000  | -1.434702000 | 2.008673000  |
| O | 2.734730000  | 1.641541000  | 0.331388000  |
| H | -1.059356000 | -1.353889000 | 2.125886000  |
| H | 2.138047000  | -0.430257000 | 0.874192000  |
| H | 0.492551000  | 0.272174000  | -1.139794000 |
| C | 4.244070000  | -2.110548000 | 0.950719000  |

|   |              |              |              |
|---|--------------|--------------|--------------|
| C | 5.971584000  | -3.199200000 | -0.936819000 |
| C | 6.485709000  | -2.602791000 | 0.209622000  |
| C | 5.615559000  | -2.067223000 | 1.152452000  |
| H | 3.595231000  | -1.707093000 | 1.710743000  |
| H | 6.638678000  | -3.628334000 | -1.672516000 |
| H | 7.554608000  | -2.563540000 | 0.371365000  |
| H | 6.006975000  | -1.613634000 | 2.053188000  |
| C | 3.704308000  | -2.693903000 | -0.206827000 |
| C | 4.601641000  | -3.251737000 | -1.134309000 |
| H | 4.205173000  | -3.724301000 | -2.023747000 |
| H | 2.044129000  | -3.527869000 | -1.278123000 |
| C | -2.527316000 | -2.521968000 | -0.299275000 |
| C | -4.939748000 | -2.511729000 | -0.730340000 |
| C | -3.884771000 | -2.241912000 | 0.157264000  |
| C | -6.258041000 | -2.272011000 | -0.378208000 |
| C | -4.213593000 | -1.759901000 | 1.433881000  |
| C | -5.535334000 | -1.533126000 | 1.790933000  |
| C | -6.562004000 | -1.778074000 | 0.886171000  |
| H | -7.050162000 | -2.478553000 | -1.085544000 |
| H | -3.438874000 | -1.595530000 | 2.166599000  |
| H | -5.765291000 | -1.171061000 | 2.784271000  |
| H | -7.590707000 | -1.598491000 | 1.168480000  |
| H | -2.459538000 | -3.242902000 | -1.107357000 |
| H | -4.708238000 | -2.906578000 | -1.711155000 |
| O | -0.210089000 | -3.377567000 | -1.488409000 |

## B15

|   |              |              |              |
|---|--------------|--------------|--------------|
| C | -0.125946000 | -2.456980000 | -0.794705000 |
| C | -1.366445000 | -1.932693000 | -0.129694000 |
| H | -4.640135000 | 3.473443000  | -0.932999000 |
| C | -1.886906000 | 1.618009000  | -1.614915000 |
| C | -3.083615000 | 2.292820000  | -1.826105000 |
| C | -3.708750000 | 2.947089000  | -0.772405000 |
| C | -3.129350000 | 2.918095000  | 0.492021000  |
| C | -1.931078000 | 2.247413000  | 0.699877000  |
| C | -1.292793000 | 1.589365000  | -0.353914000 |
| H | -1.408031000 | 1.108039000  | -2.440475000 |
| H | -3.527323000 | 2.301593000  | -2.812586000 |
| H | -3.609050000 | 3.424314000  | 1.319366000  |
| H | -1.482669000 | 2.238170000  | 1.681822000  |
| N | 0.027377000  | -0.127972000 | 0.920611000  |
| C | -1.184961000 | -0.951054000 | 1.011648000  |
| C | 1.194356000  | -2.038480000 | -0.220658000 |
| C | 1.191946000  | -1.026744000 | 0.913276000  |
| C | 2.272846000  | -2.694338000 | -0.691634000 |
| C | 0.030187000  | 0.867731000  | -0.170270000 |
| P | 1.400158000  | 2.104728000  | 0.092297000  |
| O | 1.113908000  | 3.078032000  | -1.142731000 |
| O | 1.020701000  | 2.989717000  | 1.379319000  |
| C | 2.039746000  | 4.139983000  | -1.477883000 |

|   |              |              |              |
|---|--------------|--------------|--------------|
| C | 1.668675000  | 4.675772000  | -2.842270000 |
| C | 1.812258000  | 2.976744000  | 2.594745000  |
| C | 1.060047000  | 2.289461000  | 3.714816000  |
| H | 1.961535000  | 4.916207000  | -0.714291000 |
| H | 3.053494000  | 3.738731000  | -1.466730000 |
| H | 2.762658000  | 2.487595000  | 2.388243000  |
| H | 2.002946000  | 4.023333000  | 2.831838000  |
| H | 1.664851000  | 2.299961000  | 4.623411000  |
| H | 0.120224000  | 2.800052000  | 3.926479000  |
| H | 0.840689000  | 1.254622000  | 3.453568000  |
| H | 0.647137000  | 5.054816000  | -2.844860000 |
| H | 2.340832000  | 5.491165000  | -3.113737000 |
| H | 1.751062000  | 3.895933000  | -3.598803000 |
| H | -2.049588000 | -0.313576000 | 1.129424000  |
| H | 1.168708000  | -1.567221000 | 1.865547000  |
| O | 2.780102000  | 1.556265000  | 0.156367000  |
| H | -1.093159000 | -1.514419000 | 1.946524000  |
| H | 2.096490000  | -0.435566000 | 0.913883000  |
| H | 0.290445000  | 0.414263000  | -1.137414000 |
| C | 4.443026000  | -3.794095000 | -0.415889000 |
| C | 5.721568000  | -1.442979000 | 0.285613000  |
| C | 6.439353000  | -2.633609000 | 0.251956000  |
| C | 5.793738000  | -3.812550000 | -0.104190000 |
| H | 3.947151000  | -4.711069000 | -0.708278000 |
| H | 6.221359000  | -0.516014000 | 0.533911000  |

|   |              |              |              |
|---|--------------|--------------|--------------|
| H | 7.495619000  | -2.640282000 | 0.486303000  |
| H | 6.344361000  | -4.742798000 | -0.150189000 |
| C | 3.694831000  | -2.607795000 | -0.348351000 |
| C | 4.364468000  | -1.423497000 | -0.006561000 |
| H | 3.846625000  | -0.475740000 | -0.010129000 |
| H | 2.036227000  | -3.466445000 | -1.417012000 |
| C | -2.530015000 | -2.471573000 | -0.537792000 |
| C | -4.773195000 | -3.360318000 | -0.095067000 |
| C | -3.910696000 | -2.253071000 | -0.094085000 |
| C | -6.093905000 | -3.245420000 | 0.311594000  |
| C | -4.440929000 | -1.011055000 | 0.281546000  |
| C | -5.767723000 | -0.893320000 | 0.670872000  |
| C | -6.596941000 | -2.009151000 | 0.700950000  |
| H | -6.733397000 | -4.118109000 | 0.314412000  |
| H | -3.832229000 | -0.121634000 | 0.228738000  |
| H | -6.156970000 | 0.078434000  | 0.944108000  |
| H | -7.629123000 | -1.913118000 | 1.010186000  |
| H | -2.418942000 | -3.245494000 | -1.290920000 |
| H | -4.390624000 | -4.322157000 | -0.411860000 |
| O | -0.194459000 | -3.198352000 | -1.764375000 |

B16

|   |              |              |              |
|---|--------------|--------------|--------------|
| C | -0.215913000 | -2.470507000 | -0.746072000 |
| C | -1.442126000 | -1.887723000 | -0.107754000 |
| H | -4.408385000 | 3.391480000  | -1.644076000 |

|   |              |              |              |
|---|--------------|--------------|--------------|
| C | -1.612801000 | 1.489569000  | -1.881234000 |
| C | -2.776896000 | 2.142306000  | -2.269823000 |
| C | -3.502338000 | 2.881759000  | -1.344847000 |
| C | -3.055536000 | 2.959668000  | -0.029865000 |
| C | -1.890428000 | 2.309498000  | 0.355489000  |
| C | -1.150268000 | 1.566335000  | -0.567729000 |
| H | -1.056558000 | 0.912635000  | -2.608273000 |
| H | -3.116341000 | 2.068314000  | -3.294248000 |
| H | -3.612540000 | 3.534231000  | 0.698514000  |
| H | -1.544814000 | 2.388849000  | 1.374747000  |
| N | 0.021941000  | -0.118593000 | 0.907615000  |
| C | -1.238346000 | -0.861530000 | 0.990576000  |
| C | 1.107570000  | -2.115344000 | -0.139088000 |
| C | 1.137864000  | -1.075126000 | 0.963699000  |
| C | 2.179201000  | -2.761974000 | -0.641716000 |
| C | 0.140999000  | 0.860744000  | -0.196382000 |
| P | 1.474684000  | 2.090351000  | 0.232546000  |
| O | 1.374917000  | 3.048828000  | -1.044234000 |
| O | 0.929384000  | 3.006631000  | 1.438943000  |
| C | 2.359830000  | 4.086179000  | -1.266071000 |
| C | 2.168488000  | 4.626688000  | -2.665375000 |
| C | 1.528408000  | 2.979368000  | 2.758847000  |
| C | 0.573211000  | 2.370504000  | 3.764048000  |
| H | 2.210925000  | 4.867103000  | -0.517773000 |
| H | 3.354591000  | 3.659967000  | -1.133059000 |

|   |              |              |              |
|---|--------------|--------------|--------------|
| H | 2.464647000  | 2.426227000  | 2.707399000  |
| H | 1.750526000  | 4.017816000  | 3.005131000  |
| H | 1.034857000  | 2.364510000  | 4.753188000  |
| H | -0.351447000 | 2.945187000  | 3.825184000  |
| H | 0.328317000  | 1.345567000  | 3.486581000  |
| H | 1.164703000  | 5.031751000  | -2.790515000 |
| H | 2.889313000  | 5.423424000  | -2.855152000 |
| H | 2.320036000  | 3.842090000  | -3.406199000 |
| H | -2.065652000 | -0.168272000 | 1.043429000  |
| H | 1.082107000  | -1.560605000 | 1.944246000  |
| O | 2.817881000  | 1.519930000  | 0.502369000  |
| H | -1.216921000 | -1.380949000 | 1.955183000  |
| H | 2.074242000  | -0.526120000 | 0.932222000  |
| H | 0.523306000  | 0.389189000  | -1.111582000 |
| C | 4.104543000  | -2.271040000 | 0.940166000  |
| C | 5.873818000  | -3.181121000 | -1.002562000 |
| C | 6.360580000  | -2.719260000 | 0.215802000  |
| C | 5.469595000  | -2.273495000 | 1.185451000  |
| H | 3.437014000  | -1.942033000 | 1.720008000  |
| H | 6.557302000  | -3.540522000 | -1.760257000 |
| H | 7.424487000  | -2.715570000 | 0.411603000  |
| H | 5.839596000  | -1.926425000 | 2.140919000  |
| C | 3.593227000  | -2.717572000 | -0.288714000 |
| C | 4.509938000  | -3.189930000 | -1.243948000 |
| H | 4.134067000  | -3.559001000 | -2.189563000 |



|   |              |              |              |
|---|--------------|--------------|--------------|
| H | 1.946111000  | -3.425072000 | -1.468307000 |
| C | -2.618384000 | -2.417651000 | -0.489493000 |
| C | -4.875704000 | -3.227036000 | 0.039757000  |
| C | -3.989418000 | -2.142497000 | -0.046282000 |
| C | -6.188507000 | -3.053059000 | 0.451428000  |
| C | -4.486597000 | -0.865376000 | 0.246753000  |
| C | -5.805762000 | -0.689589000 | 0.640544000  |
| C | -6.659153000 | -1.781114000 | 0.757709000  |
| H | -6.847335000 | -3.908272000 | 0.522947000  |
| H | -3.857443000 | 0.003054000  | 0.125216000  |
| H | -6.170181000 | 0.307644000  | 0.848663000  |
| H | -7.685151000 | -1.639871000 | 1.070173000  |
| H | -2.531040000 | -3.225181000 | -1.209596000 |
| H | -4.518602000 | -4.217372000 | -0.212402000 |
| O | -0.299952000 | -3.217758000 | -1.710296000 |

B17

|   |              |              |              |
|---|--------------|--------------|--------------|
| C | -0.555666000 | 2.833527000  | -0.366458000 |
| C | 0.793028000  | 2.223322000  | -0.128587000 |
| H | -4.020793000 | -4.296828000 | -1.756831000 |
| C | -2.022979000 | -3.144239000 | 0.727052000  |
| C | -2.986319000 | -3.912618000 | 0.086562000  |
| C | -3.269749000 | -3.699229000 | -1.257545000 |
| C | -2.583458000 | -2.711585000 | -1.954950000 |
| C | -1.618935000 | -1.943336000 | -1.313384000 |

|   |              |              |              |
|---|--------------|--------------|--------------|
| C | -1.330338000 | -2.152254000 | 0.035351000  |
| H | -1.798963000 | -3.324615000 | 1.770104000  |
| H | -3.514909000 | -4.678644000 | 0.638052000  |
| H | -2.800139000 | -2.535865000 | -3.000485000 |
| H | -1.096733000 | -1.161078000 | -1.845427000 |
| N | -0.285592000 | 0.063298000  | 0.276113000  |
| C | 0.865728000  | 0.903278000  | 0.601395000  |
| C | -1.748927000 | 2.031225000  | 0.051351000  |
| C | -1.503083000 | 0.724078000  | 0.757909000  |
| C | -2.955083000 | 2.581726000  | -0.168736000 |
| C | -0.257025000 | -1.328021000 | 0.737864000  |
| P | 1.334572000  | -2.272866000 | 0.572488000  |
| O | 1.979496000  | -1.845596000 | -0.840117000 |
| O | 2.258007000  | -1.556655000 | 1.675619000  |
| C | 2.371630000  | -2.828037000 | -1.837788000 |
| C | 1.999323000  | -2.317948000 | -3.211934000 |
| C | 3.516764000  | -2.153971000 | 2.075355000  |
| C | 3.996839000  | -1.454390000 | 3.326971000  |
| H | 3.450551000  | -2.964614000 | -1.748905000 |
| H | 1.886005000  | -3.774170000 | -1.606798000 |
| H | 3.358811000  | -3.219015000 | 2.243975000  |
| H | 4.231582000  | -2.030281000 | 1.258992000  |
| H | 4.948673000  | -1.882070000 | 3.645554000  |
| H | 4.141768000  | -0.389637000 | 3.147037000  |
| H | 3.277870000  | -1.575862000 | 4.136749000  |

|   |              |              |              |
|---|--------------|--------------|--------------|
| H | 2.469484000  | -1.356216000 | -3.416500000 |
| H | 2.335430000  | -3.030250000 | -3.967454000 |
| H | 0.920220000  | -2.203894000 | -3.306050000 |
| H | 0.912782000  | 1.100758000  | 1.688328000  |
| H | -1.419057000 | 0.915737000  | 1.845157000  |
| O | 1.184293000  | -3.733336000 | 0.752213000  |
| H | 1.777895000  | 0.386259000  | 0.349389000  |
| H | -2.342916000 | 0.053634000  | 0.631625000  |
| H | -0.436698000 | -1.393663000 | 1.824445000  |
| C | -4.708001000 | 0.753147000  | -0.124015000 |
| C | -6.559224000 | 2.574706000  | 0.864993000  |
| C | -6.938178000 | 1.255223000  | 0.644580000  |
| C | -6.010599000 | 0.351680000  | 0.138212000  |
| H | -4.015849000 | 0.042472000  | -0.551909000 |
| H | -7.276638000 | 3.290207000  | 1.244296000  |
| H | -7.951113000 | 0.937073000  | 0.851754000  |
| H | -6.302475000 | -0.670711000 | -0.061463000 |
| C | -4.303999000 | 2.074243000  | 0.111155000  |
| C | -5.262693000 | 2.980960000  | 0.585983000  |
| H | -4.976712000 | 4.012842000  | 0.745123000  |
| H | -2.919985000 | 3.583868000  | -0.584281000 |
| C | 1.851443000  | 2.948674000  | -0.529267000 |
| C | 4.153611000  | 3.744056000  | -0.199814000 |
| C | 3.291683000  | 2.671876000  | -0.473726000 |
| C | 5.528399000  | 3.567792000  | -0.149813000 |

|   |              |             |              |
|---|--------------|-------------|--------------|
| C | 3.864333000  | 1.421393000 | -0.744129000 |
| C | 5.241808000  | 1.251066000 | -0.713520000 |
| C | 6.079597000  | 2.317421000 | -0.405674000 |
| H | 6.170228000  | 4.408949000 | 0.076008000  |
| H | 3.236863000  | 0.585391000 | -1.015912000 |
| H | 5.664169000  | 0.281278000 | -0.942071000 |
| H | 7.152131000  | 2.178677000 | -0.380922000 |
| H | 1.594274000  | 3.923692000 | -0.930999000 |
| H | 3.730936000  | 4.723859000 | -0.017776000 |
| O | -0.677510000 | 3.926840000 | -0.897122000 |

**Table S14.** Structural information in the form of XYZ for compound 2.

A1

|   |              |              |              |
|---|--------------|--------------|--------------|
| C | 0.987993000  | -2.702900000 | -0.727627000 |
| C | 2.112817000  | -1.744512000 | -0.473868000 |
| F | 0.908986000  | 5.616873000  | -2.747394000 |
| C | 1.378386000  | 3.336120000  | 0.014142000  |
| C | 1.578890000  | 4.416491000  | -0.836082000 |
| C | 0.724145000  | 4.575784000  | -1.910183000 |
| C | -0.320073000 | 3.700066000  | -2.148450000 |
| C | -0.510350000 | 2.632141000  | -1.281759000 |
| C | 0.340088000  | 2.425487000  | -0.191066000 |
| H | 2.039996000  | 3.206512000  | 0.860914000  |
| H | 2.378266000  | 5.125179000  | -0.673437000 |
| H | -0.973500000 | 3.863454000  | -2.993579000 |
| H | -1.344191000 | 1.969605000  | -1.451140000 |

|   |              |              |              |
|---|--------------|--------------|--------------|
| N | 0.427086000  | -0.105960000 | 0.220513000  |
| C | 1.793268000  | -0.286553000 | -0.258975000 |
| C | -0.391384000 | -2.130160000 | -0.843138000 |
| C | -0.525955000 | -0.630185000 | -0.754231000 |
| C | -1.387691000 | -2.995779000 | -1.090681000 |
| C | 0.195483000  | 1.238738000  | 0.758490000  |
| P | -1.305575000 | 1.362265000  | 1.844042000  |
| O | -2.536589000 | 1.566536000  | 0.838360000  |
| O | -1.615834000 | -0.118535000 | 2.389568000  |
| C | -3.796044000 | 2.100630000  | 1.328436000  |
| C | -4.592181000 | 2.607379000  | 0.147530000  |
| C | -0.825203000 | -0.697495000 | 3.457809000  |
| C | -1.616544000 | -1.825732000 | 4.080560000  |
| H | -3.579619000 | 2.895784000  | 2.040783000  |
| H | -4.324163000 | 1.300270000  | 1.849477000  |
| H | 0.105764000  | -1.064502000 | 3.022777000  |
| H | -0.599013000 | 0.080644000  | 4.187347000  |
| H | -1.031517000 | -2.289701000 | 4.876042000  |
| H | -2.547616000 | -1.456042000 | 4.509630000  |
| H | -1.852172000 | -2.589207000 | 3.339717000  |
| H | -4.062229000 | 3.412112000  | -0.361148000 |
| H | -4.783236000 | 1.808103000  | -0.568419000 |
| H | -5.551800000 | 2.994931000  | 0.493107000  |
| H | 1.961373000  | 0.280962000  | -1.191291000 |
| H | -1.531843000 | -0.345312000 | -0.472245000 |

|   |              |              |              |
|---|--------------|--------------|--------------|
| O | -1.138854000 | 2.393536000  | 2.891066000  |
| H | 2.477785000  | 0.126172000  | 0.483417000  |
| H | -0.345011000 | -0.203576000 | -1.756417000 |
| H | 0.969674000  | 1.372396000  | 1.519317000  |
| C | -3.513204000 | -3.463279000 | -2.248348000 |
| C | -4.944662000 | -1.798077000 | -0.560151000 |
| C | -5.601418000 | -2.467413000 | -1.586721000 |
| C | -4.879153000 | -3.304217000 | -2.430238000 |
| H | -2.958324000 | -4.128280000 | -2.897791000 |
| H | -5.504701000 | -1.169660000 | 0.119825000  |
| H | -6.668797000 | -2.350720000 | -1.718187000 |
| H | -5.382014000 | -3.842192000 | -3.222831000 |
| C | -2.830388000 | -2.766674000 | -1.241290000 |
| C | -3.574140000 | -1.941206000 | -0.388065000 |
| H | -3.088165000 | -1.441150000 | 0.437284000  |
| H | -1.066505000 | -4.023072000 | -1.231550000 |
| C | 3.349618000  | -2.275478000 | -0.421841000 |
| C | 4.956581000  | -0.310389000 | -0.455834000 |
| C | 4.651446000  | -1.656342000 | -0.196324000 |
| C | 6.227444000  | 0.191176000  | -0.211562000 |
| C | 5.682810000  | -2.477411000 | 0.290605000  |
| C | 6.946721000  | -1.972127000 | 0.547984000  |
| C | 7.224253000  | -0.631654000 | 0.300250000  |
| H | 6.442254000  | 1.228776000  | -0.430153000 |
| H | 5.474524000  | -3.523574000 | 0.474041000  |

|   |             |              |              |
|---|-------------|--------------|--------------|
| H | 7.718811000 | -2.624506000 | 0.933399000  |
| H | 8.212272000 | -0.235198000 | 0.491676000  |
| H | 3.373454000 | -3.354167000 | -0.532518000 |
| H | 4.213134000 | 0.341844000  | -0.886852000 |
| O | 1.190142000 | -3.902610000 | -0.837132000 |

## A2

|   |              |              |              |
|---|--------------|--------------|--------------|
| C | 0.417842000  | -3.099844000 | 0.279511000  |
| C | 1.600258000  | -2.238335000 | -0.028352000 |
| F | -5.042437000 | 3.034471000  | 1.438742000  |
| C | -1.806172000 | 1.432438000  | 1.252159000  |
| C | -2.995193000 | 1.918716000  | 1.778320000  |
| C | -3.882255000 | 2.563813000  | 0.933761000  |
| C | -3.620356000 | 2.731615000  | -0.413076000 |
| C | -2.425478000 | 2.236723000  | -0.921827000 |
| C | -1.505597000 | 1.587407000  | -0.101834000 |
| H | -1.103203000 | 0.918352000  | 1.890481000  |
| H | -3.238953000 | 1.803537000  | 2.824879000  |
| H | -4.341450000 | 3.231647000  | -1.043622000 |
| H | -2.211884000 | 2.357555000  | -1.975759000 |
| N | 0.045110000  | -0.322935000 | -0.226394000 |
| C | 1.393237000  | -0.820799000 | -0.496745000 |
| C | -0.924222000 | -2.561552000 | -0.105231000 |
| C | -0.939879000 | -1.236551000 | -0.816604000 |
| C | -1.991071000 | -3.337568000 | 0.144705000  |

|   |              |              |              |
|---|--------------|--------------|--------------|
| C | -0.199801000 | 1.055607000  | -0.669272000 |
| P | 1.199030000  | 2.234073000  | -0.335025000 |
| O | 0.533388000  | 3.661624000  | -0.652974000 |
| O | 1.317803000  | 2.170563000  | 1.259509000  |
| C | 1.159421000  | 4.640163000  | -1.521241000 |
| C | 0.189380000  | 5.057338000  | -2.605677000 |
| C | 2.344200000  | 2.918074000  | 1.957750000  |
| C | 2.343154000  | 2.485844000  | 3.406448000  |
| H | 1.426274000  | 5.488735000  | -0.890209000 |
| H | 2.070391000  | 4.212583000  | -1.936536000 |
| H | 2.117972000  | 3.982327000  | 1.864664000  |
| H | 3.305135000  | 2.721603000  | 1.481537000  |
| H | 2.563735000  | 1.422509000  | 3.493151000  |
| H | 3.104004000  | 3.041347000  | 3.956650000  |
| H | 1.375315000  | 2.678720000  | 3.868431000  |
| H | -0.736467000 | 5.438766000  | -2.175871000 |
| H | 0.636561000  | 5.845723000  | -3.213604000 |
| H | -0.049938000 | 4.219804000  | -3.261322000 |
| H | 1.626006000  | -0.746827000 | -1.574141000 |
| H | -0.714033000 | -1.395028000 | -1.888635000 |
| O | 2.459919000  | 2.006995000  | -1.084000000 |
| H | 2.107771000  | -0.182111000 | 0.013559000  |
| H | -1.922340000 | -0.783262000 | -0.774264000 |
| H | -0.257820000 | 1.111679000  | -1.771515000 |
| C | -4.062292000 | -1.886748000 | 0.163240000  |



|   |              |              |              |
|---|--------------|--------------|--------------|
| C | -5.554328000 | -4.017030000 | -0.812954000 |
| C | -6.173963000 | -2.797962000 | -0.560763000 |
| C | -5.424325000 | -1.738918000 | -0.061189000 |
| H | -3.504851000 | -1.063972000 | 0.586972000  |
| H | -6.131061000 | -4.852333000 | -1.187412000 |
| H | -7.234465000 | -2.678741000 | -0.737580000 |
| H | -5.901987000 | -0.794831000 | 0.164625000  |
| C | -3.419050000 | -3.102318000 | -0.103175000 |
| C | -4.196950000 | -4.170462000 | -0.571767000 |
| H | -3.722739000 | -5.126058000 | -0.755580000 |
| H | -1.749579000 | -4.308559000 | 0.565890000  |
| C | 2.810607000  | -2.812164000 | 0.134366000  |
| C | 4.530301000  | -1.113354000 | -0.687520000 |
| C | 4.169210000  | -2.322340000 | -0.064995000 |
| C | 5.864764000  | -0.753286000 | -0.813814000 |
| C | 5.208541000  | -3.148170000 | 0.402783000  |
| C | 6.538546000  | -2.783480000 | 0.279067000  |
| C | 6.873382000  | -1.578947000 | -0.330756000 |
| H | 6.114010000  | 0.181728000  | -1.297383000 |
| H | 4.952740000  | -4.088436000 | 0.873990000  |
| H | 7.313791000  | -3.438485000 | 0.653806000  |
| H | 7.910771000  | -1.289604000 | -0.433681000 |
| H | 2.760198000  | -3.831543000 | 0.500809000  |
| H | 3.787762000  | -0.443603000 | -1.088643000 |
| O | 0.538589000  | -4.194367000 | 0.809448000  |

A3

|   |              |              |              |
|---|--------------|--------------|--------------|
| C | 0.970653000  | -2.795429000 | -0.010958000 |
| C | -0.431897000 | -2.352437000 | -0.283634000 |
| F | -1.161827000 | 3.893020000  | -4.743879000 |
| C | -1.619635000 | 2.065513000  | -1.657061000 |
| C | -1.907658000 | 2.674140000  | -2.872012000 |
| C | -0.886376000 | 3.299898000  | -3.563849000 |
| C | 0.406665000  | 3.343095000  | -3.076887000 |
| C | 0.675780000  | 2.729961000  | -1.859550000 |
| C | -0.323153000 | 2.077789000  | -1.134073000 |
| H | -2.418434000 | 1.597182000  | -1.098645000 |
| H | -2.908769000 | 2.674295000  | -3.279175000 |
| H | 1.177427000  | 3.850247000  | -3.639415000 |
| H | 1.683982000  | 2.768430000  | -1.467540000 |
| N | 0.331235000  | -0.059456000 | 0.102329000  |
| C | -0.696709000 | -0.887707000 | -0.530049000 |
| C | 2.054377000  | -1.767587000 | -0.147115000 |
| C | 1.641116000  | -0.354231000 | -0.472732000 |
| C | 3.320799000  | -2.200822000 | -0.048603000 |
| C | 0.038790000  | 1.383888000  | 0.172931000  |
| P | -1.162715000 | 1.677163000  | 1.543685000  |
| O | -0.385902000 | 1.241978000  | 2.878782000  |
| O | -1.115378000 | 3.274314000  | 1.609394000  |
| C | -0.695076000 | 0.023005000  | 3.604864000  |

|   |              |              |              |
|---|--------------|--------------|--------------|
| C | 0.586498000  | -0.722073000 | 3.904264000  |
| C | -2.110814000 | 4.037742000  | 2.336231000  |
| C | -1.527307000 | 4.594896000  | 3.618463000  |
| H | -1.199370000 | 0.325900000  | 4.523239000  |
| H | -1.389560000 | -0.578517000 | 3.021483000  |
| H | -2.414091000 | 4.837290000  | 1.661517000  |
| H | -2.978916000 | 3.406054000  | 2.525391000  |
| H | -2.271314000 | 5.214917000  | 4.122014000  |
| H | -1.230344000 | 3.794650000  | 4.295169000  |
| H | -0.652986000 | 5.210964000  | 3.408970000  |
| H | 1.274180000  | -0.098263000 | 4.475699000  |
| H | 0.364466000  | -1.614106000 | 4.492435000  |
| H | 1.076001000  | -1.032022000 | 2.982423000  |
| H | -0.740355000 | -0.691506000 | -1.615186000 |
| H | 2.363730000  | 0.355688000  | -0.083364000 |
| O | -2.504630000 | 1.060939000  | 1.393207000  |
| H | -1.664567000 | -0.618352000 | -0.112630000 |
| H | 1.634623000  | -0.223680000 | -1.569613000 |
| H | 0.950683000  | 1.850475000  | 0.549481000  |
| C | 4.818546000  | -0.256896000 | 0.551893000  |
| C | 6.832580000  | -1.312591000 | -1.041208000 |
| C | 7.046808000  | -0.120990000 | -0.357398000 |
| C | 6.039121000  | 0.396787000  | 0.448370000  |
| H | 4.059288000  | 0.137704000  | 1.212463000  |
| H | 7.615219000  | -1.731946000 | -1.659324000 |

|   |              |              |              |
|---|--------------|--------------|--------------|
| H | 7.995711000  | 0.391643000  | -0.439641000 |
| H | 6.206807000  | 1.308169000  | 1.006962000  |
| C | 4.580006000  | -1.447701000 | -0.145302000 |
| C | 5.619058000  | -1.974804000 | -0.923803000 |
| H | 5.462969000  | -2.908795000 | -1.448189000 |
| H | 3.426146000  | -3.273024000 | 0.083579000  |
| C | -1.371351000 | -3.319150000 | -0.277809000 |
| C | -3.581787000 | -4.336058000 | -0.026125000 |
| C | -2.808033000 | -3.272933000 | -0.522706000 |
| C | -4.955381000 | -4.372458000 | -0.201377000 |
| C | -3.469816000 | -2.264239000 | -1.240890000 |
| C | -4.843813000 | -2.308464000 | -1.426996000 |
| C | -5.593911000 | -3.354551000 | -0.902092000 |
| H | -5.527922000 | -5.197327000 | 0.201263000  |
| H | -2.910369000 | -1.456242000 | -1.684495000 |
| H | -5.331223000 | -1.522690000 | -1.988461000 |
| H | -6.665555000 | -3.381809000 | -1.046866000 |
| H | -0.990196000 | -4.301499000 | -0.020485000 |
| H | -3.087082000 | -5.135044000 | 0.511008000  |
| O | 1.233394000  | -3.948580000 | 0.295435000  |

A4

|   |              |              |              |
|---|--------------|--------------|--------------|
| C | 0.629713000  | -2.969134000 | 0.336549000  |
| C | 1.762035000  | -2.069846000 | -0.043648000 |
| F | -5.385620000 | 2.759516000  | 0.779843000  |

|   |              |              |              |
|---|--------------|--------------|--------------|
| C | -2.034933000 | 1.421869000  | 1.023900000  |
| C | -3.311402000 | 1.825363000  | 1.392528000  |
| C | -4.140536000 | 2.372817000  | 0.429152000  |
| C | -3.735283000 | 2.526276000  | -0.883519000 |
| C | -2.455098000 | 2.115349000  | -1.233923000 |
| C | -1.590600000 | 1.561307000  | -0.291910000 |
| H | -1.376986000 | 0.987282000  | 1.761227000  |
| H | -3.665600000 | 1.720237000  | 2.408135000  |
| H | -4.412651000 | 2.951723000  | -1.609996000 |
| H | -2.127342000 | 2.229595000  | -2.258748000 |
| N | 0.107278000  | -0.238052000 | -0.229689000 |
| C | 1.469850000  | -0.677289000 | -0.539631000 |
| C | -0.742212000 | -2.521573000 | -0.057638000 |
| C | -0.836690000 | -1.213283000 | -0.794222000 |
| C | -1.756508000 | -3.363626000 | 0.201509000  |
| C | -0.193671000 | 1.124030000  | -0.697805000 |
| P | 1.063518000  | 2.389147000  | -0.150561000 |
| O | 0.313891000  | 3.712780000  | -0.645708000 |
| O | 0.970376000  | 2.451922000  | 1.450402000  |
| C | 0.994786000  | 4.991407000  | -0.626344000 |
| C | 0.181843000  | 5.971801000  | -1.441385000 |
| C | 2.099201000  | 2.193526000  | 2.325639000  |
| C | 1.760556000  | 1.072781000  | 3.284543000  |
| H | 1.079494000  | 5.318494000  | 0.411810000  |
| H | 1.996987000  | 4.862288000  | -1.035518000 |

|   |              |              |              |
|---|--------------|--------------|--------------|
| H | 2.971772000  | 1.960405000  | 1.717738000  |
| H | 2.290422000  | 3.124355000  | 2.860201000  |
| H | 2.599572000  | 0.903975000  | 3.961696000  |
| H | 0.884580000  | 1.323347000  | 3.882875000  |
| H | 1.560219000  | 0.145274000  | 2.749181000  |
| H | -0.824120000 | 6.073471000  | -1.035349000 |
| H | 0.661662000  | 6.951462000  | -1.425037000 |
| H | 0.106423000  | 5.643944000  | -2.477884000 |
| H | 1.648935000  | -0.623290000 | -1.629892000 |
| H | -0.610325000 | -1.379373000 | -1.864602000 |
| O | 2.445270000  | 2.228872000  | -0.668421000 |
| H | 2.174582000  | 0.012907000  | -0.088623000 |
| H | -1.840743000 | -0.813792000 | -0.753205000 |
| H | -0.122452000 | 1.187207000  | -1.797453000 |
| C | -3.889178000 | -4.395397000 | -0.463874000 |
| C | -5.296542000 | -2.033812000 | -0.118594000 |
| C | -5.961478000 | -3.175123000 | -0.552886000 |
| C | -5.251561000 | -4.358714000 | -0.721812000 |
| H | -3.344116000 | -5.323149000 | -0.582422000 |
| H | -5.844022000 | -1.114666000 | 0.042404000  |
| H | -7.025924000 | -3.146009000 | -0.743216000 |
| H | -5.761561000 | -5.256814000 | -1.044063000 |
| C | -3.195458000 | -3.244817000 | -0.061541000 |
| C | -3.929985000 | -2.066042000 | 0.122407000  |
| H | -3.441622000 | -1.177895000 | 0.495102000  |

|   |              |              |              |
|---|--------------|--------------|--------------|
| H | -1.449342000 | -4.306310000 | 0.643668000  |
| C | 2.999714000  | -2.595236000 | 0.072365000  |
| C | 4.618833000  | -0.845440000 | -0.843456000 |
| C | 4.329180000  | -2.070562000 | -0.215241000 |
| C | 5.932449000  | -0.453878000 | -1.060271000 |
| C | 5.417125000  | -2.877447000 | 0.167392000  |
| C | 6.726628000  | -2.482551000 | -0.048226000 |
| C | 6.990723000  | -1.264002000 | -0.664568000 |
| H | 6.126532000  | 0.494198000  | -1.543574000 |
| H | 5.216604000  | -3.828083000 | 0.644448000  |
| H | 7.540675000  | -3.124555000 | 0.260935000  |
| H | 8.011456000  | -0.950351000 | -0.838162000 |
| H | 3.003006000  | -3.606488000 | 0.463983000  |
| H | 3.834405000  | -0.184287000 | -1.172126000 |
| O | 0.815131000  | -4.025337000 | 0.922625000  |

A5

|   |              |              |              |
|---|--------------|--------------|--------------|
| C | 0.820522000  | -2.285730000 | 0.292986000  |
| C | -0.571673000 | -2.060445000 | -0.213142000 |
| F | -4.999190000 | 3.534487000  | -1.718773000 |
| C | -1.546291000 | 2.548567000  | -2.101045000 |
| C | -2.789050000 | 3.089936000  | -2.397953000 |
| C | -3.787327000 | 3.009301000  | -1.442759000 |
| C | -3.578860000 | 2.408485000  | -0.215995000 |
| C | -2.326281000 | 1.873185000  | 0.063167000  |

|   |              |              |              |
|---|--------------|--------------|--------------|
| C | -1.293556000 | 1.937048000  | -0.871256000 |
| H | -0.757945000 | 2.597306000  | -2.841051000 |
| H | -2.988242000 | 3.569392000  | -3.345695000 |
| H | -4.383797000 | 2.363269000  | 0.503397000  |
| H | -2.157947000 | 1.405024000  | 1.021879000  |
| N | 0.244434000  | 0.047145000  | -1.276898000 |
| C | -0.790092000 | -0.968041000 | -1.237777000 |
| C | 1.935112000  | -1.558800000 | -0.392045000 |
| C | 1.572818000  | -0.515929000 | -1.437307000 |
| C | 3.184178000  | -1.959765000 | -0.105379000 |
| C | 0.088373000  | 1.348800000  | -0.638755000 |
| P | 0.766184000  | 1.527776000  | 1.093028000  |
| O | 0.237084000  | 2.952936000  | 1.630343000  |
| O | -0.051790000 | 0.454317000  | 1.956242000  |
| C | 1.129285000  | 4.035795000  | 1.992548000  |
| C | 1.041412000  | 5.157590000  | 0.978855000  |
| C | 0.378179000  | 0.130726000  | 3.309748000  |
| C | -0.443652000 | -1.033561000 | 3.812384000  |
| H | 0.801716000  | 4.371896000  | 2.976273000  |
| H | 2.142781000  | 3.646288000  | 2.072841000  |
| H | 1.439522000  | -0.112240000 | 3.281224000  |
| H | 0.235257000  | 1.016748000  | 3.931679000  |
| H | -0.154289000 | -1.260677000 | 4.839937000  |
| H | -1.507185000 | -0.794447000 | 3.802077000  |
| H | -0.269106000 | -1.918288000 | 3.202781000  |



|   |              |              |              |
|---|--------------|--------------|--------------|
| H | 0.014233000  | 5.504398000  | 0.869229000  |
| H | 1.656542000  | 5.998340000  | 1.304776000  |
| H | 1.403611000  | 4.833168000  | 0.002864000  |
| H | -0.835232000 | -1.420504000 | -2.239224000 |
| H | 2.302817000  | 0.286104000  | -1.451608000 |
| O | 2.245732000  | 1.406004000  | 1.141335000  |
| H | -1.754469000 | -0.494139000 | -1.075421000 |
| H | 1.612900000  | -0.996433000 | -2.425345000 |
| H | 0.794513000  | 2.010682000  | -1.155357000 |
| C | 5.433232000  | -2.341298000 | -1.063419000 |
| C | 6.003513000  | 0.371143000  | -1.065404000 |
| C | 6.945795000  | -0.532365000 | -1.544494000 |
| C | 6.657365000  | -1.892732000 | -1.538605000 |
| H | 5.217810000  | -3.402271000 | -1.047699000 |
| H | 6.233283000  | 1.428359000  | -1.038809000 |
| H | 7.903421000  | -0.181035000 | -1.905217000 |
| H | 7.389847000  | -2.605105000 | -1.894708000 |
| C | 4.460913000  | -1.438279000 | -0.613928000 |
| C | 4.770156000  | -0.072096000 | -0.605426000 |
| H | 4.060931000  | 0.629217000  | -0.187083000 |
| H | 3.256112000  | -2.803753000 | 0.573394000  |
| C | -1.527804000 | -2.871513000 | 0.279289000  |
| C | -3.760319000 | -3.609843000 | 0.955884000  |
| C | -2.957909000 | -2.960351000 | 0.001521000  |
| C | -5.129432000 | -3.735544000 | 0.785994000  |

|   |              |              |              |
|---|--------------|--------------|--------------|
| C | -3.590035000 | -2.473760000 | -1.154719000 |
| C | -4.960049000 | -2.610745000 | -1.329516000 |
| C | -5.737607000 | -3.232544000 | -0.359453000 |
| H | -5.722070000 | -4.232703000 | 1.542346000  |
| H | -3.011680000 | -2.014132000 | -1.939933000 |
| H | -5.421774000 | -2.234056000 | -2.232522000 |
| H | -6.805291000 | -3.334319000 | -0.499975000 |
| H | -1.176176000 | -3.566453000 | 1.034340000  |
| H | -3.290521000 | -4.012749000 | 1.843864000  |
| O | 1.040707000  | -3.047923000 | 1.225155000  |

#### A6

|   |              |              |              |
|---|--------------|--------------|--------------|
| C | 0.307458000  | -3.211428000 | -0.296710000 |
| C | -1.014074000 | -2.519489000 | -0.186686000 |
| F | 4.056270000  | 3.978035000  | -2.080359000 |
| C | 1.339849000  | 1.670280000  | -1.472455000 |
| C | 2.306179000  | 2.402468000  | -2.149946000 |
| C | 3.113139000  | 3.265998000  | -1.429110000 |
| C | 2.986872000  | 3.416770000  | -0.059861000 |
| C | 2.015530000  | 2.674780000  | 0.602018000  |
| C | 1.183132000  | 1.798149000  | -0.091135000 |
| H | 0.702095000  | 0.985111000  | -2.012022000 |
| H | 2.437520000  | 2.311818000  | -3.218801000 |
| H | 3.641667000  | 4.094366000  | 0.469150000  |
| H | 1.906563000  | 2.782274000  | 1.673378000  |

|   |              |              |              |
|---|--------------|--------------|--------------|
| N | 0.119946000  | -0.393675000 | 0.211824000  |
| C | -1.058031000 | -1.198078000 | 0.538404000  |
| C | 1.518194000  | -2.428840000 | 0.118701000  |
| C | 1.316110000  | -1.063408000 | 0.727011000  |
| C | 2.705855000  | -3.042726000 | -0.010540000 |
| C | 0.104962000  | 1.009886000  | 0.636547000  |
| P | -1.526104000 | 1.864380000  | 0.379441000  |
| O | -2.291368000 | 1.450620000  | 1.725675000  |
| O | -1.228200000 | 3.419429000  | 0.648904000  |
| C | -3.662578000 | 1.863144000  | 1.954164000  |
| C | -4.142970000 | 1.215346000  | 3.233005000  |
| C | -1.139236000 | 4.392035000  | -0.425407000 |
| C | -1.710512000 | 5.704503000  | 0.064018000  |
| H | -3.686740000 | 2.951587000  | 2.028639000  |
| H | -4.267165000 | 1.557158000  | 1.100047000  |
| H | -0.086948000 | 4.494913000  | -0.690377000 |
| H | -1.683789000 | 4.011757000  | -1.288148000 |
| H | -1.611953000 | 6.460876000  | -0.716272000 |
| H | -2.767459000 | 5.603728000  | 0.310558000  |
| H | -1.179534000 | 6.054479000  | 0.949134000  |
| H | -3.523255000 | 1.516584000  | 4.077279000  |
| H | -5.171202000 | 1.518802000  | 3.434940000  |
| H | -4.115996000 | 0.129335000  | 3.151417000  |
| H | -1.112396000 | -1.388171000 | 1.626211000  |
| H | 1.237828000  | -1.176291000 | 1.826038000  |

|   |              |              |              |
|---|--------------|--------------|--------------|
| O | -2.226498000 | 1.594513000  | -0.898776000 |
| H | -1.955963000 | -0.660438000 | 0.270938000  |
| H | 2.177112000  | -0.431566000 | 0.546743000  |
| H | 0.277166000  | 1.110214000  | 1.720607000  |
| C | 4.947793000  | -3.436506000 | 0.934872000  |
| C | 5.837041000  | -0.912940000 | 0.214698000  |
| C | 6.692463000  | -1.779629000 | 0.885623000  |
| C | 6.243043000  | -3.046110000 | 1.242253000  |
| H | 4.607335000  | -4.428837000 | 1.201678000  |
| H | 6.186483000  | 0.064039000  | -0.091680000 |
| H | 7.705091000  | -1.475974000 | 1.114728000  |
| H | 6.905120000  | -3.734388000 | 1.750590000  |
| C | 4.060335000  | -2.561429000 | 0.293116000  |
| C | 4.535064000  | -1.296641000 | -0.076749000 |
| H | 3.897381000  | -0.622700000 | -0.630649000 |
| H | 2.646183000  | -4.070037000 | -0.355959000 |
| C | -2.076247000 | -3.159776000 | -0.704322000 |
| C | -4.465049000 | -3.739252000 | -0.615083000 |
| C | -3.483629000 | -2.756006000 | -0.809033000 |
| C | -5.814585000 | -3.436240000 | -0.717124000 |
| C | -3.900975000 | -1.464353000 | -1.159620000 |
| C | -5.252722000 | -1.169243000 | -1.280265000 |
| C | -6.214623000 | -2.146589000 | -1.049822000 |
| H | -6.553232000 | -4.209040000 | -0.550149000 |
| H | -3.179204000 | -0.688899000 | -1.372995000 |

|   |              |              |              |
|---|--------------|--------------|--------------|
| H | -5.550645000 | -0.169649000 | -1.567874000 |
| H | -7.266133000 | -1.909963000 | -1.144188000 |
| H | -1.857333000 | -4.153339000 | -1.082992000 |
| H | -4.157887000 | -4.748840000 | -0.373229000 |
| O | 0.405825000  | -4.346968000 | -0.734710000 |

A7

|   |              |              |              |
|---|--------------|--------------|--------------|
| C | 0.289455000  | -3.161774000 | -0.133881000 |
| C | -1.033654000 | -2.469269000 | -0.080842000 |
| F | 4.066017000  | 3.697149000  | -2.636767000 |
| C | 2.157213000  | 2.572075000  | 0.216018000  |
| C | 3.142227000  | 3.212944000  | -0.528205000 |
| C | 3.115662000  | 3.081758000  | -1.903567000 |
| C | 2.147899000  | 2.332324000  | -2.551620000 |
| C | 1.174465000  | 1.699223000  | -1.793555000 |
| C | 1.164060000  | 1.815960000  | -0.401875000 |
| H | 2.177352000  | 2.652963000  | 1.295845000  |
| H | 3.922485000  | 3.793899000  | -0.057801000 |
| H | 2.164563000  | 2.253062000  | -3.629182000 |
| H | 0.411658000  | 1.107758000  | -2.279268000 |
| N | 0.098717000  | -0.325853000 | 0.140241000  |
| C | -1.075065000 | -1.099205000 | 0.546215000  |
| C | 1.486950000  | -2.367849000 | 0.291545000  |
| C | 1.304634000  | -0.930520000 | 0.705879000  |
| C | 2.672525000  | -3.005561000 | 0.243560000  |

|   |              |              |              |
|---|--------------|--------------|--------------|
| C | 0.087081000  | 1.118066000  | 0.414138000  |
| P | -1.549210000 | 1.933296000  | 0.072594000  |
| O | -2.330285000 | 1.656545000  | 1.456728000  |
| O | -1.276774000 | 3.512929000  | 0.061556000  |
| C | -3.770657000 | 1.824339000  | 1.535238000  |
| C | -4.242438000 | 1.253170000  | 2.853161000  |
| C | -0.914294000 | 4.318070000  | 1.203016000  |
| C | -1.278218000 | 5.756345000  | 0.903517000  |
| H | -4.003287000 | 2.888604000  | 1.459426000  |
| H | -4.228028000 | 1.313412000  | 0.689002000  |
| H | 0.159325000  | 4.219145000  | 1.369325000  |
| H | -1.437397000 | 3.950102000  | 2.086475000  |
| H | -0.992675000 | 6.392626000  | 1.742700000  |
| H | -0.758130000 | 6.105876000  | 0.012565000  |
| H | -2.350327000 | 5.860836000  | 0.739334000  |
| H | -3.766106000 | 1.759348000  | 3.692847000  |
| H | -5.322079000 | 1.381202000  | 2.942686000  |
| H | -4.018191000 | 0.189051000  | 2.916594000  |
| H | -1.975952000 | -0.585261000 | 0.244887000  |
| H | 1.272519000  | -0.858798000 | 1.811389000  |
| O | -2.245875000 | 1.513973000  | -1.160674000 |
| H | -1.117856000 | -1.204455000 | 1.646204000  |
| H | 2.168061000  | -0.353443000 | 0.380193000  |
| H | 0.274292000  | 1.323829000  | 1.482314000  |
| C | 5.094119000  | -3.244678000 | -0.023225000 |

|   |              |              |              |
|---|--------------|--------------|--------------|
| C | 5.646709000  | -1.162492000 | 1.716568000  |
| C | 6.691049000  | -1.834569000 | 1.092165000  |
| C | 6.408557000  | -2.882025000 | 0.221484000  |
| H | 4.879133000  | -4.066725000 | -0.693584000 |
| H | 5.859188000  | -0.361515000 | 2.412229000  |
| H | 7.716204000  | -1.552763000 | 1.291433000  |
| H | 7.213862000  | -3.420255000 | -0.260222000 |
| C | 4.022045000  | -2.558698000 | 0.572586000  |
| C | 4.329138000  | -1.515746000 | 1.460886000  |
| H | 3.540184000  | -0.999624000 | 1.984897000  |
| H | 2.612017000  | -4.019302000 | -0.137550000 |
| C | -2.092934000 | -3.146887000 | -0.553892000 |
| C | -4.485759000 | -3.710252000 | -0.415071000 |
| C | -3.500036000 | -2.751942000 | -0.692853000 |
| C | -5.833726000 | -3.412122000 | -0.548782000 |
| C | -3.910277000 | -1.495197000 | -1.158871000 |
| C | -5.260629000 | -1.206728000 | -1.310633000 |
| C | -6.227317000 | -2.155743000 | -0.996926000 |
| H | -6.576210000 | -4.164147000 | -0.316638000 |
| H | -3.183495000 | -0.745506000 | -1.437667000 |
| H | -5.553264000 | -0.236511000 | -1.689965000 |
| H | -7.277491000 | -1.924781000 | -1.116838000 |
| H | -1.870536000 | -4.163791000 | -0.862107000 |
| H | -4.183817000 | -4.695788000 | -0.083910000 |
| O | 0.395967000  | -4.317193000 | -0.516155000 |

A8

|   |              |              |              |
|---|--------------|--------------|--------------|
| C | 0.935870000  | -2.744851000 | -0.672814000 |
| C | 2.059922000  | -1.776360000 | -0.458977000 |
| F | 0.945435000  | 5.535843000  | -2.843621000 |
| C | -0.502630000 | 2.577847000  | -1.351902000 |
| C | -0.293532000 | 3.628162000  | -2.235593000 |
| C | 0.742403000  | 4.511620000  | -1.989772000 |
| C | 1.570890000  | 4.376689000  | -0.892097000 |
| C | 1.352032000  | 3.313450000  | -0.024890000 |
| C | 0.320982000  | 2.396421000  | -0.236578000 |
| H | -1.330544000 | 1.909607000  | -1.527892000 |
| H | -0.926194000 | 3.772135000  | -3.099835000 |
| H | 2.364550000  | 5.090660000  | -0.724616000 |
| H | 1.993074000  | 3.202875000  | 0.840188000  |
| N | 0.377229000  | -0.125290000 | 0.219314000  |
| C | 1.738112000  | -0.315458000 | -0.269410000 |
| C | -0.448319000 | -2.180625000 | -0.773090000 |
| C | -0.586417000 | -0.678831000 | -0.727405000 |
| C | -1.446721000 | -3.057142000 | -0.966390000 |
| C | 0.155045000  | 1.228071000  | 0.733939000  |
| P | -1.348955000 | 1.417827000  | 1.803922000  |
| O | -2.556950000 | 1.572668000  | 0.760092000  |
| O | -1.673592000 | -0.018473000 | 2.449799000  |
| C | -3.847562000 | 2.059641000  | 1.213576000  |



|   |              |              |              |
|---|--------------|--------------|--------------|
| C | -4.653845000 | 2.471774000  | 0.002798000  |
| C | -1.240708000 | -0.384598000 | 3.784938000  |
| C | -0.020395000 | -1.280390000 | 3.738976000  |
| H | -3.682430000 | 2.896855000  | 1.891082000  |
| H | -4.341162000 | 1.257084000  | 1.764663000  |
| H | -1.058397000 | 0.525960000  | 4.354821000  |
| H | -2.089523000 | -0.904896000 | 4.227117000  |
| H | 0.230464000  | -1.606373000 | 4.750086000  |
| H | -0.207284000 | -2.161156000 | 3.126326000  |
| H | 0.841560000  | -0.757369000 | 3.325916000  |
| H | -4.157231000 | 3.277557000  | -0.536806000 |
| H | -4.795857000 | 1.631650000  | -0.676646000 |
| H | -5.635579000 | 2.826693000  | 0.320101000  |
| H | 1.897426000  | 0.233344000  | -1.214555000 |
| H | -1.589936000 | -0.388318000 | -0.442948000 |
| O | -1.187928000 | 2.511284000  | 2.787741000  |
| H | 2.429644000  | 0.113232000  | 0.457442000  |
| H | -0.419157000 | -0.282613000 | -1.744606000 |
| H | 0.925266000  | 1.366445000  | 1.498646000  |
| C | -3.601398000 | -3.558742000 | -2.055638000 |
| C | -4.992602000 | -1.861418000 | -0.365970000 |
| C | -5.674867000 | -2.556287000 | -1.358388000 |
| C | -4.972592000 | -3.409003000 | -2.202806000 |
| H | -3.061970000 | -4.236269000 | -2.705162000 |
| H | -5.536665000 | -1.220504000 | 0.315354000  |

|   |              |              |              |
|---|--------------|--------------|--------------|
| H | -6.746035000 | -2.446837000 | -1.462323000 |
| H | -5.494874000 | -3.966624000 | -2.968818000 |
| C | -2.893950000 | -2.836998000 | -1.084086000 |
| C | -3.617093000 | -1.995296000 | -0.229187000 |
| H | -3.109421000 | -1.475449000 | 0.570687000  |
| H | -1.125392000 | -4.087495000 | -1.082570000 |
| C | 3.300132000  | -2.300425000 | -0.417893000 |
| C | 4.896341000  | -0.328594000 | -0.517880000 |
| C | 4.602894000  | -1.671153000 | -0.228665000 |
| C | 6.169472000  | 0.182966000  | -0.308580000 |
| C | 5.647904000  | -2.478519000 | 0.252190000  |
| C | 6.914326000  | -1.962997000 | 0.474700000  |
| C | 7.180480000  | -0.626025000 | 0.197355000  |
| H | 6.374562000  | 1.217491000  | -0.549917000 |
| H | 5.448488000  | -3.522096000 | 0.458724000  |
| H | 7.697162000  | -2.604916000 | 0.856010000  |
| H | 8.170285000  | -0.221851000 | 0.361518000  |
| H | 3.327318000  | -3.381030000 | -0.506882000 |
| H | 4.141436000  | 0.312895000  | -0.944936000 |
| O | 1.141742000  | -3.945632000 | -0.761927000 |

A9

|   |              |              |              |
|---|--------------|--------------|--------------|
| C | 0.820457000  | -2.285522000 | 0.293093000  |
| C | 1.935029000  | -1.558624000 | -0.391958000 |
| F | -4.999163000 | 3.534819000  | -1.718651000 |

|   |              |              |              |
|---|--------------|--------------|--------------|
| C | -2.326284000 | 1.873425000  | 0.063235000  |
| C | -3.578830000 | 2.408795000  | -0.215891000 |
| C | -3.787312000 | 3.009580000  | -1.442674000 |
| C | -2.789087000 | 3.090094000  | -2.397918000 |
| C | -1.546346000 | 2.548659000  | -2.101037000 |
| C | -1.293583000 | 1.937186000  | -0.871238000 |
| H | -2.157942000 | 1.405295000  | 1.021959000  |
| H | -4.383741000 | 2.363673000  | 0.503536000  |
| H | -2.988288000 | 3.569511000  | -3.345676000 |
| H | -0.758032000 | 2.597306000  | -2.841085000 |
| N | 0.244359000  | 0.047254000  | -1.276960000 |
| C | 1.572739000  | -0.515843000 | -1.437305000 |
| C | -0.571715000 | -2.060307000 | -0.213089000 |
| C | -0.790182000 | -0.967912000 | -1.237728000 |
| C | -1.527816000 | -2.871468000 | 0.279252000  |
| C | 0.088338000  | 1.348907000  | -0.638775000 |
| P | 0.766224000  | 1.527819000  | 1.093006000  |
| O | 0.237277000  | 2.952984000  | 1.630435000  |
| O | -0.051732000 | 0.454389000  | 1.956263000  |
| C | 1.129486000  | 4.035889000  | 1.992458000  |
| C | 1.041286000  | 5.157710000  | 0.978820000  |
| C | 0.378175000  | 0.130818000  | 3.309817000  |
| C | -0.443633000 | -1.033503000 | 3.812380000  |
| H | 0.802172000  | 4.371931000  | 2.976286000  |
| H | 2.143031000  | 3.646420000  | 2.072446000  |

|   |              |              |              |
|---|--------------|--------------|--------------|
| H | 1.439531000  | -0.112109000 | 3.281357000  |
| H | 0.235202000  | 1.016862000  | 3.931700000  |
| H | -0.154385000 | -1.260615000 | 4.839963000  |
| H | -1.507179000 | -0.794452000 | 3.801954000  |
| H | -0.268996000 | -1.918216000 | 3.202778000  |
| H | 0.014175000  | 5.504954000  | 0.869919000  |
| H | 1.657001000  | 5.998213000  | 1.304278000  |
| H | 1.402605000  | 4.833099000  | 0.002575000  |
| H | 1.612825000  | -0.996451000 | -2.425294000 |
| H | -0.835467000 | -1.420390000 | -2.239161000 |
| O | 2.245771000  | 1.405941000  | 1.141124000  |
| H | 2.302734000  | 0.286192000  | -1.451686000 |
| H | -1.754523000 | -0.493975000 | -1.075264000 |
| H | 0.794498000  | 2.010768000  | -1.155369000 |
| C | -3.590145000 | -2.473971000 | -1.154758000 |
| C | -5.129284000 | -3.736102000 | 0.785927000  |
| C | -5.737571000 | -3.233152000 | -0.359479000 |
| C | -4.960136000 | -2.611182000 | -1.329529000 |
| H | -3.011903000 | -2.014215000 | -1.939972000 |
| H | -5.721814000 | -4.233400000 | 1.542272000  |
| H | -6.805241000 | -3.335096000 | -0.499986000 |
| H | -5.421941000 | -2.234534000 | -2.232512000 |
| C | -2.957900000 | -2.960508000 | 0.001445000  |
| C | -3.760190000 | -3.610181000 | 0.955788000  |
| H | -3.290310000 | -4.013061000 | 1.843737000  |

|   |              |              |              |
|---|--------------|--------------|--------------|
| H | -1.176146000 | -3.566397000 | 1.034292000  |
| C | 3.184099000  | -1.959612000 | -0.105320000 |
| C | 5.433169000  | -2.341489000 | -1.063085000 |
| C | 4.460863000  | -1.438298000 | -0.613932000 |
| C | 6.657357000  | -1.893127000 | -1.538336000 |
| C | 4.770182000  | -0.072125000 | -0.605797000 |
| C | 6.003582000  | 0.370912000  | -1.065831000 |
| C | 6.945851000  | -0.532782000 | -1.544611000 |
| H | 7.389822000  | -2.605646000 | -1.894177000 |
| H | 4.060996000  | 0.629354000  | -0.187671000 |
| H | 6.233411000  | 1.428123000  | -1.039522000 |
| H | 7.903511000  | -0.181598000 | -1.905382000 |
| H | 3.255987000  | -2.803598000 | 0.573464000  |
| H | 5.217701000  | -3.402448000 | -1.047061000 |
| O | 1.040645000  | -3.047632000 | 1.225334000  |

A10

|   |              |              |              |
|---|--------------|--------------|--------------|
| C | 0.476550000  | -3.135603000 | -0.356340000 |
| C | -0.880736000 | -2.526402000 | -0.213697000 |
| F | 3.814611000  | 4.180444000  | -2.220753000 |
| C | 1.227297000  | 1.747435000  | -1.544852000 |
| C | 2.144673000  | 2.519294000  | -2.245329000 |
| C | 2.918636000  | 3.429817000  | -1.546997000 |
| C | 2.806002000  | 3.590428000  | -0.177765000 |
| C | 1.883470000  | 2.808688000  | 0.507487000  |

|   |              |              |              |
|---|--------------|--------------|--------------|
| C | 1.086274000  | 1.882911000  | -0.162720000 |
| H | 0.618305000  | 1.023492000  | -2.066805000 |
| H | 2.265564000  | 2.421363000  | -3.314726000 |
| H | 3.434704000  | 4.305711000  | 0.332963000  |
| H | 1.785044000  | 2.923768000  | 1.579220000  |
| N | 0.147119000  | -0.359456000 | 0.189026000  |
| C | -0.979192000 | -1.225192000 | 0.539823000  |
| C | 1.637529000  | -2.331672000 | 0.146278000  |
| C | 1.389575000  | -0.948164000 | 0.689503000  |
| C | 2.850188000  | -2.910438000 | 0.049999000  |
| C | 0.063004000  | 1.048117000  | 0.592042000  |
| P | -1.614434000 | 1.811915000  | 0.351397000  |
| O | -2.334307000 | 1.381233000  | 1.717659000  |
| O | -1.395336000 | 3.384157000  | 0.592833000  |
| C | -3.719736000 | 1.729410000  | 1.965578000  |
| C | -4.136648000 | 1.099069000  | 3.275058000  |
| C | -1.361490000 | 4.341705000  | -0.498309000 |
| C | -2.097644000 | 5.592505000  | -0.071472000 |
| H | -3.799811000 | 2.816933000  | 2.006532000  |
| H | -4.325803000 | 1.364927000  | 1.135861000  |
| H | -0.314019000 | 4.553141000  | -0.712495000 |
| H | -1.816989000 | 3.888603000  | -1.377409000 |
| H | -2.038572000 | 6.340724000  | -0.863565000 |
| H | -3.149547000 | 5.380926000  | 0.120413000  |
| H | -1.657907000 | 6.015139000  | 0.831909000  |

|   |              |              |              |
|---|--------------|--------------|--------------|
| H | -3.515881000 | 1.460424000  | 4.094624000  |
| H | -5.175171000 | 1.353457000  | 3.491600000  |
| H | -4.052509000 | 0.013964000  | 3.227081000  |
| H | -0.993687000 | -1.433151000 | 1.625559000  |
| H | 1.367336000  | -0.975781000 | 1.796715000  |
| O | -2.321342000 | 1.485923000  | -0.910005000 |
| H | -1.910780000 | -0.731091000 | 0.305639000  |
| H | 2.218741000  | -0.300357000 | 0.409912000  |
| H | 0.246785000  | 1.173491000  | 1.671812000  |
| C | 4.438966000  | -1.452363000 | 1.392546000  |
| C | 6.578642000  | -2.652869000 | 0.085295000  |
| C | 6.814525000  | -1.661193000 | 1.031860000  |
| C | 5.740409000  | -1.072136000 | 1.688789000  |
| H | 3.627761000  | -1.001278000 | 1.941762000  |
| H | 7.407563000  | -3.126770000 | -0.423215000 |
| H | 7.826813000  | -1.358506000 | 1.263672000  |
| H | 5.916746000  | -0.315364000 | 2.441647000  |
| C | 4.178287000  | -2.439739000 | 0.428664000  |
| C | 5.280589000  | -3.042688000 | -0.201280000 |
| H | 5.101882000  | -3.821697000 | -0.931113000 |
| H | 2.834997000  | -3.887475000 | -0.420817000 |
| C | -1.914209000 | -3.218146000 | -0.722373000 |
| C | -4.260268000 | -3.944099000 | -0.583816000 |
| C | -3.345726000 | -2.899262000 | -0.782445000 |
| C | -5.627902000 | -3.721725000 | -0.643053000 |

|   |              |              |              |
|---|--------------|--------------|--------------|
| C | -3.849319000 | -1.628468000 | -1.093718000 |
| C | -5.219350000 | -1.413789000 | -1.171251000 |
| C | -6.113870000 | -2.452129000 | -0.936231000 |
| H | -6.313844000 | -4.541119000 | -0.473422000 |
| H | -3.181163000 | -0.807265000 | -1.310974000 |
| H | -5.585185000 | -0.428819000 | -1.429630000 |
| H | -7.179961000 | -2.277856000 | -0.996988000 |
| H | -1.644620000 | -4.187466000 | -1.130070000 |
| H | -3.885940000 | -4.937760000 | -0.372461000 |
| O | 0.637631000  | -4.235144000 | -0.864016000 |

#### A11

|   |              |              |              |
|---|--------------|--------------|--------------|
| C | -0.044111000 | 2.829495000  | 0.394565000  |
| C | -1.291909000 | 2.132896000  | -0.048888000 |
| F | 5.053912000  | -3.744230000 | 0.690428000  |
| C | 2.023732000  | -1.797832000 | 0.987697000  |
| C | 3.226396000  | -2.401942000 | 1.325407000  |
| C | 3.884080000  | -3.154309000 | 0.368411000  |
| C | 3.379820000  | -3.316598000 | -0.908330000 |
| C | 2.177355000  | -2.700690000 | -1.229594000 |
| C | 1.486753000  | -1.934166000 | -0.293662000 |
| H | 1.501021000  | -1.206975000 | 1.725728000  |
| H | 3.652656000  | -2.298968000 | 2.312957000  |
| H | 3.918978000  | -3.915828000 | -1.627784000 |
| H | 1.766776000  | -2.831655000 | -2.221766000 |



|   |              |              |              |
|---|--------------|--------------|--------------|
| N | 0.068672000  | 0.112241000  | -0.259740000 |
| C | -1.156133000 | 0.782949000  | -0.703633000 |
| C | 1.247732000  | 2.248224000  | -0.080208000 |
| C | 1.212764000  | 0.896402000  | -0.742706000 |
| C | 2.356689000  | 2.978536000  | 0.145060000  |
| C | 0.153272000  | -1.301591000 | -0.663195000 |
| P | -1.132832000 | -2.459292000 | 0.048424000  |
| O | -1.219738000 | -2.205696000 | 1.627563000  |
| O | -2.533416000 | -1.939962000 | -0.565388000 |
| C | -1.826070000 | -1.068282000 | 2.286819000  |
| C | -2.047226000 | -1.431488000 | 3.738688000  |
| C | -3.650059000 | -2.866258000 | -0.693702000 |
| C | -3.720228000 | -3.433835000 | -2.095152000 |
| H | -1.158163000 | -0.213603000 | 2.187025000  |
| H | -2.768887000 | -0.829983000 | 1.793179000  |
| H | -3.546325000 | -3.662277000 | 0.042747000  |
| H | -4.534992000 | -2.278741000 | -0.452883000 |
| H | -2.834047000 | -4.029055000 | -2.308315000 |
| H | -4.598804000 | -4.075069000 | -2.188471000 |
| H | -3.799893000 | -2.635814000 | -2.833839000 |
| H | -1.103906000 | -1.680783000 | 4.223582000  |
| H | -2.492115000 | -0.585689000 | 4.265094000  |
| H | -2.716223000 | -2.286905000 | 3.828887000  |
| H | -1.152938000 | 0.881281000  | -1.806196000 |
| H | 1.162661000  | 0.997440000  | -1.843569000 |

|   |              |              |              |
|---|--------------|--------------|--------------|
| O | -0.832805000 | -3.871038000 | -0.256567000 |
| H | -2.018192000 | 0.174553000  | -0.456933000 |
| H | 2.132102000  | 0.365482000  | -0.519114000 |
| H | 0.018908000  | -1.412344000 | -1.751842000 |
| C | 4.186784000  | 1.914348000  | -1.252468000 |
| C | 6.083413000  | 3.217994000  | 0.306899000  |
| C | 6.493096000  | 2.385059000  | -0.729113000 |
| C | 5.539354000  | 1.743772000  | -1.511217000 |
| H | 3.468332000  | 1.432553000  | -1.897145000 |
| H | 6.817198000  | 3.731821000  | 0.913345000  |
| H | 7.546292000  | 2.246451000  | -0.932900000 |
| H | 5.849680000  | 1.111232000  | -2.332096000 |
| C | 3.753089000  | 2.736248000  | -0.200279000 |
| C | 4.733087000  | 3.399110000  | 0.557805000  |
| H | 4.418254000  | 4.055660000  | 1.358648000  |
| H | 2.179155000  | 3.890315000  | 0.705341000  |
| C | -2.453749000 | 2.769830000  | 0.190971000  |
| C | -4.212743000 | 1.541449000  | -1.163541000 |
| C | -3.831725000 | 2.408916000  | -0.127679000 |
| C | -5.551427000 | 1.263308000  | -1.402686000 |
| C | -4.851578000 | 3.001091000  | 0.636518000  |
| C | -6.186913000 | 2.711645000  | 0.406190000  |
| C | -6.543306000 | 1.837543000  | -0.615502000 |
| H | -5.821695000 | 0.602438000  | -2.215628000 |
| H | -4.579603000 | 3.692033000  | 1.424060000  |

|   |              |             |              |
|---|--------------|-------------|--------------|
| H | -6.950992000 | 3.174837000 | 1.016018000  |
| H | -7.585099000 | 1.617069000 | -0.805618000 |
| H | -2.343491000 | 3.700396000 | 0.737497000  |
| H | -3.466519000 | 1.107235000 | -1.810042000 |
| O | -0.083416000 | 3.843410000 | 1.075286000  |

## A12

|   |              |              |              |
|---|--------------|--------------|--------------|
| C | 0.307434000  | -3.211673000 | -0.295986000 |
| C | -1.014092000 | -2.519652000 | -0.186338000 |
| F | 4.055971000  | 3.977975000  | -2.080863000 |
| C | 1.339513000  | 1.670327000  | -1.472654000 |
| C | 2.305770000  | 2.402519000  | -2.150255000 |
| C | 3.112924000  | 3.265942000  | -1.429504000 |
| C | 2.986892000  | 3.416607000  | -0.060219000 |
| C | 2.015616000  | 2.674627000  | 0.601772000  |
| C | 1.183049000  | 1.798089000  | -0.091295000 |
| H | 0.701600000  | 0.985270000  | -2.012180000 |
| H | 2.436902000  | 2.311963000  | -3.219147000 |
| H | 3.641815000  | 4.094125000  | 0.468736000  |
| H | 1.906817000  | 2.782068000  | 1.673154000  |
| N | 0.119954000  | -0.393791000 | 0.211980000  |
| C | -1.058051000 | -1.198131000 | 0.538567000  |
| C | 1.518212000  | -2.428937000 | 0.119108000  |
| C | 1.316103000  | -1.063457000 | 0.727290000  |
| C | 2.705895000  | -3.042755000 | -0.010297000 |

|   |              |              |              |
|---|--------------|--------------|--------------|
| C | 0.104936000  | 1.009842000  | 0.636507000  |
| P | -1.526172000 | 1.864203000  | 0.379358000  |
| O | -2.291411000 | 1.450437000  | 1.725620000  |
| O | -1.228443000 | 3.419288000  | 0.648782000  |
| C | -3.662935000 | 1.862175000  | 1.953670000  |
| C | -4.141600000 | 1.218177000  | 3.235072000  |
| C | -1.139401000 | 4.391894000  | -0.425499000 |
| C | -1.710536000 | 5.704400000  | 0.063961000  |
| H | -3.688401000 | 2.950838000  | 2.024448000  |
| H | -4.267708000 | 1.552539000  | 1.101010000  |
| H | -0.087121000 | 4.494652000  | -0.690540000 |
| H | -1.684052000 | 4.011701000  | -1.288233000 |
| H | -1.611933000 | 6.460748000  | -0.716353000 |
| H | -2.767498000 | 5.603691000  | 0.310476000  |
| H | -1.179543000 | 6.054371000  | 0.949064000  |
| H | -3.521805000 | 1.523247000  | 4.077907000  |
| H | -5.170152000 | 1.520855000  | 3.436558000  |
| H | -4.113120000 | 0.131922000  | 3.157271000  |
| H | -1.955962000 | -0.660512000 | 0.270976000  |
| H | 1.237761000  | -1.176249000 | 1.826321000  |
| O | -2.226617000 | 1.594239000  | -0.898837000 |
| H | -1.112497000 | -1.388104000 | 1.626395000  |
| H | 2.177128000  | -0.431639000 | 0.547005000  |
| H | 0.277160000  | 1.110317000  | 1.720554000  |
| C | 4.947998000  | -3.436202000 | 0.934918000  |

|   |              |              |              |
|---|--------------|--------------|--------------|
| C | 5.836895000  | -0.912614000 | 0.214358000  |
| C | 6.692482000  | -1.779135000 | 0.885290000  |
| C | 6.243241000  | -3.045626000 | 1.242109000  |
| H | 4.607681000  | -4.428539000 | 1.201881000  |
| H | 6.186190000  | 0.064376000  | -0.092156000 |
| H | 7.705099000  | -1.475341000 | 1.114264000  |
| H | 6.905446000  | -3.733772000 | 1.750459000  |
| C | 4.060390000  | -2.561298000 | 0.293147000  |
| C | 4.534929000  | -1.296499000 | -0.076913000 |
| H | 3.897093000  | -0.622686000 | -0.630801000 |
| H | 2.646287000  | -4.070097000 | -0.355644000 |
| C | -2.076182000 | -3.159967000 | -0.704113000 |
| C | -4.464979000 | -3.739454000 | -0.615387000 |
| C | -3.483546000 | -2.756181000 | -0.809129000 |
| C | -5.814506000 | -3.436472000 | -0.717660000 |
| C | -3.900846000 | -1.464528000 | -1.159759000 |
| C | -5.252585000 | -1.169447000 | -1.280618000 |
| C | -6.214512000 | -2.146818000 | -1.050374000 |
| H | -6.553169000 | -4.209291000 | -0.550846000 |
| H | -3.179072000 | -0.689041000 | -1.373012000 |
| H | -5.550477000 | -0.169846000 | -1.568241000 |
| H | -7.266011000 | -1.910211000 | -1.144909000 |
| H | -1.857263000 | -4.153603000 | -1.082586000 |
| H | -4.157838000 | -4.749042000 | -0.373507000 |
| O | 0.405812000  | -4.347403000 | -0.733490000 |

A13

|   |              |              |              |
|---|--------------|--------------|--------------|
| C | 1.000390000  | -2.717478000 | -0.452995000 |
| C | 2.098358000  | -1.698954000 | -0.417750000 |
| F | -0.165995000 | 5.246347000  | -3.421173000 |
| C | 1.026997000  | 3.282419000  | -0.634299000 |
| C | 0.988835000  | 4.255931000  | -1.624456000 |
| C | -0.115453000 | 4.307780000  | -2.453830000 |
| C | -1.173944000 | 3.428338000  | -2.315530000 |
| C | -1.119145000 | 2.465281000  | -1.316449000 |
| C | -0.016003000 | 2.369976000  | -0.463215000 |
| H | 1.884413000  | 3.241068000  | 0.025156000  |
| H | 1.792952000  | 4.966297000  | -1.752771000 |
| H | -2.025954000 | 3.508896000  | -2.975460000 |
| H | -1.958013000 | 1.799096000  | -1.187747000 |
| N | 0.379861000  | -0.076575000 | 0.166685000  |
| C | 1.712470000  | -0.242383000 | -0.401323000 |
| C | -0.388512000 | -2.214098000 | -0.694801000 |
| C | -0.618713000 | -0.723930000 | -0.675462000 |
| C | -1.339559000 | -3.145160000 | -0.895049000 |
| C | 0.109850000  | 1.293564000  | 0.612482000  |
| P | -1.188248000 | 1.428065000  | 1.929448000  |
| O | -2.557293000 | 1.105101000  | 1.157634000  |
| O | -1.033254000 | 0.136508000  | 2.869751000  |
| C | -3.831062000 | 1.168230000  | 1.855466000  |

|   |              |              |              |
|---|--------------|--------------|--------------|
| C | -4.472347000 | 2.532217000  | 1.705071000  |
| C | -0.393586000 | 0.189804000  | 4.167982000  |
| C | 0.968992000  | -0.470674000 | 4.125939000  |
| H | -4.438397000 | 0.385682000  | 1.403798000  |
| H | -3.678152000 | 0.913405000  | 2.904615000  |
| H | -1.061809000 | -0.343865000 | 4.843511000  |
| H | -0.333274000 | 1.229042000  | 4.489560000  |
| H | 1.657769000  | 0.079276000  | 3.484504000  |
| H | 1.393545000  | -0.498225000 | 5.131204000  |
| H | 0.895007000  | -1.491477000 | 3.753276000  |
| H | -4.622081000 | 2.775936000  | 0.653252000  |
| H | -5.446661000 | 2.533494000  | 2.197615000  |
| H | -3.850656000 | 3.302596000  | 2.157756000  |
| H | 1.771245000  | 0.187227000  | -1.417388000 |
| H | -0.593152000 | -0.320978000 | -1.703487000 |
| O | -1.118491000 | 2.716532000  | 2.654891000  |
| H | 2.424927000  | 0.310355000  | 0.211817000  |
| H | -1.607887000 | -0.517616000 | -0.275859000 |
| H | 0.982262000  | 1.570568000  | 1.211270000  |
| C | -3.356253000 | -1.891239000 | -1.785703000 |
| C | -4.966129000 | -4.042921000 | -1.075935000 |
| C | -5.535401000 | -2.917888000 | -1.663527000 |
| C | -4.722817000 | -1.849316000 | -2.025335000 |
| H | -2.743551000 | -1.064637000 | -2.110243000 |
| H | -5.586769000 | -4.886026000 | -0.803273000 |

|   |              |              |              |
|---|--------------|--------------|--------------|
| H | -6.600016000 | -2.880469000 | -1.851425000 |
| H | -5.153898000 | -0.981584000 | -2.506995000 |
| C | -2.765140000 | -3.010089000 | -1.178180000 |
| C | -3.600006000 | -4.091137000 | -0.849301000 |
| H | -3.160133000 | -4.973225000 | -0.402167000 |
| H | -0.989696000 | -4.167312000 | -0.798403000 |
| C | 3.358546000  | -2.169870000 | -0.373213000 |
| C | 4.853584000  | -0.173970000 | -0.838663000 |
| C | 4.639120000  | -1.470037000 | -0.343216000 |
| C | 6.108489000  | 0.415270000  | -0.771536000 |
| C | 5.742065000  | -2.154200000 | 0.194902000  |
| C | 6.991108000  | -1.559882000 | 0.274147000  |
| C | 7.179297000  | -0.268288000 | -0.206929000 |
| H | 6.252614000  | 1.410825000  | -1.169970000 |
| H | 5.602554000  | -3.163426000 | 0.560328000  |
| H | 7.820662000  | -2.106063000 | 0.702883000  |
| H | 8.154767000  | 0.196222000  | -0.154769000 |
| H | 3.427928000  | -3.250789000 | -0.315569000 |
| H | 4.048871000  | 0.364360000  | -1.314939000 |
| O | 1.235918000  | -3.909954000 | -0.330248000 |

A14

|   |              |              |              |
|---|--------------|--------------|--------------|
| C | 1.102752000  | -2.869580000 | -0.195997000 |
| C | -0.287236000 | -2.415304000 | 0.139358000  |
| F | -4.030270000 | 1.800323000  | -4.241245000 |



|   |              |              |              |
|---|--------------|--------------|--------------|
| C | -2.011190000 | 2.439151000  | -1.306916000 |
| C | -3.011972000 | 2.573252000  | -2.263224000 |
| C | -3.057620000 | 1.677661000  | -3.313498000 |
| C | -2.132035000 | 0.657689000  | -3.437695000 |
| C | -1.138172000 | 0.539654000  | -2.475876000 |
| C | -1.060775000 | 1.421335000  | -1.393419000 |
| H | -1.985592000 | 3.147675000  | -0.494776000 |
| H | -3.750412000 | 3.359369000  | -2.195095000 |
| H | -2.191533000 | -0.025927000 | -4.272656000 |
| H | -0.410831000 | -0.254633000 | -2.556486000 |
| N | 0.467333000  | -0.139962000 | -0.235064000 |
| C | -0.467051000 | -0.967512000 | 0.522029000  |
| C | 2.202717000  | -1.854569000 | -0.108932000 |
| C | 1.848410000  | -0.411819000 | 0.151406000  |
| C | 3.456277000  | -2.315317000 | -0.285617000 |
| C | 0.110099000  | 1.261130000  | -0.416267000 |
| P | 0.029497000  | 2.215375000  | 1.187224000  |
| O | -0.047690000 | 3.778002000  | 0.784890000  |
| O | -1.439112000 | 1.899195000  | 1.745463000  |
| C | 1.001952000  | 4.725668000  | 1.109512000  |
| C | 1.687497000  | 5.208554000  | -0.151548000 |
| C | -1.816560000 | 2.301974000  | 3.087305000  |
| C | -3.189485000 | 1.741301000  | 3.381050000  |
| H | 0.509637000  | 5.549409000  | 1.626219000  |
| H | 1.703183000  | 4.252636000  | 1.795049000  |

|   |              |              |              |
|---|--------------|--------------|--------------|
| H | -1.068660000 | 1.926058000  | 3.785298000  |
| H | -1.817580000 | 3.392889000  | 3.133084000  |
| H | -3.499946000 | 2.035899000  | 4.384630000  |
| H | -3.923916000 | 2.117581000  | 2.669398000  |
| H | -3.183776000 | 0.653226000  | 3.328340000  |
| H | 0.967651000  | 5.637560000  | -0.848193000 |
| H | 2.421211000  | 5.976299000  | 0.100320000  |
| H | 2.211495000  | 4.394280000  | -0.652786000 |
| H | -0.301481000 | -0.858554000 | 1.607157000  |
| H | 2.020948000  | -0.152533000 | 1.204847000  |
| O | 1.147772000  | 1.906334000  | 2.111513000  |
| H | -1.478247000 | -0.629417000 | 0.330714000  |
| H | 2.502544000  | 0.231942000  | -0.439300000 |
| H | 0.983321000  | 1.729493000  | -0.885501000 |
| C | 4.989424000  | -0.415590000 | 0.413746000  |
| C | 7.079247000  | -1.660606000 | -0.934658000 |
| C | 7.298970000  | -0.450949000 | -0.283721000 |
| C | 6.252078000  | 0.160560000  | 0.396430000  |
| H | 4.207169000  | 0.065114000  | 0.979706000  |
| H | 7.889664000  | -2.152194000 | -1.456181000 |
| H | 8.280306000  | 0.004087000  | -0.295412000 |
| H | 6.420074000  | 1.089163000  | 0.925672000  |
| C | 4.743206000  | -1.628395000 | -0.250986000 |
| C | 5.823127000  | -2.244074000 | -0.906915000 |
| H | 5.659733000  | -3.190907000 | -1.405275000 |

|   |              |              |              |
|---|--------------|--------------|--------------|
| H | 3.512727000  | -3.372103000 | -0.522830000 |
| C | -1.246130000 | -3.355464000 | 0.145223000  |
| C | -3.286965000 | -4.261823000 | 1.186262000  |
| C | -2.682811000 | -3.247005000 | 0.430595000  |
| C | -4.642101000 | -4.227470000 | 1.480592000  |
| C | -3.498521000 | -2.220064000 | -0.062001000 |
| C | -4.858200000 | -2.195858000 | 0.217363000  |
| C | -5.434243000 | -3.191277000 | 0.998776000  |
| H | -5.082315000 | -5.015893000 | 2.076570000  |
| H | -3.078036000 | -1.457205000 | -0.701170000 |
| H | -5.470838000 | -1.400436000 | -0.185776000 |
| H | -6.493472000 | -3.167913000 | 1.217051000  |
| H | -0.891485000 | -4.360984000 | -0.057986000 |
| H | -2.678251000 | -5.079198000 | 1.551182000  |
| O | 1.329931000  | -4.027290000 | -0.513338000 |

#### A15

|   |              |              |              |
|---|--------------|--------------|--------------|
| C | 1.061596000  | -2.488447000 | -0.786263000 |
| C | 2.170975000  | -1.495614000 | -0.629805000 |
| F | -0.828334000 | 5.584972000  | -2.843560000 |
| C | -1.372114000 | 2.695564000  | -0.740840000 |
| C | -1.622150000 | 3.724240000  | -1.639417000 |
| C | -0.590517000 | 4.583278000  | -1.972459000 |
| C | 0.674051000  | 4.449419000  | -1.431110000 |
| C | 0.903583000  | 3.413294000  | -0.534774000 |

|   |              |              |              |
|---|--------------|--------------|--------------|
| C | -0.105735000 | 2.516869000  | -0.178593000 |
| H | -2.182134000 | 2.038726000  | -0.460049000 |
| H | -2.601737000 | 3.871918000  | -2.071237000 |
| H | 1.452483000  | 5.148103000  | -1.702318000 |
| H | 1.887074000  | 3.312471000  | -0.094032000 |
| N | 0.478908000  | 0.055042000  | 0.186763000  |
| C | 1.800947000  | -0.048877000 | -0.426870000 |
| C | -0.321244000 | -1.940255000 | -0.956194000 |
| C | -0.538201000 | -0.465982000 | -0.722763000 |
| C | -1.279852000 | -2.823367000 | -1.293945000 |
| C | 0.218153000  | 1.377482000  | 0.780132000  |
| P | -0.883877000 | 1.320259000  | 2.267855000  |
| O | -2.265191000 | 0.665190000  | 1.739842000  |
| O | -0.237542000 | 0.240083000  | 3.258005000  |
| C | -3.470902000 | 0.814149000  | 2.539070000  |
| C | -4.668311000 | 0.521408000  | 1.663897000  |
| C | -0.293350000 | -1.200415000 | 3.135482000  |
| C | -0.097196000 | -1.798193000 | 4.511828000  |
| H | -3.416345000 | 0.115648000  | 3.376412000  |
| H | -3.497189000 | 1.827554000  | 2.937568000  |
| H | 0.488408000  | -1.514792000 | 2.447046000  |
| H | -1.255248000 | -1.488347000 | 2.710459000  |
| H | 0.859541000  | -1.490062000 | 4.932481000  |
| H | -0.888150000 | -1.484052000 | 5.192690000  |
| H | -0.109049000 | -2.887233000 | 4.444726000  |

|   |              |              |              |
|---|--------------|--------------|--------------|
| H | -4.615117000 | -0.482613000 | 1.244110000  |
| H | -5.581101000 | 0.598637000  | 2.256608000  |
| H | -4.734949000 | 1.235889000  | 0.843570000  |
| H | 1.839502000  | 0.504165000  | -1.381881000 |
| H | -1.518954000 | -0.313839000 | -0.280422000 |
| O | -1.020321000 | 2.633467000  | 2.924699000  |
| H | 2.530281000  | 0.416536000  | 0.236022000  |
| H | -0.525859000 | 0.081072000  | -1.680945000 |
| H | 1.150347000  | 1.652155000  | 1.280187000  |
| C | -3.274643000 | -1.432137000 | -2.011037000 |
| C | -4.911159000 | -3.649182000 | -1.643863000 |
| C | -5.462933000 | -2.444810000 | -2.068526000 |
| C | -4.637114000 | -1.342798000 | -2.259979000 |
| H | -2.651473000 | -0.572057000 | -2.200398000 |
| H | -5.542290000 | -4.516813000 | -1.505360000 |
| H | -6.524391000 | -2.369911000 | -2.262741000 |
| H | -5.054792000 | -0.409780000 | -2.614370000 |
| C | -2.701051000 | -2.634094000 | -1.567456000 |
| C | -3.548562000 | -3.743682000 | -1.410422000 |
| H | -3.121490000 | -4.686498000 | -1.093709000 |
| H | -0.939825000 | -3.852154000 | -1.345112000 |
| C | 3.426053000  | -1.982121000 | -0.647855000 |
| C | 4.938431000  | 0.034542000  | -0.909779000 |
| C | 4.713159000  | -1.302062000 | -0.544771000 |
| C | 6.198422000  | 0.603402000  | -0.787327000 |

|   |             |              |              |
|---|-------------|--------------|--------------|
| C | 5.809782000 | -2.046510000 | -0.079139000 |
| C | 7.063884000 | -1.473355000 | 0.057008000  |
| C | 7.263188000 | -0.142301000 | -0.294568000 |
| H | 6.351455000 | 1.631853000  | -1.086306000 |
| H | 5.661741000 | -3.085735000 | 0.184702000  |
| H | 7.888860000 | -2.066208000 | 0.428684000  |
| H | 8.242857000 | 0.305915000  | -0.198181000 |
| H | 3.484068000 | -3.062887000 | -0.719955000 |
| H | 4.138319000 | 0.623366000  | -1.331227000 |
| O | 1.280906000 | -3.690191000 | -0.812310000 |

#### A16

|   |              |              |              |
|---|--------------|--------------|--------------|
| C | 0.899912000  | -2.702263000 | -0.483005000 |
| C | 2.034358000  | -1.724876000 | -0.459866000 |
| F | -0.038690000 | 5.356971000  | -3.272904000 |
| C | 1.148457000  | 3.292314000  | -0.557347000 |
| C | 1.122854000  | 4.286452000  | -1.527100000 |
| C | 0.000310000  | 4.397803000  | -2.325453000 |
| C | -1.087813000 | 3.557269000  | -2.175615000 |
| C | -1.044929000 | 2.572578000  | -1.197177000 |
| C | 0.075672000  | 2.417017000  | -0.375964000 |
| H | 2.020256000  | 3.205539000  | 0.078354000  |
| H | 1.950387000  | 4.967976000  | -1.662669000 |
| H | -1.952860000 | 3.683961000  | -2.810892000 |
| H | -1.905945000 | 1.937191000  | -1.059561000 |

|   |              |              |              |
|---|--------------|--------------|--------------|
| N | 0.393167000  | -0.055100000 | 0.197172000  |
| C | 1.698259000  | -0.256854000 | -0.421849000 |
| C | -0.474204000 | -2.145354000 | -0.692523000 |
| C | -0.657627000 | -0.649831000 | -0.619052000 |
| C | -1.454194000 | -3.039365000 | -0.921071000 |
| C | 0.189316000  | 1.315314000  | 0.675287000  |
| P | -1.058684000 | 1.475884000  | 2.037370000  |
| O | -2.474621000 | 1.279303000  | 1.305677000  |
| O | -0.961260000 | 0.137736000  | 2.918276000  |
| C | -3.699061000 | 1.451154000  | 2.068034000  |
| C | -4.860858000 | 1.502405000  | 1.102231000  |
| C | -0.268273000 | 0.089565000  | 4.189170000  |
| C | 1.057933000  | -0.630734000 | 4.057765000  |
| H | -3.791711000 | 0.609248000  | 2.755645000  |
| H | -3.619645000 | 2.371041000  | 2.647453000  |
| H | -0.144826000 | 1.105921000  | 4.561886000  |
| H | -0.935824000 | -0.447859000 | 4.862173000  |
| H | 1.513966000  | -0.739433000 | 5.043581000  |
| H | 0.920989000  | -1.622211000 | 3.628144000  |
| H | 1.751628000  | -0.076281000 | 3.425617000  |
| H | -4.922233000 | 0.585910000  | 0.516029000  |
| H | -5.793041000 | 1.617333000  | 1.657361000  |
| H | -4.762646000 | 2.348520000  | 0.422238000  |
| H | 1.732835000  | 0.179069000  | -1.436265000 |
| H | -0.663586000 | -0.217187000 | -1.635093000 |

|   |              |              |              |
|---|--------------|--------------|--------------|
| O | -0.885233000 | 2.728607000  | 2.805734000  |
| H | 2.449962000  | 0.268468000  | 0.167790000  |
| H | -1.623316000 | -0.427686000 | -0.171511000 |
| H | 1.088943000  | 1.546849000  | 1.252558000  |
| C | -3.735438000 | -3.933544000 | -0.928156000 |
| C | -4.804053000 | -1.609088000 | -1.987813000 |
| C | -5.641215000 | -2.677673000 | -1.686845000 |
| C | -5.099100000 | -3.843952000 | -1.156894000 |
| H | -3.316715000 | -4.847690000 | -0.527526000 |
| H | -5.213996000 | -0.707893000 | -2.424331000 |
| H | -6.703756000 | -2.607401000 | -1.876947000 |
| H | -5.738932000 | -4.686640000 | -0.931449000 |
| C | -2.875560000 | -2.855256000 | -1.196682000 |
| C | -3.440005000 | -1.692744000 | -1.744890000 |
| H | -2.809174000 | -0.862155000 | -2.020243000 |
| H | -1.133867000 | -4.074045000 | -0.863646000 |
| C | 3.277741000  | -2.239813000 | -0.442652000 |
| C | 4.829384000  | -0.294646000 | -0.931990000 |
| C | 4.581206000  | -1.582950000 | -0.432297000 |
| C | 6.103355000  | 0.254230000  | -0.884545000 |
| C | 5.669700000  | -2.302423000 | 0.088668000  |
| C | 6.938253000  | -1.748335000 | 0.148174000  |
| C | 7.160252000  | -0.463357000 | -0.336178000 |
| H | 6.273104000  | 1.244626000  | -1.285714000 |
| H | 5.503598000  | -3.306747000 | 0.456528000  |



|   |             |              |              |
|---|-------------|--------------|--------------|
| H | 7.756483000 | -2.320862000 | 0.564109000  |
| H | 8.150826000 | -0.030434000 | -0.299319000 |
| H | 3.311247000 | -3.322881000 | -0.393894000 |
| H | 4.034842000 | 0.268667000  | -1.396557000 |
| O | 1.093803000 | -3.903953000 | -0.379018000 |

A17

|   |              |              |              |
|---|--------------|--------------|--------------|
| C | -0.044242000 | 2.829466000  | 0.394490000  |
| C | -1.292046000 | 2.132872000  | -0.049017000 |
| F | 5.054263000  | -3.743782000 | 0.689693000  |
| C | 2.023884000  | -1.797763000 | 0.987458000  |
| C | 3.226660000  | -2.401759000 | 1.324989000  |
| C | 3.884310000  | -3.153996000 | 0.367871000  |
| C | 3.379901000  | -3.316287000 | -0.908814000 |
| C | 2.177325000  | -2.700504000 | -1.229895000 |
| C | 1.486755000  | -1.934102000 | -0.293834000 |
| H | 1.501208000  | -1.207001000 | 1.725590000  |
| H | 3.653026000  | -2.298795000 | 2.312494000  |
| H | 3.919039000  | -3.915426000 | -1.628359000 |
| H | 1.766621000  | -2.831468000 | -2.222015000 |
| N | 0.068595000  | 0.112256000  | -0.259850000 |
| C | -1.156243000 | 0.782927000  | -0.703770000 |
| C | 1.247630000  | 2.248227000  | -0.080250000 |
| C | 1.212661000  | 0.896449000  | -0.742840000 |
| C | 2.356573000  | 2.978506000  | 0.145136000  |

|   |              |              |              |
|---|--------------|--------------|--------------|
| C | 0.153180000  | -1.301608000 | -0.663180000 |
| P | -1.132793000 | -2.459255000 | 0.048762000  |
| O | -1.219549000 | -2.205445000 | 1.627872000  |
| O | -2.533469000 | -1.940016000 | -0.564943000 |
| C | -1.825794000 | -1.067949000 | 2.287050000  |
| C | -2.046979000 | -1.431045000 | 3.738945000  |
| C | -3.650112000 | -2.866337000 | -0.693047000 |
| C | -3.720142000 | -3.434382000 | -2.094328000 |
| H | -1.157821000 | -0.213329000 | 2.187206000  |
| H | -2.768590000 | -0.829601000 | 1.793391000  |
| H | -4.535041000 | -2.278716000 | -0.452499000 |
| H | -3.546446000 | -3.662123000 | 0.043661000  |
| H | -4.598788000 | -4.075520000 | -2.187596000 |
| H | -3.799541000 | -2.636590000 | -2.833296000 |
| H | -2.833994000 | -4.029784000 | -2.307136000 |
| H | -1.103682000 | -1.680439000 | 4.223835000  |
| H | -2.491741000 | -0.585155000 | 4.265312000  |
| H | -2.716086000 | -2.286368000 | 3.829202000  |
| H | -2.018294000 | 0.174510000  | -0.457102000 |
| H | 1.162484000  | 0.997572000  | -1.843688000 |
| O | -0.832780000 | -3.871046000 | -0.256050000 |
| H | -1.152994000 | 0.881255000  | -1.806331000 |
| H | 2.132018000  | 0.365529000  | -0.519350000 |
| H | 0.018643000  | -1.412474000 | -1.751792000 |
| C | 4.186691000  | 1.914326000  | -1.252353000 |

|   |              |             |              |
|---|--------------|-------------|--------------|
| C | 6.083303000  | 3.217771000 | 0.307204000  |
| C | 6.493000000  | 2.384865000 | -0.728827000 |
| C | 5.539265000  | 1.743678000 | -1.511025000 |
| H | 3.468246000  | 1.432614000 | -1.897102000 |
| H | 6.817082000  | 3.731523000 | 0.913721000  |
| H | 7.546200000  | 2.246200000 | -0.932552000 |
| H | 5.849603000  | 1.111156000 | -2.331914000 |
| C | 3.752981000  | 2.736190000 | -0.200143000 |
| C | 4.732971000  | 3.398951000 | 0.558038000  |
| H | 4.418127000  | 4.055474000 | 1.358900000  |
| H | 2.179026000  | 3.890249000 | 0.705472000  |
| C | -2.453890000 | 2.769788000 | 0.190853000  |
| C | -4.212686000 | 1.541570000 | -1.163999000 |
| C | -3.831835000 | 2.408819000 | -0.127894000 |
| C | -5.551322000 | 1.263323000 | -1.403292000 |
| C | -4.851791000 | 3.000679000 | 0.636403000  |
| C | -6.187076000 | 2.711120000 | 0.405929000  |
| C | -6.543307000 | 1.837235000 | -0.616007000 |
| H | -5.821464000 | 0.602633000 | -2.216421000 |
| H | -4.579940000 | 3.691448000 | 1.424139000  |
| H | -6.951251000 | 3.174061000 | 1.015828000  |
| H | -7.585066000 | 1.616691000 | -0.806230000 |
| H | -2.343669000 | 3.700325000 | 0.737434000  |
| H | -3.466359000 | 1.107639000 | -1.810573000 |
| O | -0.083571000 | 3.843355000 | 1.075240000  |

A18

|   |              |              |              |
|---|--------------|--------------|--------------|
| C | 0.640936000  | -2.955173000 | 0.434099000  |
| C | 1.769727000  | -2.088075000 | -0.023118000 |
| F | -5.408355000 | 2.816763000  | 0.404315000  |
| C | -2.083622000 | 1.472361000  | 0.863905000  |
| C | -3.371855000 | 1.900513000  | 1.154302000  |
| C | -4.152946000 | 2.404297000  | 0.128702000  |
| C | -3.688402000 | 2.488952000  | -1.170351000 |
| C | -2.397163000 | 2.053683000  | -1.441864000 |
| C | -1.578830000 | 1.543510000  | -0.435928000 |
| H | -1.462910000 | 1.076281000  | 1.653538000  |
| H | -3.771279000 | 1.849679000  | 2.157220000  |
| H | -4.328908000 | 2.881965000  | -1.946790000 |
| H | -2.023383000 | 2.115079000  | -2.455406000 |
| N | 0.122050000  | -0.258870000 | -0.251179000 |
| C | 1.466461000  | -0.730218000 | -0.600974000 |
| C | -0.737069000 | -2.527582000 | 0.036896000  |
| C | -0.850318000 | -1.245531000 | -0.743621000 |
| C | -1.742240000 | -3.369016000 | 0.332634000  |
| C | -0.165632000 | 1.094088000  | -0.759984000 |
| P | 1.063582000  | 2.353956000  | -0.136020000 |
| O | 0.331745000  | 3.698545000  | -0.588938000 |
| O | 0.925942000  | 2.398271000  | 1.464452000  |
| C | 1.016348000  | 4.973536000  | -0.494985000 |

|   |              |              |              |
|---|--------------|--------------|--------------|
| C | 0.252119000  | 5.981100000  | -1.323569000 |
| C | 1.848233000  | 1.688452000  | 2.332439000  |
| C | 1.838025000  | 2.359042000  | 3.687782000  |
| H | 1.045484000  | 5.266408000  | 0.555723000  |
| H | 2.038568000  | 4.850411000  | -0.853156000 |
| H | 2.839387000  | 1.711247000  | 1.881392000  |
| H | 1.516584000  | 0.651622000  | 2.401052000  |
| H | 0.837463000  | 2.353141000  | 4.119676000  |
| H | 2.506944000  | 1.825975000  | 4.365027000  |
| H | 2.176639000  | 3.392300000  | 3.613329000  |
| H | -0.774817000 | 6.073709000  | -0.971382000 |
| H | 0.731903000  | 6.958116000  | -1.249294000 |
| H | 0.234210000  | 5.686357000  | -2.372520000 |
| H | 1.581168000  | -0.755944000 | -1.701526000 |
| H | -0.667435000 | -1.451897000 | -1.815124000 |
| O | 2.457833000  | 2.197172000  | -0.618641000 |
| H | 2.198911000  | -0.015658000 | -0.242121000 |
| H | -1.848860000 | -0.837431000 | -0.678445000 |
| H | -0.035742000 | 1.139911000  | -1.854810000 |
| C | -3.933607000 | -2.101783000 | 0.203566000  |
| C | -5.228930000 | -4.450114000 | -0.519265000 |
| C | -5.953744000 | -3.269116000 | -0.404733000 |
| C | -5.301612000 | -2.099366000 | -0.030871000 |
| H | -3.456647000 | -1.189293000 | 0.528837000  |
| H | -5.728365000 | -5.369678000 | -0.793985000 |

|   |              |              |              |
|---|--------------|--------------|--------------|
| H | -7.019383000 | -3.263123000 | -0.590369000 |
| H | -5.860387000 | -1.180480000 | 0.087124000  |
| C | -3.183905000 | -3.278358000 | 0.073949000  |
| C | -3.864936000 | -4.456064000 | -0.267625000 |
| H | -3.308316000 | -5.381409000 | -0.343454000 |
| H | -1.422345000 | -4.292082000 | 0.805923000  |
| C | 3.006743000  | -2.612425000 | 0.102736000  |
| C | 4.615326000  | -0.951760000 | -0.979218000 |
| C | 4.333240000  | -2.118213000 | -0.245955000 |
| C | 5.925473000  | -0.582526000 | -1.248389000 |
| C | 5.425552000  | -2.893832000 | 0.185282000  |
| C | 6.732177000  | -2.521694000 | -0.082696000 |
| C | 6.988536000  | -1.359606000 | -0.802566000 |
| H | 6.113603000  | 0.321421000  | -1.811878000 |
| H | 5.231141000  | -3.800932000 | 0.742851000  |
| H | 7.549985000  | -3.137948000 | 0.266353000  |
| H | 8.006876000  | -1.064333000 | -1.017406000 |
| H | 3.012398000  | -3.595310000 | 0.561004000  |
| H | 3.825227000  | -0.321043000 | -1.350568000 |
| O | 0.832593000  | -3.973950000 | 1.081304000  |

A19

|   |              |              |              |
|---|--------------|--------------|--------------|
| C | 0.976713000  | -2.863222000 | -0.127212000 |
| C | 2.056496000  | -1.817736000 | -0.157285000 |
| F | -0.003431000 | 4.490383000  | -4.301312000 |

|   |              |              |              |
|---|--------------|--------------|--------------|
| C | -1.147432000 | 2.118594000  | -1.822317000 |
| C | -1.122451000 | 2.905403000  | -2.966581000 |
| C | -0.030299000 | 3.723638000  | -3.192039000 |
| C | 1.031598000  | 3.785286000  | -2.308850000 |
| C | 0.990632000  | 2.989840000  | -1.170651000 |
| C | -0.088331000 | 2.142910000  | -0.909410000 |
| H | -2.013863000 | 1.504925000  | -1.625167000 |
| H | -1.939266000 | 2.895097000  | -3.674085000 |
| H | 1.863848000  | 4.443956000  | -2.512054000 |
| H | 1.814572000  | 3.036890000  | -0.469672000 |
| N | 0.284925000  | -0.158628000 | 0.140541000  |
| C | 1.663083000  | -0.366893000 | -0.285725000 |
| C | -0.421471000 | -2.414767000 | -0.408901000 |
| C | -0.622605000 | -0.948928000 | -0.694494000 |
| C | -1.366336000 | -3.371410000 | -0.454711000 |
| C | -0.054822000 | 1.257288000  | 0.331827000  |
| P | -1.588291000 | 1.394902000  | 1.358610000  |
| O | -1.378640000 | 0.474994000  | 2.651535000  |
| O | -1.438412000 | 2.915942000  | 1.855717000  |
| C | -0.201464000 | 0.498546000  | 3.487522000  |
| C | -0.502918000 | -0.282232000 | 4.747904000  |
| C | -2.588634000 | 3.658579000  | 2.336995000  |
| C | -2.263051000 | 5.133481000  | 2.269753000  |
| H | 0.619138000  | 0.041042000  | 2.933342000  |
| H | 0.056055000  | 1.534556000  | 3.718231000  |

|   |              |              |              |
|---|--------------|--------------|--------------|
| H | -3.449407000 | 3.405858000  | 1.718962000  |
| H | -2.795623000 | 3.344805000  | 3.361828000  |
| H | -3.107957000 | 5.714076000  | 2.643096000  |
| H | -1.389881000 | 5.369199000  | 2.878118000  |
| H | -2.062418000 | 5.438273000  | 1.243188000  |
| H | -0.771177000 | -1.309741000 | 4.505673000  |
| H | 0.376943000  | -0.297767000 | 5.392799000  |
| H | -1.327424000 | 0.170354000  | 5.298092000  |
| H | 1.809736000  | -0.022449000 | -1.324524000 |
| H | -0.435269000 | -0.759367000 | -1.765575000 |
| O | -2.873514000 | 1.061309000  | 0.702483000  |
| H | 2.319536000  | 0.240348000  | 0.340572000  |
| H | -1.642076000 | -0.645323000 | -0.500005000 |
| H | 0.724425000  | 1.661108000  | 0.983135000  |
| C | -3.385570000 | -4.417840000 | -1.361209000 |
| C | -5.010910000 | -2.307288000 | -0.612595000 |
| C | -5.559688000 | -3.394362000 | -1.283778000 |
| C | -4.739858000 | -4.454191000 | -1.655425000 |
| H | -2.753544000 | -5.251751000 | -1.639212000 |
| H | -5.641874000 | -1.487347000 | -0.296781000 |
| H | -6.618814000 | -3.421626000 | -1.502974000 |
| H | -5.156984000 | -5.312888000 | -2.164617000 |
| C | -2.807235000 | -3.311856000 | -0.717728000 |
| C | -3.652292000 | -2.260264000 | -0.332404000 |
| H | -3.273953000 | -1.412442000 | 0.218352000  |



|   |              |              |              |
|---|--------------|--------------|--------------|
| H | -0.979624000 | -4.375503000 | -0.312652000 |
| C | 3.321885000  | -2.261029000 | -0.035109000 |
| C | 4.811864000  | -0.278613000 | -0.586329000 |
| C | 4.594685000  | -1.546605000 | -0.022939000 |
| C | 6.062073000  | 0.321678000  | -0.529025000 |
| C | 5.691798000  | -2.190514000 | 0.574468000  |
| C | 6.935719000  | -1.584577000 | 0.643381000  |
| C | 7.126044000  | -0.321189000 | 0.093225000  |
| H | 6.208113000  | 1.293866000  | -0.980997000 |
| H | 5.551489000  | -3.178579000 | 0.993409000  |
| H | 7.759878000  | -2.100316000 | 1.117811000  |
| H | 8.097731000  | 0.152055000  | 0.136917000  |
| H | 3.402386000  | -3.332424000 | 0.113383000  |
| H | 4.014789000  | 0.227903000  | -1.107521000 |
| O | 1.242811000  | -4.032712000 | 0.105970000  |

A20

|   |              |              |              |
|---|--------------|--------------|--------------|
| C | 0.976381000  | -2.863457000 | -0.127832000 |
| C | 2.056256000  | -1.818059000 | -0.158210000 |
| F | -0.005803000 | 4.491416000  | -4.300412000 |
| C | -1.148177000 | 2.118739000  | -1.821486000 |
| C | -1.123891000 | 2.905854000  | -2.965563000 |
| C | -0.032012000 | 3.724373000  | -3.191332000 |
| C | 1.030296000  | 3.785978000  | -2.308615000 |
| C | 0.990042000  | 2.990216000  | -1.170613000 |

|   |              |              |              |
|---|--------------|--------------|--------------|
| C | -0.088648000 | 2.143031000  | -0.909076000 |
| H | -2.014424000 | 1.504907000  | -1.624054000 |
| H | -1.941052000 | 2.895563000  | -3.672673000 |
| H | 1.862329000  | 4.444855000  | -2.512052000 |
| H | 1.814340000  | 3.037212000  | -0.470049000 |
| N | 0.285060000  | -0.158790000 | 0.140248000  |
| C | 1.662874000  | -0.367235000 | -0.286974000 |
| C | -0.421881000 | -2.414873000 | -0.409028000 |
| C | -0.623226000 | -0.948950000 | -0.694033000 |
| C | -1.366742000 | -3.371520000 | -0.455089000 |
| C | -0.054405000 | 1.257111000  | 0.331993000  |
| P | -1.587221000 | 1.394872000  | 1.359747000  |
| O | -1.376960000 | 0.474767000  | 2.652432000  |
| O | -1.436838000 | 2.915818000  | 1.856954000  |
| C | -0.199349000 | 0.497949000  | 3.487853000  |
| C | -0.500080000 | -0.283701000 | 4.747858000  |
| C | -2.586712000 | 3.659020000  | 2.338283000  |
| C | -2.261887000 | 5.133923000  | 2.267528000  |
| H | 0.621070000  | 0.040934000  | 2.932993000  |
| H | 0.058099000  | 1.533862000  | 3.719078000  |
| H | -3.448256000 | 3.404625000  | 1.722011000  |
| H | -2.792014000 | 3.347248000  | 3.364063000  |
| H | -3.106453000 | 5.714901000  | 2.641070000  |
| H | -1.387848000 | 5.371252000  | 2.874017000  |
| H | -2.063052000 | 5.436740000  | 1.240031000  |

|   |              |              |              |
|---|--------------|--------------|--------------|
| H | -0.768293000 | -1.311090000 | 4.505065000  |
| H | 0.380097000  | -0.299541000 | 5.392327000  |
| H | -1.324383000 | 0.168398000  | 5.298746000  |
| H | 1.808762000  | -0.023213000 | -1.326036000 |
| H | -0.437013000 | -0.759176000 | -1.765290000 |
| O | -2.872884000 | 1.061573000  | 0.704344000  |
| H | 2.319838000  | 0.240234000  | 0.338556000  |
| H | -1.642498000 | -0.645376000 | -0.498460000 |
| H | 0.725361000  | 1.660763000  | 0.982791000  |
| C | -3.652671000 | -2.260401000 | -0.331600000 |
| C | -4.740634000 | -4.453634000 | -1.655444000 |
| C | -5.560354000 | -3.393997000 | -1.283003000 |
| C | -5.011373000 | -2.307269000 | -0.611415000 |
| H | -3.274162000 | -1.412851000 | 0.219463000  |
| H | -5.157910000 | -5.312061000 | -2.164970000 |
| H | -6.619545000 | -3.421145000 | -1.501901000 |
| H | -5.642242000 | -1.487485000 | -0.294999000 |
| C | -2.807719000 | -3.311804000 | -0.717706000 |
| C | -3.386255000 | -4.417445000 | -1.361600000 |
| H | -2.754320000 | -5.251220000 | -1.640223000 |
| H | -0.980024000 | -4.375689000 | -0.313588000 |
| C | 3.321616000  | -2.261387000 | -0.035887000 |
| C | 4.811646000  | -0.279436000 | -0.588491000 |
| C | 4.594412000  | -1.546930000 | -0.024001000 |
| C | 6.061807000  | 0.320990000  | -0.531435000 |

|   |             |              |              |
|---|-------------|--------------|--------------|
| C | 5.691426000 | -2.190254000 | 0.574218000  |
| C | 6.935296000 | -1.584174000 | 0.642876000  |
| C | 7.125673000 | -0.321258000 | 0.091641000  |
| H | 6.207894000 | 1.292774000  | -0.984263000 |
| H | 5.551083000 | -3.177958000 | 0.994005000  |
| H | 7.759380000 | -2.099441000 | 1.117953000  |
| H | 8.097324000 | 0.152082000  | 0.135133000  |
| H | 3.402101000 | -3.332737000 | 0.112964000  |
| H | 4.014661000 | 0.226529000  | -1.110370000 |
| O | 1.242435000 | -4.032986000 | 0.105209000  |

#### A21

|   |              |              |              |
|---|--------------|--------------|--------------|
| C | 0.476084000  | -3.135902000 | -0.355871000 |
| C | -0.881111000 | -2.526465000 | -0.213415000 |
| F | 3.815485000  | 4.179819000  | -2.220254000 |
| C | 1.883774000  | 2.808355000  | 0.507737000  |
| C | 2.806504000  | 3.589970000  | -0.177398000 |
| C | 2.919318000  | 3.429309000  | -1.546605000 |
| C | 2.145352000  | 2.518865000  | -2.245039000 |
| C | 1.227776000  | 1.747138000  | -1.544681000 |
| C | 1.086568000  | 1.882663000  | -0.162569000 |
| H | 1.785208000  | 2.923465000  | 1.579453000  |
| H | 3.435216000  | 4.305191000  | 0.333404000  |
| H | 2.266396000  | 2.420899000  | -3.314414000 |
| H | 0.618764000  | 1.023257000  | -2.066696000 |

|   |              |              |              |
|---|--------------|--------------|--------------|
| N | 0.147028000  | -0.359575000 | 0.189033000  |
| C | -0.979436000 | -1.225106000 | 0.539869000  |
| C | 1.637170000  | -2.332000000 | 0.146516000  |
| C | 1.389352000  | -0.948443000 | 0.689676000  |
| C | 2.849791000  | -2.910817000 | 0.050100000  |
| C | 0.063076000  | 1.048022000  | 0.592046000  |
| P | -1.614246000 | 1.812049000  | 0.351127000  |
| O | -2.334340000 | 1.381521000  | 1.717325000  |
| O | -1.395020000 | 3.384271000  | 0.592536000  |
| C | -3.719664000 | 1.730068000  | 1.965230000  |
| C | -4.136733000 | 1.099912000  | 3.274753000  |
| C | -1.360957000 | 4.341807000  | -0.498616000 |
| C | -2.096481000 | 5.592912000  | -0.071595000 |
| H | -3.799471000 | 2.817613000  | 2.006112000  |
| H | -4.325844000 | 1.365684000  | 1.135548000  |
| H | -0.313440000 | 4.552806000  | -0.713007000 |
| H | -1.816820000 | 3.888890000  | -1.377619000 |
| H | -1.656379000 | 6.015325000  | 0.831712000  |
| H | -2.037237000 | 6.341128000  | -0.863677000 |
| H | -3.148438000 | 5.381794000  | 0.120494000  |
| H | -3.515874000 | 1.461166000  | 4.094294000  |
| H | -5.175193000 | 1.354568000  | 3.491282000  |
| H | -4.052859000 | 0.014784000  | 3.226841000  |
| H | -0.994046000 | -1.432878000 | 1.625638000  |
| H | 1.366961000  | -0.976041000 | 1.796887000  |

|   |              |              |              |
|---|--------------|--------------|--------------|
| O | -2.321018000 | 1.486079000  | -0.910357000 |
| H | -1.910932000 | -0.730913000 | 0.305517000  |
| H | 2.218648000  | -0.300764000 | 0.410190000  |
| H | 0.246700000  | 1.173346000  | 1.671843000  |
| C | 5.280172000  | -3.042781000 | -0.201731000 |
| C | 5.740164000  | -1.072646000 | 1.688741000  |
| C | 6.814209000  | -1.661435000 | 1.031456000  |
| C | 6.578242000  | -2.652899000 | 0.084689000  |
| H | 5.101399000  | -3.821633000 | -0.931717000 |
| H | 5.916574000  | -0.316051000 | 2.441759000  |
| H | 7.826512000  | -1.358709000 | 1.263148000  |
| H | 7.407113000  | -3.126592000 | -0.424096000 |
| C | 4.177940000  | -2.440087000 | 0.428572000  |
| C | 4.438701000  | -1.452926000 | 1.392649000  |
| H | 3.627544000  | -1.002073000 | 1.942130000  |
| H | 2.834516000  | -3.887891000 | -0.420641000 |
| C | -1.914668000 | -3.218123000 | -0.722042000 |
| C | -4.260883000 | -3.943594000 | -0.583500000 |
| C | -3.346121000 | -2.898978000 | -0.782292000 |
| C | -5.628467000 | -3.720969000 | -0.642906000 |
| C | -3.849439000 | -1.628158000 | -1.093894000 |
| C | -5.219424000 | -1.413231000 | -1.171597000 |
| C | -6.114164000 | -2.451344000 | -0.936420000 |
| H | -6.314585000 | -4.540189000 | -0.473147000 |
| H | -3.181103000 | -0.807133000 | -1.311270000 |

|   |              |              |              |
|---|--------------|--------------|--------------|
| H | -5.585045000 | -0.428250000 | -1.430233000 |
| H | -7.180216000 | -2.276879000 | -0.997310000 |
| H | -1.645223000 | -4.187565000 | -1.129542000 |
| H | -3.886762000 | -4.937279000 | -0.371884000 |
| O | 0.637023000  | -4.235604000 | -0.863255000 |

## A22

|   |              |              |              |
|---|--------------|--------------|--------------|
| C | 0.580236000  | -2.933452000 | 0.418012000  |
| C | 1.721254000  | -2.106088000 | -0.078148000 |
| F | -5.336090000 | 2.993630000  | 0.392227000  |
| C | -2.325365000 | 2.176752000  | -1.430286000 |
| C | -3.603518000 | 2.652505000  | -1.164669000 |
| C | -4.094785000 | 2.538530000  | 0.122206000  |
| C | -3.352742000 | 1.966704000  | 1.140921000  |
| C | -2.075970000 | 1.502957000  | 0.857962000  |
| C | -1.544721000 | 1.601323000  | -0.429671000 |
| H | -1.929724000 | 2.262723000  | -2.433775000 |
| H | -4.213310000 | 3.100558000  | -1.936062000 |
| H | -3.774211000 | 1.890495000  | 2.133026000  |
| H | -1.485910000 | 1.055197000  | 1.643647000  |
| N | 0.112316000  | -0.259021000 | -0.284623000 |
| C | 1.415777000  | -0.777656000 | -0.717371000 |
| C | -0.787611000 | -2.514377000 | -0.018746000 |
| C | -0.926548000 | -1.195249000 | -0.729582000 |
| C | -1.801296000 | -3.348883000 | 0.277977000  |
| C | -0.142631000 | 1.116949000  | -0.750325000 |

|   |              |              |              |
|---|--------------|--------------|--------------|
| P | 1.115203000  | 2.312070000  | -0.059295000 |
| O | 0.440081000  | 3.698013000  | -0.474946000 |
| O | 0.949851000  | 2.302371000  | 1.538448000  |
| C | 1.163153000  | 4.944162000  | -0.311961000 |
| C | 0.448031000  | 6.011838000  | -1.108584000 |
| C | 1.829609000  | 1.524237000  | 2.392754000  |
| C | 1.839536000  | 2.155916000  | 3.766712000  |
| H | 1.181253000  | 5.189764000  | 0.751053000  |
| H | 2.187759000  | 4.803529000  | -0.656743000 |
| H | 1.447910000  | 0.503261000  | 2.427674000  |
| H | 2.824614000  | 1.511677000  | 1.949944000  |
| H | 2.475041000  | 1.571424000  | 4.433696000  |
| H | 2.229332000  | 3.172869000  | 3.724872000  |
| H | 0.835881000  | 2.187275000  | 4.190334000  |
| H | -0.581667000 | 6.123707000  | -0.770348000 |
| H | 0.958282000  | 6.968021000  | -0.983444000 |
| H | 0.439845000  | 5.763363000  | -2.169584000 |
| H | 1.435506000  | -0.868726000 | -1.820779000 |
| H | -0.868484000 | -1.330722000 | -1.826544000 |
| O | 2.512277000  | 2.122980000  | -0.522040000 |
| H | 2.187978000  | -0.061078000 | -0.460021000 |
| H | -1.904681000 | -0.776250000 | -0.517462000 |
| H | 0.000134000  | 1.195370000  | -1.841369000 |
| C | -4.111890000 | -3.958223000 | 0.824058000  |
| C | -5.147962000 | -2.530326000 | -1.311315000 |



|   |              |              |              |
|---|--------------|--------------|--------------|
| C | -6.007276000 | -3.198788000 | -0.447014000 |
| C | -5.481964000 | -3.917607000 | 0.621891000  |
| H | -3.706919000 | -4.527351000 | 1.650929000  |
| H | -5.546905000 | -1.987489000 | -2.157833000 |
| H | -7.075876000 | -3.170526000 | -0.612249000 |
| H | -6.140850000 | -4.452813000 | 1.292563000  |
| C | -3.228112000 | -3.262778000 | -0.017907000 |
| C | -3.776365000 | -2.559336000 | -1.101662000 |
| H | -3.129382000 | -2.061393000 | -1.807226000 |
| H | -1.507385000 | -4.215062000 | 0.861294000  |
| C | 2.951838000  | -2.635401000 | 0.077303000  |
| C | 5.373606000  | -2.872451000 | 0.244003000  |
| C | 4.281785000  | -2.168254000 | -0.295624000 |
| C | 6.680662000  | -2.508960000 | -0.034660000 |
| C | 4.563617000  | -1.091697000 | -1.153906000 |
| C | 5.873508000  | -0.731436000 | -1.434855000 |
| C | 6.936724000  | -1.431608000 | -0.876253000 |
| H | 7.499229000  | -3.066841000 | 0.400242000  |
| H | 3.769477000  | -0.530261000 | -1.616757000 |
| H | 6.062340000  | 0.103712000  | -2.095797000 |
| H | 7.955430000  | -1.144191000 | -1.099777000 |
| H | 2.949459000  | -3.589418000 | 0.593344000  |
| H | 5.178744000  | -3.714379000 | 0.895726000  |
| O | 0.754561000  | -3.924967000 | 1.111239000  |

B1

|   |              |              |              |
|---|--------------|--------------|--------------|
| C | 0.889064000  | -3.085567000 | -0.217238000 |
| C | 2.011932000  | -2.095627000 | -0.118271000 |
| F | 1.544504000  | 4.736303000  | -3.581971000 |
| C | -0.190838000 | 2.065672000  | -1.869897000 |
| C | 0.180849000  | 2.952741000  | -2.870680000 |
| C | 1.185184000  | 3.869240000  | -2.613096000 |
| C | 1.828116000  | 3.921222000  | -1.391298000 |
| C | 1.448926000  | 3.017137000  | -0.406264000 |
| C | 0.439057000  | 2.078295000  | -0.621531000 |
| H | -0.993933000 | 1.372385000  | -2.064065000 |
| H | -0.302257000 | 2.946187000  | -3.837384000 |
| H | 2.606973000  | 4.650991000  | -1.222210000 |
| H | 1.951982000  | 3.047742000  | 0.551814000  |
| N | 0.323345000  | -0.336912000 | 0.222176000  |
| C | 1.700104000  | -0.620429000 | -0.162216000 |
| C | -0.493034000 | -2.536756000 | -0.379615000 |
| C | -0.617952000 | -1.055018000 | -0.629984000 |
| C | -1.507983000 | -3.412791000 | -0.338865000 |
| C | 0.101352000  | 1.084518000  | 0.488420000  |
| P | -1.536824000 | 1.388853000  | 1.304973000  |
| O | -1.340635000 | 2.833283000  | 1.990144000  |
| O | -2.509017000 | 1.701445000  | 0.068219000  |
| C | -1.424674000 | 3.027946000  | 3.424914000  |
| C | -0.062514000 | 3.352855000  | 4.001570000  |

|   |              |              |              |
|---|--------------|--------------|--------------|
| C | -3.888907000 | 2.078601000  | 0.299952000  |
| C | -4.611877000 | 2.083057000  | -1.027896000 |
| H | -2.117059000 | 3.857058000  | 3.569729000  |
| H | -1.848276000 | 2.132834000  | 3.877441000  |
| H | -4.336041000 | 1.366435000  | 0.994206000  |
| H | -3.898343000 | 3.068451000  | 0.759230000  |
| H | -5.648760000 | 2.388685000  | -0.880323000 |
| H | -4.144316000 | 2.781693000  | -1.721278000 |
| H | -4.608481000 | 1.089469000  | -1.474688000 |
| H | 0.373224000  | 4.221571000  | 3.508062000  |
| H | -0.158062000 | 3.575569000  | 5.065725000  |
| H | 0.621349000  | 2.510194000  | 3.896498000  |
| H | 1.916460000  | -0.225105000 | -1.170603000 |
| H | -0.419670000 | -0.865614000 | -1.700227000 |
| O | -2.008002000 | 0.340636000  | 2.238577000  |
| H | 2.364539000  | -0.092688000 | 0.524379000  |
| H | -1.629069000 | -0.716987000 | -0.434704000 |
| H | 0.774749000  | 1.322208000  | 1.317769000  |
| C | -3.740322000 | -3.993072000 | -1.227258000 |
| C | -4.977693000 | -2.053936000 | 0.316606000  |
| C | -5.740184000 | -2.850640000 | -0.530286000 |
| C | -5.115244000 | -3.823757000 | -1.302626000 |
| H | -3.259970000 | -4.763293000 | -1.817269000 |
| H | -5.460102000 | -1.318185000 | 0.946865000  |
| H | -6.814072000 | -2.726857000 | -0.575300000 |

|   |              |              |              |
|---|--------------|--------------|--------------|
| H | -5.700360000 | -4.459395000 | -1.954041000 |
| C | -2.956477000 | -3.172799000 | -0.404897000 |
| C | -3.597918000 | -2.206076000 | 0.380110000  |
| H | -3.025982000 | -1.599309000 | 1.069710000  |
| H | -1.208378000 | -4.453356000 | -0.260572000 |
| C | 3.247331000  | -2.610021000 | 0.034885000  |
| C | 4.859658000  | -0.676472000 | -0.297586000 |
| C | 4.548917000  | -1.963965000 | 0.169376000  |
| C | 6.131088000  | -0.145330000 | -0.130202000 |
| C | 5.576025000  | -2.698710000 | 0.786199000  |
| C | 6.840544000  | -2.161928000 | 0.965733000  |
| C | 7.123605000  | -0.878555000 | 0.509742000  |
| H | 6.349242000  | 0.844373000  | -0.509100000 |
| H | 5.363961000  | -3.701952000 | 1.132602000  |
| H | 7.608770000  | -2.746831000 | 1.453659000  |
| H | 8.112041000  | -0.459054000 | 0.640595000  |
| H | 3.270014000  | -3.692240000 | 0.103387000  |
| H | 4.120985000  | -0.097606000 | -0.829277000 |
| O | 1.096459000  | -4.287554000 | -0.156881000 |

B2

|   |              |              |              |
|---|--------------|--------------|--------------|
| C | 0.899763000  | -2.702239000 | -0.483049000 |
| C | 2.034287000  | -1.724944000 | -0.459716000 |
| F | -0.036904000 | 5.357227000  | -3.272365000 |
| C | -1.044233000 | 2.572822000  | -1.197169000 |

|   |              |              |              |
|---|--------------|--------------|--------------|
| C | -1.086631000 | 3.557595000  | -2.175553000 |
| C | 0.001643000  | 4.398003000  | -2.324957000 |
| C | 1.123893000  | 4.286451000  | -1.526212000 |
| C | 1.149016000  | 3.292233000  | -0.556533000 |
| C | 0.076048000  | 2.417057000  | -0.375577000 |
| H | -1.905377000 | 1.937541000  | -1.059890000 |
| H | -1.951441000 | 3.684444000  | -2.811122000 |
| H | 1.951571000  | 4.967869000  | -1.661423000 |
| H | 2.020595000  | 3.205296000  | 0.079449000  |
| N | 0.393164000  | -0.055094000 | 0.197315000  |
| C | 1.698319000  | -0.256888000 | -0.421552000 |
| C | -0.474294000 | -2.145208000 | -0.692616000 |
| C | -0.657548000 | -0.649666000 | -0.619105000 |
| C | -1.454341000 | -3.039114000 | -0.921299000 |
| C | 0.189324000  | 1.315219000  | 0.675621000  |
| P | -1.059040000 | 1.475725000  | 2.037410000  |
| O | -2.474819000 | 1.279788000  | 1.305225000  |
| O | -0.962340000 | 0.137294000  | 2.917996000  |
| C | -3.699401000 | 1.451136000  | 2.067483000  |
| C | -4.861019000 | 1.503158000  | 1.101507000  |
| C | -0.269397000 | 0.088561000  | 4.188897000  |
| C | 1.056748000  | -0.631807000 | 4.057322000  |
| H | -3.792214000 | 0.608727000  | 2.754453000  |
| H | -3.620062000 | 2.370598000  | 2.647585000  |
| H | -0.145865000 | 1.104762000  | 4.562007000  |

|   |              |              |              |
|---|--------------|--------------|--------------|
| H | -0.937043000 | -0.449039000 | 4.861664000  |
| H | 1.750517000  | -0.077214000 | 3.425375000  |
| H | 1.512745000  | -0.740811000 | 5.043126000  |
| H | 0.919778000  | -1.623152000 | 3.627415000  |
| H | -4.922403000 | 0.587051000  | 0.514703000  |
| H | -5.793280000 | 1.617844000  | 1.656555000  |
| H | -4.762586000 | 2.349704000  | 0.422085000  |
| H | 1.733027000  | 0.179147000  | -1.435913000 |
| H | -0.663250000 | -0.217009000 | -1.635154000 |
| O | -0.885460000 | 2.728155000  | 2.806221000  |
| H | 2.450006000  | 0.268296000  | 0.168226000  |
| H | -1.623303000 | -0.427385000 | -0.171781000 |
| H | 1.088842000  | 1.546643000  | 1.253096000  |
| C | -3.439943000 | -1.692320000 | -1.745324000 |
| C | -5.099315000 | -3.843329000 | -1.157390000 |
| C | -5.641257000 | -2.677023000 | -1.687460000 |
| C | -4.803960000 | -1.608537000 | -1.988394000 |
| H | -2.808996000 | -0.861808000 | -2.020648000 |
| H | -5.739259000 | -4.685938000 | -0.931967000 |
| H | -6.703770000 | -2.606661000 | -1.877686000 |
| H | -5.213762000 | -0.707324000 | -2.425007000 |
| C | -2.875679000 | -2.854862000 | -1.197007000 |
| C | -3.735686000 | -3.933051000 | -0.928512000 |
| H | -3.317096000 | -4.847221000 | -0.527799000 |
| H | -1.134112000 | -4.073828000 | -0.863933000 |

|   |             |              |              |
|---|-------------|--------------|--------------|
| C | 3.277628000 | -2.239978000 | -0.442498000 |
| C | 5.669571000 | -2.302723000 | 0.088950000  |
| C | 4.581135000 | -1.583194000 | -0.432049000 |
| C | 6.938154000 | -1.748703000 | 0.148483000  |
| C | 4.829391000 | -0.294904000 | -0.931734000 |
| C | 6.103392000 | 0.253903000  | -0.884263000 |
| C | 7.160237000 | -0.463742000 | -0.335873000 |
| H | 7.756339000 | -2.321278000 | 0.564439000  |
| H | 4.034890000 | 0.268457000  | -1.396315000 |
| H | 6.273200000 | 1.244290000  | -1.285430000 |
| H | 8.150836000 | -0.030878000 | -0.299002000 |
| H | 3.311062000 | -3.323054000 | -0.393858000 |
| H | 5.503410000 | -3.307035000 | 0.456813000  |
| O | 1.093558000 | -3.903953000 | -0.379150000 |

### B3

|   |              |              |              |
|---|--------------|--------------|--------------|
| C | 0.820930000  | -2.845680000 | -0.285746000 |
| C | 1.937258000  | -1.843900000 | -0.366069000 |
| F | -1.000964000 | 4.362934000  | -4.339861000 |
| C | -1.580850000 | 2.227662000  | -1.480212000 |
| C | -1.822384000 | 2.966733000  | -2.630563000 |
| C | -0.770963000 | 3.642894000  | -3.223202000 |
| C | 0.507783000  | 3.609312000  | -2.699022000 |
| C | 0.730266000  | 2.864762000  | -1.547020000 |
| C | -0.300681000 | 2.158700000  | -0.922405000 |

|   |              |              |              |
|---|--------------|--------------|--------------|
| H | -2.404315000 | 1.715830000  | -1.002283000 |
| H | -2.810711000 | 3.027392000  | -3.063296000 |
| H | 1.303018000  | 4.157252000  | -3.183939000 |
| H | 1.727726000  | 2.839241000  | -1.126216000 |
| N | 0.272830000  | -0.111655000 | 0.100290000  |
| C | 1.594309000  | -0.378069000 | -0.456792000 |
| C | -0.575689000 | -2.330382000 | -0.427743000 |
| C | -0.746003000 | -0.849396000 | -0.650600000 |
| C | -1.558892000 | -3.249070000 | -0.421661000 |
| C | 0.010452000  | 1.322143000  | 0.312332000  |
| P | -1.227210000 | 1.493266000  | 1.679195000  |
| O | -0.411844000 | 1.021824000  | 2.975170000  |
| O | -1.413979000 | 3.067550000  | 1.897212000  |
| C | -0.775937000 | -0.144435000 | 3.762076000  |
| C | 0.419508000  | -1.061143000 | 3.893427000  |
| C | -0.396076000 | 3.959680000  | 2.400390000  |
| C | -1.049492000 | 5.286210000  | 2.719815000  |
| H | -1.101400000 | 0.228495000  | 4.733431000  |
| H | -1.618606000 | -0.640622000 | 3.284433000  |
| H | 0.058714000  | 3.516136000  | 3.286260000  |
| H | 0.375000000  | 4.083713000  | 1.636126000  |
| H | -0.300819000 | 5.987522000  | 3.091359000  |
| H | -1.511418000 | 5.712764000  | 1.830163000  |
| H | -1.817545000 | 5.163025000  | 3.482581000  |
| H | 1.258888000  | -0.543145000 | 4.357854000  |



|   |              |              |              |
|---|--------------|--------------|--------------|
| H | 0.157975000  | -1.917069000 | 4.517956000  |
| H | 0.731633000  | -1.429115000 | 2.917420000  |
| H | 1.653234000  | -0.039206000 | -1.506661000 |
| H | -0.667090000 | -0.636111000 | -1.730719000 |
| O | -2.522629000 | 0.814847000  | 1.447706000  |
| H | 2.333219000  | 0.196857000  | 0.103247000  |
| H | -1.723775000 | -0.517726000 | -0.332512000 |
| H | 0.927152000  | 1.720101000  | 0.753573000  |
| C | -3.692502000 | -4.168076000 | -1.197441000 |
| C | -5.155408000 | -2.051558000 | -0.178935000 |
| C | -5.807173000 | -3.076377000 | -0.856221000 |
| C | -5.068582000 | -4.139325000 | -1.364058000 |
| H | -3.123047000 | -5.005325000 | -1.580544000 |
| H | -5.722700000 | -1.232802000 | 0.243282000  |
| H | -6.882391000 | -3.054172000 | -0.974240000 |
| H | -5.565274000 | -4.950777000 | -1.879302000 |
| C | -3.013906000 | -3.123531000 | -0.549795000 |
| C | -3.775530000 | -2.067791000 | -0.026759000 |
| H | -3.310169000 | -1.270983000 | 0.534505000  |
| H | -1.202613000 | -4.271942000 | -0.351916000 |
| C | 3.189166000  | -2.336263000 | -0.313745000 |
| C | 4.717633000  | -0.421612000 | -0.973884000 |
| C | 4.483882000  | -1.663364000 | -0.361976000 |
| C | 5.984777000  | 0.145030000  | -0.975085000 |
| C | 5.580627000  | -2.319914000 | 0.221255000  |

|   |             |              |              |
|---|-------------|--------------|--------------|
| C | 6.841944000 | -1.746732000 | 0.232788000  |
| C | 7.049347000 | -0.507257000 | -0.363809000 |
| H | 6.143478000 | 1.097099000  | -1.464124000 |
| H | 5.426720000 | -3.289752000 | 0.676444000  |
| H | 7.666278000 | -2.269773000 | 0.698845000  |
| H | 8.034508000 | -0.060628000 | -0.364851000 |
| H | 3.238481000 | -3.411108000 | -0.176687000 |
| H | 3.917184000 | 0.087126000  | -1.488412000 |
| O | 1.054551000 | -4.033174000 | -0.116214000 |

#### B4

|   |              |              |              |
|---|--------------|--------------|--------------|
| C | 0.613400000  | -2.933723000 | -0.044013000 |
| C | 1.796197000  | -2.020264000 | -0.161205000 |
| F | 0.346647000  | 4.421134000  | -4.319770000 |
| C | -0.986647000 | 2.258331000  | -1.745593000 |
| C | -0.911832000 | 3.022480000  | -2.903190000 |
| C | 0.270845000  | 3.676403000  | -3.197597000 |
| C | 1.375456000  | 3.597013000  | -2.370017000 |
| C | 1.283665000  | 2.825827000  | -1.218132000 |
| C | 0.112504000  | 2.140129000  | -0.888929000 |
| H | -1.920506000 | 1.782884000  | -1.485542000 |
| H | -1.758926000 | 3.123235000  | -3.566658000 |
| H | 2.279414000  | 4.131216000  | -2.625543000 |
| H | 2.141868000  | 2.763491000  | -0.560761000 |
| N | 0.236283000  | -0.184992000 | 0.163809000  |

|   |              |              |              |
|---|--------------|--------------|--------------|
| C | 1.533477000  | -0.555772000 | -0.392544000 |
| C | -0.727201000 | -2.358757000 | -0.373861000 |
| C | -0.843726000 | -0.865023000 | -0.548580000 |
| C | -1.741163000 | -3.239673000 | -0.484899000 |
| C | 0.090270000  | 1.264542000  | 0.360548000  |
| P | -1.356041000 | 1.635176000  | 1.457324000  |
| O | -1.289510000 | 0.615700000  | 2.688768000  |
| O | -0.882068000 | 3.063122000  | 2.028204000  |
| C | -0.116995000 | 0.402136000  | 3.506150000  |
| C | -0.527145000 | -0.413419000 | 4.712547000  |
| C | -1.847388000 | 4.007469000  | 2.558882000  |
| C | -1.240832000 | 5.391404000  | 2.500794000  |
| H | 0.623306000  | -0.130903000 | 2.908533000  |
| H | 0.293373000  | 1.369013000  | 3.804560000  |
| H | -2.760636000 | 3.940560000  | 1.968882000  |
| H | -2.078188000 | 3.719676000  | 3.586279000  |
| H | -1.941495000 | 6.117988000  | 2.915033000  |
| H | -0.317656000 | 5.437940000  | 3.078505000  |
| H | -1.020125000 | 5.673906000  | 1.471915000  |
| H | -0.944350000 | -1.370836000 | 4.403101000  |
| H | 0.342660000  | -0.603493000 | 5.343141000  |
| H | -1.274694000 | 0.114951000  | 5.303683000  |
| H | 1.591747000  | -0.310680000 | -1.467254000 |
| H | -0.833513000 | -0.605688000 | -1.621607000 |
| O | -2.697851000 | 1.610637000  | 0.835775000  |

|   |              |              |              |
|---|--------------|--------------|--------------|
| H | 2.306737000  | 0.032824000  | 0.102215000  |
| H | -1.797985000 | -0.524879000 | -0.150131000 |
| H | 0.949258000  | 1.563197000  | 0.966311000  |
| C | -3.703415000 | -1.940533000 | -1.445624000 |
| C | -5.376977000 | -4.049819000 | -0.751231000 |
| C | -5.906157000 | -2.918851000 | -1.363959000 |
| C | -5.062328000 | -1.871346000 | -1.715153000 |
| H | -3.072726000 | -1.122711000 | -1.753828000 |
| H | -6.022722000 | -4.875152000 | -0.482547000 |
| H | -6.965594000 | -2.857743000 | -1.573767000 |
| H | -5.463961000 | -0.993783000 | -2.203639000 |
| C | -3.150745000 | -3.066173000 | -0.813579000 |
| C | -4.018763000 | -4.123788000 | -0.490149000 |
| H | -3.609759000 | -5.008368000 | -0.019265000 |
| H | -1.456916000 | -4.262956000 | -0.264871000 |
| C | 3.012140000  | -2.578720000 | -0.019844000 |
| C | 4.662856000  | -0.836509000 | -0.835706000 |
| C | 4.344436000  | -1.985860000 | -0.095362000 |
| C | 5.958647000  | -0.339174000 | -0.857315000 |
| C | 5.386265000  | -2.627568000 | 0.594713000  |
| C | 6.676512000  | -2.122435000 | 0.583970000  |
| C | 6.968295000  | -0.971472000 | -0.140929000 |
| H | 6.182755000  | 0.540886000  | -1.445512000 |
| H | 5.166681000  | -3.529787000 | 1.150854000  |
| H | 7.457777000  | -2.630898000 | 1.133024000  |

|   |             |              |              |
|---|-------------|--------------|--------------|
| H | 7.976389000 | -0.579780000 | -0.159439000 |
| H | 2.992670000 | -3.635778000 | 0.222752000  |
| H | 3.906509000 | -0.350112000 | -1.432472000 |
| O | 0.751117000 | -4.107243000 | 0.267791000  |

## B5

|   |              |              |              |
|---|--------------|--------------|--------------|
| C | 0.914786000  | -2.680279000 | -0.607972000 |
| C | 2.066676000  | -1.732991000 | -0.468783000 |
| F | 0.600101000  | 5.631207000  | -2.796187000 |
| C | 1.364184000  | 3.334909000  | -0.114609000 |
| C | 1.482885000  | 4.408451000  | -0.988129000 |
| C | 0.496613000  | 4.596045000  | -1.937824000 |
| C | -0.598261000 | 3.755546000  | -2.028730000 |
| C | -0.703045000 | 2.692894000  | -1.141021000 |
| C | 0.279963000  | 2.457102000  | -0.175092000 |
| H | 2.129370000  | 3.184892000  | 0.636189000  |
| H | 2.318875000  | 5.091245000  | -0.937118000 |
| H | -1.355909000 | 3.943056000  | -2.776240000 |
| H | -1.575236000 | 2.059941000  | -1.188393000 |
| N | 0.431170000  | -0.070017000 | 0.223262000  |
| C | 1.762191000  | -0.262719000 | -0.341106000 |
| C | -0.439477000 | -2.080653000 | -0.828227000 |
| C | -0.589968000 | -0.587046000 | -0.679690000 |
| C | -1.433518000 | -2.937262000 | -1.128312000 |
| C | 0.233490000  | 1.270868000  | 0.784233000  |

|   |              |              |              |
|---|--------------|--------------|--------------|
| P | -1.156234000 | 1.371436000  | 2.010006000  |
| O | -2.487637000 | 1.473374000  | 1.122505000  |
| O | -1.332476000 | -0.095755000 | 2.638124000  |
| C | -3.755743000 | 1.774819000  | 1.764849000  |
| C | -4.781427000 | 2.047350000  | 0.688421000  |
| C | -0.447696000 | -0.576662000 | 3.677888000  |
| C | -1.125220000 | -1.729885000 | 4.384130000  |
| H | -4.041475000 | 0.917156000  | 2.375319000  |
| H | -3.616091000 | 2.637682000  | 2.415573000  |
| H | 0.481882000  | -0.900774000 | 3.206221000  |
| H | -0.233223000 | 0.242155000  | 4.365373000  |
| H | -0.466913000 | -2.125487000 | 5.159055000  |
| H | -2.053106000 | -1.404708000 | 4.854258000  |
| H | -1.352168000 | -2.532608000 | 3.683263000  |
| H | -4.905658000 | 1.180004000  | 0.040459000  |
| H | -5.744580000 | 2.270902000  | 1.149594000  |
| H | -4.487978000 | 2.902494000  | 0.079755000  |
| H | 1.860693000  | 0.245000000  | -1.316846000 |
| H | -0.530883000 | -0.100039000 | -1.668864000 |
| O | -0.937944000 | 2.451712000  | 2.996232000  |
| H | 2.492839000  | 0.199033000  | 0.323715000  |
| H | -1.572727000 | -0.363546000 | -0.271196000 |
| H | 1.073460000  | 1.412549000  | 1.469994000  |
| C | -3.359949000 | -1.503156000 | -1.942679000 |
| C | -5.093393000 | -3.625457000 | -1.477486000 |

|   |              |              |              |
|---|--------------|--------------|--------------|
| C | -5.589179000 | -2.423623000 | -1.972133000 |
| C | -4.714933000 | -1.369459000 | -2.212145000 |
| H | -2.698452000 | -0.682033000 | -2.170717000 |
| H | -5.762382000 | -4.456808000 | -1.299688000 |
| H | -6.644623000 | -2.314386000 | -2.182273000 |
| H | -5.088506000 | -0.440254000 | -2.621780000 |
| C | -2.842365000 | -2.702316000 | -1.428732000 |
| C | -3.738478000 | -3.764605000 | -1.222865000 |
| H | -3.355664000 | -4.705854000 | -0.850011000 |
| H | -1.139503000 | -3.981276000 | -1.116178000 |
| C | 3.297099000  | -2.277892000 | -0.434628000 |
| C | 4.911647000  | -0.342606000 | -0.717971000 |
| C | 4.613415000  | -1.657187000 | -0.325238000 |
| C | 6.195808000  | 0.166772000  | -0.584220000 |
| C | 5.663569000  | -2.441629000 | 0.180653000  |
| C | 6.941840000  | -1.927511000 | 0.327078000  |
| C | 7.213495000  | -0.617214000 | -0.052878000 |
| H | 6.404218000  | 1.178906000  | -0.904713000 |
| H | 5.459801000  | -3.465347000 | 0.467055000  |
| H | 7.729379000  | -2.550695000 | 0.729244000  |
| H | 8.212231000  | -0.215257000 | 0.051731000  |
| H | 3.304649000  | -3.362243000 | -0.460194000 |
| H | 4.149834000  | 0.275451000  | -1.167438000 |
| O | 1.080834000  | -3.890461000 | -0.582245000 |

B6

|   |              |              |              |
|---|--------------|--------------|--------------|
| C | 1.095907000  | -3.071638000 | -0.147910000 |
| C | 2.163030000  | -2.021825000 | -0.048301000 |
| F | 1.328041000  | 4.701484000  | -3.680263000 |
| C | -0.266237000 | 1.980095000  | -1.912016000 |
| C | 0.058007000  | 2.865015000  | -2.931025000 |
| C | 1.014911000  | 3.836215000  | -2.694015000 |
| C | 1.656679000  | 3.944578000  | -1.475264000 |
| C | 1.325579000  | 3.041870000  | -0.471862000 |
| C | 0.364143000  | 2.049173000  | -0.665888000 |
| H | -1.033986000 | 1.243701000  | -2.089895000 |
| H | -0.426099000 | 2.815114000  | -3.895947000 |
| H | 2.397694000  | 4.716235000  | -1.322798000 |
| H | 1.829407000  | 3.116053000  | 0.483617000  |
| N | 0.379706000  | -0.348157000 | 0.233783000  |
| C | 1.774329000  | -0.566160000 | -0.127501000 |
| C | -0.310714000 | -2.599547000 | -0.338332000 |
| C | -0.511351000 | -1.131093000 | -0.614849000 |
| C | -1.279863000 | -3.525638000 | -0.296256000 |
| C | 0.076144000  | 1.063417000  | 0.464704000  |
| P | -1.579295000 | 1.299280000  | 1.269391000  |
| O | -1.485014000 | 2.774249000  | 1.912333000  |
| O | -2.569448000 | 1.545582000  | 0.035753000  |
| C | -1.160169000 | 2.962738000  | 3.311491000  |
| C | -1.709177000 | 4.300901000  | 3.753994000  |



|   |              |              |              |
|---|--------------|--------------|--------------|
| C | -3.972245000 | 1.834433000  | 0.266880000  |
| C | -4.688755000 | 1.808326000  | -1.063930000 |
| H | -1.584364000 | 2.140270000  | 3.885832000  |
| H | -0.073082000 | 2.934513000  | 3.418750000  |
| H | -4.374538000 | 1.087830000  | 0.952028000  |
| H | -4.043403000 | 2.815966000  | 0.737136000  |
| H | -5.743199000 | 2.046815000  | -0.916951000 |
| H | -4.263670000 | 2.542951000  | -1.747408000 |
| H | -4.622192000 | 0.822265000  | -1.522421000 |
| H | -2.795150000 | 4.322577000  | 3.665333000  |
| H | -1.446768000 | 4.479779000  | 4.797786000  |
| H | -1.296736000 | 5.110032000  | 3.151652000  |
| H | 1.983948000  | -0.180750000 | -1.141256000 |
| H | -0.312103000 | -0.948552000 | -1.686098000 |
| O | -1.982449000 | 0.247784000  | 2.229446000  |
| H | 2.400278000  | 0.009881000  | 0.556422000  |
| H | -1.541556000 | -0.845257000 | -0.435185000 |
| H | 0.732285000  | 1.357122000  | 1.291646000  |
| C | -3.471756000 | -4.208752000 | -1.217447000 |
| C | -4.817742000 | -2.334446000 | 0.315949000  |
| C | -5.531596000 | -3.163237000 | -0.542345000 |
| C | -4.852097000 | -4.103122000 | -1.309761000 |
| H | -2.948956000 | -4.953770000 | -1.803704000 |
| H | -5.341593000 | -1.623824000 | 0.941935000  |
| H | -6.609443000 | -3.089667000 | -0.600538000 |

|   |              |              |              |
|---|--------------|--------------|--------------|
| H | -5.398598000 | -4.762791000 | -1.970762000 |
| C | -2.737639000 | -3.355663000 | -0.383017000 |
| C | -3.433187000 | -2.421845000 | 0.395668000  |
| H | -2.898219000 | -1.789023000 | 1.091644000  |
| H | -0.930424000 | -4.548678000 | -0.196745000 |
| C | 3.420624000  | -2.466254000 | 0.138607000  |
| C | 4.934623000  | -0.456828000 | -0.205205000 |
| C | 4.682966000  | -1.748658000 | 0.284686000  |
| C | 6.172262000  | 0.144928000  | -0.023971000 |
| C | 5.734031000  | -2.414029000 | 0.938663000  |
| C | 6.964142000  | -1.806722000 | 1.131850000  |
| C | 7.188263000  | -0.520240000 | 0.652497000  |
| H | 6.346157000  | 1.136357000  | -0.420879000 |
| H | 5.567797000  | -3.419483000 | 1.303239000  |
| H | 7.751645000  | -2.338969000 | 1.648454000  |
| H | 8.150030000  | -0.045669000 | 0.793595000  |
| H | 3.499575000  | -3.544220000 | 0.229369000  |
| H | 4.177691000  | 0.069589000  | -0.765066000 |
| O | 1.365412000  | -4.259842000 | -0.065572000 |

B7

|   |              |              |              |
|---|--------------|--------------|--------------|
| C | -1.226837000 | -2.783546000 | -0.128178000 |
| C | -2.292666000 | -1.753559000 | 0.082772000  |
| F | 1.811268000  | 3.742033000  | 4.466438000  |
| C | -0.475116000 | 2.659435000  | 1.887357000  |

|   |              |              |              |
|---|--------------|--------------|--------------|
| C | -0.008686000 | 3.245768000  | 3.057748000  |
| C | 1.343156000  | 3.173970000  | 3.336047000  |
| C | 2.231524000  | 2.543789000  | 2.483182000  |
| C | 1.745486000  | 1.963352000  | 1.319267000  |
| C | 0.385544000  | 2.005844000  | 1.002727000  |
| H | -1.530884000 | 2.723743000  | 1.657066000  |
| H | -0.672932000 | 3.755409000  | 3.740967000  |
| H | 3.283893000  | 2.521093000  | 2.728095000  |
| H | 2.440937000  | 1.489662000  | 0.641560000  |
| N | -0.533329000 | -0.084342000 | -0.138668000 |
| C | -1.863946000 | -0.342937000 | 0.397987000  |
| C | 0.177793000  | -2.387067000 | 0.206716000  |
| C | 0.457139000  | -0.936834000 | 0.507856000  |
| C | 1.096629000  | -3.370751000 | 0.204911000  |
| C | -0.196340000 | 1.344788000  | -0.239754000 |
| P | 0.665070000  | 1.652387000  | -1.847286000 |
| O | 1.136509000  | 3.182984000  | -1.678426000 |
| O | 2.009730000  | 0.770898000  | -1.747491000 |
| C | 1.102670000  | 4.130389000  | -2.773088000 |
| C | 0.696809000  | 5.484699000  | -2.233841000 |
| C | 2.723536000  | 0.391392000  | -2.954633000 |
| C | 3.671405000  | -0.737443000 | -2.619892000 |
| H | 2.102652000  | 4.169100000  | -3.209632000 |
| H | 0.406857000  | 3.770504000  | -3.529778000 |
| H | 1.994222000  | 0.097906000  | -3.708172000 |

|   |              |              |              |
|---|--------------|--------------|--------------|
| H | 3.268225000  | 1.265346000  | -3.318684000 |
| H | 4.228938000  | -1.022384000 | -3.513555000 |
| H | 4.385295000  | -0.438427000 | -1.852722000 |
| H | 3.126846000  | -1.610779000 | -2.263688000 |
| H | 1.382208000  | 5.815047000  | -1.453609000 |
| H | 0.710128000  | 6.221446000  | -3.038801000 |
| H | -0.309795000 | 5.450737000  | -1.817324000 |
| H | -1.897082000 | -0.161445000 | 1.488327000  |
| H | 0.470522000  | -0.767180000 | 1.598825000  |
| O | -0.146857000 | 1.407092000  | -3.059178000 |
| H | -2.566338000 | 0.351382000  | -0.062588000 |
| H | 1.443015000  | -0.677421000 | 0.132560000  |
| H | -1.140374000 | 1.850964000  | -0.452799000 |
| C | 3.146265000  | -2.397022000 | 1.338751000  |
| C | 4.687591000  | -4.419477000 | 0.215677000  |
| C | 5.288983000  | -3.458683000 | 1.022187000  |
| C | 4.510258000  | -2.456025000 | 1.588712000  |
| H | 2.561000000  | -1.629031000 | 1.819864000  |
| H | 5.281161000  | -5.212726000 | -0.218864000 |
| H | 6.351864000  | -3.499625000 | 1.218980000  |
| H | 4.965700000  | -1.719877000 | 2.237864000  |
| C | 2.523103000  | -3.347596000 | 0.514482000  |
| C | 3.323372000  | -4.370147000 | -0.022467000 |
| H | 2.857829000  | -5.127527000 | -0.639932000 |
| H | 0.713773000  | -4.336954000 | -0.105618000 |

|   |              |              |              |
|---|--------------|--------------|--------------|
| C | -3.566327000 | -2.163802000 | -0.059283000 |
| C | -4.999029000 | -0.306412000 | 0.901066000  |
| C | -4.823772000 | -1.437949000 | 0.089347000  |
| C | -6.233239000 | 0.322060000  | 0.990921000  |
| C | -5.944753000 | -1.924987000 | -0.603097000 |
| C | -7.172936000 | -1.288426000 | -0.524407000 |
| C | -7.322091000 | -0.157929000 | 0.272291000  |
| H | -6.347371000 | 1.186215000  | 1.631963000  |
| H | -5.835767000 | -2.810225000 | -1.216232000 |
| H | -8.016947000 | -1.677871000 | -1.077819000 |
| H | -8.281562000 | 0.336527000  | 0.342739000  |
| H | -3.669324000 | -3.198041000 | -0.369532000 |
| H | -4.180010000 | 0.062158000  | 1.499294000  |
| O | -1.497378000 | -3.911074000 | -0.511770000 |

B8

|   |              |              |              |
|---|--------------|--------------|--------------|
| C | 0.899830000  | -2.702286000 | -0.483005000 |
| C | 2.034319000  | -1.724947000 | -0.459715000 |
| F | -0.037682000 | 5.356715000  | -3.273104000 |
| C | -1.044615000 | 2.572644000  | -1.197271000 |
| C | -1.087218000 | 3.557273000  | -2.175792000 |
| C | 0.001050000  | 4.397614000  | -2.325579000 |
| C | 1.123488000  | 4.286139000  | -1.527083000 |
| C | 1.148816000  | 3.292071000  | -0.557259000 |
| C | 0.075856000  | 2.416964000  | -0.375917000 |

|   |              |              |              |
|---|--------------|--------------|--------------|
| H | -1.905737000 | 1.937399000  | -1.059690000 |
| H | -1.952176000 | 3.684044000  | -2.811175000 |
| H | 1.951147000  | 4.967521000  | -1.662603000 |
| H | 2.020543000  | 3.205198000  | 0.078528000  |
| N | 0.393150000  | -0.055113000 | 0.197272000  |
| C | 1.698298000  | -0.256905000 | -0.421602000 |
| C | -0.474250000 | -2.145309000 | -0.692521000 |
| C | -0.657573000 | -0.649772000 | -0.619090000 |
| C | -1.454283000 | -3.039269000 | -0.921075000 |
| C | 0.189295000  | 1.315288000  | 0.675404000  |
| P | -1.058907000 | 1.475908000  | 2.037319000  |
| O | -2.474767000 | 1.279470000  | 1.305411000  |
| O | -0.961698000 | 0.137766000  | 2.918244000  |
| C | -3.699241000 | 1.451634000  | 2.067688000  |
| C | -4.860996000 | 1.502628000  | 1.101822000  |
| C | -0.268857000 | 0.089613000  | 4.189229000  |
| C | 1.057475000  | -0.630476000 | 4.057993000  |
| H | -3.791965000 | 0.609954000  | 2.755566000  |
| H | -3.619776000 | 2.371695000  | 2.646814000  |
| H | -0.936430000 | -0.447934000 | 4.862108000  |
| H | -0.145594000 | 1.105966000  | 4.562010000  |
| H | 0.920777000  | -1.621995000 | 3.628398000  |
| H | 1.751155000  | -0.075914000 | 3.425921000  |
| H | 1.513422000  | -0.739052000 | 5.043866000  |
| H | -4.922401000 | 0.585945000  | 0.515923000  |

|   |              |              |              |
|---|--------------|--------------|--------------|
| H | -5.793191000 | 1.617814000  | 1.656876000  |
| H | -4.762704000 | 2.348510000  | 0.421552000  |
| H | 1.733005000  | 0.179093000  | -1.435982000 |
| H | -1.623314000 | -0.427526000 | -0.171717000 |
| O | -0.885528000 | 2.728599000  | 2.805741000  |
| H | 2.449974000  | 0.268324000  | 0.168153000  |
| H | -0.663340000 | -0.217162000 | -1.635155000 |
| H | 1.088867000  | 1.546796000  | 1.252766000  |
| C | -3.735560000 | -3.933357000 | -0.928132000 |
| C | -4.804067000 | -1.608953000 | -1.988007000 |
| C | -5.641270000 | -2.677490000 | -1.686988000 |
| C | -5.099210000 | -3.843743000 | -1.156925000 |
| H | -3.316878000 | -4.847485000 | -0.527419000 |
| H | -5.213965000 | -0.707781000 | -2.424616000 |
| H | -6.703801000 | -2.607204000 | -1.877144000 |
| H | -5.739075000 | -4.686395000 | -0.931438000 |
| C | -2.875643000 | -2.855114000 | -1.196711000 |
| C | -3.440029000 | -1.692629000 | -1.745026000 |
| H | -2.809168000 | -0.862075000 | -2.020416000 |
| H | -1.134003000 | -4.073964000 | -0.863660000 |
| C | 3.277679000  | -2.239936000 | -0.442491000 |
| C | 4.829389000  | -0.294815000 | -0.931731000 |
| C | 4.581170000  | -1.583126000 | -0.432080000 |
| C | 6.103380000  | 0.254017000  | -0.884274000 |
| C | 5.669638000  | -2.302653000 | 0.088861000  |

|   |             |              |              |
|---|-------------|--------------|--------------|
| C | 6.938209000 | -1.748611000 | 0.148380000  |
| C | 7.160253000 | -0.463627000 | -0.335935000 |
| H | 6.273161000 | 1.244419000  | -1.285412000 |
| H | 5.503501000 | -3.306982000 | 0.456691000  |
| H | 7.756419000 | -2.321180000 | 0.564296000  |
| H | 8.150846000 | -0.030747000 | -0.299075000 |
| H | 3.311140000 | -3.323009000 | -0.393819000 |
| H | 4.034864000 | 0.268545000  | -1.396270000 |
| O | 1.093667000 | -3.903993000 | -0.379104000 |

#### B9

|   |              |              |              |
|---|--------------|--------------|--------------|
| C | 0.613399000  | -2.933719000 | -0.044010000 |
| C | 1.796199000  | -2.020263000 | -0.161183000 |
| F | 0.346816000  | 4.421185000  | -4.319706000 |
| C | 1.283709000  | 2.825859000  | -1.218040000 |
| C | 1.375543000  | 3.597059000  | -2.369913000 |
| C | 0.270970000  | 3.676443000  | -3.197544000 |
| C | -0.911712000 | 3.022498000  | -2.903200000 |
| C | -0.986572000 | 2.258337000  | -1.745614000 |
| C | 0.112542000  | 2.140141000  | -0.888900000 |
| H | 2.141881000  | 2.763525000  | -0.560630000 |
| H | 2.279505000  | 4.131278000  | -2.625390000 |
| H | -1.758776000 | 3.123248000  | -3.566707000 |
| H | -1.920436000 | 1.782877000  | -1.485612000 |
| N | 0.236277000  | -0.184994000 | 0.163814000  |



|   |              |              |              |
|---|--------------|--------------|--------------|
| C | 1.533488000  | -0.555766000 | -0.392501000 |
| C | -0.727196000 | -2.358753000 | -0.373883000 |
| C | -0.843709000 | -0.865020000 | -0.548617000 |
| C | -1.741161000 | -3.239665000 | -0.484926000 |
| C | 0.090261000  | 1.264539000  | 0.360565000  |
| P | -1.356087000 | 1.635171000  | 1.457296000  |
| O | -1.289611000 | 0.615674000  | 2.688727000  |
| O | -0.882118000 | 3.063103000  | 2.028217000  |
| C | -0.117134000 | 0.402090000  | 3.506157000  |
| C | -0.527335000 | -0.413521000 | 4.712499000  |
| C | -1.847446000 | 4.007461000  | 2.558860000  |
| C | -1.240864000 | 5.391385000  | 2.500813000  |
| H | 0.623204000  | -0.130916000 | 2.908555000  |
| H | 0.293208000  | 1.368959000  | 3.804628000  |
| H | -2.760669000 | 3.940573000  | 1.968818000  |
| H | -2.078300000 | 3.719663000  | 3.586244000  |
| H | -1.941533000 | 6.117978000  | 2.915026000  |
| H | -0.317712000 | 5.437899000  | 3.078566000  |
| H | -1.020105000 | 5.673892000  | 1.471946000  |
| H | -0.944512000 | -1.370931000 | 4.402989000  |
| H | 0.342439000  | -0.603612000 | 5.343130000  |
| H | -1.274922000 | 0.114814000  | 5.303617000  |
| H | 1.591799000  | -0.310650000 | -1.467203000 |
| H | -0.833452000 | -0.605690000 | -1.621644000 |
| O | -2.697875000 | 1.610658000  | 0.835700000  |

|   |              |              |              |
|---|--------------|--------------|--------------|
| H | 2.306732000  | 0.032817000  | 0.102299000  |
| H | -1.797982000 | -0.524869000 | -0.150208000 |
| H | 0.949230000  | 1.563182000  | 0.966360000  |
| C | -3.703381000 | -1.940533000 | -1.445725000 |
| C | -5.376984000 | -4.049767000 | -0.751273000 |
| C | -5.906139000 | -2.918814000 | -1.364052000 |
| C | -5.062289000 | -1.871335000 | -1.715274000 |
| H | -3.072674000 | -1.122735000 | -1.753954000 |
| H | -6.022745000 | -4.875080000 | -0.482568000 |
| H | -6.965572000 | -2.857698000 | -1.573875000 |
| H | -5.463903000 | -0.993786000 | -2.203800000 |
| C | -3.150736000 | -3.066157000 | -0.813629000 |
| C | -4.018774000 | -4.123747000 | -0.490172000 |
| H | -3.609790000 | -5.008316000 | -0.019249000 |
| H | -1.456924000 | -4.262946000 | -0.264880000 |
| C | 3.012139000  | -2.578727000 | -0.019828000 |
| C | 4.662864000  | -0.836491000 | -0.835622000 |
| C | 4.344438000  | -1.985873000 | -0.095329000 |
| C | 5.958658000  | -0.339165000 | -0.857214000 |
| C | 5.386265000  | -2.627618000 | 0.594714000  |
| C | 6.676516000  | -2.122495000 | 0.583990000  |
| C | 6.968305000  | -0.971501000 | -0.140859000 |
| H | 6.182770000  | 0.540921000  | -1.445372000 |
| H | 5.166677000  | -3.529861000 | 1.150817000  |
| H | 7.457779000  | -2.630987000 | 1.133019000  |

|   |             |              |              |
|---|-------------|--------------|--------------|
| H | 7.976402000 | -0.579815000 | -0.159356000 |
| H | 2.992663000 | -3.635790000 | 0.222747000  |
| H | 3.906519000 | -0.350060000 | -1.432364000 |
| O | 0.751108000 | -4.107241000 | 0.267796000  |

#### B10

|   |              |              |              |
|---|--------------|--------------|--------------|
| C | 1.079729000  | -2.195401000 | -0.501055000 |
| C | 2.145238000  | -1.163938000 | -0.744435000 |
| F | -2.910057000 | 5.999399000  | -1.446017000 |
| C | -0.967569000 | 3.750391000  | 0.618765000  |
| C | -1.710553000 | 4.857311000  | 0.231905000  |
| C | -2.184042000 | 4.925361000  | -1.065989000 |
| C | -1.928910000 | 3.926469000  | -1.984259000 |
| C | -1.179507000 | 2.825504000  | -1.582888000 |
| C | -0.695811000 | 2.714220000  | -0.281118000 |
| H | -0.603608000 | 3.687979000  | 1.634530000  |
| H | -1.921681000 | 5.660528000  | 0.923529000  |
| H | -2.305340000 | 4.014362000  | -2.993597000 |
| H | -0.953478000 | 2.052173000  | -2.300838000 |
| N | 0.361259000  | 0.541208000  | -0.923041000 |
| C | 1.690801000  | 0.152669000  | -1.339230000 |
| C | -0.331796000 | -1.847490000 | -0.874658000 |
| C | -0.652517000 | -0.424512000 | -1.295652000 |
| C | -1.226592000 | -2.851662000 | -0.793922000 |
| C | 0.170337000  | 1.512496000  | 0.130171000  |

|   |              |              |              |
|---|--------------|--------------|--------------|
| P | -0.330870000 | 0.850704000  | 1.808588000  |
| O | -1.834481000 | 0.367221000  | 1.547181000  |
| O | 0.462541000  | -0.534668000 | 1.990367000  |
| C | -2.649665000 | -0.132824000 | 2.638441000  |
| C | -4.080913000 | -0.222917000 | 2.159787000  |
| C | 1.568850000  | -0.692031000 | 2.917562000  |
| C | 1.472967000  | -2.058408000 | 3.559952000  |
| H | -2.266125000 | -1.111921000 | 2.929819000  |
| H | -2.552975000 | 0.548288000  | 3.484299000  |
| H | 2.490686000  | -0.599618000 | 2.341992000  |
| H | 1.525465000  | 0.111196000  | 3.651197000  |
| H | 1.476785000  | -2.840589000 | 2.801956000  |
| H | 2.327403000  | -2.211483000 | 4.221635000  |
| H | 0.562588000  | -2.146721000 | 4.153270000  |
| H | -4.166696000 | -0.900026000 | 1.310596000  |
| H | -4.713193000 | -0.599947000 | 2.965170000  |
| H | -4.450982000 | 0.757907000  | 1.862644000  |
| H | 1.684547000  | 0.043196000  | -2.434332000 |
| H | -0.772147000 | -0.395566000 | -2.389850000 |
| O | -0.128740000 | 1.798541000  | 2.932177000  |
| H | 2.388111000  | 0.956398000  | -1.129415000 |
| H | -1.606505000 | -0.123868000 | -0.869365000 |
| H | 1.162698000  | 1.908764000  | 0.365237000  |
| C | -3.362091000 | -1.977843000 | -1.865881000 |
| C | -4.741498000 | -4.119803000 | -0.752442000 |

|   |              |              |              |
|---|--------------|--------------|--------------|
| C | -5.423406000 | -3.183511000 | -1.522770000 |
| C | -4.725336000 | -2.119771000 | -2.083098000 |
| H | -2.846239000 | -1.157166000 | -2.336889000 |
| H | -5.271567000 | -4.958536000 | -0.321291000 |
| H | -6.486352000 | -3.287779000 | -1.693944000 |
| H | -5.244484000 | -1.397088000 | -2.698454000 |
| C | -2.656160000 | -2.903846000 | -1.079618000 |
| C | -3.378383000 | -3.985246000 | -0.544604000 |
| H | -2.850318000 | -4.722514000 | 0.046224000  |
| H | -0.812833000 | -3.782634000 | -0.421873000 |
| C | 3.414529000  | -1.531902000 | -0.506010000 |
| C | 5.782690000  | -1.441191000 | -1.182988000 |
| C | 4.666201000  | -0.776483000 | -0.656245000 |
| C | 6.997351000  | -0.790239000 | -1.341608000 |
| C | 4.828745000  | 0.553509000  | -0.247503000 |
| C | 6.048612000  | 1.200350000  | -0.389828000 |
| C | 7.134935000  | 0.536123000  | -0.947943000 |
| H | 7.840145000  | -1.321660000 | -1.763134000 |
| H | 4.008322000  | 1.076959000  | 0.221992000  |
| H | 6.153034000  | 2.223918000  | -0.055273000 |
| H | 8.083578000  | 1.043214000  | -1.061021000 |
| H | 3.536403000  | -2.564456000 | -0.193619000 |
| H | 5.685952000  | -2.478147000 | -1.478147000 |
| O | 1.361444000  | -3.286231000 | -0.027661000 |

B11

|   |              |              |              |
|---|--------------|--------------|--------------|
| C | -0.008678000 | 2.817962000  | 0.486366000  |
| C | -1.263982000 | 2.138957000  | 0.032740000  |
| F | 5.001532000  | -3.793671000 | 0.760085000  |
| C | 2.189230000  | -2.696433000 | -1.225183000 |
| C | 3.378165000  | -3.325463000 | -0.879861000 |
| C | 3.843997000  | -3.192192000 | 0.414834000  |
| C | 3.160998000  | -2.455750000 | 1.366819000  |
| C | 1.972383000  | -1.836933000 | 1.004128000  |
| C | 1.474358000  | -1.944468000 | -0.295534000 |
| H | 1.809647000  | -2.803693000 | -2.232289000 |
| H | 3.936562000  | -3.911900000 | -1.595135000 |
| H | 3.555137000  | -2.378266000 | 2.370019000  |
| H | 1.429598000  | -1.257582000 | 1.736673000  |
| N | 0.071581000  | 0.103368000  | -0.232572000 |
| C | -1.153462000 | 0.794719000  | -0.640319000 |
| C | 1.283003000  | 2.217823000  | 0.031721000  |
| C | 1.213078000  | 0.902449000  | -0.700684000 |
| C | 2.390706000  | 2.953223000  | 0.236666000  |
| C | 0.156624000  | -1.292757000 | -0.689973000 |
| P | -1.156583000 | -2.474749000 | -0.077188000 |
| O | -1.288815000 | -2.301636000 | 1.509606000  |
| O | -2.534796000 | -1.917448000 | -0.706790000 |
| C | -1.915639000 | -1.201712000 | 2.211233000  |
| C | -2.161811000 | -1.636712000 | 3.639103000  |

|   |              |              |              |
|---|--------------|--------------|--------------|
| C | -3.643704000 | -2.832322000 | -0.940038000 |
| C | -3.675768000 | -3.278377000 | -2.385998000 |
| H | -1.252270000 | -0.338578000 | 2.167308000  |
| H | -2.850762000 | -0.946312000 | 1.711529000  |
| H | -3.553794000 | -3.688068000 | -0.272138000 |
| H | -4.537489000 | -2.270197000 | -0.672541000 |
| H | -4.547455000 | -3.913280000 | -2.555681000 |
| H | -3.741921000 | -2.421047000 | -3.056394000 |
| H | -2.781135000 | -3.850027000 | -2.626817000 |
| H | -1.226021000 | -1.902762000 | 4.129622000  |
| H | -2.623499000 | -0.820749000 | 4.197145000  |
| H | -2.825589000 | -2.500154000 | 3.674211000  |
| H | -1.172230000 | 0.908901000  | -1.741039000 |
| H | 1.123856000  | 1.089066000  | -1.787586000 |
| O | -0.850787000 | -3.870318000 | -0.444849000 |
| H | -2.018376000 | 0.194098000  | -0.384354000 |
| H | 2.122155000  | 0.336880000  | -0.563350000 |
| H | 0.061331000  | -1.360264000 | -1.786425000 |
| C | 4.570418000  | 3.835294000  | -0.456431000 |
| C | 5.775488000  | 1.343621000  | -0.392796000 |
| C | 6.516482000  | 2.457665000  | -0.771471000 |
| C | 5.908001000  | 3.707391000  | -0.798668000 |
| H | 4.105327000  | 4.812759000  | -0.464184000 |
| H | 6.246545000  | 0.371116000  | -0.341766000 |
| H | 7.562100000  | 2.354274000  | -1.028419000 |

|   |              |             |              |
|---|--------------|-------------|--------------|
| H | 6.478167000  | 4.584026000 | -1.075797000 |
| C | 3.796066000  | 2.717510000 | -0.108886000 |
| C | 4.432133000  | 1.468809000 | -0.068228000 |
| H | 3.893645000  | 0.592586000 | 0.259442000  |
| H | 2.198595000  | 3.917140000 | 0.696850000  |
| C | -2.417720000 | 2.787092000 | 0.283463000  |
| C | -4.200130000 | 1.592572000 | -1.072532000 |
| C | -3.801577000 | 2.448770000 | -0.033700000 |
| C | -5.544058000 | 1.338104000 | -1.308791000 |
| C | -4.809485000 | 3.053409000 | 0.736850000  |
| C | -6.150064000 | 2.787252000 | 0.509404000  |
| C | -6.523971000 | 1.924601000 | -0.515756000 |
| H | -5.827693000 | 0.686037000 | -2.124297000 |
| H | -4.523743000 | 3.735615000 | 1.527104000  |
| H | -6.904462000 | 3.259717000 | 1.124138000  |
| H | -7.569824000 | 1.722344000 | -0.703806000 |
| H | -2.293751000 | 3.709672000 | 0.840390000  |
| H | -3.463781000 | 1.148305000 | -1.723368000 |
| O | -0.040785000 | 3.828954000 | 1.171427000  |

B12

|   |              |              |              |
|---|--------------|--------------|--------------|
| C | 1.061034000  | -2.488717000 | -0.785514000 |
| C | 2.170613000  | -1.496075000 | -0.629262000 |
| F | -0.826254000 | 5.584664000  | -2.844596000 |
| C | 0.904634000  | 3.412943000  | -0.535076000 |



|   |              |              |              |
|---|--------------|--------------|--------------|
| C | 0.675559000  | 4.448941000  | -1.431677000 |
| C | -0.588893000 | 4.583100000  | -1.973220000 |
| C | -1.620858000 | 3.724486000  | -1.640112000 |
| C | -1.371280000 | 2.695931000  | -0.741265000 |
| C | -0.105029000 | 2.516942000  | -0.178818000 |
| H | 1.888036000  | 3.311894000  | -0.094186000 |
| H | 1.454259000  | 5.147305000  | -1.702942000 |
| H | -2.600341000 | 3.872394000  | -2.072086000 |
| H | -2.181565000 | 2.039449000  | -0.460407000 |
| N | 0.478852000  | 0.055022000  | 0.187064000  |
| C | 1.800864000  | -0.049240000 | -0.426562000 |
| C | -0.321676000 | -1.940265000 | -0.955682000 |
| C | -0.538388000 | -0.465942000 | -0.722353000 |
| C | -1.280372000 | -2.823218000 | -1.293621000 |
| C | 0.218361000  | 1.377623000  | 0.780177000  |
| P | -0.883910000 | 1.321100000  | 2.267738000  |
| O | -2.265404000 | 0.666518000  | 1.739571000  |
| O | -0.238304000 | 0.240850000  | 3.258300000  |
| C | -3.470936000 | 0.815447000  | 2.539094000  |
| C | -4.668348000 | 0.520056000  | 1.664826000  |
| C | -0.294311000 | -1.199641000 | 3.135725000  |
| C | -0.098012000 | -1.797489000 | 4.512020000  |
| H | -3.415349000 | 0.118391000  | 3.377568000  |
| H | -3.498123000 | 1.829469000  | 2.935964000  |
| H | 0.487282000  | -1.514115000 | 2.447152000  |

|   |              |              |              |
|---|--------------|--------------|--------------|
| H | -1.256327000 | -1.487421000 | 2.710867000  |
| H | -0.110070000 | -2.886524000 | 4.444870000  |
| H | 0.858861000  | -1.489550000 | 4.932503000  |
| H | -0.888778000 | -1.483246000 | 5.193055000  |
| H | -4.614563000 | -0.484766000 | 1.247041000  |
| H | -5.581049000 | 0.597857000  | 2.257600000  |
| H | -4.735671000 | 1.232818000  | 0.843062000  |
| H | 1.839527000  | 0.503648000  | -1.381658000 |
| H | -0.526049000 | 0.081027000  | -1.680585000 |
| O | -1.019869000 | 2.634501000  | 2.924279000  |
| H | 2.530285000  | 0.416143000  | 0.236259000  |
| H | -1.519082000 | -0.313594000 | -0.279938000 |
| H | 1.150557000  | 1.652125000  | 1.280337000  |
| C | -3.549022000 | -3.743462000 | -1.411152000 |
| C | -4.637360000 | -1.342261000 | -2.260054000 |
| C | -5.463219000 | -2.444366000 | -2.069301000 |
| C | -4.911548000 | -3.648899000 | -1.644964000 |
| H | -3.122027000 | -4.686395000 | -1.094685000 |
| H | -5.054951000 | -0.409104000 | -2.614183000 |
| H | -6.524620000 | -2.369405000 | -2.263804000 |
| H | -5.542701000 | -4.516601000 | -1.507004000 |
| C | -2.701469000 | -2.633800000 | -1.567490000 |
| C | -3.274962000 | -1.431672000 | -2.010752000 |
| H | -2.651775000 | -0.571491000 | -2.199580000 |
| H | -0.940474000 | -3.852053000 | -1.344702000 |

|   |             |              |              |
|---|-------------|--------------|--------------|
| C | 3.425601000 | -1.982814000 | -0.647307000 |
| C | 4.938313000 | 0.033550000  | -0.909632000 |
| C | 4.712836000 | -1.302969000 | -0.544432000 |
| C | 6.198417000 | 0.602200000  | -0.787382000 |
| C | 5.809373000 | -2.047550000 | -0.078810000 |
| C | 7.063592000 | -1.474601000 | 0.057136000  |
| C | 7.263102000 | -0.143630000 | -0.294637000 |
| H | 6.351601000 | 1.630586000  | -1.086508000 |
| H | 5.661175000 | -3.086714000 | 0.185185000  |
| H | 7.888499000 | -2.067552000 | 0.428808000  |
| H | 8.242861000 | 0.304422000  | -0.198409000 |
| H | 3.483420000 | -3.063602000 | -0.719233000 |
| H | 4.138262000 | 0.622469000  | -1.331066000 |
| O | 1.280099000 | -3.690513000 | -0.811258000 |

### B13

|   |              |              |              |
|---|--------------|--------------|--------------|
| C | -0.222452000 | 2.951573000  | -0.506882000 |
| C | 1.077359000  | 2.255380000  | -0.241211000 |
| F | -4.344267000 | -4.122223000 | -1.616555000 |
| C | -2.101344000 | -2.849116000 | 0.914471000  |
| C | -3.110680000 | -3.592748000 | 0.318389000  |
| C | -3.361838000 | -3.407037000 | -1.029119000 |
| C | -2.640912000 | -2.505149000 | -1.790999000 |
| C | -1.633284000 | -1.770382000 | -1.178150000 |
| C | -1.352948000 | -1.931693000 | 0.178655000  |

|   |              |              |              |
|---|--------------|--------------|--------------|
| H | -1.887201000 | -2.996546000 | 1.964361000  |
| H | -3.695176000 | -4.306521000 | 0.880855000  |
| H | -2.870789000 | -2.384534000 | -2.840124000 |
| H | -1.067113000 | -1.047978000 | -1.748043000 |
| N | -0.158005000 | 0.216844000  | 0.301235000  |
| C | 1.051487000  | 0.989844000  | 0.581339000  |
| C | -1.467960000 | 2.282058000  | -0.012283000 |
| C | -1.324093000 | 0.986821000  | 0.745425000  |
| C | -2.624014000 | 2.937667000  | -0.213619000 |
| C | -0.226457000 | -1.145753000 | 0.839358000  |
| P | 1.295167000  | -2.206570000 | 0.728468000  |
| O | 1.950386000  | -1.898560000 | -0.709328000 |
| O | 2.269310000  | -1.500673000 | 1.793541000  |
| C | 2.321866000  | -2.959673000 | -1.632190000 |
| C | 1.987005000  | -2.529983000 | -3.042902000 |
| C | 3.472855000  | -2.169606000 | 2.247849000  |
| C | 3.968758000  | -1.462230000 | 3.488839000  |
| H | 3.393866000  | -3.128143000 | -1.517574000 |
| H | 1.798464000  | -3.870014000 | -1.346469000 |
| H | 3.236731000  | -3.214708000 | 2.446749000  |
| H | 4.214418000  | -2.122669000 | 1.447600000  |
| H | 4.881247000  | -1.942022000 | 3.845917000  |
| H | 4.190210000  | -0.416236000 | 3.279212000  |
| H | 3.223699000  | -1.508067000 | 4.282652000  |
| H | 2.495879000  | -1.602383000 | -3.304179000 |

|   |              |              |              |
|---|--------------|--------------|--------------|
| H | 2.305333000  | -3.303655000 | -3.743705000 |
| H | 0.914262000  | -2.382906000 | -3.161334000 |
| H | 1.105053000  | 1.258837000  | 1.652395000  |
| H | -1.234583000 | 1.211750000  | 1.825721000  |
| O | 1.045365000  | -3.641778000 | 0.985829000  |
| H | 1.925242000  | 0.392511000  | 0.376321000  |
| H | -2.210518000 | 0.376264000  | 0.634242000  |
| H | -0.410130000 | -1.138308000 | 1.927144000  |
| C | -4.545412000 | 1.297715000  | -0.016322000 |
| C | -6.157934000 | 3.330756000  | 0.975337000  |
| C | -6.674994000 | 2.048383000  | 0.829291000  |
| C | -5.866746000 | 1.038023000  | 0.320244000  |
| H | -3.948058000 | 0.506654000  | -0.445693000 |
| H | -6.782616000 | 4.128422000  | 1.354793000  |
| H | -7.702932000 | 1.841586000  | 1.095060000  |
| H | -6.267721000 | 0.043666000  | 0.176084000  |
| C | -4.002029000 | 2.579201000  | 0.144282000  |
| C | -4.843046000 | 3.594913000  | 0.621611000  |
| H | -4.450118000 | 4.598441000  | 0.723279000  |
| H | -2.510011000 | 3.912094000  | -0.677976000 |
| C | 2.184022000  | 2.860968000  | -0.705594000 |
| C | 4.547091000  | 3.492532000  | -0.464532000 |
| C | 3.598407000  | 2.474529000  | -0.641902000 |
| C | 5.904047000  | 3.210516000  | -0.409274000 |
| C | 4.065937000  | 1.164205000  | -0.812569000 |

|   |              |              |              |
|---|--------------|--------------|--------------|
| C | 5.425622000  | 0.886174000  | -0.775900000 |
| C | 6.350077000  | 1.902809000  | -0.562693000 |
| H | 6.613933000  | 4.012937000  | -0.258866000 |
| H | 3.371273000  | 0.361851000  | -1.012109000 |
| H | 5.765999000  | -0.130106000 | -0.925722000 |
| H | 7.408270000  | 1.680301000  | -0.532816000 |
| H | 1.999044000  | 3.821045000  | -1.177044000 |
| H | 4.206585000  | 4.514933000  | -0.361720000 |
| O | -0.268305000 | 4.009756000  | -1.114962000 |

#### B14

|   |              |              |              |
|---|--------------|--------------|--------------|
| C | 0.285511000  | -3.131876000 | 0.324722000  |
| C | 1.497522000  | -2.319339000 | 0.000796000  |
| F | -4.938813000 | 3.252402000  | 1.338408000  |
| C | -2.358339000 | 2.286013000  | -0.998898000 |
| C | -3.530106000 | 2.845837000  | -0.503555000 |
| C | -3.801062000 | 2.718479000  | 0.845884000  |
| C | -2.945711000 | 2.050585000  | 1.705488000  |
| C | -1.779174000 | 1.500158000  | 1.192625000  |
| C | -1.469237000 | 1.613786000  | -0.163371000 |
| H | -2.141134000 | 2.370921000  | -2.056075000 |
| H | -4.227403000 | 3.363978000  | -1.146138000 |
| H | -3.196138000 | 1.968322000  | 2.753589000  |
| H | -1.100930000 | 0.968453000  | 1.843236000  |
| N | 0.010204000  | -0.355994000 | -0.244418000 |

|   |              |              |              |
|---|--------------|--------------|--------------|
| C | 1.340505000  | -0.906971000 | -0.500644000 |
| C | -1.036087000 | -2.557161000 | -0.078520000 |
| C | -1.005128000 | -1.247116000 | -0.817087000 |
| C | -2.129177000 | -3.292256000 | 0.181258000  |
| C | -0.184295000 | 1.020542000  | -0.715946000 |
| P | 1.255161000  | 2.160262000  | -0.409609000 |
| O | 0.670115000  | 3.627440000  | -0.708746000 |
| O | 1.378113000  | 2.136110000  | 1.181543000  |
| C | 0.994347000  | 4.358652000  | -1.916732000 |
| C | 1.239031000  | 5.809202000  | -1.562511000 |
| C | 2.432914000  | 2.866506000  | 1.858661000  |
| C | 2.428611000  | 2.460740000  | 3.314830000  |
| H | 1.868490000  | 3.904543000  | -2.380767000 |
| H | 0.143908000  | 4.261957000  | -2.594198000 |
| H | 2.237170000  | 3.933831000  | 1.744140000  |
| H | 3.383349000  | 2.630635000  | 1.379384000  |
| H | 2.617761000  | 1.393083000  | 3.420587000  |
| H | 3.209594000  | 3.003388000  | 3.849449000  |
| H | 1.470338000  | 2.691705000  | 3.779268000  |
| H | 2.104343000  | 5.908418000  | -0.907314000 |
| H | 1.430283000  | 6.383106000  | -2.470756000 |
| H | 0.372314000  | 6.238740000  | -1.060660000 |
| H | 1.576401000  | -0.866293000 | -1.579003000 |
| H | -0.784478000 | -1.435134000 | -1.885439000 |
| O | 2.489487000  | 1.864003000  | -1.177174000 |

|   |              |              |              |
|---|--------------|--------------|--------------|
| H | 2.076564000  | -0.281511000 | -0.004556000 |
| H | -1.971442000 | -0.759746000 | -0.785024000 |
| H | -0.241656000 | 1.053370000  | -1.819812000 |
| C | -4.355613000 | -4.067713000 | -0.535277000 |
| C | -5.508983000 | -1.589926000 | -0.077680000 |
| C | -6.288479000 | -2.633879000 | -0.563087000 |
| C | -5.705877000 | -3.876184000 | -0.788713000 |
| H | -3.910628000 | -5.040981000 | -0.698272000 |
| H | -5.958008000 | -0.627219000 | 0.127314000  |
| H | -7.343539000 | -2.484741000 | -0.749461000 |
| H | -6.306215000 | -4.699777000 | -1.151849000 |
| C | -3.547366000 | -3.016151000 | -0.080694000 |
| C | -4.153741000 | -1.776290000 | 0.159027000  |
| H | -3.573809000 | -0.963545000 | 0.571885000  |
| H | -1.921768000 | -4.261551000 | 0.623974000  |
| C | 2.687417000  | -2.930443000 | 0.178161000  |
| C | 4.461470000  | -1.313700000 | -0.691072000 |
| C | 4.061558000  | -2.491351000 | -0.033220000 |
| C | 5.806846000  | -1.001188000 | -0.827680000 |
| C | 5.073528000  | -3.336534000 | 0.459256000  |
| C | 6.414640000  | -3.018981000 | 0.325490000  |
| C | 6.788153000  | -1.844584000 | -0.319709000 |
| H | 6.086169000  | -0.089706000 | -1.338924000 |
| H | 4.787322000  | -4.253611000 | 0.957834000  |
| H | 7.168465000  | -3.687386000 | 0.719752000  |



|   |             |              |              |
|---|-------------|--------------|--------------|
| H | 7.834378000 | -1.592416000 | -0.430738000 |
| H | 2.602782000 | -3.938609000 | 0.568608000  |
| H | 3.740639000 | -0.632893000 | -1.112406000 |
| O | 0.366697000 | -4.217058000 | 0.880746000  |

## B15

|   |              |              |              |
|---|--------------|--------------|--------------|
| C | -0.120242000 | -3.142399000 | -0.420340000 |
| C | 1.151624000  | -2.533721000 | 0.078612000  |
| F | 4.899941000  | 3.234884000  | -1.630285000 |
| C | 1.751471000  | 1.472345000  | -1.393940000 |
| C | 2.908085000  | 2.014962000  | -1.938541000 |
| C | 3.771131000  | 2.710464000  | -1.108919000 |
| C | 3.515826000  | 2.878733000  | 0.239982000  |
| C | 2.353636000  | 2.328331000  | 0.768364000  |
| C | 1.461827000  | 1.622287000  | -0.036251000 |
| H | 1.064659000  | 0.920894000  | -2.019824000 |
| H | 3.143938000  | 1.905287000  | -2.987447000 |
| H | 4.217926000  | 3.421285000  | 0.856741000  |
| H | 2.143101000  | 2.450423000  | 1.822905000  |
| N | 0.031134000  | -0.363180000 | 0.128225000  |
| C | 1.042363000  | -1.204429000 | 0.773837000  |
| C | -1.376857000 | -2.355046000 | -0.211487000 |
| C | -1.293663000 | -0.946866000 | 0.327786000  |
| C | -2.523513000 | -2.979688000 | -0.546209000 |
| C | 0.183455000  | 1.036016000  | 0.541861000  |

|   |              |              |              |
|---|--------------|--------------|--------------|
| P | -1.229260000 | 2.142224000  | 0.051574000  |
| O | -2.252369000 | 1.883782000  | 1.262840000  |
| O | -0.719798000 | 3.628052000  | 0.396755000  |
| C | -3.523024000 | 2.579766000  | 1.298089000  |
| C | -4.220624000 | 2.225605000  | 2.592236000  |
| C | -0.318127000 | 4.566777000  | -0.634784000 |
| C | -0.676980000 | 5.964117000  | -0.179716000 |
| H | -3.335128000 | 3.652861000  | 1.237480000  |
| H | -4.108225000 | 2.280075000  | 0.428210000  |
| H | 0.757784000  | 4.463563000  | -0.776587000 |
| H | -0.821266000 | 4.302385000  | -1.563480000 |
| H | -0.193822000 | 6.201606000  | 0.767973000  |
| H | -0.344865000 | 6.688835000  | -0.924763000 |
| H | -1.754645000 | 6.071494000  | -0.055982000 |
| H | -3.622339000 | 2.529260000  | 3.450869000  |
| H | -5.182499000 | 2.737704000  | 2.644389000  |
| H | -4.399628000 | 1.152754000  | 2.660028000  |
| H | 1.994192000  | -0.688135000 | 0.770267000  |
| H | -2.025863000 | -0.336355000 | -0.196241000 |
| O | -1.758173000 | 1.981825000  | -1.320785000 |
| H | 0.779753000  | -1.367494000 | 1.836933000  |
| H | -1.564539000 | -0.938185000 | 1.399269000  |
| H | 0.220782000  | 1.134514000  | 1.638959000  |
| C | -4.843453000 | -3.272901000 | -1.257930000 |
| C | -5.761485000 | -1.202348000 | 0.331900000  |

|   |              |              |              |
|---|--------------|--------------|--------------|
| C | -6.655232000 | -1.903919000 | -0.469048000 |
| C | -6.189284000 | -2.945123000 | -1.264776000 |
| H | -4.486801000 | -4.090316000 | -1.871163000 |
| H | -6.120525000 | -0.404460000 | 0.968540000  |
| H | -7.706333000 | -1.648385000 | -0.465378000 |
| H | -6.876561000 | -3.505272000 | -1.884550000 |
| C | -3.917867000 | -2.559446000 | -0.476712000 |
| C | -4.410937000 | -1.520622000 | 0.329348000  |
| H | -3.746658000 | -0.975807000 | 0.980496000  |
| H | -2.375561000 | -3.967849000 | -0.967911000 |
| C | 2.275683000  | -3.252950000 | -0.067921000 |
| C | 4.261009000  | -1.693340000 | 0.040788000  |
| C | 3.659821000  | -2.930694000 | 0.304552000  |
| C | 5.585369000  | -1.458501000 | 0.385008000  |
| C | 4.442676000  | -3.931480000 | 0.896474000  |
| C | 5.760444000  | -3.690341000 | 1.256692000  |
| C | 6.337242000  | -2.450484000 | 1.004330000  |
| H | 6.032875000  | -0.499847000 | 0.158893000  |
| H | 4.003481000  | -4.903343000 | 1.081937000  |
| H | 6.341165000  | -4.474149000 | 1.724668000  |
| H | 7.368068000  | -2.264102000 | 1.274110000  |
| H | 2.128093000  | -4.238607000 | -0.498210000 |
| H | 3.703347000  | -0.923185000 | -0.472824000 |
| O | -0.131492000 | -4.236550000 | -0.963388000 |

B16

|   |              |              |              |
|---|--------------|--------------|--------------|
| C | 0.049576000  | 2.903133000  | -0.516007000 |
| C | 1.306177000  | 2.155670000  | -0.190493000 |
| F | -4.862693000 | -3.600380000 | -1.543015000 |
| C | -1.823862000 | -1.660580000 | -1.270450000 |
| C | -2.952544000 | -2.250907000 | -1.823719000 |
| C | -3.761667000 | -3.027063000 | -1.012514000 |
| C | -3.479894000 | -3.228532000 | 0.326086000  |
| C | -2.347574000 | -2.629330000 | 0.862797000  |
| C | -1.510874000 | -1.839996000 | 0.077216000  |
| H | -1.180633000 | -1.043966000 | -1.881263000 |
| H | -3.207588000 | -2.117293000 | -2.865359000 |
| H | -4.135269000 | -3.841873000 | 0.927547000  |
| H | -2.110975000 | -2.788836000 | 1.906263000  |
| N | -0.093053000 | 0.167855000  | 0.193892000  |
| C | 1.215354000  | 0.775891000  | 0.414314000  |
| C | -1.233110000 | 2.318911000  | -0.016453000 |
| C | -1.133877000 | 1.033449000  | 0.758599000  |
| C | -2.353144000 | 3.028678000  | -0.232166000 |
| C | -0.258045000 | -1.208371000 | 0.669692000  |
| P | 1.136563000  | -2.404200000 | 0.392467000  |
| O | 1.584226000  | -2.076487000 | -1.106690000 |
| O | 2.376869000  | -1.890635000 | 1.293429000  |
| C | 2.494279000  | -2.956534000 | -1.816927000 |
| C | 2.467539000  | -2.581820000 | -3.281127000 |

|   |              |              |              |
|---|--------------|--------------|--------------|
| C | 2.911765000  | -2.686596000 | 2.382906000  |
| C | 2.445860000  | -2.156854000 | 3.723343000  |
| H | 3.492538000  | -2.828862000 | -1.394071000 |
| H | 2.175286000  | -3.986655000 | -1.658963000 |
| H | 2.611586000  | -3.722908000 | 2.241273000  |
| H | 3.994823000  | -2.614721000 | 2.287733000  |
| H | 2.918438000  | -2.724898000 | 4.526638000  |
| H | 2.710669000  | -1.106646000 | 3.846566000  |
| H | 1.365849000  | -2.259747000 | 3.830937000  |
| H | 2.768179000  | -1.544244000 | -3.423178000 |
| H | 3.157261000  | -3.219646000 | -3.835886000 |
| H | 1.468648000  | -2.714102000 | -3.695423000 |
| H | 1.448134000  | 0.825953000  | 1.494099000  |
| H | -0.905455000 | 1.259077000  | 1.817994000  |
| O | 0.765815000  | -3.806026000 | 0.686503000  |
| H | 1.974434000  | 0.149427000  | -0.043339000 |
| H | -2.077746000 | 0.504252000  | 0.756077000  |
| H | -0.351118000 | -1.240355000 | 1.769883000  |
| C | -4.353314000 | 1.493944000  | 0.024584000  |
| C | -5.864559000 | 3.644330000  | 0.926784000  |
| C | -6.444269000 | 2.384065000  | 0.831799000  |
| C | -5.686357000 | 1.314729000  | 0.367753000  |
| H | -3.796068000 | 0.657264000  | -0.370831000 |
| H | -6.449363000 | 4.487095000  | 1.270655000  |
| H | -7.481713000 | 2.239406000  | 1.101779000  |

|   |              |             |              |
|---|--------------|-------------|--------------|
| H | -6.136060000 | 0.336430000 | 0.262761000  |
| C | -3.747484000 | 2.752718000 | 0.134453000  |
| C | -4.537657000 | 3.827539000 | 0.567215000  |
| H | -4.095125000 | 4.813550000 | 0.629048000  |
| H | -2.188584000 | 3.983340000 | -0.721885000 |
| C | 2.459987000  | 2.792766000 | -0.474926000 |
| C | 4.327885000  | 1.358936000 | 0.497305000  |
| C | 3.858081000  | 2.417657000 | -0.298876000 |
| C | 5.686353000  | 1.092641000 | 0.595607000  |
| C | 4.815136000  | 3.199461000 | -0.970595000 |
| C | 6.169837000  | 2.926365000 | -0.878093000 |
| C | 6.612906000  | 1.867169000 | -0.093120000 |
| H | 6.023890000  | 0.275894000 | 1.219909000  |
| H | 4.476023000  | 4.029815000 | -1.576362000 |
| H | 6.880882000  | 3.542283000 | -1.412282000 |
| H | 7.670113000  | 1.652801000 | -0.012152000 |
| H | 2.317386000  | 3.760460000 | -0.943199000 |
| H | 3.641383000  | 0.747661000 | 1.059416000  |
| O | 0.072127000  | 3.949730000 | -1.145921000 |

B17

|   |              |              |              |
|---|--------------|--------------|--------------|
| C | 0.820441000  | -2.285951000 | 0.292536000  |
| C | 1.935025000  | -1.558819000 | -0.392246000 |
| F | -4.998807000 | 3.535481000  | -1.718460000 |
| C | -2.326264000 | 1.873295000  | 0.063172000  |

|   |              |              |              |
|---|--------------|--------------|--------------|
| C | -3.578736000 | 2.408819000  | -0.215930000 |
| C | -3.787009000 | 3.010091000  | -1.442522000 |
| C | -2.788651000 | 3.090941000  | -2.397579000 |
| C | -1.545968000 | 2.549328000  | -2.100722000 |
| C | -1.293410000 | 1.937374000  | -0.871134000 |
| H | -2.158052000 | 1.404821000  | 1.021753000  |
| H | -4.383759000 | 2.363466000  | 0.503356000  |
| H | -2.987684000 | 3.570740000  | -3.345178000 |
| H | -0.757552000 | 2.598241000  | -2.840644000 |
| N | 0.244400000  | 0.047283000  | -1.276840000 |
| C | 1.572762000  | -0.515782000 | -1.437346000 |
| C | -0.571756000 | -2.060452000 | -0.213467000 |
| C | -0.790188000 | -0.967806000 | -1.237852000 |
| C | -1.527906000 | -2.871574000 | 0.278848000  |
| C | 0.088424000  | 1.348912000  | -0.638667000 |
| P | 0.766158000  | 1.527644000  | 1.093228000  |
| O | 0.237170000  | 2.952759000  | 1.630835000  |
| O | -0.051929000 | 0.454146000  | 1.956274000  |
| C | 1.129384000  | 4.035675000  | 1.992781000  |
| C | 1.041513000  | 5.157294000  | 0.978891000  |
| C | 0.377630000  | 0.130621000  | 3.309937000  |
| C | -0.443572000 | -1.034366000 | 3.811963000  |
| H | 0.801886000  | 4.371949000  | 2.976470000  |
| H | 2.142888000  | 3.646162000  | 2.073067000  |
| H | 1.439171000  | -0.111562000 | 3.281917000  |

|   |              |              |              |
|---|--------------|--------------|--------------|
| H | 0.233766000  | 1.016461000  | 3.931907000  |
| H | -0.154541000 | -1.261484000 | 4.839607000  |
| H | -1.507274000 | -0.796035000 | 3.801204000  |
| H | -0.268119000 | -1.918848000 | 3.202255000  |
| H | 0.014474000  | 5.504652000  | 0.869714000  |
| H | 1.657297000  | 5.997779000  | 1.304274000  |
| H | 1.402991000  | 4.832425000  | 0.002787000  |
| H | 1.612863000  | -0.996163000 | -2.425450000 |
| H | -0.835554000 | -1.420067000 | -2.239387000 |
| O | 2.245699000  | 1.405737000  | 1.141504000  |
| H | 2.302771000  | 0.286242000  | -1.451515000 |
| H | -1.754493000 | -0.493847000 | -1.075242000 |
| H | 0.794687000  | 2.010739000  | -1.155165000 |
| C | -3.590434000 | -2.473459000 | -1.154736000 |
| C | -5.129310000 | -3.736353000 | 0.785663000  |
| C | -5.737755000 | -3.232938000 | -0.359454000 |
| C | -4.960450000 | -2.610584000 | -1.329363000 |
| H | -3.012314000 | -2.013398000 | -1.939858000 |
| H | -5.721736000 | -4.233951000 | 1.541892000  |
| H | -6.805445000 | -3.334820000 | -0.499854000 |
| H | -5.422379000 | -2.233567000 | -2.232128000 |
| C | -2.958022000 | -2.960465000 | 0.001185000  |
| C | -3.760193000 | -3.610502000 | 0.955384000  |
| H | -3.290196000 | -4.013729000 | 1.843112000  |
| H | -1.176221000 | -3.566658000 | 1.033737000  |



|   |             |              |              |
|---|-------------|--------------|--------------|
| C | 3.184098000 | -1.959800000 | -0.105610000 |
| C | 5.433239000 | -2.341296000 | -1.063350000 |
| C | 4.460867000 | -1.438277000 | -0.613990000 |
| C | 6.657436000 | -1.892745000 | -1.538396000 |
| C | 4.770130000 | -0.072093000 | -0.605436000 |
| C | 6.003543000 | 0.371128000  | -1.065262000 |
| C | 6.945877000 | -0.532386000 | -1.544250000 |
| H | 7.389952000 | -2.605128000 | -1.894404000 |
| H | 4.060892000 | 0.629243000  | -0.187159000 |
| H | 6.233325000 | 1.428340000  | -1.038626000 |
| H | 7.903546000 | -0.181060000 | -1.904858000 |
| H | 3.255978000 | -2.803961000 | 0.572957000  |
| H | 5.217811000 | -3.402268000 | -1.047648000 |
| O | 1.040641000 | -3.048475000 | 1.224440000  |
